# Supplementary material for: Genetic portrait of polyamine transporters in barley: insights in the regulation of leaf senescence
Source: Front Plant Sci. 2023 Jun 2;14:1194737. doi: 10.3389/fpls.2023.1194737 (PMC10272464; doi:10.3389/fpls.2023.1194737)
Supplement: Supplementary Table 1 — Details of predicted transmembrane domains in HvBAT and HvPUT proteins sequences in barley. [file DataSheet_2.xlsx]

## Sheet: Table S1
Supplementary Table S1: Details of predicted transmembrane domains in HvBAT and HvPUT proteins sequences in barley
Protein Name	Position of transmembrane domains (N -> C)
HvBAT1	45-70, 76-106,126-156, 175-195, 199-223, 248-266, 283-309, 340-370, 395-412, 420-443, 459-480, 493-512
HvBAT2	41-63, 73-103, 122-152, 171-191, 195-219, 244-262, 279-305, 337-367, 391-408, 416-439, 455-476, 489-508
HvBAT3	42-62, 72-102, 122-152, 170-192, 196-219, 244-265, 280-304, 336-366, 391-408, 415-439, 455-476, 489-508
HvBAT4	33-59, 65-95, 113-143, 165-185, 189-213, 238-256, 273-299, 329-359, 385-402, 410-433, 449-469, 483-502
HvBAT5	44-65, 70-100, 124-154, 171-193, 197-221, 245-267, 281-307, 339-369, 393-410, 418-440, 457-478, 491-510
HvBAT6	30-55, 60-87, 109-139, 159-179, 183-208, 232-251, 268-294, 326-356, 381-399, 407-430, 446-467, 480-499
HvPUT1	79-100, 104-133, 153-183, 194-210, 217-238, 256-273, 288-312, 337-267, 387-403, 407-431, 445-466, 473-490
HvPUT2	18-36, 48-74, 93-123, 134-150, 157-179, 197-213, 228-252, 278-306, 328-345, 349-372, 386-407, 414-431
HvPUT3	45-64, 71-100, 118-148, 160-177, 184-206, 224-241, 256-279, 304-334, 354-371, 375-398, 412-433, 440-459
HvPUT4	44-66, 71-98, 117-147, 160-176, 183-205, 222-239, 253-277, 302-332, 354-369, 374-397, 411-431, 440-456
HvPUT5	61-84, 88-117, 135-165, 176-192, 199-221, 239-256, 271-295
HvPUT6	57-77, 82-110, 131-161, 173-189, 196-218, 235-253, 267-291, 316-346, 368-383, 388-411, 425-446, 453-470
HvPUT7	61-81, 88-116, 135-165, 177-193, 200-222, 240-258, 272-296, 321-351, 373-388, 393-416, 430-450, 457-475

## Sheet: Table S2
Supplementary Table S2: Accession numbers of BAT and PUT family from various plants used in this study.
Plant Name	Protein Name	Accession Number
Arabidopsis thaliana	AtBAT1	At2g01170
Cucumis melo	CmBAT1	MELO3C012281
Populus trichocarpa	PtBAT1	Potri.002G078500
	PtBAT2	Potri.008G125100
	PtBAT3	Potri.002G078300
	PtBAT4	Potri.002G078100
	PtBAT5	Potri.007G100700
	PtBAT6	Potri.010G119100
Solanum lycopersicum	SlBAT1	Solyc05g008760
Vitis vinifera	VvBAT1	GSVIVG01022329001
	VvBAT2	GSVIVG01008812001
	VvBAT3	GSVIVG01011824001
Brachypodium distachyon	BdBAT1	Bradi2g43062
	BdBAT2	Bradi2g10510
	BdBAT3	Bradi5g10510
	BdBAT4	Bradi2g60580
	BdBAT5	Bradi2g60597
	BdBAT6	Bradi2g60590
Zea mays	ZmBAT1	GRMZM2G013456
	ZmBAT2	GRMZM2G030814
	ZmBAT3	GRMZM2G116554
	ZmBAT4	GRMZM2G136508
	ZmBAT5	GRMZM2G158625
	ZmBAT6	GRMZM2G309163
Oryza sativa	OsBAT1	LOC_Os01g42234
	OsBAT2	LOC_Os01g71700
	OsBAT3	LOC_Os01g71710
	OsBAT4	LOC_Os01g71720
	OsBAT5	LOC_Os01g71740
	OsBAT6	LOC_Os01g71760
	OsBAT7	LOC_Os04g35540
Citrus sinensis	CsPUT1	Cs8g02380.1
	CsPUT2	Cs8g04380.1
	CsPUT3	Cs3g10170.1
	CsPUT4	orange1.1t02114.1
	CsPUT5	Cs9g02830.1
	CsPUT6	Cs9g11970.1
	CsPUT7	Cs9g12090.1
	CsPUT8	Cs9g12130.1
Arabidopsis thaliana	AtPUT1	At1G31820
	AtPUT2	AtG31830
	AtPUT3	At5G05630
	AtPUT4	At3G13620
	AtPUT5	At3G19553
Oryza sativa	OsPUT1	AK068055
	OsPUT2	AK099986
	OsPUT3	AK071314

## Sheet: Table S3
Supplementary Table S3: Synteny analysis of PA transporter genes in H. vulgare with other plant species, A. thaliana, B. distachyon, O. sativa, and S. bicolor.
H. Vulgare		Name in barley			B. distachyon
chr5H	HORVU.MOREX.r3.5HG0439620.1	HvPUT2	==	4	transcript:KQJ86145
chr3H	HORVU.MOREX.r3.3HG0319360.1	HvBAT3	==	2	transcript:KQK11517
chr2H	HORVU.MOREX.r3.2HG0169290.1	HvBAT6	==	5	transcript:KQJ82693
chr6H	HORVU.MOREX.r3.6HG0606680.2	HvPUT1	==	3	transcript:PNT69273
H. Vulgare					O. Sativa
chr5H	HORVU.MOREX.r3.5HG0439620.1	HvPUT2	==	Chr12	LOC_Os12g39080.1.MSUR7
chr3H	HORVU.MOREX.r3.3HG0319360.1	HvBAT3	==	Chr1	LOC_Os01g71700.1.MSUR7
chr2H	HORVU.MOREX.r3.2HG0169290.1	HvBAT6	==	Chr4	LOC_Os04g35540.1.MSUR7
chr6H	HORVU.MOREX.r3.6HG0606680.2	HvPUT1	==	Chr2	LOC_Os02g47210.1.MSUR7
H. Vulgare					S. Bicolor
chr5H	HORVU.MOREX.r3.5HG0439620.1	HvPUT2	==	8	transcript:EES16229
chr3H	HORVU.MOREX.r3.3HG0319360.1	HvBAT3	==	3	transcript:EES04202
chr2H	HORVU.MOREX.r3.2HG0169290.1	HvBAT6	==	6	transcript:EES10834
chr6H	HORVU.MOREX.r3.6HG0606680.2	HvPUT1	==	4	transcript:OQU85562

## Sheet: Table S4
Supplementary Table S4: Cis-acting regulatory elements identified in the 1.5 kb upstream region of the barley PA transporter genes.
Gene name	Site Name	sequence	Position	Matrix score.	Strand	Organism	Function
HvPUT1	ABRE	ACGTG	59	5	-	Arabidopsis thaliana	cis-acting element involved in the abscisic acid responsiveness
HvPUT1	ABRE	CGTACGTGCA	964	9	+	Hordeum vulgare	cis-acting element involved in the abscisic acid responsiveness
HvPUT1	STRE	AGGGG	753	5	+	Arabidopsis thaliana
HvPUT1	GT1-motif	GGTTAAT	806	7	-	Avena sativa	light responsive element
HvPUT1	GT1-motif	GGTTAA	807	6	-	Arabidopsis thaliana	light responsive element
HvPUT1	GT1-motif	GGTTAA	1195	6	+	Arabidopsis thaliana	light responsive element
HvPUT1	GT1-motif	GGTTAA	1197	6	-	Arabidopsis thaliana	light responsive element
HvPUT1	MYB-like sequence	TAACCA	1047	6	-	Arabidopsis thaliana
HvPUT1	MYB	CAACCA	80	6	+	Arabidopsis thaliana
HvPUT1	MYB	CAACAG	972	6	+	Arabidopsis thaliana
HvPUT1	MYB	TAACCA	1047	6	-	Arabidopsis thaliana
HvPUT1		motif_sequence	126	4	+	organism	short_function
HvPUT1		motif_sequence	233	4	-	organism	short_function
HvPUT1		motif_sequence	258	4	-	organism	short_function
HvPUT1		motif_sequence	413	4	-	organism	short_function
HvPUT1		motif_sequence	530	4	+	organism	short_function
HvPUT1		motif_sequence	692	4	+	organism	short_function
HvPUT1		motif_sequence	1002	4	-	organism	short_function
HvPUT1		motif_sequence	1025	4	+	organism	short_function
HvPUT1		motif_sequence	1428	4	+	organism	short_function
HvPUT1	O2-site	GATGACATGG	103	9	-	Zea mays	cis-acting regulatory element involved in zein metabolism regulation
HvPUT1	O2-site	GATGA(C/T)(A/G)TG(A/G)	470	8	+	Zea mays	cis-acting regulatory element involved in zein metabolism regulation
HvPUT1	W box	TTGACC	1062	6	+	Arabidopsis thaliana
HvPUT1	MYC	CATGTG	1024	6	+	Arabidopsis thaliana
HvPUT1	MYC	CATTTG	1135	6	-	Arabidopsis thaliana
HvPUT1	MBS	CAACTG	1415	6	-	Arabidopsis thaliana	MYB binding site involved in drought-inducibility
HvPUT1	TATA-box	TATA	454	4	+	Arabidopsis thaliana	core promoter element around -30 of transcription start
HvPUT1	TATA-box	TATA	765	4	-	Arabidopsis thaliana	core promoter element around -30 of transcription start
HvPUT1	TATA-box	ATATAT	1009	6	-	Brassica napus	core promoter element around -30 of transcription start
HvPUT1	TATA-box	TATA	1010	4	-	Arabidopsis thaliana	core promoter element around -30 of transcription start
HvPUT1	TATA-box	ATTATA	1074	6	+	Brassica napus	core promoter element around -30 of transcription start
HvPUT1	TATA-box	TATAA	1075	5	-	Arabidopsis thaliana	core promoter element around -30 of transcription start
HvPUT1	TATA-box	TATA	1076	4	-	Arabidopsis thaliana	core promoter element around -30 of transcription start
HvPUT1	TATA-box	ATTATA	1124	6	+	Brassica napus	core promoter element around -30 of transcription start
HvPUT1	TATA-box	TATAA	1125	5	-	Arabidopsis thaliana	core promoter element around -30 of transcription start
HvPUT1	TATA-box	TATA	1126	4	-	Arabidopsis thaliana	core promoter element around -30 of transcription start
HvPUT1	TATA-box	TATAA	1162	5	-	Arabidopsis thaliana	core promoter element around -30 of transcription start
HvPUT1	TATA-box	TATA	1163	4	-	Arabidopsis thaliana	core promoter element around -30 of transcription start
HvPUT1	TATA-box	ATATAT	1218	6	-	Brassica napus	core promoter element around -30 of transcription start
HvPUT1	TATA-box	TATA	1219	4	-	Arabidopsis thaliana	core promoter element around -30 of transcription start
HvPUT1	TATA-box	ATATAA	1328	6	+	Brassica oleracea	core promoter element around -30 of transcription start
HvPUT1	TATA-box	TATA	1329	4	-	Arabidopsis thaliana	core promoter element around -30 of transcription start
HvPUT1	CAAT-box	CAAT	185	4	-	Nicotiana glutinosa
HvPUT1	CAAT-box	CCAAT	339	5	-	Arabidopsis thaliana	common cis-acting element in promoter and enhancer regions
HvPUT1	CAAT-box	CAAAT	617	5	-	Pisum sativum	common cis-acting element in promoter and enhancer regions
HvPUT1	CAAT-box	CAAT	633	4	+	Nicotiana glutinosa
HvPUT1	CAAT-box	CAAAT	648	5	-	Pisum sativum	common cis-acting element in promoter and enhancer regions
HvPUT1	CAAT-box	CAAAT	658	5	-	Pisum sativum	common cis-acting element in promoter and enhancer regions
HvPUT1	CAAT-box	CAAAT	667	5	+	Pisum sativum	common cis-acting element in promoter and enhancer regions
HvPUT1	CAAT-box	CAAAT	814	5	-	Pisum sativum	common cis-acting element in promoter and enhancer regions
HvPUT1	CAAT-box	CAAAT	826	5	-	Pisum sativum	common cis-acting element in promoter and enhancer regions
HvPUT1	CAAT-box	CCAAT	928	5	+	Arabidopsis thaliana	common cis-acting element in promoter and enhancer regions
HvPUT1	CAAT-box	CAAT	929	4	+	Nicotiana glutinosa
HvPUT1	CAAT-box	CAAT	1130	4	+	Nicotiana glutinosa
HvPUT1	CAAT-box	CAAAT	1135	5	+	Pisum sativum	common cis-acting element in promoter and enhancer regions
HvPUT1	CAAT-box	CAAT	1166	4	-	Nicotiana glutinosa
HvPUT1	CAAT-box	CAAT	1267	4	+	Nicotiana glutinosa
HvPUT1	CAAT-box	CAAT	1361	4	+	Nicotiana glutinosa
HvPUT1	CAAT-box	CAAAT	1373	5	+	Pisum sativum	common cis-acting element in promoter and enhancer regions
HvPUT1	CAAT-box	CCAAT	1409	5	+	Arabidopsis thaliana	common cis-acting element in promoter and enhancer regions
HvPUT1	CAAT-box	CAAT	1410	4	+	Nicotiana glutinosa
HvPUT1	TATC-box	TATCCCA	936	7	-	Oryza sativa	cis-acting element involved in gibberellin-responsiveness
HvPUT1	CCGTCC motif	CCGTCC	136	6	+	Nicotiana tabacum
HvPUT1	CCGTCC motif	CCGTCC	447	6	-	Nicotiana tabacum
HvPUT1	CCGTCC motif	CCGTCC	1479	6	-	Nicotiana tabacum
HvPUT1	TGA-element	AACGAC	144	6	+	Brassica oleracea	auxin-responsive element
HvPUT1	TGA-element	AACGAC	458	6	+	Brassica oleracea	auxin-responsive element
HvPUT1	TGA-element	AACGAC	604	6	+	Brassica oleracea	auxin-responsive element
HvPUT1	Unnamed__4	CTCC	6	4	-	Petroselinum hortense
HvPUT1	Unnamed__4	CTCC	13	4	-	Petroselinum hortense
HvPUT1	Unnamed__4	CTCC	67	4	+	Petroselinum hortense
HvPUT1	Unnamed__4	CTCC	101	4	+	Petroselinum hortense
HvPUT1	Unnamed__4	CTCC	149	4	+	Petroselinum hortense
HvPUT1	Unnamed__4	CTCC	155	4	-	Petroselinum hortense
HvPUT1	Unnamed__4	CTCC	285	4	-	Petroselinum hortense
HvPUT1	Unnamed__4	CTCC	288	4	-	Petroselinum hortense
HvPUT1	Unnamed__4	CTCC	291	4	-	Petroselinum hortense
HvPUT1	Unnamed__4	CTCC	324	4	-	Petroselinum hortense
HvPUT1	Unnamed__4	CTCC	380	4	+	Petroselinum hortense
HvPUT1	Unnamed__4	CTCC	1389	4	+	Petroselinum hortense
HvPUT1	ARE	AAACCA	784	6	+	Zea mays	cis-acting regulatory element essential for the anaerobic induction
HvPUT1	ARE	AAACCA	820	6	-	Zea mays	cis-acting regulatory element essential for the anaerobic induction
HvPUT1	ARE	AAACCA	832	6	-	Zea mays	cis-acting regulatory element essential for the anaerobic induction
HvPUT1	ARE	AAACCA	925	6	+	Zea mays	cis-acting regulatory element essential for the anaerobic induction
HvPUT1	ARE	AAACCA	1186	6	-	Zea mays	cis-acting regulatory element essential for the anaerobic induction
HvPUT1	ARE	AAACCA	1284	6	+	Zea mays	cis-acting regulatory element essential for the anaerobic induction
HvPUT1	CAT-box	GCCACT	209	6	+	Arabidopsis thaliana	cis-acting regulatory element related to meristem expression
HvPUT1	Unnamed__16	GCTGCCCGTC	247	9	-	Zea mays
HvPUT1	LTR	CCGAAA	772	6	+	Hordeum vulgare	cis-acting element involved in low-temperature responsiveness
HvPUT1	LTR	CCGAAA	779	6	+	Hordeum vulgare	cis-acting element involved in low-temperature responsiveness
HvPUT1	LTR	CCGAAA	1191	6	-	Hordeum vulgare	cis-acting element involved in low-temperature responsiveness
HvPUT1	Sp1	GGGCGG	250	6	+	Oryza sativa	light responsive element
HvPUT1	A-box	CCGTCC	136	6	+	Petroselinum crispum	cis-acting regulatory element
HvPUT1	A-box	CCGTCC	447	6	-	Petroselinum crispum	cis-acting regulatory element
HvPUT1	A-box	CCGTCC	1479	6	-	Petroselinum crispum	cis-acting regulatory element
HvPUT1	Box 4	ATTAAT	1228	6	-	Petroselinum crispum	part of a conserved DNA module involved in light responsiveness
HvPUT1	Box 4	ATTAAT	1321	6	-	Petroselinum crispum	part of a conserved DNA module involved in light responsiveness
HvPUT1	CCGTCC-box	CCGTCC	136	6	+	Petroselinum hortense
HvPUT1	CCGTCC-box	CCGTCC	447	6	-	Petroselinum hortense
HvPUT1	CCGTCC-box	CCGTCC	1479	6	-	Petroselinum hortense
HvPUT1	G-Box	CACGTT	59	6	+	Pisum sativum	cis-acting regulatory element involved in light responsiveness
HvPUT1	Unnamed__1	CGTGG	26	5	+	Zea mays
HvPUT1	Unnamed__1	CGTGG	588	5	-	Zea mays
HvPUT1	Myc	TCTCTTA	195	7	-	Arabidopsis thaliana
HvPUT1	Myb-binding site	CAACAG	972	6	+	Nicotiana tabacum
HvPUT1	Myb	TAACTG	480	6	+	Arabidopsis thaliana
HvPUT1	Myb	CAACTG	1415	6	-	Arabidopsis thaliana
HvPUT1	ERE	ATTTTAAA	1250	8	+	Nicotiana glutinos
HvPUT2	TATA-box	ATATAA	17	6	+	Brassica oleracea	core promoter element around -30 of transcription start
HvPUT2	TATA-box	TATA	18	4	+	Arabidopsis thaliana	core promoter element around -30 of transcription start
HvPUT2	TATA-box	ATTATA	22	6	+	Brassica napus	core promoter element around -30 of transcription start
HvPUT2	TATA-box	TATAA	23	5	-	Arabidopsis thaliana	core promoter element around -30 of transcription start
HvPUT2	TATA-box	TATA	24	4	+	Arabidopsis thaliana	core promoter element around -30 of transcription start
HvPUT2	TATA-box	TATA	176	4	+	Arabidopsis thaliana	core promoter element around -30 of transcription start
HvPUT2	TATA-box	TATAA	238	5	-	Arabidopsis thaliana	core promoter element around -30 of transcription start
HvPUT2	TATA-box	TATA	239	4	+	Arabidopsis thaliana	core promoter element around -30 of transcription start
HvPUT2	TATA-box	ATTATA	242	6	+	Brassica napus	core promoter element around -30 of transcription start
HvPUT2	TATA-box	TATAA	243	5	-	Arabidopsis thaliana	core promoter element around -30 of transcription start
HvPUT2	TATA-box	TATA	244	4	+	Arabidopsis thaliana	core promoter element around -30 of transcription start
HvPUT2	TATA-box	taTATAAAtc	248	9	-	Arabidopsis thaliana	core promoter element around -30 of transcription start
HvPUT2	TATA-box	TATAAAA	251	7	-	Pisum sativum	core promoter element around -30 of transcription start
HvPUT2	TATA-box	TATAAA	252	6	-	Helianthus annuus	core promoter element around -30 of transcription start
HvPUT2	TATA-box	TATAA	253	5	-	Arabidopsis thaliana	core promoter element around -30 of transcription start
HvPUT2	TATA-box	TATA	254	4	+	Arabidopsis thaliana	core promoter element around -30 of transcription start
HvPUT2	TATA-box	TATATAA	273	7	-	Arabidopsis thaliana	core promoter element around -30 of transcription start
HvPUT2	TATA-box	TATATA	274	6	+	Arabidopsis thaliana	core promoter element around -30 of transcription start
HvPUT2	TATA-box	ATATAA	275	6	+	Brassica oleracea	core promoter element around -30 of transcription start
HvPUT2	TATA-box	TATA	276	4	+	Arabidopsis thaliana	core promoter element around -30 of transcription start
HvPUT2	TATA-box	TATA	310	4	+	Arabidopsis thaliana	core promoter element around -30 of transcription start
HvPUT2	TATA-box	TATAA	390	5	-	Arabidopsis thaliana	core promoter element around -30 of transcription start
HvPUT2	TATA-box	TATA	391	4	+	Arabidopsis thaliana	core promoter element around -30 of transcription start
HvPUT2	TATA-box	TATAAAT	633	7	-	Brassica juncea	core promoter element around -30 of transcription start
HvPUT2	TATA-box	TATAAA	634	6	-	Helianthus annuus	core promoter element around -30 of transcription start
HvPUT2	TATA-box	TATAA	635	5	-	Arabidopsis thaliana	core promoter element around -30 of transcription start
HvPUT2	TATA-box	TATA	636	4	+	Arabidopsis thaliana	core promoter element around -30 of transcription start
HvPUT2	TATA-box	TATACA	672	6	-	Helianthus annuus	core promoter element around -30 of transcription start
HvPUT2	TATA-box	TATA	674	4	+	Arabidopsis thaliana	core promoter element around -30 of transcription start
HvPUT2	TATA-box	TATA	793	4	-	Arabidopsis thaliana	core promoter element around -30 of transcription start
HvPUT2	TATA-box	ATTATA	1249	6	+	Brassica napus	core promoter element around -30 of transcription start
HvPUT2	TATA-box	TATAA	1250	5	-	Arabidopsis thaliana	core promoter element around -30 of transcription start
HvPUT2	TATA-box	TATA	1251	4	-	Arabidopsis thaliana	core promoter element around -30 of transcription start
HvPUT2	TATA-box	TATA	1264	4	-	Arabidopsis thaliana	core promoter element around -30 of transcription start
HvPUT2	TATA-box	TACAAAA	1299	7	-	Oryza sativa	core promoter element around -30 of transcription start
HvPUT2	TATA-box	TATAA	1330	5	-	Arabidopsis thaliana	core promoter element around -30 of transcription start
HvPUT2	TATA-box	TATA	1331	4	-	Arabidopsis thaliana	core promoter element around -30 of transcription start
HvPUT2	CAAT-box	CAAT	163	4	+	Nicotiana glutinosa
HvPUT2	CAAT-box	CAAAT	228	5	+	Pisum sativum	common cis-acting element in promoter and enhancer regions
HvPUT2	CAAT-box	CAAAT	263	5	+	Pisum sativum	common cis-acting element in promoter and enhancer regions
HvPUT2	CAAT-box	CAAT	295	4	-	Nicotiana glutinosa
HvPUT2	CAAT-box	CAAAT	320	5	+	Pisum sativum	common cis-acting element in promoter and enhancer regions
HvPUT2	CAAT-box	CAAT	330	4	+	Nicotiana glutinosa
HvPUT2	CAAT-box	CAAAT	335	5	-	Pisum sativum	common cis-acting element in promoter and enhancer regions
HvPUT2	CAAT-box	CAAAT	344	5	-	Pisum sativum	common cis-acting element in promoter and enhancer regions
HvPUT2	CAAT-box	CAAT	532	4	+	Nicotiana glutinosa
HvPUT2	CAAT-box	CAAT	538	4	-	Nicotiana glutinosa
HvPUT2	CAAT-box	CAAT	542	4	+	Nicotiana glutinosa
HvPUT2	CAAT-box	CAAT	585	4	-	Nicotiana glutinosa
HvPUT2	CAAT-box	CAAT	607	4	+	Nicotiana glutinosa
HvPUT2	CAAT-box	CAAT	614	4	-	Nicotiana glutinosa
HvPUT2	CAAT-box	CAAT	625	4	-	Nicotiana glutinosa
HvPUT2	CAAT-box	CAAT	631	4	+	Nicotiana glutinosa
HvPUT2	CAAT-box	CAAT	844	4	+	Nicotiana glutinosa
HvPUT2	CAAT-box	CAAAT	846	5	-	Pisum sativum	common cis-acting element in promoter and enhancer regions
HvPUT2	CAAT-box	CCAAT	903	5	+	Arabidopsis thaliana	common cis-acting element in promoter and enhancer regions
HvPUT2	CAAT-box	CAAT	904	4	+	Nicotiana glutinosa
HvPUT2	CAAT-box	CAAAT	1101	5	+	Pisum sativum	common cis-acting element in promoter and enhancer regions
HvPUT2	CAAT-box	CAAAT	1104	5	-	Pisum sativum	common cis-acting element in promoter and enhancer regions
HvPUT2	CAAT-box	CAAT	1115	4	+	Nicotiana glutinosa
HvPUT2	CAAT-box	CAAAT	1260	5	+	Pisum sativum	common cis-acting element in promoter and enhancer regions
HvPUT2	CAAT-box	CAAAT	1283	5	+	Pisum sativum	common cis-acting element in promoter and enhancer regions
HvPUT2	CAAT-box	CAAT	1326	4	-	Nicotiana glutinosa
HvPUT2	CAAT-box	CAAT	1350	4	+	Nicotiana glutinosa
HvPUT2	CAAT-box	CAAAT	1459	5	+	Pisum sativum	common cis-acting element in promoter and enhancer regions
HvPUT2	AT~TATA-box	TATATA	274	6	+	Arabidopsis thaliana
HvPUT2	ABRE3a	TACGTG	157	6	+	Zea mays
HvPUT2	MYC	CATTTG	228	6	-	Arabidopsis thaliana
HvPUT2	MYC	CATTTG	263	6	-	Arabidopsis thaliana
HvPUT2	MYC	CATTTG	343	6	+	Arabidopsis thaliana
HvPUT2	MBS	CAACTG	738	6	-	Arabidopsis thaliana	MYB binding site involved in drought-inducibility
HvPUT2	Unnamed__6	taTAAATATct	247	10	-	Zea mays
HvPUT2	as-1	TGACG	616	5	+	Arabidopsis thaliana
HvPUT2	as-1	TGACG	1109	5	-	Arabidopsis thaliana
HvPUT2	as-1	TGACG	1215	5	+	Arabidopsis thaliana
HvPUT2	TGACG-motif	TGACG	616	5	+	Hordeum vulgare	cis-acting regulatory element involved in the MeJA-responsiveness
HvPUT2	TGACG-motif	TGACG	1109	5	-	Hordeum vulgare	cis-acting regulatory element involved in the MeJA-responsiveness
HvPUT2	TGACG-motif	TGACG	1215	5	+	Hordeum vulgare	cis-acting regulatory element involved in the MeJA-responsiveness
HvPUT2	TGA-element	AACGAC	1044	6	+	Brassica oleracea	auxin-responsive element
HvPUT2	Unnamed__4	CTCC	282	4	-	Petroselinum hortense
HvPUT2	Unnamed__4	CTCC	290	4	-	Petroselinum hortense
HvPUT2	Unnamed__4	CTCC	433	4	+	Petroselinum hortense
HvPUT2	Unnamed__4	CTCC	651	4	+	Petroselinum hortense
HvPUT2	Unnamed__4	CTCC	798	4	+	Petroselinum hortense
HvPUT2	Unnamed__4	CTCC	949	4	-	Petroselinum hortense
HvPUT2	Unnamed__4	CTCC	1174	4	+	Petroselinum hortense
HvPUT2	Unnamed__4	CTCC	1208	4	-	Petroselinum hortense
HvPUT2	Unnamed__4	CTCC	1477	4	+	Petroselinum hortense
HvPUT2	DRE core	GCCGAC	807	6	+	Arabidopsis thaliana
HvPUT2	MYB	CAACCA	376	6	+	Arabidopsis thaliana
HvPUT2	MYB	CAACCA	1227	6	-	Arabidopsis thaliana
HvPUT2	ABRE	ACGTG	158	5	+	Arabidopsis thaliana	cis-acting element involved in the abscisic acid responsiveness
HvPUT2	ABRE	CGCACGTGTC	452	9	-	Hordeum vulgare	cis-acting element involved in the abscisic acid responsiveness
HvPUT2	ABRE	CACGTG	454	6	+	Arabidopsis thaliana	cis-acting element involved in the abscisic acid responsiveness
HvPUT2	ABRE	ACGTG	455	5	+	Arabidopsis thaliana	cis-acting element involved in the abscisic acid responsiveness
HvPUT2	ABRE	ACGTG	618	5	+	Arabidopsis thaliana	cis-acting element involved in the abscisic acid responsiveness
HvPUT2	ABRE	CGCACGTGTC	1389	9	-	Hordeum vulgare	cis-acting element involved in the abscisic acid responsiveness
HvPUT2	ABRE	CACGTG	1391	6	-	Arabidopsis thaliana	cis-acting element involved in the abscisic acid responsiveness
HvPUT2	ABRE	ACGTG	1392	5	+	Arabidopsis thaliana	cis-acting element involved in the abscisic acid responsiveness
HvPUT2	TCT-motif	TCTTAC	1290	6	-	Arabidopsis thaliana	part of a light responsive element
HvPUT2	TCT-motif	TCTTAC	1303	6	-	Arabidopsis thaliana	part of a light responsive element
HvPUT2	STRE	AGGGG	234	5	-	Arabidopsis thaliana
HvPUT2	CGTCA-motif	CGTCA	616	5	-	Hordeum vulgare	cis-acting regulatory element involved in the MeJA-responsiveness
HvPUT2	CGTCA-motif	CGTCA	1109	5	+	Hordeum vulgare	cis-acting regulatory element involved in the MeJA-responsiveness
HvPUT2	CGTCA-motif	CGTCA	1215	5	-	Hordeum vulgare	cis-acting regulatory element involved in the MeJA-responsiveness
HvPUT2	W box	TTGACC	198	6	-	Arabidopsis thaliana
HvPUT2	GCN4_motif	TGAGTCA	338	7	-	Oryza sativa	cis-regulatory element involved in endosperm expression
HvPUT2		motif_sequence	119	4	-	organism	short_function
HvPUT2		motif_sequence	142	4	+	organism	short_function
HvPUT2		motif_sequence	150	4	-	organism	short_function
HvPUT2		motif_sequence	171	4	-	organism	short_function
HvPUT2		motif_sequence	484	4	+	organism	short_function
HvPUT2		motif_sequence	949	4	-	organism	short_function
HvPUT2		motif_sequence	967	4	+	organism	short_function
HvPUT2		motif_sequence	1475	4	+	organism	short_function
HvPUT2	O2-site	GTTGACGTGA	614	9	+	Zea mays	cis-acting regulatory element involved in zein metabolism regulation
HvPUT2	Myb	CAACTG	738	6	-	Arabidopsis thaliana
HvPUT2	Myb	TAACTG	891	6	-	Arabidopsis thaliana
HvPUT2	Myb	TAACTG	1408	6	+	Arabidopsis thaliana
HvPUT2	G-box	TACGTG	157	6	+	Arabidopsis thaliana	cis-acting regulatory element involved in light responsiveness
HvPUT2	G-box	CACGTG	454	6	+	Arabidopsis thaliana	cis-acting regulatory element involved in light responsiveness
HvPUT2	G-box	CACGTC	617	6	-	Zea mays	cis-acting regulatory element involved in light responsiveness
HvPUT2	G-box	CACGTG	1391	6	-	Arabidopsis thaliana	cis-acting regulatory element involved in light responsiveness
HvPUT2	GA-motif	ATAGATAA	25	8	+	Arabidopsis thaliana	part of a light responsive element
HvPUT2	WRE3	CCACCT	1004	6	-	Pisum sativum
HvPUT2	G-Box	CACGTG	454	6	+	Pisum sativum	cis-acting regulatory element involved in light responsiveness
HvPUT2	G-Box	CACGTG	1391	6	-	Pisum sativum	cis-acting regulatory element involved in light responsiveness
HvPUT2	AC-I	(T/C)C(T/C)(C/T)ACC(T/C)ACC	1001	2023-05-08	-	Phaseolus vulgaris
HvPUT2	AC-I	(T/C)C(T/C)(C/T)ACC(T/C)ACC	1005	2023-05-08	-	Phaseolus vulgaris
HvPUT2	ABRE4	CACGTA	157	6	-	Zea mays
HvPUT3	TGA-element	AACGAC	227	6	+	Brassica oleracea	auxin-responsive element
HvPUT3	TGA-element	AACGAC	982	6	+	Brassica oleracea	auxin-responsive element
HvPUT3	TGA-element	AACGAC	1019	6	+	Brassica oleracea	auxin-responsive element
HvPUT3	CCGTCC motif	CCGTCC	996	6	-	Nicotiana tabacum
HvPUT3	ARE	AAACCA	53	6	-	Zea mays	cis-acting regulatory element essential for the anaerobic induction
HvPUT3	Unnamed__4	CTCC	93	4	-	Petroselinum hortense
HvPUT3	Unnamed__4	CTCC	97	4	-	Petroselinum hortense
HvPUT3	Unnamed__4	CTCC	121	4	-	Petroselinum hortense
HvPUT3	Unnamed__4	CTCC	366	4	+	Petroselinum hortense
HvPUT3	Unnamed__4	CTCC	546	4	+	Petroselinum hortense
HvPUT3	Unnamed__4	CTCC	573	4	+	Petroselinum hortense
HvPUT3	Unnamed__4	CTCC	605	4	+	Petroselinum hortense
HvPUT3	Unnamed__4	CTCC	657	4	+	Petroselinum hortense
HvPUT3	Unnamed__4	CTCC	775	4	+	Petroselinum hortense
HvPUT3	Unnamed__4	CTCC	810	4	+	Petroselinum hortense
HvPUT3	Unnamed__4	CTCC	853	4	-	Petroselinum hortense
HvPUT3	Unnamed__4	CTCC	1000	4	-	Petroselinum hortense
HvPUT3	Unnamed__4	CTCC	1153	4	-	Petroselinum hortense
HvPUT3	Unnamed__4	CTCC	1195	4	-	Petroselinum hortense
HvPUT3	Unnamed__4	CTCC	1260	4	-	Petroselinum hortense
HvPUT3	Unnamed__4	CTCC	1326	4	+	Petroselinum hortense
HvPUT3	Unnamed__4	CTCC	1330	4	-	Petroselinum hortense
HvPUT3	Unnamed__4	CTCC	1340	4	-	Petroselinum hortense
HvPUT3	Unnamed__4	CTCC	1407	4	+	Petroselinum hortense
HvPUT3	TCCC-motif	TCTCCCT	95	7	-	Spinacia oleracea	part of a light responsive element
HvPUT3	ABRE3a	TACGTG	1177	6	+	Zea mays
HvPUT3	MBS	CAACTG	291	6	+	Arabidopsis thaliana	MYB binding site involved in drought-inducibility
HvPUT3	MYC	CATGTG	74	6	+	Arabidopsis thaliana
HvPUT3	MYC	CATGTG	758	6	+	Arabidopsis thaliana
HvPUT3	MYC	CAATTG	1384	6	-	Arabidopsis thaliana
HvPUT3	TGACG-motif	TGACG	159	5	-	Hordeum vulgare	cis-acting regulatory element involved in the MeJA-responsiveness
HvPUT3	TGACG-motif	TGACG	344	5	+	Hordeum vulgare	cis-acting regulatory element involved in the MeJA-responsiveness
HvPUT3	TGACG-motif	TGACG	413	5	+	Hordeum vulgare	cis-acting regulatory element involved in the MeJA-responsiveness
HvPUT3	TGACG-motif	TGACG	457	5	-	Hordeum vulgare	cis-acting regulatory element involved in the MeJA-responsiveness
HvPUT3	TGACG-motif	TGACG	609	5	-	Hordeum vulgare	cis-acting regulatory element involved in the MeJA-responsiveness
HvPUT3	TGACG-motif	TGACG	724	5	+	Hordeum vulgare	cis-acting regulatory element involved in the MeJA-responsiveness
HvPUT3	TGACG-motif	TGACG	1381	5	-	Hordeum vulgare	cis-acting regulatory element involved in the MeJA-responsiveness
HvPUT3	as-1	TGACG	159	5	-	Arabidopsis thaliana
HvPUT3	as-1	TGACG	344	5	+	Arabidopsis thaliana
HvPUT3	as-1	TGACG	413	5	+	Arabidopsis thaliana
HvPUT3	as-1	TGACG	457	5	-	Arabidopsis thaliana
HvPUT3	as-1	TGACG	609	5	-	Arabidopsis thaliana
HvPUT3	as-1	TGACG	724	5	+	Arabidopsis thaliana
HvPUT3	as-1	TGACG	1381	5	-	Arabidopsis thaliana
HvPUT3	TATA-box	ccTATAAAaa	191	9	+	Arabidopsis thaliana	core promoter element around -30 of transcription start
HvPUT3	TATA-box	TATA	193	4	+	Arabidopsis thaliana	core promoter element around -30 of transcription start
HvPUT3	TATA-box	TATA	463	4	+	Arabidopsis thaliana	core promoter element around -30 of transcription start
HvPUT3	TATA-box	ATATAA	1285	6	+	Brassica oleracea	core promoter element around -30 of transcription start
HvPUT3	TATA-box	TATA	1286	4	-	Arabidopsis thaliana	core promoter element around -30 of transcription start
HvPUT3	TATA-box	TATA	1415	4	-	Arabidopsis thaliana	core promoter element around -30 of transcription start
HvPUT3	CAAT-box	CAAT	8	4	-	Nicotiana glutinosa
HvPUT3	CAAT-box	CAAT	26	4	-	Nicotiana glutinosa
HvPUT3	CAAT-box	CAAT	116	4	+	Nicotiana glutinosa
HvPUT3	CAAT-box	CAAT	152	4	-	Nicotiana glutinosa
HvPUT3	CAAT-box	CAAAT	282	5	+	Pisum sativum	common cis-acting element in promoter and enhancer regions
HvPUT3	CAAT-box	CAAT	334	4	-	Nicotiana glutinosa
HvPUT3	CAAT-box	CAAT	452	4	-	Nicotiana glutinosa
HvPUT3	CAAT-box	CAAT	486	4	+	Nicotiana glutinosa
HvPUT3	CAAT-box	CAAT	649	4	+	Nicotiana glutinosa
HvPUT3	CAAT-box	CAAT	700	4	-	Nicotiana glutinosa
HvPUT3	CAAT-box	CAAAT	746	5	+	Pisum sativum	common cis-acting element in promoter and enhancer regions
HvPUT3	CAAT-box	CAAT	1049	4	-	Nicotiana glutinosa
HvPUT3	CAAT-box	CAAT	1074	4	-	Nicotiana glutinosa
HvPUT3	CAAT-box	CAAT	1384	4	+	Nicotiana glutinosa
HvPUT3	CAAT-box	CAAT	1386	4	-	Nicotiana glutinosa
HvPUT3		motif_sequence	38	4	-	organism	short_function
HvPUT3		motif_sequence	130	4	-	organism	short_function
HvPUT3		motif_sequence	379	4	+	organism	short_function
HvPUT3		motif_sequence	696	4	-	organism	short_function
HvPUT3		motif_sequence	712	4	+	organism	short_function
HvPUT3		motif_sequence	773	4	+	organism	short_function
HvPUT3		motif_sequence	853	4	-	organism	short_function
HvPUT3		motif_sequence	1042	4	-	organism	short_function
HvPUT3		motif_sequence	1100	4	-	organism	short_function
HvPUT3		motif_sequence	1112	4	-	organism	short_function
HvPUT3		motif_sequence	1174	4	+	organism	short_function
HvPUT3		motif_sequence	1187	4	-	organism	short_function
HvPUT3		motif_sequence	1393	4	-	organism	short_function
HvPUT3		motif_sequence	1405	4	+	organism	short_function
HvPUT3		motif_sequence	1432	4	+	organism	short_function
HvPUT3	GC-motif	CCCCCG	368	6	+	Zea mays	enhancer-like element involved in anoxic specific inducibility
HvPUT3	O2-site	GATGA(C/T)(A/G)TG(A/G)	674	8	+	Zea mays	cis-acting regulatory element involved in zein metabolism regulation
HvPUT3	CGTCA-motif	CGTCA	159	5	+	Hordeum vulgare	cis-acting regulatory element involved in the MeJA-responsiveness
HvPUT3	CGTCA-motif	CGTCA	344	5	-	Hordeum vulgare	cis-acting regulatory element involved in the MeJA-responsiveness
HvPUT3	CGTCA-motif	CGTCA	413	5	-	Hordeum vulgare	cis-acting regulatory element involved in the MeJA-responsiveness
HvPUT3	CGTCA-motif	CGTCA	457	5	+	Hordeum vulgare	cis-acting regulatory element involved in the MeJA-responsiveness
HvPUT3	CGTCA-motif	CGTCA	609	5	+	Hordeum vulgare	cis-acting regulatory element involved in the MeJA-responsiveness
HvPUT3	CGTCA-motif	CGTCA	724	5	-	Hordeum vulgare	cis-acting regulatory element involved in the MeJA-responsiveness
HvPUT3	CGTCA-motif	CGTCA	1381	5	+	Hordeum vulgare	cis-acting regulatory element involved in the MeJA-responsiveness
HvPUT3	ABRE	ACGTG	1178	5	+	Arabidopsis thaliana	cis-acting element involved in the abscisic acid responsiveness
HvPUT3	TCT-motif	TCTTAC	1127	6	-	Arabidopsis thaliana	part of a light responsive element
HvPUT3	STRE	AGGGG	80	5	+	Arabidopsis thaliana
HvPUT3	STRE	AGGGG	1067	5	-	Arabidopsis thaliana
HvPUT3	STRE	AGGGG	1138	5	+	Arabidopsis thaliana
HvPUT3	STRE	AGGGG	1337	5	+	Arabidopsis thaliana
HvPUT3	MYB recognition site	CCGTTG	1442	6	-	Arabidopsis thaliana
HvPUT3	DRE core	GCCGAC	582	6	+	Arabidopsis thaliana
HvPUT3	DRE core	GCCGAC	668	6	+	Arabidopsis thaliana
HvPUT3	DRE core	GCCGAC	1094	6	+	Arabidopsis thaliana
HvPUT3	MYB	CAACCA	287	6	+	Arabidopsis thaliana
HvPUT3	Myb	CAACTG	291	6	+	Arabidopsis thaliana
HvPUT3	ABRE4	CACGTA	1177	6	-	Zea mays
HvPUT3	CCAAT-box	CAACGG	1442	6	+	Hordeum vulgare	MYBHv1 binding site
HvPUT3	TCA	TCATCTTCAT	1469	9	+	Pisum sativum
HvPUT3	Unnamed__1	CGTGG	435	5	+	Zea mays
HvPUT3	Unnamed__1	CGTGG	780	5	-	Zea mays
HvPUT3	Unnamed__1	CGTGG	1080	5	+	Zea mays
HvPUT3	Unnamed__1	CGTGG	1234	5	+	Zea mays
HvPUT3	CAT-box	GCCACT	1163	6	-	Arabidopsis thaliana	cis-acting regulatory element related to meristem expression
HvPUT3	LTR	CCGAAA	1454	6	-	Hordeum vulgare	cis-acting element involved in low-temperature responsiveness
HvPUT3	DRE	TACCGACAT	1225	9	+	Arabidopsis thaliana	cis-acting element involved in dehydration, low-temp, salt stresses HvPUT3 Sp1 GGGCGG 270 6 + Oryza sativa light responsive element HvPUT3 G-box TACGTG 1177 6 + Arabidopsis thaliana cis-acting regulatory element involved in light responsiveness HvPUT3 CARE CAACTCCC 602 8 + Oryza sativa HvPUT3 CARE CAACTCCC 807 8 + Oryza sativa HvPUT3 Box 4 ATTAAT 249 6 + Petroselinum crispum part of a conserved D…
HvPUT3	Sp1	GGGCGG	270	6	+	Oryza sativa	light responsive element
HvPUT3	G-box	TACGTG	1177	6	+	Arabidopsis thaliana	cis-acting regulatory element involved in light responsiveness
HvPUT3	CARE	CAACTCCC	602	8	+	Oryza sativa
HvPUT3	CARE	CAACTCCC	807	8	+	Oryza sativa
HvPUT3	Box 4	ATTAAT	249	6	+	Petroselinum crispum	part of a conserved DNA module involved in light responsiveness
HvPUT3	CCGTCC-box	CCGTCC	996	6	-	Petroselinum hortense
HvPUT3	A-box	CCGTCC	996	6	-	Petroselinum crispum	cis-acting regulatory element
HvPUT4	GATA-motif	AAGATAAGATT	435	10	-	Arabidopsis thaliana	part of a light responsive element
HvPUT4	ARE	AAACCA	243	6	+	Zea mays	cis-acting regulatory element essential for the anaerobic induction
HvPUT4	Unnamed__4	CTCC	13	4	+	Petroselinum hortense
HvPUT4	Unnamed__4	CTCC	47	4	+	Petroselinum hortense
HvPUT4	Unnamed__4	CTCC	52	4	+	Petroselinum hortense
HvPUT4	Unnamed__4	CTCC	66	4	+	Petroselinum hortense
HvPUT4	Unnamed__4	CTCC	146	4	+	Petroselinum hortense
HvPUT4	Unnamed__4	CTCC	1004	4	-	Petroselinum hortense
HvPUT4	Unnamed__4	CTCC	1155	4	-	Petroselinum hortense
HvPUT4	Unnamed__4	CTCC	1170	4	+	Petroselinum hortense
HvPUT4	Unnamed__4	CTCC	1379	4	+	Petroselinum hortense
HvPUT4	Unnamed__4	CTCC	1426	4	+	Petroselinum hortense
HvPUT4	TGA-element	AACGAC	22	6	+	Brassica oleracea	auxin-responsive element
HvPUT4	DRE1	ACCGAGA	1473	7	-	Zea mays
HvPUT4	MYC	CATTTG	220	6	-	Arabidopsis thaliana
HvPUT4	MYC	CATTTG	315	6	+	Arabidopsis thaliana
HvPUT4	MYC	CATTTG	1009	6	-	Arabidopsis thaliana
HvPUT4	MBS	CAACTG	1328	6	+	Arabidopsis thaliana	MYB binding site involved in drought-inducibility
HvPUT4	TGACG-motif	TGACG	1151	5	+	Hordeum vulgare	cis-acting regulatory element involved in the MeJA-responsiveness
HvPUT4	as-1	TGACG	1151	5	+	Arabidopsis thaliana
HvPUT4	TC-rich repeats	ATTCTCTAAC	1127	9	-	Nicotiana tabacum	cis-acting element involved in defense and stress responsiveness
HvPUT4	TATA-box	TATATAA	88	7	-	Arabidopsis thaliana	core promoter element around -30 of transcription start
HvPUT4	TATA-box	TATATA	89	6	+	Arabidopsis thaliana	core promoter element around -30 of transcription start
HvPUT4	TATA-box	ATATAT	90	6	+	Brassica napus	core promoter element around -30 of transcription start
HvPUT4	TATA-box	TATA	91	4	+	Arabidopsis thaliana	core promoter element around -30 of transcription start
HvPUT4	TATA-box	ATATAT	136	6	+	Brassica napus	core promoter element around -30 of transcription start
HvPUT4	TATA-box	TATA	137	4	+	Arabidopsis thaliana	core promoter element around -30 of transcription start
HvPUT4	TATA-box	ATATAA	199	6	+	Brassica oleracea	core promoter element around -30 of transcription start
HvPUT4	TATA-box	TATA	200	4	+	Arabidopsis thaliana	core promoter element around -30 of transcription start
HvPUT4	TATA-box	TACAAAA	268	7	-	Oryza sativa	core promoter element around -30 of transcription start
HvPUT4	TATA-box	TATATA	302	6	+	Arabidopsis thaliana	core promoter element around -30 of transcription start
HvPUT4	TATA-box	ATATAT	303	6	+	Brassica napus	core promoter element around -30 of transcription start
HvPUT4	TATA-box	TATA	304	4	+	Arabidopsis thaliana	core promoter element around -30 of transcription start
HvPUT4	TATA-box	ccTATAAAaa	427	9	+	Arabidopsis thaliana	core promoter element around -30 of transcription start
HvPUT4	TATA-box	TACAAAA	456	7	-	Oryza sativa	core promoter element around -30 of transcription start
HvPUT4	TATA-box	TACAAAA	734	7	+	Oryza sativa	core promoter element around -30 of transcription start
HvPUT4	CAAT-box	CAAAT	125	5	-	Pisum sativum	common cis-acting element in promoter and enhancer regions
HvPUT4	CAAT-box	CAAT	134	4	+	Nicotiana glutinosa
HvPUT4	CAAT-box	CAAT	190	4	-	Nicotiana glutinosa
HvPUT4	CAAT-box	CAAAT	220	5	+	Pisum sativum	common cis-acting element in promoter and enhancer regions
HvPUT4	CAAT-box	CAAT	284	4	-	Nicotiana glutinosa
HvPUT4	CAAT-box	CAAAT	316	5	-	Pisum sativum	common cis-acting element in promoter and enhancer regions
HvPUT4	CAAT-box	CAAT	384	4	-	Nicotiana glutinosa
HvPUT4	CAAT-box	CAAT	451	4	+	Nicotiana glutinosa
HvPUT4	CAAT-box	CAAT	650	4	-	Nicotiana glutinosa
HvPUT4	CAAT-box	CAAAT	657	5	+	Pisum sativum	common cis-acting element in promoter and enhancer regions
HvPUT4	CAAT-box	CAAT	754	4	-	Nicotiana glutinosa
HvPUT4	CAAT-box	CCAAT	828	5	-	Arabidopsis thaliana	common cis-acting element in promoter and enhancer regions
HvPUT4	CAAT-box	CCAAT	834	5	+	Arabidopsis thaliana	common cis-acting element in promoter and enhancer regions
HvPUT4	CAAT-box	CAAT	835	4	+	Nicotiana glutinosa
HvPUT4	CAAT-box	CAAAT	928	5	-	Pisum sativum	common cis-acting element in promoter and enhancer regions
HvPUT4	CAAT-box	CAAAT	989	5	+	Pisum sativum	common cis-acting element in promoter and enhancer regions
HvPUT4	CAAT-box	CAAT	995	4	-	Nicotiana glutinosa
HvPUT4	CAAT-box	CAAAT	1009	5	+	Pisum sativum	common cis-acting element in promoter and enhancer regions
HvPUT4	CAAT-box	CCAAT	1015	5	-	Arabidopsis thaliana	common cis-acting element in promoter and enhancer regions
HvPUT4	CAAT-box	CAAT	1033	4	-	Nicotiana glutinosa
HvPUT4	CAAT-box	CAAT	1038	4	+	Nicotiana glutinosa
HvPUT4	CAAT-box	TGCCAAC	1325	7	+	Petunia hybrida	common cis-acting element in promoter and enhancer regions
HvPUT4	AT~TATA-box	TATATA	89	6	+	Arabidopsis thaliana
HvPUT4	AT~TATA-box	TATATA	302	6	+	Arabidopsis thaliana
HvPUT4		motif_sequence	64	4	+	organism	short_function
HvPUT4		motif_sequence	72	4	-	organism	short_function
HvPUT4		motif_sequence	80	4	+	organism	short_function
HvPUT4		motif_sequence	144	4	+	organism	short_function
HvPUT4		motif_sequence	204	4	+	organism	short_function
HvPUT4		motif_sequence	441	4	+	organism	short_function
HvPUT4		motif_sequence	482	4	-	organism	short_function
HvPUT4		motif_sequence	527	4	+	organism	short_function
HvPUT4		motif_sequence	561	4	+	organism	short_function
HvPUT4		motif_sequence	972	4	+	organism	short_function
HvPUT4		motif_sequence	1155	4	-	organism	short_function
HvPUT4		motif_sequence	1226	4	+	organism	short_function
HvPUT4		motif_sequence	1261	4	-	organism	short_function
HvPUT4	GC-motif	CCCCCG	328	6	+	Zea mays	enhancer-like element involved in anoxic specific inducibility
HvPUT4	GCN4_motif	TGAGTCA	804	7	+	Oryza sativa	cis-regulatory element involved in endosperm expression
HvPUT4	LAMP-element	CTTTATCA	997	8	-	Pisum sativum	part of a light responsive element
HvPUT4	CGTCA-motif	CGTCA	1151	5	-	Hordeum vulgare	cis-acting regulatory element involved in the MeJA-responsiveness
HvPUT4	STRE	AGGGG	44	5	-	Arabidopsis thaliana
HvPUT4	STRE	AGGGG	49	5	-	Arabidopsis thaliana
HvPUT4	MYB-like sequence	TAACCA	821	6	-	Arabidopsis thaliana
HvPUT4	MYB-like sequence	TAACCA	875	6	-	Arabidopsis thaliana
HvPUT4	MYB-like sequence	TAACCA	1068	6	-	Arabidopsis thaliana
HvPUT4	ABRE	CACGTG	477	6	+	Arabidopsis thaliana	cis-acting element involved in the abscisic acid responsiveness
HvPUT4	ABRE	ACGTG	478	5	+	Arabidopsis thaliana	cis-acting element involved in the abscisic acid responsiveness
HvPUT4	ABRE	CACGTG	606	6	+	Arabidopsis thaliana	cis-acting element involved in the abscisic acid responsiveness
HvPUT4	ABRE	ACGTG	607	5	+	Arabidopsis thaliana	cis-acting element involved in the abscisic acid responsiveness
HvPUT4	ABRE	GCCGCGTGGC	611	9	+	Oryza sativa	cis-acting element involved in the abscisic acid responsiveness
HvPUT4	ABRE	CACGTG	613	6	+	Arabidopsis thaliana	cis-acting element involved in the abscisic acid responsiveness
HvPUT4	ABRE	ACGTG	614	5	+	Arabidopsis thaliana	cis-acting element involved in the abscisic acid responsiveness
HvPUT4	TCT-motif	TCTTAC	707	6	+	Arabidopsis thaliana	part of a light responsive element
HvPUT4	I-box	gGATAAGGTG	1018	9	+	Zea mays	part of a light responsive element
HvPUT4	MYB	CAACCA	599	6	+	Arabidopsis thaliana
HvPUT4	MYB	TAACCA	821	6	-	Arabidopsis thaliana
HvPUT4	MYB	TAACCA	875	6	-	Arabidopsis thaliana
HvPUT4	MYB	TAACCA	1068	6	-	Arabidopsis thaliana
HvPUT4	DRE core	GCCGAC	1243	6	-	Arabidopsis thaliana
HvPUT4	MYB recognition site	CCGTTG	331	6	+	Arabidopsis thaliana
HvPUT4	Myb	TAACTG	1125	6	-	Arabidopsis thaliana
HvPUT4	Myb	CAACTG	1328	6	+	Arabidopsis thaliana
HvPUT4	AAGAA-motif	GAAAGAA	540	7	+	Avena sativa
HvPUT4	ERE	ATTTTAAA	260	8	+	Nicotiana glutinos
HvPUT4	P-box	CCTTTTG	1185	7	-	Oryza sativa	gibberellin-responsive element
HvPUT4	ATCT-motif	AATCTAATCC	836	9	+	Pisum sativum	part of a conserved DNA module involved in light responsiveness
HvPUT4	ATCT-motif	AATCTAATCC	1039	9	+	Pisum sativum	part of a conserved DNA module involved in light responsiveness
HvPUT4	Box II	CCACGTGGC	611	9	-	Petroselinum crispum	part of a light responsive element
HvPUT4	Box II	CCACGTGGC	612	9	+	Petroselinum crispum	part of a light responsive element
HvPUT4	Unnamed__1	CGTGG	479	5	+	Zea mays
HvPUT4	Unnamed__1	CGTGG	592	5	-	Zea mays
HvPUT4	Unnamed__1	GCCACGTGGC	611	10	+	Petunia sp.
HvPUT4	Unnamed__1	CGTGG	612	5	-	Zea mays
HvPUT4	Unnamed__1	CGTGG	615	5	+	Zea mays
HvPUT4	CCAAT-box	CAACGG	331	6	-	Hordeum vulgare	MYBHv1 binding site
HvPUT4	G-Box	CACGTG	477	6	+	Pisum sativum	cis-acting regulatory element involved in light responsiveness
HvPUT4	G-Box	CACGTG	606	6	+	Pisum sativum	cis-acting regulatory element involved in light responsiveness
HvPUT4	G-Box	CACGTG	613	6	+	Pisum sativum	cis-acting regulatory element involved in light responsiveness
HvPUT4	TCA	TCATCTTCAT	439	10	+	Pisum sativum
HvPUT4	TCA	TCATCTTCAT	559	9	+	Pisum sativum
HvPUT4	AC-I	(T/C)C(T/C)(C/T)ACC(T/C)ACC	862	2023-05-08	-	Phaseolus vulgaris
HvPUT4	CAT-box	GCCACT	275	6	-	Arabidopsis thaliana	cis-acting regulatory element related to meristem expression
HvPUT4	CAT-box	GCCACT	367	6	-	Arabidopsis thaliana	cis-acting regulatory element related to meristem expression
HvPUT4	CAT-box	GCCACT	693	6	+	Arabidopsis thaliana	cis-acting regulatory element related to meristem expression
HvPUT4	Unnamed__16	GCTGCCCGTC	1417	9	+	Zea mays
HvPUT4	ABRE2	CCACGTGG	612	8	+	Zea mays
HvPUT4	G-box	CACGTG	477	6	+	Arabidopsis thaliana	cis-acting regulatory element involved in light responsiveness
HvPUT4	G-box	CACGTG	606	6	+	Arabidopsis thaliana	cis-acting regulatory element involved in light responsiveness
HvPUT4	G-box	tgACACGTGGCA	610	11	+	Lycopersicon esculentum	cis-acting regulatory element involved in light responsiveness
HvPUT4	G-box	GCCACGTGGA	611	9	+	Arabidopsis thaliana	cis-acting regulatory element involved in light responsiveness
HvPUT4	G-box	CACGTG	613	6	+	Arabidopsis thaliana	cis-acting regulatory element involved in light responsiveness
HvPUT4	Sp1	GGGCGG	3	6	-	Oryza sativa	light responsive element
HvPUT5	MYB	CAACCA	270	6	-	Arabidopsis thaliana
HvPUT5	MYB	CAACAG	1025	6	-	Arabidopsis thaliana
HvPUT5	ABRE	ACGTG	460	5	+	Arabidopsis thaliana	cis-acting element involved in the abscisic acid responsiveness
HvPUT5	STRE	AGGGG	774	5	+	Arabidopsis thaliana
HvPUT5	STRE	AGGGG	1069	5	+	Arabidopsis thaliana
HvPUT5	STRE	AGGGG	1209	5	-	Arabidopsis thaliana
HvPUT5	STRE	AGGGG	1379	5	+	Arabidopsis thaliana
HvPUT5	W box	TTGACC	543	6	-	Arabidopsis thaliana
HvPUT5	W box	TTGACC	552	6	+	Arabidopsis thaliana
HvPUT5	W box	TTGACC	681	6	-	Arabidopsis thaliana
HvPUT5	GCN4_motif	TGAGTCA	691	7	-	Oryza sativa	cis-regulatory element involved in endosperm expression
HvPUT5		motif_sequence	38	4	+	organism	short_function
HvPUT5		motif_sequence	80	4	-	organism	short_function
HvPUT5		motif_sequence	85	4	-	organism	short_function
HvPUT5		motif_sequence	361	4	+	organism	short_function
HvPUT5		motif_sequence	376	4	+	organism	short_function
HvPUT5		motif_sequence	420	4	-	organism	short_function
HvPUT5		motif_sequence	502	4	+	organism	short_function
HvPUT5		motif_sequence	504	4	-	organism	short_function
HvPUT5		motif_sequence	675	4	-	organism	short_function
HvPUT5		motif_sequence	755	4	-	organism	short_function
HvPUT5		motif_sequence	878	4	+	organism	short_function
HvPUT5		motif_sequence	1203	4	-	organism	short_function
HvPUT5		motif_sequence	1277	4	-	organism	short_function
HvPUT5		motif_sequence	1295	4	-	organism	short_function
HvPUT5		motif_sequence	1320	4	+	organism	short_function
HvPUT5		motif_sequence	1452	4	+	organism	short_function
HvPUT5	CAAT-box	CCAAT	17	5	+	Arabidopsis thaliana	common cis-acting element in promoter and enhancer regions
HvPUT5	CAAT-box	CAAT	18	4	+	Nicotiana glutinosa
HvPUT5	CAAT-box	CCAAT	20	5	-	Arabidopsis thaliana	common cis-acting element in promoter and enhancer regions
HvPUT5	CAAT-box	CAAT	130	4	+	Nicotiana glutinosa
HvPUT5	CAAT-box	CAAT	194	4	+	Nicotiana glutinosa
HvPUT5	CAAT-box	CAAAT	237	5	-	Pisum sativum	common cis-acting element in promoter and enhancer regions
HvPUT5	CAAT-box	CAAAT	315	5	-	Pisum sativum	common cis-acting element in promoter and enhancer regions
HvPUT5	CAAT-box	CAAAT	348	5	+	Pisum sativum	common cis-acting element in promoter and enhancer regions
HvPUT5	CAAT-box	CAAT	384	4	-	Nicotiana glutinosa
HvPUT5	CAAT-box	CAAT	432	4	-	Nicotiana glutinosa
HvPUT5	CAAT-box	CAAT	437	4	-	Nicotiana glutinosa
HvPUT5	CAAT-box	CAAT	546	4	+	Nicotiana glutinosa
HvPUT5	CAAT-box	CAAT	622	4	+	Nicotiana glutinosa
HvPUT5	CAAT-box	CAAT	630	4	+	Nicotiana glutinosa
HvPUT5	CAAT-box	CAAAT	662	5	-	Pisum sativum	common cis-acting element in promoter and enhancer regions
HvPUT5	CAAT-box	CCAAT	710	5	+	Arabidopsis thaliana	common cis-acting element in promoter and enhancer regions
HvPUT5	CAAT-box	CAAT	711	4	+	Nicotiana glutinosa
HvPUT5	CAAT-box	CAAT	910	4	-	Nicotiana glutinosa
HvPUT5	CAAT-box	CAAT	958	4	-	Nicotiana glutinosa
HvPUT5	CAAT-box	CAAT	1044	4	+	Nicotiana glutinosa
HvPUT5	CAAT-box	CAAAT	1127	5	+	Pisum sativum	common cis-acting element in promoter and enhancer regions
HvPUT5	CAAT-box	CAAT	1132	4	+	Nicotiana glutinosa
HvPUT5	CAAT-box	CAAAT	1140	5	+	Pisum sativum	common cis-acting element in promoter and enhancer regions
HvPUT5	CAAT-box	CAAT	1423	4	+	Nicotiana glutinosa
HvPUT5	TATA-box	ATATAT	69	6	+	Brassica napus	core promoter element around -30 of transcription start
HvPUT5	TATA-box	TATA	70	4	+	Arabidopsis thaliana	core promoter element around -30 of transcription start
HvPUT5	TATA-box	TATA	445	4	+	Arabidopsis thaliana	core promoter element around -30 of transcription start
HvPUT5	TATA-box	TATA	487	4	+	Arabidopsis thaliana	core promoter element around -30 of transcription start
HvPUT5	TATA-box	ATATAA	576	6	+	Brassica oleracea	core promoter element around -30 of transcription start
HvPUT5	TATA-box	TATA	577	4	+	Arabidopsis thaliana	core promoter element around -30 of transcription start
HvPUT5	TATA-box	ATTATA	582	6	+	Brassica napus	core promoter element around -30 of transcription start
HvPUT5	TATA-box	TATAA	583	5	-	Arabidopsis thaliana	core promoter element around -30 of transcription start
HvPUT5	TATA-box	TATA	584	4	+	Arabidopsis thaliana	core promoter element around -30 of transcription start
HvPUT5	TATA-box	ATTATA	598	6	+	Brassica napus	core promoter element around -30 of transcription start
HvPUT5	TATA-box	TATAA	599	5	-	Arabidopsis thaliana	core promoter element around -30 of transcription start
HvPUT5	TATA-box	TATA	600	4	+	Arabidopsis thaliana	core promoter element around -30 of transcription start
HvPUT5	TATA-box	taTATAAAtc	649	9	+	Arabidopsis thaliana	core promoter element around -30 of transcription start
HvPUT5	TATA-box	ATATAA	650	6	+	Brassica oleracea	core promoter element around -30 of transcription start
HvPUT5	TATA-box	TATA	651	4	+	Arabidopsis thaliana	core promoter element around -30 of transcription start
HvPUT5	TATA-box	TATA	788	4	-	Arabidopsis thaliana	core promoter element around -30 of transcription start
HvPUT5	TATA-box	TATATA	888	6	-	Arabidopsis thaliana	core promoter element around -30 of transcription start
HvPUT5	TATA-box	ATATAT	889	6	-	Brassica napus	core promoter element around -30 of transcription start
HvPUT5	TATA-box	TATA	890	4	-	Arabidopsis thaliana	core promoter element around -30 of transcription start
HvPUT5	TATA-box	TATATAA	999	7	-	Arabidopsis thaliana	core promoter element around -30 of transcription start
HvPUT5	TATA-box	TATATA	1000	6	-	Arabidopsis thaliana	core promoter element around -30 of transcription start
HvPUT5	TATA-box	ATATAT	1001	6	-	Brassica napus	core promoter element around -30 of transcription start
HvPUT5	TATA-box	TATATA	1002	6	-	Arabidopsis thaliana	core promoter element around -30 of transcription start
HvPUT5	TATA-box	TATA	1004	4	-	Arabidopsis thaliana	core promoter element around -30 of transcription start
HvPUT5	TATA-box	TATA	1153	4	-	Arabidopsis thaliana	core promoter element around -30 of transcription start
HvPUT5	TATA-box	TATA	1243	4	-	Arabidopsis thaliana	core promoter element around -30 of transcription start
HvPUT5	TATA-box	TATACA	1331	6	-	Helianthus annuus	core promoter element around -30 of transcription start
HvPUT5	TATA-box	TATA	1333	4	-	Arabidopsis thaliana	core promoter element around -30 of transcription start
HvPUT5	TATA-box	TATA	1349	4	-	Arabidopsis thaliana	core promoter element around -30 of transcription start
HvPUT5	TATA-box	TATAAAA	1413	7	-	Pisum sativum	core promoter element around -30 of transcription start
HvPUT5	TATA-box	TATAAA	1414	6	-	Helianthus annuus	core promoter element around -30 of transcription start
HvPUT5	TATA-box	TATAA	1415	5	-	Arabidopsis thaliana	core promoter element around -30 of transcription start
HvPUT5	TATA-box	TATA	1416	4	-	Arabidopsis thaliana	core promoter element around -30 of transcription start
HvPUT5	TATA-box	TACAAAA	1463	7	-	Oryza sativa	core promoter element around -30 of transcription start
HvPUT5	AT~TATA-box	TATATA	888	6	-	Arabidopsis thaliana
HvPUT5	AT~TATA-box	TATATA	1000	6	-	Arabidopsis thaliana
HvPUT5	AT~TATA-box	TATATA	1002	6	-	Arabidopsis thaliana
HvPUT5	ABRE3a	TACGTG	459	6	+	Zea mays
HvPUT5	MYC	CAATTG	18	6	+	Arabidopsis thaliana
HvPUT5	MYC	CATGTG	373	6	-	Arabidopsis thaliana
HvPUT5	MBS	CAACTG	199	6	-	Arabidopsis thaliana	MYB binding site involved in drought-inducibility
HvPUT5	WUN-motif	AAATTACTA	731	9	+	Nicotiana glutinosa
HvPUT5	TGA-element	AACGAC	1074	6	-	Brassica oleracea	auxin-responsive element
HvPUT5	ARE	AAACCA	14	6	+	Zea mays	cis-acting regulatory element essential for the anaerobic induction
HvPUT5	ARE	AAACCA	230	6	-	Zea mays	cis-acting regulatory element essential for the anaerobic induction
HvPUT5	GATA-motif	AAGGATAAGG	965	9	+	Solanum tuberosum	part of a light responsive element
HvPUT5	Unnamed__4	CTCC	80	4	-	Petroselinum hortense
HvPUT5	Unnamed__4	CTCC	288	4	-	Petroselinum hortense
HvPUT5	Unnamed__4	CTCC	853	4	+	Petroselinum hortense
HvPUT5	Unnamed__4	CTCC	880	4	+	Petroselinum hortense
HvPUT5	Unnamed__4	CTCC	1008	4	-	Petroselinum hortense
HvPUT5	Unnamed__4	CTCC	1212	4	+	Petroselinum hortense
HvPUT5	Unnamed__4	CTCC	1377	4	-	Petroselinum hortense
HvPUT5	G-box	TACGTG	459	6	+	Arabidopsis thaliana	cis-acting regulatory element involved in light responsiveness
HvPUT5	G-box	TAACACGTAG	1061	9	+	Brassica oleracea	cis-acting regulatory element involved in light responsiveness
HvPUT5	G-box	TAACACGTAG	1224	9	+	Brassica oleracea	cis-acting regulatory element involved in light responsiveness
HvPUT5	G-box	CACGAC	1263	6	+	Zea mays	cis-acting regulatory element involved in light responsiveness
HvPUT5	Box 4	ATTAAT	253	6	+	Petroselinum crispum	part of a conserved DNA module involved in light responsiveness
HvPUT5	Box 4	ATTAAT	391	6	+	Petroselinum crispum	part of a conserved DNA module involved in light responsiveness
HvPUT5	Box 4	ATTAAT	1084	6	-	Petroselinum crispum	part of a conserved DNA module involved in light responsiveness
HvPUT5	Box 4	ATTAAT	1180	6	-	Petroselinum crispum	part of a conserved DNA module involved in light responsiveness
HvPUT5	Unnamed__2	CCCCGG	718	6	-	Zea mays
HvPUT5	WRE3	CCACCT	1021	6	+	Pisum sativum
HvPUT5	WRE3	CCACCT	1342	6	-	Pisum sativum
HvPUT5	ABRE4	CACGTA	459	6	-	Zea mays
HvPUT5	AACA_motif	TAACAAACTCCA	287	11	-	Oryza sativa	involved in endosperm-specific negative expression
HvPUT5	ERE	ATTTCATA	179	8	+	Nicotiana glutinos
HvPUT5	Myb-binding site	CAACAG	1025	6	-	Nicotiana tabacum
HvPUT5	Myb	CAACTG	199	6	-	Arabidopsis thaliana
HvPUT5	Myb	TAACTG	358	6	+	Arabidopsis thaliana
HvPUT6	CCGTCC motif	CCGTCC	21	6	+	Nicotiana tabacum
HvPUT6	Unnamed__4	CTCC	16	4	-	Petroselinum hortense
HvPUT6	Unnamed__4	CTCC	164	4	-	Petroselinum hortense
HvPUT6	Unnamed__4	CTCC	252	4	-	Petroselinum hortense
HvPUT6	Unnamed__4	CTCC	326	4	+	Petroselinum hortense
HvPUT6	Unnamed__4	CTCC	359	4	+	Petroselinum hortense
HvPUT6	Unnamed__4	CTCC	462	4	-	Petroselinum hortense
HvPUT6	Unnamed__4	CTCC	682	4	+	Petroselinum hortense
HvPUT6	Unnamed__4	CTCC	799	4	+	Petroselinum hortense
HvPUT6	Unnamed__4	CTCC	1352	4	-	Petroselinum hortense
HvPUT6	Unnamed__4	CTCC	1406	4	+	Petroselinum hortense
HvPUT6	Unnamed__4	CTCC	1474	4	+	Petroselinum hortense
HvPUT6	TCCC-motif	TCTCCCT	325	7	+	Spinacia oleracea	part of a light responsive element
HvPUT6	TGACG-motif	TGACG	1328	5	-	Hordeum vulgare	cis-acting regulatory element involved in the MeJA-responsiveness
HvPUT6	as-1	TGACG	1328	5	-	Arabidopsis thaliana
HvPUT6	MYC	CATGTG	258	6	-	Arabidopsis thaliana
HvPUT6	MYC	CATTTG	829	6	+	Arabidopsis thaliana
HvPUT6	MYC	CAATTG	900	6	-	Arabidopsis thaliana
HvPUT6	MYC	CATTTG	998	6	-	Arabidopsis thaliana
HvPUT6	MYC	CATTTG	1280	6	-	Arabidopsis thaliana
HvPUT6	AT~TATA-box	TATATA	1424	6	-	Arabidopsis thaliana
HvPUT6	AT~TATA-box	TATATA	1426	6	-	Arabidopsis thaliana
HvPUT6	CAAT-box	CAAT	152	4	-	Nicotiana glutinosa
HvPUT6	CAAT-box	CCAAT	161	5	-	Arabidopsis thaliana	common cis-acting element in promoter and enhancer regions
HvPUT6	CAAT-box	CAAT	203	4	-	Nicotiana glutinosa
HvPUT6	CAAT-box	CAAT	229	4	-	Nicotiana glutinosa
HvPUT6	CAAT-box	CAAAT	265	5	-	Pisum sativum	common cis-acting element in promoter and enhancer regions
HvPUT6	CAAT-box	CAAT	300	4	+	Nicotiana glutinosa
HvPUT6	CAAT-box	CAAT	309	4	+	Nicotiana glutinosa
HvPUT6	CAAT-box	CAAT	318	4	+	Nicotiana glutinosa
HvPUT6	CAAT-box	CAAT	387	4	+	Nicotiana glutinosa
HvPUT6	CAAT-box	CAAT	398	4	+	Nicotiana glutinosa
HvPUT6	CAAT-box	CCAAT	416	5	+	Arabidopsis thaliana	common cis-acting element in promoter and enhancer regions
HvPUT6	CAAT-box	CAAT	417	4	+	Nicotiana glutinosa
HvPUT6	CAAT-box	CAAT	535	4	-	Nicotiana glutinosa
HvPUT6	CAAT-box	CAAT	699	4	+	Nicotiana glutinosa
HvPUT6	CAAT-box	CAAT	772	4	-	Nicotiana glutinosa
HvPUT6	CAAT-box	CAAAT	830	5	-	Pisum sativum	common cis-acting element in promoter and enhancer regions
HvPUT6	CAAT-box	CCAAT	847	5	-	Arabidopsis thaliana	common cis-acting element in promoter and enhancer regions
HvPUT6	CAAT-box	CAAAT	888	5	-	Pisum sativum	common cis-acting element in promoter and enhancer regions
HvPUT6	CAAT-box	CAAT	900	4	+	Nicotiana glutinosa
HvPUT6	CAAT-box	CAAT	902	4	-	Nicotiana glutinosa
HvPUT6	CAAT-box	CAAAT	911	5	-	Pisum sativum	common cis-acting element in promoter and enhancer regions
HvPUT6	CAAT-box	CAAT	923	4	-	Nicotiana glutinosa
HvPUT6	CAAT-box	CAAAT	935	5	-	Pisum sativum	common cis-acting element in promoter and enhancer regions
HvPUT6	CAAT-box	CAAT	947	4	-	Nicotiana glutinosa
HvPUT6	CAAT-box	CAAT	986	4	-	Nicotiana glutinosa
HvPUT6	CAAT-box	CAAAT	998	5	+	Pisum sativum	common cis-acting element in promoter and enhancer regions
HvPUT6	CAAT-box	CAAT	1006	4	-	Nicotiana glutinosa
HvPUT6	CAAT-box	CAAAT	1011	5	-	Pisum sativum	common cis-acting element in promoter and enhancer regions
HvPUT6	CAAT-box	CAAAT	1280	5	+	Pisum sativum	common cis-acting element in promoter and enhancer regions
HvPUT6	circadian	CAAAGATATC	300	9	+	Lycopersicon esculentum	cis-acting regulatory element involved in circadian control
HvPUT6	circadian	CAAAGATATC	528	9	+	Lycopersicon esculentum	cis-acting regulatory element involved in circadian control
HvPUT6	Gap-box	CAAATGAA(A/G)A	1280	2023-05-09	+	Arabidopsis thaliana	part of a light responsive element
HvPUT6	TATA-box	TACAAAA	373	7	+	Oryza sativa	core promoter element around -30 of transcription start
HvPUT6	TATA-box	ATATAT	1052	6	-	Brassica napus	core promoter element around -30 of transcription start
HvPUT6	TATA-box	TATA	1053	4	-	Arabidopsis thaliana	core promoter element around -30 of transcription start
HvPUT6	TATA-box	TATATAA	1423	7	-	Arabidopsis thaliana	core promoter element around -30 of transcription start
HvPUT6	TATA-box	TATATA	1424	6	-	Arabidopsis thaliana	core promoter element around -30 of transcription start
HvPUT6	TATA-box	ATATAT	1425	6	-	Brassica napus	core promoter element around -30 of transcription start
HvPUT6	TATA-box	TATATA	1426	6	-	Arabidopsis thaliana	core promoter element around -30 of transcription start
HvPUT6	TATA-box	ATATAT	1427	6	-	Brassica napus	core promoter element around -30 of transcription start
HvPUT6	TATA-box	TATA	1428	4	-	Arabidopsis thaliana	core promoter element around -30 of transcription start
HvPUT6	TATC-box	TATCCCA	401	7	-	Oryza sativa	cis-acting element involved in gibberellin-responsiveness
HvPUT6		motif_sequence	2	4	-	organism	short_function
HvPUT6		motif_sequence	69	4	+	organism	short_function
HvPUT6		motif_sequence	89	4	-	organism	short_function
HvPUT6		motif_sequence	311	4	+	organism	short_function
HvPUT6		motif_sequence	324	4	+	organism	short_function
HvPUT6		motif_sequence	618	4	-	organism	short_function
HvPUT6		motif_sequence	760	4	-	organism	short_function
HvPUT6		motif_sequence	814	4	-	organism	short_function
HvPUT6		motif_sequence	881	4	+	organism	short_function
HvPUT6		motif_sequence	1468	4	+	organism	short_function
HvPUT6	CGTCA-motif	CGTCA	1328	5	+	Hordeum vulgare	cis-acting regulatory element involved in the MeJA-responsiveness
HvPUT6	W box	TTGACC	1148	6	+	Arabidopsis thaliana
HvPUT6	W box	TTGACC	1368	6	+	Arabidopsis thaliana
HvPUT6	GT1-motif	GGTTAA	674	6	+	Arabidopsis thaliana	light responsive element
HvPUT6	STRE	AGGGG	125	5	+	Arabidopsis thaliana
HvPUT6	DRE core	GCCGAC	794	6	-	Arabidopsis thaliana
HvPUT6	MYB recognition site	CCGTTG	1437	6	-	Arabidopsis thaliana
HvPUT6	MYB	CAACCA	9	6	+	Arabidopsis thaliana
HvPUT6	AAGAA-motif	GAAAGAA	724	7	+	Avena sativa
HvPUT6	AE-box	AGAAACAA	687	8	-	Arabidopsis thaliana	part of a module for light response
HvPUT6	CCAAT-box	CAACGG	1437	6	+	Hordeum vulgare	MYBHv1 binding site
HvPUT6	Unnamed__1	CGTGG	12	5	-	Zea mays
HvPUT6	Unnamed__2	CCCCGG	134	6	-	Zea mays
HvPUT6	LTR	CCGAAA	546	6	-	Hordeum vulgare	cis-acting element involved in low-temperature responsiveness
HvPUT6	WRE3	CCACCT	166	6	-	Pisum sativum
HvPUT6	Sp1	GGGCGG	838	6	+	Oryza sativa	light responsive element
HvPUT6	NON	CAACGGCCACG	1437	10	+	Nicotiana tabacum
HvPUT6	Box 4	ATTAAT	103	6	+	Petroselinum crispum	part of a conserved DNA module involved in light responsiveness
HvPUT6	Box 4	ATTAAT	342	6	+	Petroselinum crispum	part of a conserved DNA module involved in light responsiveness
HvPUT6	Box 4	ATTAAT	1394	6	-	Petroselinum crispum	part of a conserved DNA module involved in light responsiveness
HvPUT6	CCGTCC-box	CCGTCC	21	6	+	Petroselinum hortense
HvPUT6	A-box	CCGTCC	21	6	+	Petroselinum crispum	cis-acting regulatory element
HvPUT7	ACE	GCGACGTACC	883	9	-	Petroselinum crispum	cis-acting element involved in light responsiveness
HvPUT7	P-box	CCTTTTG	479	7	-	Oryza sativa	gibberellin-responsive element
HvPUT7	AE-box	AGAAACTT	619	8	-	Arabidopsis thaliana	part of a module for light response
HvPUT7	Myb	CAACTG	216	6	-	Arabidopsis thaliana
HvPUT7	Myb	CAACTG	525	6	-	Arabidopsis thaliana
HvPUT7	Myb	CAACTG	1334	6	+	Arabidopsis thaliana
HvPUT7	CCGTCC-box	CCGTCC	1324	6	-	Petroselinum hortense
HvPUT7	A-box	CCGTCC	1324	6	-	Petroselinum crispum	cis-acting regulatory element
HvPUT7	G-box	CACGTC	574	6	+	Zea mays	cis-acting regulatory element involved in light responsiveness
HvPUT7	G-box	TACGTG	666	6	+	Arabidopsis thaliana	cis-acting regulatory element involved in light responsiveness
HvPUT7	WRE3	CCACCT	568	6	+	Pisum sativum
HvPUT7	CAT-box	GCCACT	807	6	+	Arabidopsis thaliana	cis-acting regulatory element related to meristem expression
HvPUT7	Unnamed__1	CGTGG	554	5	+	Zea mays
HvPUT7	Unnamed__1	CGTGG	1094	5	+	Zea mays
HvPUT7	Unnamed__1	CGTGG	1459	5	-	Zea mays
HvPUT7	ABRE4	CACGTA	666	6	-	Zea mays
HvPUT7	CAAT-box	CCAAT	41	5	+	Arabidopsis thaliana	common cis-acting element in promoter and enhancer regions
HvPUT7	CAAT-box	CAAT	42	4	+	Nicotiana glutinosa
HvPUT7	CAAT-box	CAAT	242	4	+	Nicotiana glutinosa
HvPUT7	CAAT-box	CAAT	277	4	+	Nicotiana glutinosa
HvPUT7	CAAT-box	CAAT	306	4	-	Nicotiana glutinosa
HvPUT7	CAAT-box	CAAT	339	4	-	Nicotiana glutinosa
HvPUT7	CAAT-box	CCAAT	365	5	-	Arabidopsis thaliana	common cis-acting element in promoter and enhancer regions
HvPUT7	CAAT-box	CAAT	392	4	+	Nicotiana glutinosa
HvPUT7	CAAT-box	CAAT	608	4	+	Nicotiana glutinosa
HvPUT7	CAAT-box	CAAAT	636	5	+	Pisum sativum	common cis-acting element in promoter and enhancer regions
HvPUT7	CAAT-box	CAAT	678	4	+	Nicotiana glutinosa
HvPUT7	CAAT-box	CCAAT	704	5	-	Arabidopsis thaliana	common cis-acting element in promoter and enhancer regions
HvPUT7	CAAT-box	CAAT	772	4	+	Nicotiana glutinosa
HvPUT7	CAAT-box	CAAT	774	4	-	Nicotiana glutinosa
HvPUT7	CAAT-box	CCAAT	793	5	+	Arabidopsis thaliana	common cis-acting element in promoter and enhancer regions
HvPUT7	CAAT-box	CAAT	794	4	+	Nicotiana glutinosa
HvPUT7	CAAT-box	CAAT	835	4	+	Nicotiana glutinosa
HvPUT7	CAAT-box	CAAT	841	4	+	Nicotiana glutinosa
HvPUT7	CAAT-box	CAAAT	872	5	-	Pisum sativum	common cis-acting element in promoter and enhancer regions
HvPUT7	CAAT-box	CAAAT	966	5	+	Pisum sativum	common cis-acting element in promoter and enhancer regions
HvPUT7	CAAT-box	CCAAT	986	5	-	Arabidopsis thaliana	common cis-acting element in promoter and enhancer regions
HvPUT7	CAAT-box	CCAAT	1064	5	-	Arabidopsis thaliana	common cis-acting element in promoter and enhancer regions
HvPUT7	CAAT-box	CAAAT	1075	5	+	Pisum sativum	common cis-acting element in promoter and enhancer regions
HvPUT7	CAAT-box	CCAAT	1124	5	+	Arabidopsis thaliana	common cis-acting element in promoter and enhancer regions
HvPUT7	CAAT-box	CAAT	1125	4	+	Nicotiana glutinosa
HvPUT7	CAAT-box	CAAAT	1165	5	-	Pisum sativum	common cis-acting element in promoter and enhancer regions
HvPUT7	CAAT-box	CAAAT	1173	5	-	Pisum sativum	common cis-acting element in promoter and enhancer regions
HvPUT7	CAAT-box	CAAT	1218	4	+	Nicotiana glutinosa
HvPUT7	CAAT-box	CAAT	1397	4	+	Nicotiana glutinosa
HvPUT7	TATA-box	TATA	136	4	+	Arabidopsis thaliana	core promoter element around -30 of transcription start
HvPUT7	TATA-box	ATATAT	290	6	+	Brassica napus	core promoter element around -30 of transcription start
HvPUT7	TATA-box	TATA	291	4	+	Arabidopsis thaliana	core promoter element around -30 of transcription start
HvPUT7	TATA-box	TATA	376	4	+	Arabidopsis thaliana	core promoter element around -30 of transcription start
HvPUT7	TATA-box	ATATAT	583	6	+	Brassica napus	core promoter element around -30 of transcription start
HvPUT7	TATA-box	TATATA	584	6	+	Arabidopsis thaliana	core promoter element around -30 of transcription start
HvPUT7	TATA-box	ATATAT	585	6	+	Brassica napus	core promoter element around -30 of transcription start
HvPUT7	TATA-box	TATATA	586	6	+	Arabidopsis thaliana	core promoter element around -30 of transcription start
HvPUT7	TATA-box	TATA	588	4	+	Arabidopsis thaliana	core promoter element around -30 of transcription start
HvPUT7	TATA-box	TATACA	630	6	-	Helianthus annuus	core promoter element around -30 of transcription start
HvPUT7	TATA-box	TATA	632	4	+	Arabidopsis thaliana	core promoter element around -30 of transcription start
HvPUT7	TATA-box	TATACA	647	6	-	Helianthus annuus	core promoter element around -30 of transcription start
HvPUT7	TATA-box	TATA	649	4	+	Arabidopsis thaliana	core promoter element around -30 of transcription start
HvPUT7	TATA-box	TATAA	999	5	-	Arabidopsis thaliana	core promoter element around -30 of transcription start
HvPUT7	TATA-box	TATA	1000	4	-	Arabidopsis thaliana	core promoter element around -30 of transcription start
HvPUT7	TATA-box	ATATAA	1057	6	+	Brassica oleracea	core promoter element around -30 of transcription start
HvPUT7	TATA-box	TATA	1058	4	-	Arabidopsis thaliana	core promoter element around -30 of transcription start
HvPUT7	TATA-box	TATA	1079	4	-	Arabidopsis thaliana	core promoter element around -30 of transcription start
HvPUT7	TATA-box	TATA	1142	4	-	Arabidopsis thaliana	core promoter element around -30 of transcription start
HvPUT7	TATA-box	taTATAAAtc	1408	9	-	Arabidopsis thaliana	core promoter element around -30 of transcription start
HvPUT7	TATA-box	TATAAAA	1409	7	-	Pisum sativum	core promoter element around -30 of transcription start
HvPUT7	TATA-box	TATAAA	1410	6	-	Helianthus annuus	core promoter element around -30 of transcription start
HvPUT7	TATA-box	TATATAA	1411	7	-	Arabidopsis thaliana	core promoter element around -30 of transcription start
HvPUT7	TATA-box	TATATA	1412	6	-	Arabidopsis thaliana	core promoter element around -30 of transcription start
HvPUT7	TATA-box	TATA	1414	4	-	Arabidopsis thaliana	core promoter element around -30 of transcription start
HvPUT7	AT~TATA-box	TATATA	584	6	+	Arabidopsis thaliana
HvPUT7	AT~TATA-box	TATATA	586	6	+	Arabidopsis thaliana
HvPUT7	AT~TATA-box	TATATAAA	1410	8	-	Arabidopsis thaliana
HvPUT7	AT~TATA-box	TATATA	1412	6	-	Arabidopsis thaliana
HvPUT7	MBS	CAACTG	216	6	-	Arabidopsis thaliana	MYB binding site involved in drought-inducibility
HvPUT7	MBS	CAACTG	525	6	-	Arabidopsis thaliana	MYB binding site involved in drought-inducibility
HvPUT7	MBS	CAACTG	1334	6	+	Arabidopsis thaliana	MYB binding site involved in drought-inducibility
HvPUT7	MYC	CAATTG	772	6	-	Arabidopsis thaliana
HvPUT7	MYC	CATTTG	966	6	-	Arabidopsis thaliana
HvPUT7	as-1	TGACG	95	5	+	Arabidopsis thaliana
HvPUT7	as-1	TGACG	878	5	-	Arabidopsis thaliana
HvPUT7	TGACG-motif	TGACG	95	5	+	Hordeum vulgare	cis-acting regulatory element involved in the MeJA-responsiveness
HvPUT7	TGACG-motif	TGACG	878	5	-	Hordeum vulgare	cis-acting regulatory element involved in the MeJA-responsiveness
HvPUT7	JERE	AGACCGCC	465	8	-	Arabidopsis thaliana
HvPUT7	ABRE3a	TACGTG	666	6	+	Zea mays
HvPUT7	WUN-motif	CAATTACAT	608	9	+	Nicotiana glutinosa
HvPUT7	Unnamed__4	CTCC	103	4	-	Petroselinum hortense
HvPUT7	Unnamed__4	CTCC	145	4	+	Petroselinum hortense
HvPUT7	Unnamed__4	CTCC	350	4	+	Petroselinum hortense
HvPUT7	Unnamed__4	CTCC	471	4	+	Petroselinum hortense
HvPUT7	Unnamed__4	CTCC	579	4	+	Petroselinum hortense
HvPUT7	Unnamed__4	CTCC	937	4	+	Petroselinum hortense
HvPUT7	Unnamed__4	CTCC	982	4	+	Petroselinum hortense
HvPUT7	Unnamed__4	CTCC	1050	4	+	Petroselinum hortense
HvPUT7	Unnamed__4	CTCC	1097	4	-	Petroselinum hortense
HvPUT7	Unnamed__4	CTCC	1150	4	+	Petroselinum hortense
HvPUT7	Unnamed__4	CTCC	1246	1900-01-04	+	Petroselinum hortense
HvPUT7	Unnamed__4	CTCC	1259	4	-	Petroselinum hortense
HvPUT7	Unnamed__4	CTCC	1316	4	-	Petroselinum hortense
HvPUT7	Unnamed__4	CTCC	1347	4	-	Petroselinum hortense
HvPUT7	Unnamed__4	CTCC	1350	4	-	Petroselinum hortense
HvPUT7	Unnamed__4	CTCC	1483	4	-	Petroselinum hortense
HvPUT7	ARE	AAACCA	1086	6	+	Zea mays	cis-acting regulatory element essential for the anaerobic induction
HvPUT7	CCGTCC motif	CCGTCC	1324	6	-	Nicotiana tabacum
HvPUT7	MYB	TAACCA	38	6	+	Arabidopsis thaliana
HvPUT7	MYB	CAACCA	182	6	-	Arabidopsis thaliana
HvPUT7	STRE	AGGGG	196	5	-	Arabidopsis thaliana
HvPUT7	STRE	AGGGG	673	5	-	Arabidopsis thaliana
HvPUT7	STRE	AGGGG	892	5	-	Arabidopsis thaliana
HvPUT7	STRE	AGGGG	1313	5	+	Arabidopsis thaliana
HvPUT7	MYB-like sequence	TAACCA	38	6	+	Arabidopsis thaliana
HvPUT7	ABRE	ACGTG	574	5	-	Arabidopsis thaliana	cis-acting element involved in the abscisic acid responsiveness
HvPUT7	ABRE	ACGTG	667	5	+	Arabidopsis thaliana	cis-acting element involved in the abscisic acid responsiveness
HvPUT7	ABRE	TACGGTC	1028	7	-	Arabidopsis thaliana	cis-acting element involved in the abscisic acid responsiveness
HvPUT7	CGTCA-motif	CGTCA	95	5	-	Hordeum vulgare	cis-acting regulatory element involved in the MeJA-responsiveness
HvPUT7	CGTCA-motif	CGTCA	878	5	+	Hordeum vulgare	cis-acting regulatory element involved in the MeJA-responsiveness
HvPUT7		motif_sequence	7	4	-	organism	short_function
HvPUT7		motif_sequence	17	4	+	organism	short_function
HvPUT7		motif_sequence	78	4	+	organism	short_function
HvPUT7		motif_sequence	171	4	-	organism	short_function
HvPUT7		motif_sequence	492	4	+	organism	short_function
HvPUT7		motif_sequence	1004	4	+	organism	short_function
HvPUT7		motif_sequence	1012	4	+	organism	short_function
HvPUT7		motif_sequence	1120	4	+	organism	short_function
HvPUT7		motif_sequence	1127	4	+	organism	short_function
HvPUT7	O2-site	GATGACATGG	359	9	+	Zea mays	cis-acting regulatory element involved in zein metabolism regulation
HvBAT1	CCGTCC motif	CCGTCC	1388	6	-	Nicotiana tabacum
HvBAT1	Unnamed__4	CTCC	100	4	-	Petroselinum hortense
HvBAT1	Unnamed__4	CTCC	242	4	-	Petroselinum hortense
HvBAT1	Unnamed__4	CTCC	316	4	-	Petroselinum hortense
HvBAT1	Unnamed__4	CTCC	535	4	+	Petroselinum hortense
HvBAT1	Unnamed__4	CTCC	734	4	+	Petroselinum hortense
HvBAT1	Unnamed__4	CTCC	822	4	-	Petroselinum hortense
HvBAT1	Unnamed__4	CTCC	875	4	-	Petroselinum hortense
HvBAT1	Unnamed__4	CTCC	1298	4	-	Petroselinum hortense
HvBAT1	Unnamed__4	CTCC	1340	4	-	Petroselinum hortense
HvBAT1	Unnamed__4	CTCC	1458	4	+	Petroselinum hortense
HvBAT1	Unnamed__4	CTCC	1461	4	+	Petroselinum hortense
HvBAT1	as-1	TGACG	548	5	+	Arabidopsis thaliana
HvBAT1	CGTCA-motif	CGTCA	548	5	-	Hordeum vulgare
HvBAT1	Box 4	ATTAAT	348	6	+	Petroselinum crispum
HvBAT1	ARE	AAACCA	898	6	+	Zea mays
HvBAT1	W box	TTGACC	362	6	-	Arabidopsis thaliana
HvBAT1	W box	TTGACC	769	6	+	Arabidopsis thaliana
HvBAT1	Myb-binding site	CAACAG	935	6	-	Nicotiana tabacum
HvBAT1	A-box	CCGTCC	1388	6	-	Petroselinum crispum
HvBAT1	STRE	AGGGG	2	5	+	Arabidopsis thaliana
HvBAT1	STRE	AGGGG	819	5	+	Arabidopsis thaliana
HvBAT1	CAAT-box	CAAT	131	4	-	Nicotiana glutinosa
HvBAT1	CAAT-box	CAAAT	185	5	-	Pisum sativum
HvBAT1	CAAT-box	CAAT	237	4	-	Nicotiana glutinosa
HvBAT1	CAAT-box	CAAT	265	4	-	Nicotiana glutinosa
HvBAT1	CAAT-box	CAAT	326	4	-	Nicotiana glutinosa
HvBAT1	CAAT-box	CAAT	365	4	+	Nicotiana glutinosa
HvBAT1	CAAT-box	CCAAT	411	5	-	Arabidopsis thaliana
HvBAT1	CAAT-box	CAAAT	522	5	+	Pisum sativum
HvBAT1	CAAT-box	CAAT	799	4	-	Nicotiana glutinosa
HvBAT1	CAAT-box	CAAAT	833	5	-	Pisum sativum
HvBAT1	CAAT-box	CAAT	864	4	-	Nicotiana glutinosa
HvBAT1	CAAT-box	CCAAT	948	5	-	Arabidopsis thaliana
HvBAT1	CAAT-box	CAAT	980	4	-	Nicotiana glutinosa
HvBAT1	CAAT-box	CCAAT	1010	5	-	Arabidopsis thaliana
HvBAT1	CAAT-box	CAAAT	1028	5	-	Pisum sativum
HvBAT1	CAAT-box	CAAAT	1172	5	+	Pisum sativum
HvBAT1	CAAT-box	CAAAT	1326	5	+	Pisum sativum
HvBAT1	CAAT-box	CAAT	1411	4	+	Nicotiana glutinosa
HvBAT1	G-box	GCCACGTGGA	1291	9	+	Arabidopsis thaliana
HvBAT1	G-box	GCCACGTGGA	1377	9	-	Arabidopsis thaliana
HvBAT1	G-box	CACGTG	1379	6	-	Arabidopsis thaliana
HvBAT1	MBS	CAACTG	594	6	-	Arabidopsis thaliana
HvBAT1	AT~TATA-box	TATATA	1213	6	-	Arabidopsis thaliana
HvBAT1	MYC	CATGTG	902	6	+	Arabidopsis thaliana
HvBAT1	MYC	CATGTG	1185	6	+	Arabidopsis thaliana
HvBAT1	CAT-box	GCCACT	531	6	+	Arabidopsis thaliana
HvBAT1	CAT-box	GCCACT	1159	6	+	Arabidopsis thaliana
HvBAT1	CAT-box	GCCACT	1250	6	+	Arabidopsis thaliana
HvBAT1	CAT-box	GCCACT	1291	6	+	Arabidopsis thaliana
HvBAT1	Unnamed__1	CGTGG	403	5	+	Zea mays
HvBAT1	Unnamed__1	CGTGG	1315	5	+	Zea mays
HvBAT1	Unnamed__1	CGTGG	1362	5	-	Zea mays
HvBAT1	Unnamed__1	CGTGG	1381	5	+	Zea mays
HvBAT1	ABRE	ACGTG	510	5	+	Arabidopsis thaliana
HvBAT1	ABRE	CACGTG	1379	6	-	Arabidopsis thaliana
HvBAT1	ABRE	ACGTG	1380	5	+	Arabidopsis thaliana
HvBAT1	G-Box	CACGTT	509	6	-	Pisum sativum
HvBAT1	G-Box	CACGTGAAA	1376	9	-	Pisum sativum
HvBAT1	G-Box	CACGTG	1379	6	-	Pisum sativum
HvBAT1	TCA	TCATCTTCAT	302	9	+	Pisum sativum
HvBAT1	circadian	CAAAGATATC	41	9	-	Lycopersicon esculentum
HvBAT1	GCN4_motif	TGAGTCA	1484	7	+	Oryza sativa
HvBAT1	GARE-motif	TCTGTTG	934	7	+	Brassica oleracea
HvBAT1	MYB	CAACAG	935	6	-	Arabidopsis thaliana
HvBAT1	AT-rich sequence	TAAAATACT	1140	9	-	Pisum sativum
HvBAT1	TGACG-motif	TGACG	548	5	+	Hordeum vulgare
HvBAT1	CCGTCC-box	CCGTCC	1388	6	-	Petroselinum hortense
HvBAT1	TATA-box	taTATAAAtc	149	9	-	Arabidopsis thaliana
HvBAT1	TATA-box	TATAAAT	150	7	-	Brassica juncea
HvBAT1	TATA-box	TATAAA	151	6	-	Helianthus annuus
HvBAT1	TATA-box	TATAA	152	5	-	Arabidopsis thaliana
HvBAT1	TATA-box	TATA	153	4	+	Arabidopsis thaliana
HvBAT1	TATA-box	TACATAAA	341	8	-	Oryza sativa
HvBAT1	TATA-box	ATATAT	430	6	+	Brassica napus
HvBAT1	TATA-box	TATA	431	4	+	Arabidopsis thaliana
HvBAT1	TATA-box	TATAAA	625	6	-	Helianthus annuus
HvBAT1	TATA-box	TATAA	626	5	-	Arabidopsis thaliana
HvBAT1	TATA-box	TATA	627	4	+	Arabidopsis thaliana
HvBAT1	TATA-box	TATA	783	4	-	Arabidopsis thaliana
HvBAT1	TATA-box	ATTATA	845	6	+	Brassica napus
HvBAT1	TATA-box	TATAA	846	5	-	Arabidopsis thaliana
HvBAT1	TATA-box	TATA	847	4	-	Arabidopsis thaliana
HvBAT1	TATA-box	ATATAT	888	6	-	Brassica napus
HvBAT1	TATA-box	TATA	889	4	-	Arabidopsis thaliana
HvBAT1	TATA-box	TATACA	1211	6	-	Helianthus annuus
HvBAT1	TATA-box	TATATA	1213	6	-	Arabidopsis thaliana
HvBAT1	TATA-box	ATATAA	1214	6	+	Brassica oleracea
HvBAT1	TATA-box	TATA	1215	4	-	Arabidopsis thaliana
HvBAT1	TATA-box	TATAA	1468	5	-	Arabidopsis thaliana
HvBAT1	TATA-box	TATA	1469	4	-	Arabidopsis thaliana
HvBAT1	Myb	CAACTG	594	6	-	Arabidopsis thaliana
HvBAT1	TGA-element	AACGAC	1043	6	+	Brassica oleracea
HvBAT1	WRE3	CCACCT	1425	6	+	Pisum sativum
HvBAT1	TCCC-motif	TCTCCCT	1338	7	-	Spinacia oleracea
HvBAT1	AuxRR-core	GGTCCAT	675	7	-	Nicotiana tabacum
HvBAT1		motif_sequence	268	4	-	organism
HvBAT1		motif_sequence	304	4	+	organism
HvBAT1		motif_sequence	474	4	+	organism
HvBAT1		motif_sequence	553	4	+	organism
HvBAT1		motif_sequence	642	4	+	organism
HvBAT1		motif_sequence	692	4	+	organism
HvBAT1		motif_sequence	732	4	+	organism
HvBAT1		motif_sequence	822	4	-	organism
HvBAT1		motif_sequence	912	4	-	organism
HvBAT1		motif_sequence	1067	4	-	organism
HvBAT1		motif_sequence	1180	4	+	organism
HvBAT1		motif_sequence	1182	4	-	organism
HvBAT1		motif_sequence	1204	4	+	organism
HvBAT2	STRE	AGGGG	169	5	-	Arabidopsis thaliana
HvBAT2	STRE	AGGGG	853	5	+	Arabidopsis thaliana
HvBAT2	STRE	AGGGG	861	5	+	Arabidopsis thaliana
HvBAT2	STRE	AGGGG	908	5	+	Arabidopsis thaliana
HvBAT2	STRE	AGGGG	1419	5	+	Arabidopsis thaliana
HvBAT2	G-box	CACGTG	1309	6	-	Arabidopsis thaliana
HvBAT2	G-box	TACGTG	1354	6	-	Arabidopsis thaliana
HvBAT2	CAAT-box	CAAT	38	4	+	Nicotiana glutinosa
HvBAT2	CAAT-box	CAAT	131	4	+	Nicotiana glutinosa
HvBAT2	CAAT-box	CAAAT	137	5	-	Pisum sativum
HvBAT2	CAAT-box	CAAT	265	4	+	Nicotiana glutinosa
HvBAT2	CAAT-box	CAAT	338	4	+	Nicotiana glutinosa
HvBAT2	CAAT-box	CAAAT	465	5	-	Pisum sativum
HvBAT2	CAAT-box	CAAT	497	4	+	Nicotiana glutinosa
HvBAT2	CAAT-box	CAAT	579	4	+	Nicotiana glutinosa
HvBAT2	CAAT-box	CAAAT	599	5	+	Pisum sativum
HvBAT2	CAAT-box	CAAAT	614	5	+	Pisum sativum
HvBAT2	CAAT-box	CAAT	666	4	+	Nicotiana glutinosa
HvBAT2	CAAT-box	CAAT	790	4	-	Nicotiana glutinosa
HvBAT2	CAAT-box	CAAAT	832	5	-	Pisum sativum
HvBAT2	CAAT-box	CAAAT	844	5	-	Pisum sativum
HvBAT2	CAAT-box	CAAAT	1125	5	+	Pisum sativum
HvBAT2	CAAT-box	CCAAT	1145	5	+	Arabidopsis thaliana
HvBAT2	CAAT-box	CAAT	1146	4	+	Nicotiana glutinosa
HvBAT2	CAAT-box	CAAAT	1175	5	+	Pisum sativum
HvBAT2	CAAT-box	CAAAT	1196	5	+	Pisum sativum
HvBAT2	CAAT-box	CAAAT	1217	5	+	Pisum sativum
HvBAT2	CAAT-box	CAAAT	1282	5	+	Pisum sativum
HvBAT2	CAAT-box	CAAAT	1285	5	-	Pisum sativum
HvBAT2	CAAT-box	CAAT	1343	4	-	Nicotiana glutinosa
HvBAT2	CAAT-box	CAAAT	1398	5	-	Pisum sativum
HvBAT2	CAAT-box	CAAAT	1427	5	+	Pisum sativum
HvBAT2	RY-element	CATGCATG	415	8	+	Helianthus annuus
HvBAT2	Unnamed__14	TCCACGTAGA	1352	9	+	Zea mays
HvBAT2	TATA	TATAAAAT	603	8	+	Arabidopsis thaliana
HvBAT2	AAGAA-motif	GAAAGAA	1455	7	+	Avena sativa
HvBAT2	W box	TTGACC	1113	6	-	Arabidopsis thaliana
HvBAT2	ATC-motif	AGTAATCT	1245	8	+	Spinacia oleracea
HvBAT2	CGTCA-motif	CGTCA	204	5	+	Hordeum vulgare
HvBAT2	CGTCA-motif	CGTCA	565	5	+	Hordeum vulgare
HvBAT2	CGTCA-motif	CGTCA	996	5	+	Hordeum vulgare
HvBAT2	CGTCA-motif	CGTCA	1047	5	-	Hordeum vulgare
HvBAT2	CGTCA-motif	CGTCA	1065	5	+	Hordeum vulgare
HvBAT2	CGTCA-motif	CGTCA	1082	5	-	Hordeum vulgare
HvBAT2	ABRE3a	TACGTG	1354	6	-	Zea mays
HvBAT2	CARE	CAACTCAC	306	8	+	Oryza sativa
HvBAT2	Box 4	ATTAAT	385	6	+	Petroselinum crispum
HvBAT2	TCT-motif	TCTTAC	51	6	-	Arabidopsis thaliana
HvBAT2	Unnamed__12	TCCACGTAGA	1352	9	+	Zea mays
HvBAT2	as-1	TGACG	204	5	-	Arabidopsis thaliana
HvBAT2	as-1	TGACG	565	5	-	Arabidopsis thaliana
HvBAT2	as-1	TGACG	996	5	-	Arabidopsis thaliana
HvBAT2	as-1	TGACG	1047	5	+	Arabidopsis thaliana
HvBAT2	as-1	TGACG	1065	5	-	Arabidopsis thaliana
HvBAT2	as-1	TGACG	1082	5	+	Arabidopsis thaliana
HvBAT2	Unnamed__4	CTCC	175	4	+	Petroselinum hortense
HvBAT2	Unnamed__4	CTCC	328	4	+	Petroselinum hortense
HvBAT2	Unnamed__4	CTCC	364	4	-	Petroselinum hortense
HvBAT2	Unnamed__4	CTCC	636	4	+	Petroselinum hortense
HvBAT2	Unnamed__4	CTCC	857	4	-	Petroselinum hortense
HvBAT2	Unnamed__4	CTCC	893	4	-	Petroselinum hortense
HvBAT2	Unnamed__4	CTCC	1040	4	-	Petroselinum hortense
HvBAT2	Unnamed__4	CTCC	1263	4	-	Petroselinum hortense
HvBAT2	Unnamed__8	TCCACGTAGA	1352	9	+	Zea mays
HvBAT2	MYB recognition site	CCGTTG	1116	6	-	Arabidopsis thaliana
HvBAT2	WRE3	CCACCT	409	6	+	Pisum sativum
HvBAT2	CCAAT-box	CAACGG	1116	6	+	Hordeum vulgare
HvBAT2	WUN-motif	AAATTACT	372	8	+	Nicotiana glutinosa
HvBAT2		motif_sequence	4	4	+	organism
HvBAT2		motif_sequence	6	4	-	organism
HvBAT2		motif_sequence	61	4	+	organism
HvBAT2		motif_sequence	141	4	-	organism
HvBAT2		motif_sequence	326	4	+	organism
HvBAT2		motif_sequence	353	4	+	organism
HvBAT2		motif_sequence	404	4	+	organism
HvBAT2		motif_sequence	539	4	-	organism
HvBAT2		motif_sequence	769	4	-	organism
HvBAT2		motif_sequence	823	4	+	organism
HvBAT2		motif_sequence	836	4	-	organism
HvBAT2		motif_sequence	857	4	-	organism
HvBAT2		motif_sequence	1040	4	-	organism
HvBAT2		motif_sequence	1276	4	-	organism
HvBAT2		motif_sequence	1357	4	-	organism
HvBAT2		motif_sequence	1380	4	-	organism
HvBAT2		motif_sequence	1415	4	-	organism
HvBAT2		motif_sequence	1478	4	-	organism
HvBAT2		motif_sequence	1483	4	-	organism
HvBAT2	O2-site	GATGATGTGG	226	9	-	Zea mays
HvBAT2	O2-site	GATGATGTGG	343	9	-	Zea mays
HvBAT2	TGACG-motif	TGACG	204	5	-	Hordeum vulgare
HvBAT2	TGACG-motif	TGACG	565	5	-	Hordeum vulgare
HvBAT2	TGACG-motif	TGACG	996	5	-	Hordeum vulgare
HvBAT2	TGACG-motif	TGACG	1047	5	+	Hordeum vulgare
HvBAT2	TGACG-motif	TGACG	1065	5	-	Hordeum vulgare
HvBAT2	TGACG-motif	TGACG	1082	5	+	Hordeum vulgare
HvBAT2	TCA-element	CCATCTTTTT	504	9	+	Nicotiana tabacum
HvBAT2	TATA-box	TATTTAAA	119	8	-	Arabidopsis thaliana
HvBAT2	TATA-box	ATATAT	133	6	+	Brassica napus
HvBAT2	TATA-box	TATA	134	4	+	Arabidopsis thaliana
HvBAT2	TATA-box	TACAAAA	244	7	+	Oryza sativa
HvBAT2	TATA-box	TATATAA	459	7	-	Arabidopsis thaliana
HvBAT2	TATA-box	TATATA	460	6	+	Arabidopsis thaliana
HvBAT2	TATA-box	ATATAT	461	6	+	Brassica napus
HvBAT2	TATA-box	TATA	462	4	+	Arabidopsis thaliana
HvBAT2	TATA-box	TATTTAAA	582	8	-	Arabidopsis thaliana
HvBAT2	TATA-box	ATATAA	602	6	+	Brassica oleracea
HvBAT2	TATA-box	TATA	603	4	+	Arabidopsis thaliana
HvBAT2	TATA-box	TACAAAA	716	7	+	Oryza sativa
HvBAT2	TATA-box	ATATAA	975	6	+	Brassica oleracea
HvBAT2	TATA-box	TATA	976	4	-	Arabidopsis thaliana
HvBAT2	TATA-box	ATTATA	1268	6	+	Brassica napus
HvBAT2	TATA-box	TATAA	1269	5	-	Arabidopsis thaliana
HvBAT2	TATA-box	TATA	1270	4	-	Arabidopsis thaliana
HvBAT2	TATA-box	TATA	1431	4	-	Arabidopsis thaliana
HvBAT2	Unnamed__10	TCCACGTAGA	1352	9	+	Zea mays
HvBAT2	CTAG-motif	ACTAGCAGAA	1411	9	+	Avena sativa
HvBAT2	ABRE4	CACGTA	1354	6	+	Zea mays
HvBAT2	G-Box	CACGTT	534	6	-	Pisum sativum
HvBAT2	G-Box	CACGTG	1309	6	-	Pisum sativum
HvBAT2	ABRE	ACGTG	535	5	+	Arabidopsis thaliana
HvBAT2	ABRE	CGTACGTGCA	1307	9	-	Hordeum vulgare
HvBAT2	ABRE	CACGTG	1309	6	-	Arabidopsis thaliana
HvBAT2	ABRE	ACGTG	1310	5	+	Arabidopsis thaliana
HvBAT2	ABRE	ACGTG	1354	5	-	Arabidopsis thaliana
HvBAT2	AT~TATA-box	TATATA	460	6	+	Arabidopsis thaliana
HvBAT2	LAMP-element	CTTTATCA	378	8	+	Pisum sativum
HvBAT2	MYC	CATGTG	1207	6	-	Arabidopsis thaliana
HvBAT2	MYC	CATGTG	1322	6	-	Arabidopsis thaliana
HvBAT2	I-box	gGATAAGGTG	636	9	-	Zea mays
HvBAT2	I-box	ccttatcct	638	9	+	Arabidopsis thaliana
HvBAT2	GATA-motif	AAGGATAAGG	638	9	-	Solanum tuberosum
HvBAT3	G-Box	CACGTT	875	6	-	Pisum sativum
HvBAT3	G-Box	CACGTT	956	6	-	Pisum sativum
HvBAT3	G-Box	CACGTT	1010	6	+	Pisum sativum
HvBAT3	NON	CAACGGCCACG	396	10	+	Nicotiana tabacum
HvBAT3	circadian	CAAAGATATC	1121	9	-	Lycopersicon esculentum
HvBAT3	GATA-motif	GATAGGA	1431	7	+	Arabidopsis thaliana
HvBAT3	CAT-box	GCCACT	486	6	-	Arabidopsis thaliana
HvBAT3	CAT-box	GCCACT	1356	6	+	Arabidopsis thaliana
HvBAT3	MYC	CATTTG	669	6	+	Arabidopsis thaliana
HvBAT3	MYC	CATGTG	978	6	-	Arabidopsis thaliana
HvBAT3	ABRE	ACGTG	876	5	+	Arabidopsis thaliana
HvBAT3	ABRE	ACGTG	957	5	+	Arabidopsis thaliana
HvBAT3	ABRE	ACGTG	1010	5	-	Arabidopsis thaliana
HvBAT3	Unnamed__1	CGTGG	1338	5	+	Zea mays
HvBAT3	MSA-like	(T/C)C(T/C)AACGG(T/C)(T/C)A	241	2023-05-08	+	Catharanthus roseus
HvBAT3	AE-box	AGAAACTT	368	8	+	Arabidopsis thaliana
HvBAT3	AuxRR-core	GGTCCAT	258	7	-	Nicotiana tabacum
HvBAT3		motif_sequence	64	4	-	organism
HvBAT3		motif_sequence	130	4	+	organism
HvBAT3		motif_sequence	149	4	-	organism
HvBAT3		motif_sequence	196	4	-	organism
HvBAT3		motif_sequence	449	4	-	organism
HvBAT3		motif_sequence	496	4	-	organism
HvBAT3		motif_sequence	723	4	+	organism
HvBAT3		motif_sequence	793	4	-	organism
HvBAT3		motif_sequence	937	4	+	organism
HvBAT3		motif_sequence	939	4	-	organism
HvBAT3		motif_sequence	1171	4	-	organism
HvBAT3		motif_sequence	1191	4	+	organism
HvBAT3		motif_sequence	1221	4	+	organism
HvBAT3		motif_sequence	1277	4	+	organism
HvBAT3		motif_sequence	1341	4	-	organism
HvBAT3		motif_sequence	1428	4	-	organism
HvBAT3	Unnamed__2	CCCCGG	298	6	-	Zea mays
HvBAT3	Unnamed__2	AACCTAACCT	760	9	+	Petroselinum hortense
HvBAT3	Unnamed__2	CCCCGG	1156	6	-	Zea mays
HvBAT3	CCAAT-box	CAACGG	314	6	-	Hordeum vulgare
HvBAT3	CCAAT-box	CAACGG	396	6	+	Hordeum vulgare
HvBAT3	CCAAT-box	CAACGG	728	6	+	Hordeum vulgare
HvBAT3	TCCC-motif	TCTCCCT	211	7	+	Spinacia oleracea
HvBAT3	WRE3	CCACCT	440	6	+	Pisum sativum
HvBAT3	TATA-box	TATAAAA	1022	7	-	Pisum sativum
HvBAT3	TATA-box	TATAAA	1023	6	-	Helianthus annuus
HvBAT3	TATA-box	TATAA	1024	5	-	Arabidopsis thaliana
HvBAT3	TATA-box	TATA	1025	4	-	Arabidopsis thaliana
HvBAT3	CCGTCC-box	CCGTCC	819	6	+	Petroselinum hortense
HvBAT3	CCGTCC-box	CCGTCC	1435	6	-	Petroselinum hortense
HvBAT3	TCA-element	CCATCTTTTT	194	9	-	Nicotiana tabacum
HvBAT3	TGACG-motif	TGACG	18	5	-	Hordeum vulgare
HvBAT3	TGACG-motif	TGACG	492	5	+	Hordeum vulgare
HvBAT3	TGACG-motif	TGACG	517	5	-	Hordeum vulgare
HvBAT3	TGACG-motif	TGACG	1287	5	-	Hordeum vulgare
HvBAT3	MYB	CAACAG	8	6	+	Arabidopsis thaliana
HvBAT3	MYB	CAACAG	167	6	+	Arabidopsis thaliana
HvBAT3	MYB	CAACCA	1265	6	+	Arabidopsis thaliana
HvBAT3	Unnamed__4	CTCC	54	4	+	Petroselinum hortense
HvBAT3	Unnamed__4	CTCC	132	4	+	Petroselinum hortense
HvBAT3	Unnamed__4	CTCC	212	4	+	Petroselinum hortense
HvBAT3	Unnamed__4	CTCC	264	4	+	Petroselinum hortense
HvBAT3	Unnamed__4	CTCC	321	4	+	Petroselinum hortense
HvBAT3	Unnamed__4	CTCC	407	4	-	Petroselinum hortense
HvBAT3	Unnamed__4	CTCC	414	4	+	Petroselinum hortense
HvBAT3	Unnamed__4	CTCC	469	4	+	Petroselinum hortense
HvBAT3	Unnamed__4	CTCC	473	4	+	Petroselinum hortense
HvBAT3	Unnamed__4	CTCC	484	4	-	Petroselinum hortense
HvBAT3	Unnamed__4	CTCC	496	4	-	Petroselinum hortense
HvBAT3	Unnamed__4	CTCC	585	4	-	Petroselinum hortense
HvBAT3	Unnamed__4	CTCC	652	4	-	Petroselinum hortense
HvBAT3	Unnamed__4	CTCC	748	4	+	Petroselinum hortense
HvBAT3	Unnamed__4	CTCC	788	4	+	Petroselinum hortense
HvBAT3	Unnamed__4	CTCC	817	4	+	Petroselinum hortense
HvBAT3	Unnamed__4	CTCC	932	4	-	Petroselinum hortense
HvBAT3	Unnamed__4	CTCC	1153	4	+	Petroselinum hortense
HvBAT3	Unnamed__4	CTCC	1171	4	-	Petroselinum hortense
HvBAT3	Unnamed__4	CTCC	1279	4	+	Petroselinum hortense
HvBAT3	Unnamed__4	CTCC	1360	4	+	Petroselinum hortense
HvBAT3	Unnamed__4	CTCC	1380	4	+	Petroselinum hortense
HvBAT3	Unnamed__4	CTCC	1393	4	-	Petroselinum hortense
HvBAT3	Unnamed__4	CTCC	1473	4	-	Petroselinum hortense
HvBAT3	Unnamed__4	CTCC	1478	4	-	Petroselinum hortense
HvBAT3	LTR	CCGAAA	57	6	+	Hordeum vulgare
HvBAT3	LTR	CCGAAA	1307	6	+	Hordeum vulgare
HvBAT3	as-1	TGACG	18	5	-	Arabidopsis thaliana
HvBAT3	as-1	TGACG	492	5	+	Arabidopsis thaliana
HvBAT3	as-1	TGACG	517	5	-	Arabidopsis thaliana
HvBAT3	as-1	TGACG	1287	5	-	Arabidopsis thaliana
HvBAT3	DRE core	GCCGAC	1302	6	-	Arabidopsis thaliana
HvBAT3	MYB recognition site	CCGTTG	314	6	+	Arabidopsis thaliana
HvBAT3	MYB recognition site	CCGTTG	396	6	-	Arabidopsis thaliana
HvBAT3	MYB recognition site	CCGTTG	728	6	-	Arabidopsis thaliana
HvBAT3	CCGTCC motif	CCGTCC	819	6	+	Nicotiana tabacum
HvBAT3	CCGTCC motif	CCGTCC	1435	6	-	Nicotiana tabacum
HvBAT3	TATA	TATAAAAT	1021	8	-	Arabidopsis thaliana
HvBAT3	A-box	CCGTCC	819	6	+	Petroselinum crispum
HvBAT3	A-box	CCGTCC	1435	6	-	Petroselinum crispum
HvBAT3	STRE	AGGGG	466	5	-	Arabidopsis thaliana
HvBAT3	STRE	AGGGG	1458	5	+	Arabidopsis thaliana
HvBAT3	STRE	AGGGG	1475	5	+	Arabidopsis thaliana
HvBAT3	CAAT-box	CAAAT	176	5	+	Pisum sativum
HvBAT3	CAAT-box	CCAAT	255	5	+	Arabidopsis thaliana
HvBAT3	CAAT-box	CAAT	256	4	+	Nicotiana glutinosa
HvBAT3	CAAT-box	CCAAT	628	5	+	Arabidopsis thaliana
HvBAT3	CAAT-box	CAAT	629	4	+	Nicotiana glutinosa
HvBAT3	CAAT-box	CCAAT	663	5	+	Arabidopsis thaliana
HvBAT3	CAAT-box	CAAT	664	4	+	Nicotiana glutinosa
HvBAT3	CAAT-box	CAAAT	670	5	-	Pisum sativum
HvBAT3	CAAT-box	CAAT	708	4	+	Nicotiana glutinosa
HvBAT3	CAAT-box	CAAAT	903	5	+	Pisum sativum
HvBAT3	CAAT-box	CAAAT	914	5	+	Pisum sativum
HvBAT3	CAAT-box	CAAAT	990	5	-	Pisum sativum
HvBAT3	CAAT-box	CAAT	1029	4	+	Nicotiana glutinosa
HvBAT3	CAAT-box	CAAT	1214	4	+	Nicotiana glutinosa
HvBAT3	CAAT-box	CAAT	1293	4	+	Nicotiana glutinosa
HvBAT3	Sp1	GGGCGG	1460	6	+	Oryza sativa
HvBAT3	Box 4	ATTAAT	1066	6	-	Petroselinum crispum
HvBAT3	TCT-motif	TCTTAC	1134	6	+	Arabidopsis thaliana
HvBAT3	CGTCA-motif	CGTCA	18	5	+	Hordeum vulgare
HvBAT3	CGTCA-motif	CGTCA	492	5	-	Hordeum vulgare
HvBAT3	CGTCA-motif	CGTCA	517	5	+	Hordeum vulgare
HvBAT3	CGTCA-motif	CGTCA	1287	5	+	Hordeum vulgare
HvBAT3	Myb-binding site	CAACAG	8	6	+	Nicotiana tabacum
HvBAT3	Myb-binding site	CAACAG	167	6	+	Nicotiana tabacum
HvBAT3	AAGAA-motif	GAAAGAA	1198	7	-	Avena sativa
HvBAT4	TCA	TCATCTTCAT	806	9	+	Pisum sativum
HvBAT4	LAMP-element	CTTTATCA	1075	8	-	Pisum sativum
HvBAT4	Unnamed__16	GCTGCCCGTC	436	9	+	Zea mays
HvBAT4	MYC	CATGTG	50	6	-	Arabidopsis thaliana
HvBAT4	MYC	CATGTG	783	6	+	Arabidopsis thaliana
HvBAT4	MYC	CATGTG	798	6	+	Arabidopsis thaliana
HvBAT4	MYC	CATTTG	1087	6	-	Arabidopsis thaliana
HvBAT4	ABRE	ACGTG	764	5	+	Arabidopsis thaliana
HvBAT4	ABRE	ACGTG	1246	5	-	Arabidopsis thaliana
HvBAT4	Unnamed__1	CGTGG	249	5	+	Zea mays
HvBAT4	Unnamed__1	GCCACGTGGC	375	9	+	Petunia sp.
HvBAT4	Unnamed__1	CGTGG	1345	5	+	Zea mays
HvBAT4	WRE3	CCACCT	378	6	-	Pisum sativum
HvBAT4		motif_sequence	49	4	-	organism
HvBAT4		motif_sequence	110	4	+	organism
HvBAT4		motif_sequence	238	4	+	organism
HvBAT4		motif_sequence	421	4	-	organism
HvBAT4		motif_sequence	425	4	+	organism
HvBAT4		motif_sequence	443	4	+	organism
HvBAT4		motif_sequence	808	4	+	organism
HvBAT4		motif_sequence	1050	4	+	organism
HvBAT4		motif_sequence	1101	4	+	organism
HvBAT4		motif_sequence	1275	4	-	organism
HvBAT4		motif_sequence	1377	4	+	organism
HvBAT4	CCAAT-box	CAACGG	1269	6	+	Hordeum vulgare
HvBAT4	ABRE4	CACGTA	763	6	-	Zea mays
HvBAT4	ABRE4	CACGTA	1246	6	+	Zea mays
HvBAT4	TGACG-motif	TGACG	456	5	+	Hordeum vulgare
HvBAT4	MYB	CAACAG	90	6	-	Arabidopsis thaliana
HvBAT4	MYB	CAACAG	635	6	-	Arabidopsis thaliana
HvBAT4	MYB	TAACCA	899	6	-	Arabidopsis thaliana
HvBAT4	MYB	TAACCA	953	6	-	Arabidopsis thaliana
HvBAT4	MYB	TAACCA	1137	6	-	Arabidopsis thaliana
HvBAT4	MYB	CAACCA	1425	6	+	Arabidopsis thaliana
HvBAT4	TATA-box	TACAAAA	25	7	-	Oryza sativa
HvBAT4	TATA-box	TATA	1288	4	-	Arabidopsis thaliana
HvBAT4	TCA-element	CCATCTTTTT	441	9	+	Nicotiana tabacum
HvBAT4	TC-rich repeats	ATTCTCTAAC	1196	9	-	Nicotiana tabacum
HvBAT4	Unnamed__4	CTCC	159	4	+	Petroselinum hortense
HvBAT4	Unnamed__4	CTCC	169	4	-	Petroselinum hortense
HvBAT4	Unnamed__4	CTCC	240	4	+	Petroselinum hortense
HvBAT4	Unnamed__4	CTCC	372	4	-	Petroselinum hortense
HvBAT4	Unnamed__4	CTCC	427	4	+	Petroselinum hortense
HvBAT4	Unnamed__4	CTCC	652	4	+	Petroselinum hortense
HvBAT4	Unnamed__4	CTCC	1082	4	-	Petroselinum hortense
HvBAT4	Unnamed__4	CTCC	1126	4	+	Petroselinum hortense
HvBAT4	Unnamed__4	CTCC	1307	4	+	Petroselinum hortense
HvBAT4	Unnamed__4	CTCC	1321	4	+	Petroselinum hortense
HvBAT4	Unnamed__4	CTCC	1365	4	+	Petroselinum hortense
HvBAT4	Unnamed__4	CTCC	1370	4	+	Petroselinum hortense
HvBAT4	Unnamed__4	CTCC	1374	4	+	Petroselinum hortense
HvBAT4	as-1	TGACG	456	5	+	Arabidopsis thaliana
HvBAT4	LTR	CCGAAA	466	6	+	Hordeum vulgare
HvBAT4	DRE core	GCCGAC	623	6	-	Arabidopsis thaliana
HvBAT4	DRE core	GCCGAC	1494	6	+	Arabidopsis thaliana
HvBAT4	MYB recognition site	CCGTTG	1269	6	-	Arabidopsis thaliana
HvBAT4	AP-1	TGAGTTAG	882	8	+	Arabidopsis thaliana
HvBAT4	MYB-like sequence	TAACCA	899	6	-	Arabidopsis thaliana
HvBAT4	MYB-like sequence	TAACCA	953	6	-	Arabidopsis thaliana
HvBAT4	MYB-like sequence	TAACCA	1137	6	-	Arabidopsis thaliana
HvBAT4	4cl-CMA2b	TCTCACCAACCACA	1419	13	+	Solanum tuberosum
HvBAT4	AC-I	(T/C)C(T/C)(C/T)ACC(T/C)ACC	1419	2023-05-08	+	Phaseolus vulgaris
HvBAT4	ATCT-motif	AATCTAATCC	914	9	+	Pisum sativum
HvBAT4	ATCT-motif	AATCTAATCC	1117	9	+	Pisum sativum
HvBAT4	CAAT-box	CAAT	5	4	+	Nicotiana glutinosa
HvBAT4	CAAT-box	CAAAT	7	5	-	Pisum sativum
HvBAT4	CAAT-box	CAAT	74	4	+	Nicotiana glutinosa
HvBAT4	CAAT-box	CAAT	101	4	+	Nicotiana glutinosa
HvBAT4	CAAT-box	CCAAT	116	5	-	Arabidopsis thaliana
HvBAT4	CAAT-box	CAAAT	350	5	-	Pisum sativum
HvBAT4	CAAT-box	CAAT	404	4	-	Nicotiana glutinosa
HvBAT4	CAAT-box	CAAT	862	4	-	Nicotiana glutinosa
HvBAT4	CAAT-box	CCAAT	906	5	-	Arabidopsis thaliana
HvBAT4	CAAT-box	CCAAT	912	5	+	Arabidopsis thaliana
HvBAT4	CAAT-box	CAAT	913	4	+	Nicotiana glutinosa
HvBAT4	CAAT-box	CAAAT	1006	5	-	Pisum sativum
HvBAT4	CAAT-box	CAAAT	1067	5	+	Pisum sativum
HvBAT4	CAAT-box	CAAT	1073	4	-	Nicotiana glutinosa
HvBAT4	CAAT-box	CAAAT	1087	5	+	Pisum sativum
HvBAT4	CAAT-box	CCAAT	1093	5	-	Arabidopsis thaliana
HvBAT4	CAAT-box	CAAT	1111	4	-	Nicotiana glutinosa
HvBAT4	CAAT-box	CAAT	1116	4	+	Nicotiana glutinosa
HvBAT4	CAAT-box	CCAAT	1129	5	+	Arabidopsis thaliana
HvBAT4	CAAT-box	CAAT	1130	4	+	Nicotiana glutinosa
HvBAT4	CAAT-box	CCAAT	1218	5	-	Arabidopsis thaliana
HvBAT4	CAAT-box	CAAAT	1293	5	+	Pisum sativum
HvBAT4	CAAT-box	CAAAT	1474	5	-	Pisum sativum
HvBAT4	G-box	TACGTG	763	6	+	Arabidopsis thaliana
HvBAT4	G-box	TAACACGTAG	1243	9	+	Brassica oleracea
HvBAT4	G-box	TACGTG	1246	6	-	Arabidopsis thaliana
HvBAT4	STRE	AGGGG	1232	5	-	Arabidopsis thaliana
HvBAT4	CGTCA-motif	CGTCA	456	5	-	Hordeum vulgare
HvBAT4	ABRE3a	TACGTG	763	6	+	Zea mays
HvBAT4	ABRE3a	TACGTG	1246	6	-	Zea mays
HvBAT4	Myb-binding site	CAACAG	90	6	-	Nicotiana tabacum
HvBAT4	Myb-binding site	CAACAG	635	6	-	Nicotiana tabacum
HvBAT4	W box	TTGACC	863	6	+	Arabidopsis thaliana
HvBAT4	W box	TTGACC	1239	6	-	Arabidopsis thaliana
HvBAT5	Myb	CAACTG	963	6	+	Arabidopsis thaliana
HvBAT5	TATA-box	ccTATAAAaa	35	9	+	Arabidopsis thaliana
HvBAT5	TATA-box	TATAA	36	5	-	Arabidopsis thaliana
HvBAT5	TATA-box	TATA	37	4	+	Arabidopsis thaliana
HvBAT5	TATA-box	TACAAAA	73	7	-	Oryza sativa
HvBAT5	TATA-box	taTATAAAg	115	9	-	Lycopersicon esculentum
HvBAT5	TATA-box	TATAAA	116	6	-	Helianthus annuus
HvBAT5	TATA-box	TATATAA	117	7	-	Arabidopsis thaliana
HvBAT5	TATA-box	TATATA	118	6	+	Arabidopsis thaliana
HvBAT5	TATA-box	ATATAA	119	6	+	Brassica oleracea
HvBAT5	TATA-box	TATA	120	4	+	Arabidopsis thaliana
HvBAT5	TATA-box	TATATAA	449	7	-	Arabidopsis thaliana
HvBAT5	TATA-box	TATATA	450	6	+	Arabidopsis thaliana
HvBAT5	TATA-box	ATATAA	451	6	+	Brassica oleracea
HvBAT5	TATA-box	TATA	452	4	+	Arabidopsis thaliana
HvBAT5	TATA-box	ccTATAAAaa	675	9	+	Arabidopsis thaliana
HvBAT5	TATA-box	TATA	831	4	-	Arabidopsis thaliana
HvBAT5	TATA-box	ATATAT	863	6	-	Brassica napus
HvBAT5	TATA-box	TATA	864	4	-	Arabidopsis thaliana
HvBAT5	TATA-box	TATA	877	4	-	Arabidopsis thaliana
HvBAT5	TATA-box	ATTATA	1126	6	+	Brassica napus
HvBAT5	TATA-box	TATAA	1127	5	-	Arabidopsis thaliana
HvBAT5	TATA-box	TATA	1128	4	-	Arabidopsis thaliana
HvBAT5	TATA-box	TATATA	1211	6	-	Arabidopsis thaliana
HvBAT5	TATA-box	TATA	1213	4	-	Arabidopsis thaliana
HvBAT5	TATA-box	ATATAA	1275	6	+	Brassica oleracea
HvBAT5	TATA-box	TATA	1276	4	-	Arabidopsis thaliana
HvBAT5	TATA-box	taTATAAAtc	1315	9	-	Arabidopsis thaliana
HvBAT5	TATA-box	TATACA	1317	6	-	Helianthus annuus
HvBAT5	TATA-box	TATATA	1319	6	-	Arabidopsis thaliana
HvBAT5	TATA-box	TATA	1321	4	-	Arabidopsis thaliana
HvBAT5	TATA-box	ATATAT	1328	6	-	Brassica napus
HvBAT5	TATA-box	TATA	1329	4	-	Arabidopsis thaliana
HvBAT5	TATA-box	taTATAAAtc	1343	9	-	Arabidopsis thaliana
HvBAT5	TATA-box	TATAA	1395	5	-	Arabidopsis thaliana
HvBAT5	TATA-box	TATA	1396	4	-	Arabidopsis thaliana
HvBAT5	TCA-element	CCATCTTTTT	43	9	-	Nicotiana tabacum
HvBAT5	TC-rich repeats	GTTTTCTTAC	981	9	+	Nicotiana tabacum
HvBAT5	TGACG-motif	TGACG	152	5	-	Hordeum vulgare
HvBAT5	TGACG-motif	TGACG	196	5	-	Hordeum vulgare
HvBAT5	TATC-box	TATCCCA	1094	7	-	Oryza sativa
HvBAT5	MYB	CAACCA	661	6	+	Arabidopsis thaliana
HvBAT5	TGA-element	AACGAC	1389	6	+	Brassica oleracea
HvBAT5	O2-site	GATGATGTGG	411	9	-	Zea mays
HvBAT5	GT1-motif	GGTTAA	127	6	+	Arabidopsis thaliana
HvBAT5	GT1-motif	GGTTAA	459	6	+	Arabidopsis thaliana
HvBAT5	GT1-motif	GGTTAA	716	6	-	Arabidopsis thaliana
HvBAT5	WUN-motif	TAATTACTC	346	9	+	Nicotiana glutinosa
HvBAT5		motif_sequence	373	4	-	organism
HvBAT5		motif_sequence	512	4	-	organism
HvBAT5		motif_sequence	526	4	+	organism
HvBAT5		motif_sequence	626	4	+	organism
HvBAT5		motif_sequence	1008	4	+	organism
HvBAT5		motif_sequence	1067	4	+	organism
HvBAT5		motif_sequence	1173	4	-	organism
HvBAT5		motif_sequence	1340	4	-	organism
HvBAT5		motif_sequence	1463	4	-	organism
HvBAT5	WRE3	CCACCT	518	6	+	Pisum sativum
HvBAT5	MYC	CATTTG	905	6	+	Arabidopsis thaliana
HvBAT5	AT~TATA-box	TATATAAA	116	8	-	Arabidopsis thaliana
HvBAT5	AT~TATA-box	TATATA	118	6	+	Arabidopsis thaliana
HvBAT5	AT~TATA-box	TATATA	450	6	+	Arabidopsis thaliana
HvBAT5	AT~TATA-box	TATATA	1211	6	-	Arabidopsis thaliana
HvBAT5	AT~TATA-box	TATATA	1319	6	-	Arabidopsis thaliana
HvBAT5	ABRE	ACGTG	110	5	-	Arabidopsis thaliana
HvBAT5	ABRE	ACGTG	150	5	-	Arabidopsis thaliana
HvBAT5	Unnamed__1	CGTGG	320	5	-	Zea mays
HvBAT5	Unnamed__1	CGTGG	652	5	-	Zea mays
HvBAT5	chs-CMA1a	TTACTTAA	1043	8	+	Daucus carota
HvBAT5	ARE	AAACCA	50	6	-	Zea mays
HvBAT5	ARE	AAACCA	741	6	+	Zea mays
HvBAT5	ARE	AAACCA	754	6	+	Zea mays
HvBAT5	Box 4	ATTAAT	377	6	+	Petroselinum crispum
HvBAT5	Box 4	ATTAAT	1104	6	-	Petroselinum crispum
HvBAT5	TCT-motif	TCTTAC	985	6	+	Arabidopsis thaliana
HvBAT5	DRE1	ACCGAGA	541	7	-	Zea mays
HvBAT5	AT-rich element	ATAGAAATCAA	737	10	+	Glycine max
HvBAT5	AT-rich element	ATAGAAATCAA	1098	10	+	Glycine max
HvBAT5	CGTCA-motif	CGTCA	152	5	+	Hordeum vulgare
HvBAT5	CGTCA-motif	CGTCA	196	5	+	Hordeum vulgare
HvBAT5	W box	TTGACC	920	6	+	Arabidopsis thaliana
HvBAT5	AAGAA-motif	GAAAGAA	158	7	-	Avena sativa
HvBAT5	Box II	TGGTAATAA	249	9	+	Solanum tuberosum
HvBAT5	MBS	CAACTG	963	6	+	Arabidopsis thaliana
HvBAT5	G-box	CACGTC	110	6	+	Zea mays
HvBAT5	G-box	CACGTC	150	6	+	Zea mays
HvBAT5	G-box	CACGAC	321	6	+	Zea mays
HvBAT5	CAAT-box	CAAAT	141	5	-	Pisum sativum
HvBAT5	CAAT-box	CAAT	213	4	+	Nicotiana glutinosa
HvBAT5	CAAT-box	CAAT	240	4	+	Nicotiana glutinosa
HvBAT5	CAAT-box	CAAT	294	4	-	Nicotiana glutinosa
HvBAT5	CAAT-box	CAAT	304	4	-	Nicotiana glutinosa
HvBAT5	CAAT-box	CAAT	340	4	+	Nicotiana glutinosa
HvBAT5	CAAT-box	CAAT	369	4	+	Nicotiana glutinosa
HvBAT5	CAAT-box	CAAAT	400	5	-	Pisum sativum
HvBAT5	CAAT-box	CAAT	524	4	+	Nicotiana glutinosa
HvBAT5	CAAT-box	CAAT	554	4	-	Nicotiana glutinosa
HvBAT5	CAAT-box	CAAT	584	4	+	Nicotiana glutinosa
HvBAT5	CAAT-box	CAAAT	590	5	-	Pisum sativum
HvBAT5	CAAT-box	CAAT	601	4	+	Nicotiana glutinosa
HvBAT5	CAAT-box	CAAT	638	4	+	Nicotiana glutinosa
HvBAT5	CAAT-box	CAAT	668	4	+	Nicotiana glutinosa
HvBAT5	CAAT-box	CCAAT	675	5	+	Arabidopsis thaliana
HvBAT5	CAAT-box	CAAT	676	4	+	Nicotiana glutinosa
HvBAT5	CAAT-box	CAAT	726	4	+	Nicotiana glutinosa
HvBAT5	CAAT-box	CAAT	771	4	+	Nicotiana glutinosa
HvBAT5	CAAT-box	CAAT	804	4	-	Nicotiana glutinosa
HvBAT5	CAAT-box	CCAAT	891	5	-	Arabidopsis thaliana
HvBAT5	CAAT-box	CAAAT	906	5	-	Pisum sativum
HvBAT5	CAAT-box	CAAT	919	4	-	Nicotiana glutinosa
HvBAT5	CAAT-box	CAAAT	950	5	+	Pisum sativum
HvBAT5	CAAT-box	CAAAT	1050	5	-	Pisum sativum
HvBAT5	CAAT-box	CAAT	1056	4	+	Nicotiana glutinosa
HvBAT5	CAAT-box	CAAAT	1087	5	+	Pisum sativum
HvBAT5	CAAT-box	CAAT	1150	4	-	Nicotiana glutinosa
HvBAT5	CAAT-box	CAAT	1425	4	-	Nicotiana glutinosa
HvBAT5	CAAT-box	CAAT	1467	4	-	Nicotiana glutinosa
HvBAT5	STRE	AGGGG	95	5	-	Arabidopsis thaliana
HvBAT5	STRE	AGGGG	998	5	+	Arabidopsis thaliana
HvBAT5	STRE	AGGGG	1242	5	-	Arabidopsis thaliana
HvBAT5	DRE core	GCCGAC	807	6	-	Arabidopsis thaliana
HvBAT5	box S	AGCCACC	516	7	+	Arabidopsis thaliana
HvBAT5	Unnamed__4	CTCC	494	4	+	Petroselinum hortense
HvBAT5	Unnamed__4	CTCC	537	4	+	Petroselinum hortense
HvBAT5	Unnamed__4	CTCC	1217	4	+	Petroselinum hortense
HvBAT5	Unnamed__4	CTCC	1259	4	+	Petroselinum hortense
HvBAT5	Unnamed__4	CTCC	1263	4	+	Petroselinum hortense
HvBAT5	Unnamed__4	CTCC	1409	4	-	Petroselinum hortense
HvBAT5	Unnamed__4	CTCC	1413	4	-	Petroselinum hortense
HvBAT5	as-1	TGACG	152	5	-	Arabidopsis thaliana
HvBAT5	as-1	TGACG	196	5	-	Arabidopsis thaliana
HvBAT6	ABRE4	CACGTA	1265	6	+	Zea mays
HvBAT6	Myb	CAACTG	761	6	-	Arabidopsis thaliana
HvBAT6	Myb	CAACTG	1387	6	+	Arabidopsis thaliana
HvBAT6	CCGTCC-box	CCGTCC	138	6	+	Petroselinum hortense
HvBAT6	TATA-box	TATATA	680	6	+	Arabidopsis thaliana
HvBAT6	TATA-box	ATATAT	681	6	+	Brassica napus
HvBAT6	TATA-box	TATA	682	4	+	Arabidopsis thaliana
HvBAT6	TATA-box	TATA	742	4	+	Arabidopsis thaliana
HvBAT6	TATA-box	ATATAA	857	6	+	Brassica oleracea
HvBAT6	TATA-box	TATA	858	4	-	Arabidopsis thaliana
HvBAT6	TATA-box	TATAAAT	873	7	-	Brassica juncea
HvBAT6	TATA-box	TATAAA	874	6	-	Helianthus annuus
HvBAT6	TATA-box	TATAA	875	5	-	Arabidopsis thaliana
HvBAT6	TATA-box	TATA	876	4	-	Arabidopsis thaliana
HvBAT6	TATA-box	ATATAT	880	6	-	Brassica napus
HvBAT6	TATA-box	TATA	881	4	-	Arabidopsis thaliana
HvBAT6	TATA-box	TATA	984	4	-	Arabidopsis thaliana
HvBAT6	TATA-box	TATA	1051	4	-	Arabidopsis thaliana
HvBAT6	TATA-box	TATA	1059	4	-	Arabidopsis thaliana
HvBAT6	TATA-box	TACAAAA	1138	7	-	Oryza sativa
HvBAT6	TATA-box	TATA	1195	4	-	Arabidopsis thaliana
HvBAT6	TATA-box	ATATAT	1228	6	-	Brassica napus
HvBAT6	TATA-box	TATA	1229	4	-	Arabidopsis thaliana
HvBAT6	TATA-box	ATTATA	1232	6	+	Brassica napus
HvBAT6	TATA-box	TATAA	1233	5	-	Arabidopsis thaliana
HvBAT6	TATA-box	TATA	1234	4	-	Arabidopsis thaliana
HvBAT6	TATA-box	ccTATAAAaa	1419	9	+	Arabidopsis thaliana
HvBAT6	TATA-box	TATA	1421	4	-	Arabidopsis thaliana
HvBAT6	TATA-box	ATATAA	1469	6	+	Brassica oleracea
HvBAT6	TATA-box	TATA	1470	4	-	Arabidopsis thaliana
HvBAT6	TC-rich repeats	GTTTTCTTAC	906	9	-	Nicotiana tabacum
HvBAT6	TCA-element	CCATCTTTTT	1132	9	+	Nicotiana tabacum
HvBAT6	TGACG-motif	TGACG	33	5	-	Hordeum vulgare
HvBAT6	TGACG-motif	TGACG	400	5	-	Hordeum vulgare
HvBAT6	TGACG-motif	TGACG	538	5	+	Hordeum vulgare
HvBAT6	TGACG-motif	TGACG	1188	5	+	Hordeum vulgare
HvBAT6	TGACG-motif	TGACG	1377	5	-	Hordeum vulgare
HvBAT6	MYB	TAACCA	190	6	+	Arabidopsis thaliana
HvBAT6	MYB	TAACCA	313	6	-	Arabidopsis thaliana
HvBAT6	MYB	CAACCA	1032	6	+	Arabidopsis thaliana
HvBAT6		motif_sequence	81	4	-	organism
HvBAT6		motif_sequence	262	4	-	organism
HvBAT6		motif_sequence	282	4	-	organism
HvBAT6		motif_sequence	286	4	+	organism
HvBAT6		motif_sequence	389	4	-	organism
HvBAT6		motif_sequence	503	4	+	organism
HvBAT6		motif_sequence	505	4	-	organism
HvBAT6		motif_sequence	850	4	-	organism
HvBAT6		motif_sequence	1067	4	+	organism
HvBAT6		motif_sequence	1342	4	-	organism
HvBAT6	Unnamed__2	CCCCGG	275	6	-	Zea mays
HvBAT6	TCCC-motif	TCTCCCT	1340	7	-	Spinacia oleracea
HvBAT6	GATA-motif	GATAGGA	175	7	+	Arabidopsis thaliana
HvBAT6	MYC	CATGTG	93	6	-	Arabidopsis thaliana
HvBAT6	MYC	CATGTG	104	6	-	Arabidopsis thaliana
HvBAT6	MYC	CATGTG	285	6	+	Arabidopsis thaliana
HvBAT6	MYC	CATTTG	418	6	-	Arabidopsis thaliana
HvBAT6	MYC	CATTTG	803	6	+	Arabidopsis thaliana
HvBAT6	MYC	CATGTG	1324	6	-	Arabidopsis thaliana
HvBAT6	AT~TATA-box	TATATA	680	6	+	Arabidopsis thaliana
HvBAT6	ABRE	ACGTG	113	5	+	Arabidopsis thaliana
HvBAT6	ABRE	ACGTG	1265	5	-	Arabidopsis thaliana
HvBAT6	ABRE	CACGTG	1304	6	-	Arabidopsis thaliana
HvBAT6	ABRE	ACGTG	1305	5	+	Arabidopsis thaliana
HvBAT6	Unnamed__1	CGTGG	629	5	+	Zea mays
HvBAT6	Unnamed__1	CGTGG	1284	5	+	Zea mays
HvBAT6	chs-CMA1a	TTACTTAA	866	8	+	Daucus carota
HvBAT6	G-Box	CACGTG	1304	6	-	Pisum sativum
HvBAT6	GCN4_motif	TGAGTCA	375	7	-	Oryza sativa
HvBAT6	ARE	AAACCA	25	6	+	Zea mays
HvBAT6	ARE	AAACCA	1428	6	+	Zea mays
HvBAT6	ABRE3a	TACGTG	1265	6	-	Zea mays
HvBAT6	CGTCA-motif	CGTCA	33	5	+	Hordeum vulgare
HvBAT6	CGTCA-motif	CGTCA	400	5	+	Hordeum vulgare
HvBAT6	CGTCA-motif	CGTCA	538	5	-	Hordeum vulgare
HvBAT6	CGTCA-motif	CGTCA	1188	5	-	Hordeum vulgare
HvBAT6	CGTCA-motif	CGTCA	1377	5	+	Hordeum vulgare
HvBAT6	W box	TTGACC	51	6	-	Arabidopsis thaliana
HvBAT6	AAGAA-motif	GAAAGAA	431	7	-	Avena sativa
HvBAT6	A-box	CCGTCC	138	6	+	Petroselinum crispum
HvBAT6	MYB-like sequence	TAACCA	190	6	+	Arabidopsis thaliana
HvBAT6	MYB-like sequence	TAACCA	313	6	-	Arabidopsis thaliana
HvBAT6	MBS	CAACTG	761	6	-	Arabidopsis thaliana
HvBAT6	MBS	CAACTG	1387	6	+	Arabidopsis thaliana
HvBAT6	CAAT-box	CAAT	54	4	+	Nicotiana glutinosa
HvBAT6	CAAT-box	CAAT	380	4	+	Nicotiana glutinosa
HvBAT6	CAAT-box	CAAAT	418	5	+	Pisum sativum
HvBAT6	CAAT-box	CAAAT	521	5	-	Pisum sativum
HvBAT6	CAAT-box	CAAT	556	4	+	Nicotiana glutinosa
HvBAT6	CAAT-box	CAAT	690	4	+	Nicotiana glutinosa
HvBAT6	CAAT-box	CAAT	733	4	-	Nicotiana glutinosa
HvBAT6	CAAT-box	CAAAT	804	5	-	Pisum sativum
HvBAT6	CAAT-box	CAAT	1026	4	+	Nicotiana glutinosa
HvBAT6	CAAT-box	CCAAT	1035	5	+	Arabidopsis thaliana
HvBAT6	CAAT-box	CAAT	1036	4	+	Nicotiana glutinosa
HvBAT6	G-box	CACGAC	88	6	+	Zea mays
HvBAT6	G-box	CACGTC	112	6	-	Zea mays
HvBAT6	G-box	TACGTG	1265	6	-	Arabidopsis thaliana
HvBAT6	G-box	CACGTG	1304	6	-	Arabidopsis thaliana
HvBAT6	STRE	AGGGG	821	5	-	Arabidopsis thaliana
HvBAT6	GC-motif	CCCCCG	485	6	-	Zea mays
HvBAT6	CCGTCC motif	CCGTCC	138	6	+	Nicotiana tabacum
HvBAT6	Unnamed__4	CTCC	18	4	-	Petroselinum hortense
HvBAT6	Unnamed__4	CTCC	204	4	-	Petroselinum hortense
HvBAT6	Unnamed__4	CTCC	279	4	-	Petroselinum hortense
HvBAT6	Unnamed__4	CTCC	415	4	+	Petroselinum hortense
HvBAT6	Unnamed__4	CTCC	462	4	-	Petroselinum hortense
HvBAT6	Unnamed__4	CTCC	583	4	-	Petroselinum hortense
HvBAT6	Unnamed__4	CTCC	662	4	+	Petroselinum hortense
HvBAT6	Unnamed__4	CTCC	750	4	-	Petroselinum hortense
HvBAT6	Unnamed__4	CTCC	1047	4	+	Petroselinum hortense
HvBAT6	Unnamed__4	CTCC	1200	4	-	Petroselinum hortense
HvBAT6	Unnamed__4	CTCC	1210	4	+	Petroselinum hortense
HvBAT6	Unnamed__4	CTCC	1338	4	-	Petroselinum hortense
HvBAT6	Unnamed__4	CTCC	1342	4	-	Petroselinum hortense
HvBAT6	Unnamed__4	CTCC	1365	4	+	Petroselinum hortense
HvBAT6	Unnamed__4	CTCC	1445	4	-	Petroselinum hortense
HvBAT6	dOCT	CACGGATC	1461	8	+	Zea mays
HvBAT6	as-1	TGACG	33	5	-	Arabidopsis thaliana
HvBAT6	as-1	TGACG	400	5	-	Arabidopsis thaliana
HvBAT6	as-1	TGACG	538	5	+	Arabidopsis thaliana
HvBAT6	as-1	TGACG	1188	5	+	Arabidopsis thaliana
HvBAT6	as-1	TGACG	1377	5	-	Arabidopsis thaliana

## Sheet: Table S5
Supplementary Table S5: Transcription factor binding site within the promoter regions of PAs transporter genes of barley
Sequence ID	Gene name	TFBS ID	Posistion	Strand	Binding sequence	TF family	TF ID
HORVU.MOREX.r3.5HG0424430.336	HvPUT1	TFmatrixID_0004	1007	+	tAATATattt	AT-Hook	AT4G14465
HORVU.MOREX.r3.5HG0424430.337	HvPUT1	TFmatrixID_0004	1007	-	taatATATTt	AT-Hook	AT4G14465
HORVU.MOREX.r3.5HG0424430.338	HvPUT1	TFmatrixID_0005	1037	-	tacTTAATta	AT-Hook	AT4G14465
HORVU.MOREX.r3.5HG0424430.339	HvPUT1	TFmatrixID_0007	1037	-	tactTAATTa	AT-Hook	AT4G35390
HORVU.MOREX.r3.5HG0424430.340	HvPUT1	TFmatrixID_0008	652	-	gaaaATATTt	AT-Hook	AT4G35390
HORVU.MOREX.r3.5HG0424430.341	HvPUT1	TFmatrixID_0008	1007	+	tAATATattt	AT-Hook	AT4G35390
HORVU.MOREX.r3.5HG0424430.342	HvPUT1	TFmatrixID_0008	1007	-	taatATATTt	AT-Hook	AT4G35390
HORVU.MOREX.r3.5HG0424430.343	HvPUT1	TFmatrixID_0015	1490	+	aaGGATCctt	MYB; ARR-B	AT1G67710
HORVU.MOREX.r3.5HG0424430.344	HvPUT1	TFmatrixID_0015	1490	-	aagGATCCtt	MYB; ARR-B	AT1G67710
HORVU.MOREX.r3.5HG0424430.345	HvPUT1	TFmatrixID_0018	1490	+	aaGGATCctt	Myb/SANT; MYB; ARR-B	AT2G01760
HORVU.MOREX.r3.5HG0424430.346	HvPUT1	TFmatrixID_0018	1490	-	aagGATCCtt	Myb/SANT; MYB; ARR-B	AT2G01760
HORVU.MOREX.r3.5HG0424430.347	HvPUT1	TFmatrixID_0030	53	+	aAGATAcacg	MYB-related	AT2G46830
HORVU.MOREX.r3.5HG0424430.348	HvPUT1	TFmatrixID_0045	1094	+	ttTCTAGaac	HSF	AT3G24520
HORVU.MOREX.r3.5HG0424430.349	HvPUT1	TFmatrixID_0045	1094	-	tttCTAGAac	HSF	AT3G24520
HORVU.MOREX.r3.5HG0424430.350	HvPUT1	TFmatrixID_0052	1153	+	TCATTacacttatatt	bZIP	P12959
HORVU.MOREX.r3.5HG0424430.351	HvPUT1	TFmatrixID_0060	69	-	cCGCCGtc	AP2; ERF;ERF	AT1G03800;AT1G04370;AT1G43160;AT1G53910;AT2G40220;AT2G46310;AT2G47520;AT3G16770;AT3G61630;AT4G11140;AT4G13620;AT4G34410;AT5G07310;AT5G44210;AT5G50080;AT5G61890;AT5G64750;BRADI1G71740;BRADI1G72450;BRADI1G72457;BRADI2G11890;BRADI2G21060;BRADI2G24170;BRADI2G52370;BRADI2G56140;BRADI3G27690;BRADI3G38140;BRADI3G41543;BRADI3G50490;BRADI3G58015;BRADI3G60120;BRADI4G29010;BRADI4G31040;BRADI5G08380;BRADI5G2…
HORVU.MOREX.r3.5HG0424430.352	HvPUT1	TFmatrixID_0082	69	+	cCGCCGtct	AP2; ERF;ERF	AT1G04370;AT1G53910;AT3G23220;AT3G61630;AT4G17500;AT4G18450;AT4G34410;AT5G07310;AT5G50080;AT5G61590;AT5G61890;AT5G64750;BRADI1G75040;BRADI2G11890;BRADI2G24170;BRADI2G56140;BRADI3G27690;BRADI3G41543;BRADI3G50490;BRADI5G08380;BRADI5G17480;BRADI5G17490;BRADI5G25570;Glyma01g41520.1;Glyma02g00870.1;Glyma02g00890.1;Glyma02g07310.1;Glyma02g08840.1;Glyma02g14940.1;Glyma02g46340.1;Glyma03g26310.1;Glyma03g…
HORVU.MOREX.r3.5HG0424430.353	HvPUT1	TFmatrixID_0089	969	+	gtgCAACAgtat	AP2; B3; RAV	AT1G13260
HORVU.MOREX.r3.5HG0424430.354	HvPUT1	TFmatrixID_0111	53	+	aagataCACGTtacctcc	bHLH	AT1G09530
HORVU.MOREX.r3.5HG0424430.355	HvPUT1	TFmatrixID_0123	969	-	gtgCAACAgt	AP2; B3; RAV	AT1G13260
HORVU.MOREX.r3.5HG0424430.356	HvPUT1	TFmatrixID_0126	971	-	gCAACAgt	AP2; B3; RAV	AT3G25730
HORVU.MOREX.r3.5HG0424430.357	HvPUT1	TFmatrixID_0129	634	-	AATTTtttt	AT-Hook	AT1G14900;AT1G48610;Glyma11g33690.1;POPTR_0004s08590;POPTR_0017s02940;Sb07g020920;GRMZM2G004878;GRMZM2G106133
HORVU.MOREX.r3.5HG0424430.358	HvPUT1	TFmatrixID_0130	1008	+	aATATAtttc	AT-Hook	AT1G19485;AT1G48610;AT4G17950;BRADI3G40180;Glyma06g01700.1;Glyma0856s00200.1;Glyma09g39650.1;Glyma18g46540.1;Os06g0326000;Os07g0184800;Os08g0512400;Os09g0491708;POPTR_0004s20060;Sb02g028500;Sb04g037880;GRMZM2G089562;GRMZM2G106133;GRMZM2G123887;GRMZM2G159926;GRMZM2G164489
HORVU.MOREX.r3.5HG0424430.359	HvPUT1	TFmatrixID_0131	715	-	TTTATttat	AT-Hook	AT1G19485;AT1G48610;BRADI3G40180;BRADI3G55950;Glyma06g01700.1;Glyma0856s00200.1;Glyma09g39650.1;Glyma18g46540.1;Os06g0326000;Os07g0184800;Os08g0512400;Os09g0491708;POPTR_0004s20060;Sb02g028500;Sb04g037880;GRMZM2G089562;GRMZM2G106133;GRMZM2G123887;GRMZM2G159926;GRMZM2G164489
HORVU.MOREX.r3.5HG0424430.360	HvPUT1	TFmatrixID_0131	719	-	TTTATtcaa	AT-Hook	AT1G19485;AT1G48610;BRADI3G40180;BRADI3G55950;Glyma06g01700.1;Glyma0856s00200.1;Glyma09g39650.1;Glyma18g46540.1;Os06g0326000;Os07g0184800;Os08g0512400;Os09g0491708;POPTR_0004s20060;Sb02g028500;Sb04g037880;GRMZM2G089562;GRMZM2G106133;GRMZM2G123887;GRMZM2G159926;GRMZM2G164489
HORVU.MOREX.r3.5HG0424430.361	HvPUT1	TFmatrixID_0131	823	-	TTTATttgg	AT-Hook	AT1G19485;AT1G48610;BRADI3G40180;BRADI3G55950;Glyma06g01700.1;Glyma0856s00200.1;Glyma09g39650.1;Glyma18g46540.1;Os06g0326000;Os07g0184800;Os08g0512400;Os09g0491708;POPTR_0004s20060;Sb02g028500;Sb04g037880;GRMZM2G089562;GRMZM2G106133;GRMZM2G123887;GRMZM2G159926;GRMZM2G164489
HORVU.MOREX.r3.5HG0424430.362	HvPUT1	TFmatrixID_0131	1303	+	ctgaATAAA	AT-Hook	AT1G19485;AT1G48610;BRADI3G40180;BRADI3G55950;Glyma06g01700.1;Glyma0856s00200.1;Glyma09g39650.1;Glyma18g46540.1;Os06g0326000;Os07g0184800;Os08g0512400;Os09g0491708;POPTR_0004s20060;Sb02g028500;Sb04g037880;GRMZM2G089562;GRMZM2G106133;GRMZM2G123887;GRMZM2G159926;GRMZM2G164489
HORVU.MOREX.r3.5HG0424430.363	HvPUT1	TFmatrixID_0131	1398	+	aggaATAAA	AT-Hook	AT1G19485;AT1G48610;BRADI3G40180;BRADI3G55950;Glyma06g01700.1;Glyma0856s00200.1;Glyma09g39650.1;Glyma18g46540.1;Os06g0326000;Os07g0184800;Os08g0512400;Os09g0491708;POPTR_0004s20060;Sb02g028500;Sb04g037880;GRMZM2G089562;GRMZM2G106133;GRMZM2G123887;GRMZM2G159926;GRMZM2G164489
HORVU.MOREX.r3.5HG0424430.364	HvPUT1	TFmatrixID_0133	638	-	TTTTTtccg	AT-Hook	Os01g0835600;Sb0621s002020;GRMZM2G008456;GRMZM2G127034
HORVU.MOREX.r3.5HG0424430.365	HvPUT1	TFmatrixID_0133	639	-	TTTTTccgt	AT-Hook	Os01g0835600;Sb0621s002020;GRMZM2G008456;GRMZM2G127034
HORVU.MOREX.r3.5HG0424430.366	HvPUT1	TFmatrixID_0133	778	+	accgAAAAA	AT-Hook	Os01g0835600;Sb0621s002020;GRMZM2G008456;GRMZM2G127034
HORVU.MOREX.r3.5HG0424430.367	HvPUT1	TFmatrixID_0133	1189	-	TTTTTcggt	AT-Hook	Os01g0835600;Sb0621s002020;GRMZM2G008456;GRMZM2G127034
HORVU.MOREX.r3.5HG0424430.368	HvPUT1	TFmatrixID_0139	1007	-	TAATAtattt	AT-Hook	AT4G21895;AT5G62260;Glyma04g10960.1;Glyma10g07550.1;Glyma13g21430.1;POPTR_0002s10560;POPTR_0005s17920;GRMZM2G150950
HORVU.MOREX.r3.5HG0424430.369	HvPUT1	TFmatrixID_0140	635	-	ATTTTttt	AT-Hook	AT4G21895;AT5G62260;Glyma04g10960.1;Glyma10g07550.1;Glyma13g21430.1;POPTR_0002s10560;POPTR_0005s17920;GRMZM2G150950
HORVU.MOREX.r3.5HG0424430.370	HvPUT1	TFmatrixID_0143	719	-	tTTATTcaac	AT-Hook	GRMZM2G008456
HORVU.MOREX.r3.5HG0424430.371	HvPUT1	TFmatrixID_0143	823	-	tTTATTtggt	AT-Hook	GRMZM2G008456
HORVU.MOREX.r3.5HG0424430.372	HvPUT1	TFmatrixID_0143	1260	-	aTTATTtcaa	AT-Hook	GRMZM2G008456
HORVU.MOREX.r3.5HG0424430.373	HvPUT1	TFmatrixID_0143	1302	+	actgAATAAa	AT-Hook	GRMZM2G008456
HORVU.MOREX.r3.5HG0424430.374	HvPUT1	TFmatrixID_0143	1397	+	aaggAATAAa	AT-Hook	GRMZM2G008456
HORVU.MOREX.r3.5HG0424430.375	HvPUT1	TFmatrixID_0144	1082	+	atgaTATTAagg	AT-Hook	AT4G21895;AT5G62260;Glyma04g10960.1;Glyma10g07550.1;Glyma13g21430.1;POPTR_0002s10560;POPTR_0005s17920;GRMZM2G150950
HORVU.MOREX.r3.5HG0424430.376	HvPUT1	TFmatrixID_0144	1227	-	gatTAATAtggt	AT-Hook	AT4G21895;AT5G62260;Glyma04g10960.1;Glyma10g07550.1;Glyma13g21430.1;POPTR_0002s10560;POPTR_0005s17920;GRMZM2G150950
HORVU.MOREX.r3.5HG0424430.377	HvPUT1	TFmatrixID_0146	1109	-	ATTATcttt	AT-Hook	AT4G21895;AT5G62260;Glyma04g10960.1;Glyma10g07550.1;Glyma13g21430.1;Os07g0184800;POPTR_0002s10560;POPTR_0005s17920;GRMZM2G150950
HORVU.MOREX.r3.5HG0424430.378	HvPUT1	TFmatrixID_0146	1260	-	ATTATttca	AT-Hook	AT4G21895;AT5G62260;Glyma04g10960.1;Glyma10g07550.1;Glyma13g21430.1;Os07g0184800;POPTR_0002s10560;POPTR_0005s17920;GRMZM2G150950
HORVU.MOREX.r3.5HG0424430.379	HvPUT1	TFmatrixID_0148	634	-	aATTTTtt	AT-Hook	AT1G19485;AT1G48610;BRADI3G40180;Glyma06g01700.1;Glyma0856s00200.1;Glyma09g39650.1;Glyma18g46540.1;Os02g0824300;Os06g0326000;Os07g0184800;Os08g0512400;Os09g0491708;POPTR_0004s20060;Sb02g028500;Sb04g037880;GRMZM2G089562;GRMZM2G106133;GRMZM2G123887;GRMZM2G159926;GRMZM2G164489
HORVU.MOREX.r3.5HG0424430.380	HvPUT1	TFmatrixID_0149	652	-	gaAAATAttt	AT-Hook	BRADI2G14100;Os11g0602200
HORVU.MOREX.r3.5HG0424430.381	HvPUT1	TFmatrixID_0149	654	+	aaaTATTTgg	AT-Hook	BRADI2G14100;Os11g0602200
HORVU.MOREX.r3.5HG0424430.382	HvPUT1	TFmatrixID_0149	1009	+	ataTATTTca	AT-Hook	BRADI2G14100;Os11g0602200
HORVU.MOREX.r3.5HG0424430.383	HvPUT1	TFmatrixID_0150	653	+	aaAATATttg	AT-Hook	Os01g0835600;Sb0621s002020;GRMZM2G008456;GRMZM2G127034
HORVU.MOREX.r3.5HG0424430.384	HvPUT1	TFmatrixID_0150	653	-	aaaATATTtg	AT-Hook	Os01g0835600;Sb0621s002020;GRMZM2G008456;GRMZM2G127034
HORVU.MOREX.r3.5HG0424430.385	HvPUT1	TFmatrixID_0152	634	-	AATTTtt	AT-Hook	AT1G19485;AT1G48610;Glyma0856s00200.1;Glyma09g39650.1;Glyma18g46540.1;Os06g0326000;POPTR_0004s20060;Sb04g037880;GRMZM2G089562;GRMZM2G106133;GRMZM2G123887;GRMZM2G164489
HORVU.MOREX.r3.5HG0424430.386	HvPUT1	TFmatrixID_0154	653	+	aAAATAtt	AT-Hook	AT4G21895;AT5G62260;Glyma04g10960.1;Glyma10g07550.1;Glyma13g21430.1;Os07g0184800;POPTR_0002s10560;POPTR_0005s17920;GRMZM2G150950
HORVU.MOREX.r3.5HG0424430.387	HvPUT1	TFmatrixID_0174	134	+	GCCCGtcc	bHLH	AT1G10120;AT1G18400;AT1G25330;AT1G26260;AT1G68920;AT1G73830;AT2G24260;AT3G07340;AT3G23690;AT4G30980;AT4G34530;AT5G48560;AT5G50915;AT5G58010;AT5G62610;AT2G42300;AT3G57800;BRADI1G05037;BRADI1G09960;BRADI1G35990;BRADI1G43650;BRADI1G46700;BRADI1G47350;BRADI1G54690;BRADI1G69190;BRADI2G39970;BRADI2G58630;BRADI3G38890;BRADI3G40860;BRADI3G41510;BRADI3G46200;BRADI3G52790;BRADI3G54070;BRADI4G19577;BRADI4G3…
HORVU.MOREX.r3.5HG0424430.388	HvPUT1	TFmatrixID_0174	134	-	gccCGTCC	bHLH	AT1G10120;AT1G18400;AT1G25330;AT1G26260;AT1G68920;AT1G73830;AT2G24260;AT3G07340;AT3G23690;AT4G30980;AT4G34530;AT5G48560;AT5G50915;AT5G58010;AT5G62610;AT2G42300;AT3G57800;BRADI1G05037;BRADI1G09960;BRADI1G35990;BRADI1G43650;BRADI1G46700;BRADI1G47350;BRADI1G54690;BRADI1G69190;BRADI2G39970;BRADI2G58630;BRADI3G38890;BRADI3G40860;BRADI3G41510;BRADI3G46200;BRADI3G52790;BRADI3G54070;BRADI4G19577;BRADI4G3…
HORVU.MOREX.r3.5HG0424430.389	HvPUT1	TFmatrixID_0174	965	-	gtaAGTGC	bHLH	AT1G10120;AT1G18400;AT1G25330;AT1G26260;AT1G68920;AT1G73830;AT2G24260;AT3G07340;AT3G23690;AT4G30980;AT4G34530;AT5G48560;AT5G50915;AT5G58010;AT5G62610;AT2G42300;AT3G57800;BRADI1G05037;BRADI1G09960;BRADI1G35990;BRADI1G43650;BRADI1G46700;BRADI1G47350;BRADI1G54690;BRADI1G69190;BRADI2G39970;BRADI2G58630;BRADI3G38890;BRADI3G40860;BRADI3G41510;BRADI3G46200;BRADI3G52790;BRADI3G54070;BRADI4G19577;BRADI4G3…
HORVU.MOREX.r3.5HG0424430.390	HvPUT1	TFmatrixID_0174	1023	-	ccaTGTGC	bHLH	AT1G10120;AT1G18400;AT1G25330;AT1G26260;AT1G68920;AT1G73830;AT2G24260;AT3G07340;AT3G23690;AT4G30980;AT4G34530;AT5G48560;AT5G50915;AT5G58010;AT5G62610;AT2G42300;AT3G57800;BRADI1G05037;BRADI1G09960;BRADI1G35990;BRADI1G43650;BRADI1G46700;BRADI1G47350;BRADI1G54690;BRADI1G69190;BRADI2G39970;BRADI2G58630;BRADI3G38890;BRADI3G40860;BRADI3G41510;BRADI3G46200;BRADI3G52790;BRADI3G54070;BRADI4G19577;BRADI4G3…
HORVU.MOREX.r3.5HG0424430.391	HvPUT1	TFmatrixID_0174	1170	-	acaAGTGC	bHLH	AT1G10120;AT1G18400;AT1G25330;AT1G26260;AT1G68920;AT1G73830;AT2G24260;AT3G07340;AT3G23690;AT4G30980;AT4G34530;AT5G48560;AT5G50915;AT5G58010;AT5G62610;AT2G42300;AT3G57800;BRADI1G05037;BRADI1G09960;BRADI1G35990;BRADI1G43650;BRADI1G46700;BRADI1G47350;BRADI1G54690;BRADI1G69190;BRADI2G39970;BRADI2G58630;BRADI3G38890;BRADI3G40860;BRADI3G41510;BRADI3G46200;BRADI3G52790;BRADI3G54070;BRADI4G19577;BRADI4G3…
HORVU.MOREX.r3.5HG0424430.392	HvPUT1	TFmatrixID_0174	1430	+	GTACGggc	bHLH	AT1G10120;AT1G18400;AT1G25330;AT1G26260;AT1G68920;AT1G73830;AT2G24260;AT3G07340;AT3G23690;AT4G30980;AT4G34530;AT5G48560;AT5G50915;AT5G58010;AT5G62610;AT2G42300;AT3G57800;BRADI1G05037;BRADI1G09960;BRADI1G35990;BRADI1G43650;BRADI1G46700;BRADI1G47350;BRADI1G54690;BRADI1G69190;BRADI2G39970;BRADI2G58630;BRADI3G38890;BRADI3G40860;BRADI3G41510;BRADI3G46200;BRADI3G52790;BRADI3G54070;BRADI4G19577;BRADI4G3…
HORVU.MOREX.r3.5HG0424430.393	HvPUT1	TFmatrixID_0174	1430	-	gtaCGGGC	bHLH	AT1G10120;AT1G18400;AT1G25330;AT1G26260;AT1G68920;AT1G73830;AT2G24260;AT3G07340;AT3G23690;AT4G30980;AT4G34530;AT5G48560;AT5G50915;AT5G58010;AT5G62610;AT2G42300;AT3G57800;BRADI1G05037;BRADI1G09960;BRADI1G35990;BRADI1G43650;BRADI1G46700;BRADI1G47350;BRADI1G54690;BRADI1G69190;BRADI2G39970;BRADI2G58630;BRADI3G38890;BRADI3G40860;BRADI3G41510;BRADI3G46200;BRADI3G52790;BRADI3G54070;BRADI4G19577;BRADI4G3…
HORVU.MOREX.r3.5HG0424430.394	HvPUT1	TFmatrixID_0182	54	-	agataCACGTtac	bZIP	AT1G45249;AT3G19290;BRADI1G46060;BRADI3G38200;BRADI3G57960;BRADI4G32090;Glyma02g14880.1;Glyma04g04170.1;Glyma04g14840.1;Glyma06g04350.1;Glyma06g47220.1;Glyma07g33600.1;Glyma10g08370.1;Glyma12g30980.1;Glyma13g39340.1;Glyma19g30230.1;Glyma19g37910.1;Os01g0859300;Os02g0766700;Os06g0211200;Os09g0456200;POPTR_0002s12710;POPTR_0004s14790;POPTR_0006s08300;POPTR_0009s10400;POPTR_0009s16610;POPTR_0014s028…
HORVU.MOREX.r3.5HG0424430.395	HvPUT1	TFmatrixID_0188	606	+	cGACAGccat	bZIP	AT1G06070;AT2G31370;AT2G40620;BRADI1G17700;BRADI4G24937;Glyma04g40010.1;Glyma12g04050.1;Glyma12g05520.1;Glyma13g42030.1;Glyma14g38460.1;Glyma14g40580.1;Glyma15g03350.1;Glyma17g37510.1;Os03g0127500;Os03g0336200;POPTR_0013s15280;Sb01g048710;Sb02g030170;Sb05g003810;Sb08g003940;GRMZM2G037910;GRMZM2G043600;GRMZM2G062391;GRMZM2G079365;GRMZM2G112483;GRMZM2G118393;GRMZM2G136266;GRMZM2G146020;GRMZM2G14904…
HORVU.MOREX.r3.5HG0424430.396	HvPUT1	TFmatrixID_0189	58	+	aCACGTtacc	bZIP	AT2G40950;AT3G56660;BRADI1G19702;BRADI2G25400;Glyma19g30680.1;Os05g0411300;Os07g0644100;POPTR_0016s03220;Sb02g041070;Sb04g024720;Sb09g020320;GRMZM2G045236;GRMZM2G060109
HORVU.MOREX.r3.5HG0424430.397	HvPUT1	TFmatrixID_0193	58	+	ACACGtta	bZIP	AT3G19290;AT4G34000;BRADI1G46060;BRADI2G21820;BRADI2G24120;BRADI2G53060;BRADI3G00300;BRADI3G38200;BRADI3G57960;BRADI4G32090;Glyma02g14880.1;Glyma04g04170.1;Glyma06g04350.1;Glyma07g33600.1;Glyma10g08370.1;Glyma12g30980.1;Glyma13g39340.1;Glyma19g30230.1;Glyma19g37910.1;Os02g0766700;Os05g0489700;Os06g0211200;Os09g0456200;POPTR_0002s12710;POPTR_0004s14790;POPTR_0006s08300;POPTR_0009s10400;POPTR_0009s…
HORVU.MOREX.r3.5HG0424430.398	HvPUT1	TFmatrixID_0193	374	+	ACACGgct	bZIP	AT3G19290;AT4G34000;BRADI1G46060;BRADI2G21820;BRADI2G24120;BRADI2G53060;BRADI3G00300;BRADI3G38200;BRADI3G57960;BRADI4G32090;Glyma02g14880.1;Glyma04g04170.1;Glyma06g04350.1;Glyma07g33600.1;Glyma10g08370.1;Glyma12g30980.1;Glyma13g39340.1;Glyma19g30230.1;Glyma19g37910.1;Os02g0766700;Os05g0489700;Os06g0211200;Os09g0456200;POPTR_0002s12710;POPTR_0004s14790;POPTR_0006s08300;POPTR_0009s10400;POPTR_0009s…
HORVU.MOREX.r3.5HG0424430.399	HvPUT1	TFmatrixID_0193	588	+	CCACGagt	bZIP	AT3G19290;AT4G34000;BRADI1G46060;BRADI2G21820;BRADI2G24120;BRADI2G53060;BRADI3G00300;BRADI3G38200;BRADI3G57960;BRADI4G32090;Glyma02g14880.1;Glyma04g04170.1;Glyma06g04350.1;Glyma07g33600.1;Glyma10g08370.1;Glyma12g30980.1;Glyma13g39340.1;Glyma19g30230.1;Glyma19g37910.1;Os02g0766700;Os05g0489700;Os06g0211200;Os09g0456200;POPTR_0002s12710;POPTR_0004s14790;POPTR_0006s08300;POPTR_0009s10400;POPTR_0009s…
HORVU.MOREX.r3.5HG0424430.400	HvPUT1	TFmatrixID_0193	588	-	ccaCGAGT	bZIP	AT3G19290;AT4G34000;BRADI1G46060;BRADI2G21820;BRADI2G24120;BRADI2G53060;BRADI3G00300;BRADI3G38200;BRADI3G57960;BRADI4G32090;Glyma02g14880.1;Glyma04g04170.1;Glyma06g04350.1;Glyma07g33600.1;Glyma10g08370.1;Glyma12g30980.1;Glyma13g39340.1;Glyma19g30230.1;Glyma19g37910.1;Os02g0766700;Os05g0489700;Os06g0211200;Os09g0456200;POPTR_0002s12710;POPTR_0004s14790;POPTR_0006s08300;POPTR_0009s10400;POPTR_0009s…
HORVU.MOREX.r3.5HG0424430.401	HvPUT1	TFmatrixID_0193	727	+	ACACAttt	bZIP	AT3G19290;AT4G34000;BRADI1G46060;BRADI2G21820;BRADI2G24120;BRADI2G53060;BRADI3G00300;BRADI3G38200;BRADI3G57960;BRADI4G32090;Glyma02g14880.1;Glyma04g04170.1;Glyma06g04350.1;Glyma07g33600.1;Glyma10g08370.1;Glyma12g30980.1;Glyma13g39340.1;Glyma19g30230.1;Glyma19g37910.1;Os02g0766700;Os05g0489700;Os06g0211200;Os09g0456200;POPTR_0002s12710;POPTR_0004s14790;POPTR_0006s08300;POPTR_0009s10400;POPTR_0009s…
HORVU.MOREX.r3.5HG0424430.402	HvPUT1	TFmatrixID_0193	990	+	ACACAttt	bZIP	AT3G19290;AT4G34000;BRADI1G46060;BRADI2G21820;BRADI2G24120;BRADI2G53060;BRADI3G00300;BRADI3G38200;BRADI3G57960;BRADI4G32090;Glyma02g14880.1;Glyma04g04170.1;Glyma06g04350.1;Glyma07g33600.1;Glyma10g08370.1;Glyma12g30980.1;Glyma13g39340.1;Glyma19g30230.1;Glyma19g37910.1;Os02g0766700;Os05g0489700;Os06g0211200;Os09g0456200;POPTR_0002s12710;POPTR_0004s14790;POPTR_0006s08300;POPTR_0009s10400;POPTR_0009s…
HORVU.MOREX.r3.5HG0424430.403	HvPUT1	TFmatrixID_0193	1158	+	ACACTtat	bZIP	AT3G19290;AT4G34000;BRADI1G46060;BRADI2G21820;BRADI2G24120;BRADI2G53060;BRADI3G00300;BRADI3G38200;BRADI3G57960;BRADI4G32090;Glyma02g14880.1;Glyma04g04170.1;Glyma06g04350.1;Glyma07g33600.1;Glyma10g08370.1;Glyma12g30980.1;Glyma13g39340.1;Glyma19g30230.1;Glyma19g37910.1;Os02g0766700;Os05g0489700;Os06g0211200;Os09g0456200;POPTR_0002s12710;POPTR_0004s14790;POPTR_0006s08300;POPTR_0009s10400;POPTR_0009s…
HORVU.MOREX.r3.5HG0424430.404	HvPUT1	TFmatrixID_0193	1170	+	ACAAGtgc	bZIP	AT3G19290;AT4G34000;BRADI1G46060;BRADI2G21820;BRADI2G24120;BRADI2G53060;BRADI3G00300;BRADI3G38200;BRADI3G57960;BRADI4G32090;Glyma02g14880.1;Glyma04g04170.1;Glyma06g04350.1;Glyma07g33600.1;Glyma10g08370.1;Glyma12g30980.1;Glyma13g39340.1;Glyma19g30230.1;Glyma19g37910.1;Os02g0766700;Os05g0489700;Os06g0211200;Os09g0456200;POPTR_0002s12710;POPTR_0004s14790;POPTR_0006s08300;POPTR_0009s10400;POPTR_0009s…
HORVU.MOREX.r3.5HG0424430.405	HvPUT1	TFmatrixID_0194	56	+	ataCACGTta	bZIP	AT2G35530;AT4G36730;BRADI1G54180;BRADI1G68560;BRADI2G15940;BRADI2G45567;BRADI3G02730;BRADI4G39630;Glyma01g01740.1;Glyma01g38380.1;Glyma02g06550.1;Glyma03g41590.1;Glyma08g34280.1;Glyma09g34170.1;Glyma16g03190.1;Glyma16g15810.1;Glyma16g25600.1;Glyma19g44190.1;Os01g0658900;Os02g0128200;Os05g0569300;Os07g0209800;Os12g0233800;POPTR_0001s01840;POPTR_0003s09630;POPTR_0005s12750;POPTR_0007s12460;POPTR_00…
HORVU.MOREX.r3.5HG0424430.406	HvPUT1	TFmatrixID_0211	437	-	gAGTGTa	C2H2	AT1G27730;AT3G49930;AT3G60580;AT5G04340;AT5G43170;BRADI1G14750;BRADI1G16010;BRADI1G22940;BRADI2G49250;BRADI4G03340;Glyma04g04760.1;Glyma06g04840.1;Glyma14g09760.1;Glyma17g35430.1;Os03g0437200;Os12g0583700;POPTR_0001s30260;POPTR_0009s09250;POPTR_0014s01760;Sb01g031920;Sb02g038000;Sb02g038070
HORVU.MOREX.r3.5HG0424430.407	HvPUT1	TFmatrixID_0211	577	+	gACACTg	C2H2	AT1G27730;AT3G49930;AT3G60580;AT5G04340;AT5G43170;BRADI1G14750;BRADI1G16010;BRADI1G22940;BRADI2G49250;BRADI4G03340;Glyma04g04760.1;Glyma06g04840.1;Glyma14g09760.1;Glyma17g35430.1;Os03g0437200;Os12g0583700;POPTR_0001s30260;POPTR_0009s09250;POPTR_0014s01760;Sb01g031920;Sb02g038000;Sb02g038070
HORVU.MOREX.r3.5HG0424430.408	HvPUT1	TFmatrixID_0211	1157	+	tACACTt	C2H2	AT1G27730;AT3G49930;AT3G60580;AT5G04340;AT5G43170;BRADI1G14750;BRADI1G16010;BRADI1G22940;BRADI2G49250;BRADI4G03340;Glyma04g04760.1;Glyma06g04840.1;Glyma14g09760.1;Glyma17g35430.1;Os03g0437200;Os12g0583700;POPTR_0001s30260;POPTR_0009s09250;POPTR_0014s01760;Sb01g031920;Sb02g038000;Sb02g038070
HORVU.MOREX.r3.5HG0424430.409	HvPUT1	TFmatrixID_0213	437	-	gAGTGTa	C2H2	AT1G02030;AT2G45120;AT3G19580;AT3G49930;AT3G60580;AT5G04340;AT5G43170;BRADI1G14750;BRADI1G16010;BRADI2G49250;BRADI4G03340;BRADI4G03410;Glyma01g18750.1;Glyma01g32990.1;Glyma02g48090.1;Glyma03g03950.1;Glyma04g04760.1;Glyma06g04840.1;Glyma14g09760.1;Glyma17g35430.1;Os03g0437100;Os03g0437200;Os12g0583700;POPTR_0001s30260;POPTR_0002s14460;POPTR_0009s09250;POPTR_0014s01760;Sb01g031920;Sb02g038000;Sb02g…
HORVU.MOREX.r3.5HG0424430.410	HvPUT1	TFmatrixID_0213	577	+	gACACTg	C2H2	AT1G02030;AT2G45120;AT3G19580;AT3G49930;AT3G60580;AT5G04340;AT5G43170;BRADI1G14750;BRADI1G16010;BRADI2G49250;BRADI4G03340;BRADI4G03410;Glyma01g18750.1;Glyma01g32990.1;Glyma02g48090.1;Glyma03g03950.1;Glyma04g04760.1;Glyma06g04840.1;Glyma14g09760.1;Glyma17g35430.1;Os03g0437100;Os03g0437200;Os12g0583700;POPTR_0001s30260;POPTR_0002s14460;POPTR_0009s09250;POPTR_0014s01760;Sb01g031920;Sb02g038000;Sb02g…
HORVU.MOREX.r3.5HG0424430.411	HvPUT1	TFmatrixID_0213	1157	+	tACACTt	C2H2	AT1G02030;AT2G45120;AT3G19580;AT3G49930;AT3G60580;AT5G04340;AT5G43170;BRADI1G14750;BRADI1G16010;BRADI2G49250;BRADI4G03340;BRADI4G03410;Glyma01g18750.1;Glyma01g32990.1;Glyma02g48090.1;Glyma03g03950.1;Glyma04g04760.1;Glyma06g04840.1;Glyma14g09760.1;Glyma17g35430.1;Os03g0437100;Os03g0437200;Os12g0583700;POPTR_0001s30260;POPTR_0002s14460;POPTR_0009s09250;POPTR_0014s01760;Sb01g031920;Sb02g038000;Sb02g…
HORVU.MOREX.r3.5HG0424430.412	HvPUT1	TFmatrixID_0214	1154	+	cattACACTtata	C2H2	AT2G28710;AT2G37430;AT3G46070;AT3G46080;AT3G46090;BRADI1G03810;BRADI2G37430;BRADI2G54500;BRADI1G66330;Glyma02g10490.1;Glyma03g33050.1;Glyma03g33060.1;Glyma03g33070.1;Glyma10g05190.1;Glyma10g05210.1;Glyma10g43630.1;Glyma13g19550.1;Glyma13g19560.1;Glyma13g19570.1;Glyma13g40860.1;Glyma15g04570.1;Glyma18g52410.1;Glyma19g35740.1;Glyma19g35770.1;Glyma20g23180.1;Os01g0838600;Os01g0839100;Os03g0279700;Os…
HORVU.MOREX.r3.5HG0424430.413	HvPUT1	TFmatrixID_0222	1401	+	aATAAAac	CSD	AT2G21060;AT4G38680
HORVU.MOREX.r3.5HG0424430.414	HvPUT1	TFmatrixID_0223	854	+	ggaAATTTtaagg	TCR; CPP	AT4G14770;Glyma01g44670.1;POPTR_0010s09350
HORVU.MOREX.r3.5HG0424430.415	HvPUT1	TFmatrixID_0223	1243	-	tttttAAATTtta	TCR; CPP	AT4G14770;Glyma01g44670.1;POPTR_0010s09350
HORVU.MOREX.r3.5HG0424430.416	HvPUT1	TFmatrixID_0223	1246	+	ttaAATTTtaaat	TCR; CPP	AT4G14770;Glyma01g44670.1;POPTR_0010s09350
HORVU.MOREX.r3.5HG0424430.417	HvPUT1	TFmatrixID_0224	1244	+	tTTTAAat	TCR; CPP	AT2G20110;BRADI2G50540;Glyma07g09380.1;Glyma08g04180.1;Glyma09g32420.1;Os01g0761100;POPTR_0006s16340;POPTR_0018s08960
HORVU.MOREX.r3.5HG0424430.418	HvPUT1	TFmatrixID_0224	1244	-	ttTTAAAt	TCR; CPP	AT2G20110;BRADI2G50540;Glyma07g09380.1;Glyma08g04180.1;Glyma09g32420.1;Os01g0761100;POPTR_0006s16340;POPTR_0018s08960
HORVU.MOREX.r3.5HG0424430.419	HvPUT1	TFmatrixID_0224	1251	+	tTTTAAat	TCR; CPP	AT2G20110;BRADI2G50540;Glyma07g09380.1;Glyma08g04180.1;Glyma09g32420.1;Os01g0761100;POPTR_0006s16340;POPTR_0018s08960
HORVU.MOREX.r3.5HG0424430.420	HvPUT1	TFmatrixID_0224	1251	-	ttTTAAAt	TCR; CPP	AT2G20110;BRADI2G50540;Glyma07g09380.1;Glyma08g04180.1;Glyma09g32420.1;Os01g0761100;POPTR_0006s16340;POPTR_0018s08960
HORVU.MOREX.r3.5HG0424430.421	HvPUT1	TFmatrixID_0225	1243	+	tttTTAAAtt	TCR	AT3G04850
HORVU.MOREX.r3.5HG0424430.422	HvPUT1	TFmatrixID_0225	1243	-	ttTTTAAatt	TCR	AT3G04850
HORVU.MOREX.r3.5HG0424430.423	HvPUT1	TFmatrixID_0225	1250	+	attTTAAAtg	TCR	AT3G04850
HORVU.MOREX.r3.5HG0424430.424	HvPUT1	TFmatrixID_0225	1250	-	atTTTAAatg	TCR	AT3G04850
HORVU.MOREX.r3.5HG0424430.425	HvPUT1	TFmatrixID_0227	647	+	taTTTGAaaa	TCR; CPP;CPP	AT4G29000;BRADI2G50540;Glyma04g08670.1;Glyma06g08780.1;Glyma07g09380.1;Glyma08g04180.1;Glyma09g32420.1;Os01g0761100;POPTR_0006s16340;POPTR_0018s08960;GRMZM2G059678
HORVU.MOREX.r3.5HG0424430.426	HvPUT1	TFmatrixID_0233	227	+	agAAAAGtag	Dof	AT1G64620
HORVU.MOREX.r3.5HG0424430.427	HvPUT1	TFmatrixID_0233	745	+	ttAAAAGtag	Dof	AT1G64620
HORVU.MOREX.r3.5HG0424430.428	HvPUT1	TFmatrixID_0234	308	-	gCTTTTt	Dof	AT2G37590
HORVU.MOREX.r3.5HG0424430.429	HvPUT1	TFmatrixID_0234	1029	-	gCTTTTt	Dof	AT2G37590
HORVU.MOREX.r3.5HG0424430.430	HvPUT1	TFmatrixID_0235	227	+	agAAAAGt	Dof	AT3G21270
HORVU.MOREX.r3.5HG0424430.431	HvPUT1	TFmatrixID_0235	745	+	ttAAAAGt	Dof	AT3G21270
HORVU.MOREX.r3.5HG0424430.432	HvPUT1	TFmatrixID_0236	60	-	aCGTTAcc	Dof	AT3G45610
HORVU.MOREX.r3.5HG0424430.433	HvPUT1	TFmatrixID_0236	141	+	ccTAACGa	Dof	AT3G45610
HORVU.MOREX.r3.5HG0424430.434	HvPUT1	TFmatrixID_0237	228	+	gAAAAGtag	Dof	AT3G47500
HORVU.MOREX.r3.5HG0424430.435	HvPUT1	TFmatrixID_0238	744	+	cttAAAAGt	Dof	AT4G38000
HORVU.MOREX.r3.5HG0424430.436	HvPUT1	TFmatrixID_0239	306	-	ttgCTTTTtc	Dof	AT5G39660
HORVU.MOREX.r3.5HG0424430.437	HvPUT1	TFmatrixID_0239	1027	-	gtgCTTTTtc	Dof	AT5G39660
HORVU.MOREX.r3.5HG0424430.438	HvPUT1	TFmatrixID_0240	309	-	CTTTTtc	Dof	AT5G60200
HORVU.MOREX.r3.5HG0424430.439	HvPUT1	TFmatrixID_0240	1030	-	CTTTTtc	Dof	AT5G60200
HORVU.MOREX.r3.5HG0424430.440	HvPUT1	TFmatrixID_0241	59	-	caCGTTAcct	Dof	AT5G60850
HORVU.MOREX.r3.5HG0424430.441	HvPUT1	TFmatrixID_0242	58	-	acACGTTacct	Dof	AT5G60850
HORVU.MOREX.r3.5HG0424430.442	HvPUT1	TFmatrixID_0243	227	+	agAAAAGt	Dof	AT5G62940
HORVU.MOREX.r3.5HG0424430.443	HvPUT1	TFmatrixID_0243	745	+	ttAAAAGt	Dof	AT5G62940
HORVU.MOREX.r3.5HG0424430.444	HvPUT1	TFmatrixID_0254	690	-	tcATGTAccat	EIN3; EIL;EIL	AT1G73730;BRADI1G63780;BRADI3G39970;BRADI4G33750;Glyma02g44220.1;Glyma05g31410.1;Glyma08g14630.1;Glyma13g03660.1;Glyma13g03700.1;Glyma14g04550.1;Glyma15g03650.1;Glyma18g02190.1;Glyma20g12250.1;Os03g0324200;Os03g0324300;Os07g0685700;Os08g0508700;POPTR_0001s05360;POPTR_0001s05370;POPTR_0003s22090;POPTR_0004s20830;POPTR_0008s01200;POPTR_0009s16080;POPTR_0010s25370;Sb01g036740;Sb02g028390;Sb02g043350…
HORVU.MOREX.r3.5HG0424430.445	HvPUT1	TFmatrixID_0255	53	-	aagATACAc	EIN3; EIL;EIL	AT2G27050;AT5G21120;AT5G65100;BRADI1G63780;BRADI3G39970;BRADI4G33750;Glyma02g44220.1;Glyma04g14900.1;Glyma05g31410.1;Glyma08g14630.1;Glyma13g03660.1;Glyma13g03700.1;Glyma14g04550.1;Glyma15g03650.1;Glyma18g02190.1;Glyma20g12250.1;Os03g0324200;Os03g0324300;Os07g0685700;Os08g0508700;POPTR_0001s05360;POPTR_0001s05370;POPTR_0003s22090;POPTR_0004s20830;POPTR_0008s01200;POPTR_0009s16080;POPTR_0010s25370…
HORVU.MOREX.r3.5HG0424430.446	HvPUT1	TFmatrixID_0256	365	+	aaATGCAcca	EIN3; EIL;EIL	AT3G20770;AT5G21120;AT5G65100;BRADI1G63780;BRADI3G39970;BRADI4G33750;Glyma02g44220.1;Glyma04g14900.1;Glyma05g31410.1;Glyma08g14630.1;Glyma13g03660.1;Glyma13g03700.1;Glyma14g04550.1;Glyma15g03650.1;Glyma18g02190.1;Glyma20g12250.1;Os03g0324200;Os03g0324300;Os07g0685700;Os08g0508700;POPTR_0001s05360;POPTR_0001s05370;POPTR_0003s22090;POPTR_0004s20830;POPTR_0008s01200;POPTR_0009s16080;POPTR_0010s25370…
HORVU.MOREX.r3.5HG0424430.447	HvPUT1	TFmatrixID_0257	690	-	tcATGTAccat	EIN3;EIL	BRADI1G63780;BRADI3G39970;BRADI4G33750;Glyma02g44220.1;Glyma05g31410.1;Glyma13g03660.1;Glyma13g03700.1;Glyma14g04550.1;Glyma15g03650.1;Glyma20g12250.1;Os03g0324200;Os03g0324300;Os07g0685700;Os08g0508700;Os09g0490200;POPTR_0001s05360;POPTR_0001s05370;POPTR_0003s22090;POPTR_0004s20830;POPTR_0008s01200;POPTR_0009s16080;POPTR_0010s25370;Sb01g036740;Sb02g028390;Sb02g043350;Sb07g027790;AC234203.1_FG011…
HORVU.MOREX.r3.5HG0424430.448	HvPUT1	TFmatrixID_0262	43	-	gcGATCAag	GATA	AT3G06740;AT3G16870;AT4G16141;AT4G26150;AT5G26930;AT5G49300;AT5G56860;BRADI1G03020;BRADI1G37480;BRADI2G14890;BRADI2G62660;BRADI3G08240;Glyma03g39220.1;Glyma04g05430.1;Glyma09g07090.1;Glyma13g00200.1;Glyma14g10830.1;Glyma15g18380.1;Glyma17g03410.1;Glyma17g06290.1;Glyma17g34670.1;Glyma19g41780.1;Os01g0976800;Os02g0220400;Os03g0831200;Os05g0155400;Os05g0578900;Os06g0571800;POPTR_0005s02040;POPTR_000…
HORVU.MOREX.r3.5HG0424430.449	HvPUT1	TFmatrixID_0262	424	-	caGATCAcg	GATA	AT3G06740;AT3G16870;AT4G16141;AT4G26150;AT5G26930;AT5G49300;AT5G56860;BRADI1G03020;BRADI1G37480;BRADI2G14890;BRADI2G62660;BRADI3G08240;Glyma03g39220.1;Glyma04g05430.1;Glyma09g07090.1;Glyma13g00200.1;Glyma14g10830.1;Glyma15g18380.1;Glyma17g03410.1;Glyma17g06290.1;Glyma17g34670.1;Glyma19g41780.1;Os01g0976800;Os02g0220400;Os03g0831200;Os05g0155400;Os05g0578900;Os06g0571800;POPTR_0005s02040;POPTR_000…
HORVU.MOREX.r3.5HG0424430.450	HvPUT1	TFmatrixID_0264	273	+	ctAGATCgtg	GATA; tify	AT2G45050;AT3G24050;AT5G25830;AT5G66320;BRADI1G75420;BRADI1G78540;BRADI2G19480;BRADI2G49620;BRADI3G33200;BRADI3G50160;BRADI3G54720;BRADI5G17057;Glyma01g37450.1;Glyma02g05710.1;Glyma02g07850.1;Glyma02g08150.1;Glyma03g27250.1;Glyma04g01090.1;Glyma04g08990.1;Glyma06g01110.1;Glyma06g09080.1;Glyma07g01960.1;Glyma07g14750.1;Glyma10g25480.1;Glyma10g35470.1;Glyma11g11930.1;Glyma11g20480.1;Glyma12g04180.1…
HORVU.MOREX.r3.5HG0424430.451	HvPUT1	TFmatrixID_0266	273	-	ctAGATCgt	GATA; tify	AT2G28340;AT2G45050;AT3G54810;AT5G25830;AT5G66320;BRADI1G75420;BRADI1G78540;BRADI2G19480;BRADI2G49620;BRADI3G33200;BRADI3G50160;BRADI3G54720;BRADI5G17057;Glyma01g37450.1;Glyma02g05710.1;Glyma02g07850.1;Glyma02g08150.1;Glyma03g27250.1;Glyma04g01090.1;Glyma04g08990.1;Glyma06g01110.1;Glyma06g09080.1;Glyma07g01960.1;Glyma07g14750.1;Glyma10g25480.1;Glyma10g35470.1;Glyma11g11930.1;Glyma11g20480.1;Glyma…
HORVU.MOREX.r3.5HG0424430.452	HvPUT1	TFmatrixID_0266	423	-	ccAGATCac	GATA; tify	AT2G28340;AT2G45050;AT3G54810;AT5G25830;AT5G66320;BRADI1G75420;BRADI1G78540;BRADI2G19480;BRADI2G49620;BRADI3G33200;BRADI3G50160;BRADI3G54720;BRADI5G17057;Glyma01g37450.1;Glyma02g05710.1;Glyma02g07850.1;Glyma02g08150.1;Glyma03g27250.1;Glyma04g01090.1;Glyma04g08990.1;Glyma06g01110.1;Glyma06g09080.1;Glyma07g01960.1;Glyma07g14750.1;Glyma10g25480.1;Glyma10g35470.1;Glyma11g11930.1;Glyma11g20480.1;Glyma…
HORVU.MOREX.r3.5HG0424430.453	HvPUT1	TFmatrixID_0267	273	+	ctAGATCgtg	GATA; tify	AT2G28340;AT2G45050;AT3G60530;AT5G25830;AT5G66320;BRADI1G75420;BRADI1G78540;BRADI2G19480;BRADI2G49620;BRADI3G33200;BRADI3G50160;BRADI3G54720;BRADI5G17057;Glyma01g37450.1;Glyma02g05710.1;Glyma02g07850.1;Glyma02g08150.1;Glyma03g27250.1;Glyma04g01090.1;Glyma04g08990.1;Glyma06g01110.1;Glyma06g09080.1;Glyma07g01960.1;Glyma07g14750.1;Glyma10g25480.1;Glyma10g35470.1;Glyma11g11930.1;Glyma11g20480.1;Glyma…
HORVU.MOREX.r3.5HG0424430.454	HvPUT1	TFmatrixID_0268	43	+	gCGATCaagc	GATA	AT4G17570;BRADI5G17370;Glyma01g41370.1;Glyma05g05320.1;Glyma11g04060.1;Glyma17g15610.1;Os04g0544500;POPTR_0001s15170;POPTR_0003s08080;Sb01g011980;Sb06g024200;GRMZM2G077002;GRMZM2G421212
HORVU.MOREX.r3.5HG0424430.455	HvPUT1	TFmatrixID_0268	272	-	cctaGATCGt	GATA	AT4G17570;BRADI5G17370;Glyma01g41370.1;Glyma05g05320.1;Glyma11g04060.1;Glyma17g15610.1;Os04g0544500;POPTR_0001s15170;POPTR_0003s08080;Sb01g011980;Sb06g024200;GRMZM2G077002;GRMZM2G421212
HORVU.MOREX.r3.5HG0424430.456	HvPUT1	TFmatrixID_0268	325	-	gagcGATCGg	GATA	AT4G17570;BRADI5G17370;Glyma01g41370.1;Glyma05g05320.1;Glyma11g04060.1;Glyma17g15610.1;Os04g0544500;POPTR_0001s15170;POPTR_0003s08080;Sb01g011980;Sb06g024200;GRMZM2G077002;GRMZM2G421212
HORVU.MOREX.r3.5HG0424430.457	HvPUT1	TFmatrixID_0268	327	+	gCGATCggcc	GATA	AT4G17570;BRADI5G17370;Glyma01g41370.1;Glyma05g05320.1;Glyma11g04060.1;Glyma17g15610.1;Os04g0544500;POPTR_0001s15170;POPTR_0003s08080;Sb01g011980;Sb06g024200;GRMZM2G077002;GRMZM2G421212
HORVU.MOREX.r3.5HG0424430.458	HvPUT1	TFmatrixID_0270	274	+	tAGATCgtga	GATA; tify	AT2G28340;AT2G45050;AT4G34680;AT5G25830;AT5G66320;BRADI1G75420;BRADI1G78540;BRADI2G19480;BRADI2G49620;BRADI3G33200;BRADI3G50160;BRADI3G54720;BRADI5G17057;Glyma01g37450.1;Glyma02g05710.1;Glyma02g07850.1;Glyma02g08150.1;Glyma03g27250.1;Glyma04g01090.1;Glyma04g08990.1;Glyma06g01110.1;Glyma06g09080.1;Glyma07g01960.1;Glyma07g14750.1;Glyma10g25480.1;Glyma10g35470.1;Glyma11g11930.1;Glyma11g20480.1;Glyma…
HORVU.MOREX.r3.5HG0424430.459	HvPUT1	TFmatrixID_0270	424	+	cAGATCacga	GATA; tify	AT2G28340;AT2G45050;AT4G34680;AT5G25830;AT5G66320;BRADI1G75420;BRADI1G78540;BRADI2G19480;BRADI2G49620;BRADI3G33200;BRADI3G50160;BRADI3G54720;BRADI5G17057;Glyma01g37450.1;Glyma02g05710.1;Glyma02g07850.1;Glyma02g08150.1;Glyma03g27250.1;Glyma04g01090.1;Glyma04g08990.1;Glyma06g01110.1;Glyma06g09080.1;Glyma07g01960.1;Glyma07g14750.1;Glyma10g25480.1;Glyma10g35470.1;Glyma11g11930.1;Glyma11g20480.1;Glyma…
HORVU.MOREX.r3.5HG0424430.460	HvPUT1	TFmatrixID_0272	43	+	gCGATCaag	GATA	AT5G47140;BRADI5G17370;Glyma01g41370.1;Glyma05g05320.1;Glyma11g04060.1;Glyma17g15610.1;Os04g0544500;POPTR_0001s15170;POPTR_0003s08080;Sb01g011980;Sb06g024200;GRMZM2G077002;GRMZM2G421212
HORVU.MOREX.r3.5HG0424430.461	HvPUT1	TFmatrixID_0272	326	-	agcGATCGg	GATA	AT5G47140;BRADI5G17370;Glyma01g41370.1;Glyma05g05320.1;Glyma11g04060.1;Glyma17g15610.1;Os04g0544500;POPTR_0001s15170;POPTR_0003s08080;Sb01g011980;Sb06g024200;GRMZM2G077002;GRMZM2G421212
HORVU.MOREX.r3.5HG0424430.462	HvPUT1	TFmatrixID_0277	1429	+	tGTACGggc	GRAS	AT3G03450;AT5G17490;Glyma11g33720.1;Glyma18g04500.1;POPTR_0004s08890;POPTR_0005s14540
HORVU.MOREX.r3.5HG0424430.463	HvPUT1	TFmatrixID_0282	1004	-	acaTAATAtattt	Homeodomain; HD-ZIP	AT2G36610;Glyma10g07440.1;Glyma13g21330.1
HORVU.MOREX.r3.5HG0424430.464	HvPUT1	TFmatrixID_0282	1216	+	tgataTATTAtga	Homeodomain; HD-ZIP	AT2G36610;Glyma10g07440.1;Glyma13g21330.1
HORVU.MOREX.r3.5HG0424430.465	HvPUT1	TFmatrixID_0283	1104	+	ttaTGATTat	Homeodomain; HD-ZIP;HD-ZIP	AT2G22800;AT2G44910;AT4G16780;AT4G37790;AT5G06710;AT5G47370;BRADI1G51257;BRADI1G51270;BRADI1G69150;BRADI2G45000;BRADI3G21480;BRADI3G37810;BRADI3G46320;BRADI4G31690;BRADI5G17570;Glyma0041s00350.1;Glyma01g40450.1;Glyma02g28860.1;Glyma03g26700.1;Glyma03g30200.1;Glyma04g05200.1;Glyma05g04990.1;Glyma05g23150.1;Glyma07g14270.1;Glyma07g34230.1;Glyma08g15780.1;Glyma09g16790.1;Glyma09g37680.1;Glyma11g0385…
HORVU.MOREX.r3.5HG0424430.466	HvPUT1	TFmatrixID_0283	1223	+	ttaTGATTaa	Homeodomain; HD-ZIP;HD-ZIP	AT2G22800;AT2G44910;AT4G16780;AT4G37790;AT5G06710;AT5G47370;BRADI1G51257;BRADI1G51270;BRADI1G69150;BRADI2G45000;BRADI3G21480;BRADI3G37810;BRADI3G46320;BRADI4G31690;BRADI5G17570;Glyma0041s00350.1;Glyma01g40450.1;Glyma02g28860.1;Glyma03g26700.1;Glyma03g30200.1;Glyma04g05200.1;Glyma05g04990.1;Glyma05g23150.1;Glyma07g14270.1;Glyma07g34230.1;Glyma08g15780.1;Glyma09g16790.1;Glyma09g37680.1;Glyma11g0385…
HORVU.MOREX.r3.5HG0424430.467	HvPUT1	TFmatrixID_0283	1255	+	aaaTGATTat	Homeodomain; HD-ZIP;HD-ZIP	AT2G22800;AT2G44910;AT4G16780;AT4G37790;AT5G06710;AT5G47370;BRADI1G51257;BRADI1G51270;BRADI1G69150;BRADI2G45000;BRADI3G21480;BRADI3G37810;BRADI3G46320;BRADI4G31690;BRADI5G17570;Glyma0041s00350.1;Glyma01g40450.1;Glyma02g28860.1;Glyma03g26700.1;Glyma03g30200.1;Glyma04g05200.1;Glyma05g04990.1;Glyma05g23150.1;Glyma07g14270.1;Glyma07g34230.1;Glyma08g15780.1;Glyma09g16790.1;Glyma09g37680.1;Glyma11g0385…
HORVU.MOREX.r3.5HG0424430.468	HvPUT1	TFmatrixID_0283	1322	-	ttAATCAtat	Homeodomain; HD-ZIP;HD-ZIP	AT2G22800;AT2G44910;AT4G16780;AT4G37790;AT5G06710;AT5G47370;BRADI1G51257;BRADI1G51270;BRADI1G69150;BRADI2G45000;BRADI3G21480;BRADI3G37810;BRADI3G46320;BRADI4G31690;BRADI5G17570;Glyma0041s00350.1;Glyma01g40450.1;Glyma02g28860.1;Glyma03g26700.1;Glyma03g30200.1;Glyma04g05200.1;Glyma05g04990.1;Glyma05g23150.1;Glyma07g14270.1;Glyma07g34230.1;Glyma08g15780.1;Glyma09g16790.1;Glyma09g37680.1;Glyma11g0385…
HORVU.MOREX.r3.5HG0424430.469	HvPUT1	TFmatrixID_0284	1223	+	ttaTGATTaa	Homeodomain; HD-ZIP;HD-ZIP	AT2G46680;BRADI4G35910;Glyma04g40960.1;Glyma06g13890.1;Glyma16g02390.1;Glyma19g44800.1;POPTR_0001s11380;POPTR_0002s17680;POPTR_0012s03080;POPTR_0014s09860;Sb02g030660;GRMZM2G034113;GRMZM2G041462
HORVU.MOREX.r3.5HG0424430.470	HvPUT1	TFmatrixID_0284	1255	+	aaaTGATTat	Homeodomain; HD-ZIP;HD-ZIP	AT2G46680;BRADI4G35910;Glyma04g40960.1;Glyma06g13890.1;Glyma16g02390.1;Glyma19g44800.1;POPTR_0001s11380;POPTR_0002s17680;POPTR_0012s03080;POPTR_0014s09860;Sb02g030660;GRMZM2G034113;GRMZM2G041462
HORVU.MOREX.r3.5HG0424430.471	HvPUT1	TFmatrixID_0284	1322	-	ttAATCAtat	Homeodomain; HD-ZIP;HD-ZIP	AT2G46680;BRADI4G35910;Glyma04g40960.1;Glyma06g13890.1;Glyma16g02390.1;Glyma19g44800.1;POPTR_0001s11380;POPTR_0002s17680;POPTR_0012s03080;POPTR_0014s09860;Sb02g030660;GRMZM2G034113;GRMZM2G041462
HORVU.MOREX.r3.5HG0424430.472	HvPUT1	TFmatrixID_0287	1319	+	gtaTTAATca	Homeodomain; bZIP; HD-ZIP;HD-ZIP	AT3G61890;BRADI4G35910;Glyma04g40960.1;Glyma06g13890.1;Glyma16g02390.1;Glyma19g44800.1;POPTR_0002s17680;POPTR_0012s03080;POPTR_0014s09860;Sb02g030660;GRMZM2G034113;GRMZM2G041462
HORVU.MOREX.r3.5HG0424430.473	HvPUT1	TFmatrixID_0287	1319	-	gtATTAAtca	Homeodomain; bZIP; HD-ZIP;HD-ZIP	AT3G61890;BRADI4G35910;Glyma04g40960.1;Glyma06g13890.1;Glyma16g02390.1;Glyma19g44800.1;POPTR_0002s17680;POPTR_0012s03080;POPTR_0014s09860;Sb02g030660;GRMZM2G034113;GRMZM2G041462
HORVU.MOREX.r3.5HG0424430.474	HvPUT1	TFmatrixID_0289	612	+	ccaTGATTtg	Homeodomain; HD-ZIP;HD-ZIP	AT2G22800;AT4G16780;AT4G17460;AT4G37790;AT5G06710;AT5G47370;BRADI1G51257;BRADI1G51270;BRADI1G69150;BRADI2G45000;BRADI3G21480;BRADI3G37810;BRADI3G46320;BRADI4G31690;BRADI5G17570;Glyma0041s00350.1;Glyma01g40450.1;Glyma02g28860.1;Glyma03g26700.1;Glyma03g30200.1;Glyma04g05200.1;Glyma05g04990.1;Glyma05g23150.1;Glyma07g14270.1;Glyma08g15780.1;Glyma09g16790.1;Glyma09g37680.1;Glyma11g03850.1;Glyma11g0484…
HORVU.MOREX.r3.5HG0424430.475	HvPUT1	TFmatrixID_0289	1104	+	ttaTGATTat	Homeodomain; HD-ZIP;HD-ZIP	AT2G22800;AT4G16780;AT4G17460;AT4G37790;AT5G06710;AT5G47370;BRADI1G51257;BRADI1G51270;BRADI1G69150;BRADI2G45000;BRADI3G21480;BRADI3G37810;BRADI3G46320;BRADI4G31690;BRADI5G17570;Glyma0041s00350.1;Glyma01g40450.1;Glyma02g28860.1;Glyma03g26700.1;Glyma03g30200.1;Glyma04g05200.1;Glyma05g04990.1;Glyma05g23150.1;Glyma07g14270.1;Glyma08g15780.1;Glyma09g16790.1;Glyma09g37680.1;Glyma11g03850.1;Glyma11g0484…
HORVU.MOREX.r3.5HG0424430.476	HvPUT1	TFmatrixID_0289	1223	+	ttaTGATTaa	Homeodomain; HD-ZIP;HD-ZIP	AT2G22800;AT4G16780;AT4G17460;AT4G37790;AT5G06710;AT5G47370;BRADI1G51257;BRADI1G51270;BRADI1G69150;BRADI2G45000;BRADI3G21480;BRADI3G37810;BRADI3G46320;BRADI4G31690;BRADI5G17570;Glyma0041s00350.1;Glyma01g40450.1;Glyma02g28860.1;Glyma03g26700.1;Glyma03g30200.1;Glyma04g05200.1;Glyma05g04990.1;Glyma05g23150.1;Glyma07g14270.1;Glyma08g15780.1;Glyma09g16790.1;Glyma09g37680.1;Glyma11g03850.1;Glyma11g0484…
HORVU.MOREX.r3.5HG0424430.477	HvPUT1	TFmatrixID_0289	1255	+	aaaTGATTat	Homeodomain; HD-ZIP;HD-ZIP	AT2G22800;AT4G16780;AT4G17460;AT4G37790;AT5G06710;AT5G47370;BRADI1G51257;BRADI1G51270;BRADI1G69150;BRADI2G45000;BRADI3G21480;BRADI3G37810;BRADI3G46320;BRADI4G31690;BRADI5G17570;Glyma0041s00350.1;Glyma01g40450.1;Glyma02g28860.1;Glyma03g26700.1;Glyma03g30200.1;Glyma04g05200.1;Glyma05g04990.1;Glyma05g23150.1;Glyma07g14270.1;Glyma08g15780.1;Glyma09g16790.1;Glyma09g37680.1;Glyma11g03850.1;Glyma11g0484…
HORVU.MOREX.r3.5HG0424430.478	HvPUT1	TFmatrixID_0289	1322	-	ttAATCAtat	Homeodomain; HD-ZIP;HD-ZIP	AT2G22800;AT4G16780;AT4G17460;AT4G37790;AT5G06710;AT5G47370;BRADI1G51257;BRADI1G51270;BRADI1G69150;BRADI2G45000;BRADI3G21480;BRADI3G37810;BRADI3G46320;BRADI4G31690;BRADI5G17570;Glyma0041s00350.1;Glyma01g40450.1;Glyma02g28860.1;Glyma03g26700.1;Glyma03g30200.1;Glyma04g05200.1;Glyma05g04990.1;Glyma05g23150.1;Glyma07g14270.1;Glyma08g15780.1;Glyma09g16790.1;Glyma09g37680.1;Glyma11g03850.1;Glyma11g0484…
HORVU.MOREX.r3.5HG0424430.479	HvPUT1	TFmatrixID_0296	510	-	agcGATTAgg	Homeodomain; ZF-HD;ZF-HD	Os02g0706600;Sb04g030480;GRMZM2G069365
HORVU.MOREX.r3.5HG0424430.480	HvPUT1	TFmatrixID_0296	1105	-	tatGATTAtc	Homeodomain; ZF-HD;ZF-HD	Os02g0706600;Sb04g030480;GRMZM2G069365
HORVU.MOREX.r3.5HG0424430.481	HvPUT1	TFmatrixID_0296	1224	-	tatGATTAat	Homeodomain; ZF-HD;ZF-HD	Os02g0706600;Sb04g030480;GRMZM2G069365
HORVU.MOREX.r3.5HG0424430.482	HvPUT1	TFmatrixID_0296	1321	+	atTAATCata	Homeodomain; ZF-HD;ZF-HD	Os02g0706600;Sb04g030480;GRMZM2G069365
HORVU.MOREX.r3.5HG0424430.483	HvPUT1	TFmatrixID_0296	1469	+	ctTAATCtgg	Homeodomain; ZF-HD;ZF-HD	Os02g0706600;Sb04g030480;GRMZM2G069365
HORVU.MOREX.r3.5HG0424430.484	HvPUT1	TFmatrixID_0298	1254	+	taaaTGATTa	Homeodomain; HD-ZIP;HD-ZIP	AT1G69780;AT2G18550;AT3G01220;AT5G15150;BRADI1G71930;BRADI1G73190;BRADI3G35850;BRADI3G38600;BRADI3G56180;BRADI4G32737;Glyma01g04890.1;Glyma01g05230.1;Glyma01g38390.1;Glyma02g02290.1;Glyma02g02630.1;Glyma02g06560.1;Glyma04g40960.1;Glyma05g01390.1;Glyma05g30940.1;Glyma06g13890.1;Glyma06g20230.1;Glyma08g14130.1;Glyma08g40710.1;Glyma08g40970.1;Glyma09g37410.1;Glyma11g06940.1;Glyma11g37920.1;Glyma13g0…
HORVU.MOREX.r3.5HG0424430.485	HvPUT1	TFmatrixID_0302	1360	+	acaaTAGTCc	Homeodomain	Glyma09g06730.1;Glyma17g06690.1;POPTR_0018s13920
HORVU.MOREX.r3.5HG0424430.486	HvPUT1	TFmatrixID_0305	1194	+	cGGTTAac	MADF; Trihelix	AT1G13450;Glyma18g01360.1;POPTR_0008s17980;POPTR_0010s06510
HORVU.MOREX.r3.5HG0424430.487	HvPUT1	TFmatrixID_0305	1196	-	gtTAACCg	MADF; Trihelix	AT1G13450;Glyma18g01360.1;POPTR_0008s17980;POPTR_0010s06510
HORVU.MOREX.r3.5HG0424430.488	HvPUT1	TFmatrixID_0306	1191	-	tttcGGTTAa	MADF; Trihelix	AT3G25990;Glyma18g01360.1
HORVU.MOREX.r3.5HG0424430.489	HvPUT1	TFmatrixID_0306	1197	+	tTAACCgaac	MADF; Trihelix	AT3G25990;Glyma18g01360.1
HORVU.MOREX.r3.5HG0424430.490	HvPUT1	TFmatrixID_0310	523	+	agtTTTACtg	MADF;Trihelix	Os02g0104500;Os04g0541100;Os10g0516500;POPTR_0006s23800;POPTR_0018s05520;POPTR_0018s05540;Sb04g000520;GRMZM2G111760
HORVU.MOREX.r3.5HG0424430.491	HvPUT1	TFmatrixID_0312	1191	+	tttcGGTTAa	MADF;Trihelix	BRADI5G13900;Os04g0486400;Sb06g020670;GRMZM2G047370
HORVU.MOREX.r3.5HG0424430.492	HvPUT1	TFmatrixID_0312	1197	-	tTAACCgaac	MADF;Trihelix	BRADI5G13900;Os04g0486400;Sb06g020670;GRMZM2G047370
HORVU.MOREX.r3.5HG0424430.493	HvPUT1	TFmatrixID_0313	1195	+	gGTTAAcc	MADF	Glyma18g01360.1;POPTR_0008s17980;POPTR_0010s06510
HORVU.MOREX.r3.5HG0424430.494	HvPUT1	TFmatrixID_0313	1195	-	ggTTAACc	MADF	Glyma18g01360.1;POPTR_0008s17980;POPTR_0010s06510
HORVU.MOREX.r3.5HG0424430.495	HvPUT1	TFmatrixID_0314	1194	+	cgGTTAAccg	MADF	Glyma18g01360.1;POPTR_0008s17980;POPTR_0010s06510
HORVU.MOREX.r3.5HG0424430.496	HvPUT1	TFmatrixID_0314	1194	-	cggTTAACcg	MADF	Glyma18g01360.1;POPTR_0008s17980;POPTR_0010s06510
HORVU.MOREX.r3.5HG0424430.497	HvPUT1	TFmatrixID_0315	1197	+	tTAACCgaac	MADF	Glyma18g01360.1;POPTR_0008s17980;POPTR_0010s06510
HORVU.MOREX.r3.5HG0424430.498	HvPUT1	TFmatrixID_0316	1191	+	tttcGGTTAa	MADF;Trihelix	BRADI5G13900;Glyma11g37390.1;Glyma18g01360.1;POPTR_0008s17980;POPTR_0010s06510;Sb06g020670;GRMZM2G047370
HORVU.MOREX.r3.5HG0424430.499	HvPUT1	TFmatrixID_0316	1197	-	tTAACCgaac	MADF;Trihelix	BRADI5G13900;Glyma11g37390.1;Glyma18g01360.1;POPTR_0008s17980;POPTR_0010s06510;Sb06g020670;GRMZM2G047370
HORVU.MOREX.r3.5HG0424430.500	HvPUT1	TFmatrixID_0317	807	-	tTAACCgatt	MADF;Trihelix	BRADI5G13900;Glyma18g01360.1;POPTR_0008s17980;POPTR_0010s06510;GRMZM2G047370
HORVU.MOREX.r3.5HG0424430.501	HvPUT1	TFmatrixID_0317	1191	+	tttcGGTTAa	MADF;Trihelix	BRADI5G13900;Glyma18g01360.1;POPTR_0008s17980;POPTR_0010s06510;GRMZM2G047370
HORVU.MOREX.r3.5HG0424430.502	HvPUT1	TFmatrixID_0317	1197	-	tTAACCgaac	MADF;Trihelix	BRADI5G13900;Glyma18g01360.1;POPTR_0008s17980;POPTR_0010s06510;GRMZM2G047370
HORVU.MOREX.r3.5HG0424430.503	HvPUT1	TFmatrixID_0318	807	-	tTAACCgatt	MADF	Glyma18g01360.1;MDP0000164819;POPTR_0008s17980;POPTR_0010s06510
HORVU.MOREX.r3.5HG0424430.504	HvPUT1	TFmatrixID_0318	1191	+	tttcGGTTAa	MADF	Glyma18g01360.1;MDP0000164819;POPTR_0008s17980;POPTR_0010s06510
HORVU.MOREX.r3.5HG0424430.505	HvPUT1	TFmatrixID_0318	1197	-	tTAACCgaac	MADF	Glyma18g01360.1;MDP0000164819;POPTR_0008s17980;POPTR_0010s06510
HORVU.MOREX.r3.5HG0424430.506	HvPUT1	TFmatrixID_0319	189	+	tctGGATAag	Myb/SANT;MYB-related	AT3G16350;BRADI2G05590;BRADI3G33400;Glyma01g00600.1;Glyma05g04950.1;Glyma13g43120.1;Glyma15g02250.1;Glyma17g15330.1;Glyma18g31990.1;Os01g0187900;Os10g0561400;POPTR_0001s15510;POPTR_0001s19070;POPTR_0003s07720;Sb01g029020;Sb03g003270;Sb07g003170;GRMZM2G034110;GRMZM2G400489
HORVU.MOREX.r3.5HG0424430.507	HvPUT1	TFmatrixID_0320	1082	+	atGATATta	Myb/SANT; MYB-related;MYB-related	AT1G01520;AT3G09600;AT4G01280;AT5G02840;AT5G52660;BRADI1G32330;BRADI3G51757;Glyma03g33440.1;Glyma07g07200.1;Glyma09g24400.1;Glyma10g05560.1;Glyma10g37520.1;Glyma13g19910.1;Glyma16g03640.1;Glyma16g29740.1;Glyma18g47230.1;Glyma19g36170.1;Glyma20g30250.1;Os02g0680700;Os06g0105800;Os06g0669700;POPTR_0002s16460;POPTR_0004s07160;POPTR_0006s13530;POPTR_0014s08520;POPTR_0016s08470;POPTR_0017s01140;Sb04g0…
HORVU.MOREX.r3.5HG0424430.508	HvPUT1	TFmatrixID_0321	1345	-	aGCCCTac	Myb/SANT	Glyma01g40220.1;Glyma05g22500.1;Glyma11g05070.1;Glyma17g17370.1;POPTR_0001s30000;POPTR_0009s09020
HORVU.MOREX.r3.5HG0424430.509	HvPUT1	TFmatrixID_0323	1082	-	atGATATtaa	Myb/SANT;MYB-related	Glyma09g29800.1;Glyma16g34340.1;Os06g0728700;POPTR_0004s07270;POPTR_0012s03530;POPTR_0015s05430;Sb10g030960;GRMZM2G145041
HORVU.MOREX.r3.5HG0424430.510	HvPUT1	TFmatrixID_0326	190	-	ctGGATAaga	Myb/SANT;MYB-related	AT1G70000;BRADI3G33400;Glyma01g04530.1;Glyma02g03020.1;Glyma04g34720.1;Glyma05g01640.1;Glyma06g19960.1;Glyma08g40460.1;Glyma17g10250.1;Glyma18g17130.1;Os01g0187900;Os10g0561400;POPTR_0008s19610;POPTR_0010s04860;POPTR_0012s07560;POPTR_0015s08020;Sb01g029020;Sb03g003270;Sb03g006450;GRMZM2G034110;GRMZM2G400489
HORVU.MOREX.r3.5HG0424430.511	HvPUT1	TFmatrixID_0328	191	+	tGGATAag	Myb/SANT;MYB-related	AT1G70000;AT3G16350;BRADI3G33400;Glyma01g04530.1;Glyma02g03020.1;Glyma04g34720.1;Glyma05g01640.1;Glyma05g04950.1;Glyma06g19960.1;Glyma08g40460.1;Glyma13g43120.1;Glyma15g02250.1;Glyma17g10250.1;Glyma18g17130.1;Os01g0187900;Os10g0561400;POPTR_0001s19070;POPTR_0003s07720;POPTR_0008s19610;POPTR_0010s04860;POPTR_0015s08020;Sb01g029020;Sb03g003270;GRMZM2G034110;GRMZM2G400489
HORVU.MOREX.r3.5HG0424430.512	HvPUT1	TFmatrixID_0331	190	-	ctGGATAaga	Myb/SANT;MYB-related	AT3G16350;BRADI2G05590;BRADI3G33400;Glyma01g00600.1;Glyma05g04950.1;Glyma13g43120.1;Glyma15g02250.1;Glyma17g15330.1;Glyma18g31990.1;Os01g0187900;Os10g0561400;POPTR_0001s15510;POPTR_0001s19070;POPTR_0001s22660;POPTR_0003s07720;Sb01g029020;Sb03g003270;GRMZM2G034110;GRMZM2G400489
HORVU.MOREX.r3.5HG0424430.513	HvPUT1	TFmatrixID_0333	1345	-	agCCCTAc	Myb/SANT	AT1G15720
HORVU.MOREX.r3.5HG0424430.514	HvPUT1	TFmatrixID_0334	1083	-	tGATATtaa	Myb/SANT; MYB-related;MYB-related	AT1G18330;AT3G10113;BRADI1G29680;Glyma09g29800.1;Os06g0728700;Sb10g030960;GRMZM2G145041
HORVU.MOREX.r3.5HG0424430.515	HvPUT1	TFmatrixID_0335	189	+	tctGGATAag	Myb/SANT;MYB-related	AT1G19000;BRADI3G33400;Os10g0561400;POPTR_0008s19610;POPTR_0010s04860;Sb01g029020;GRMZM2G034110
HORVU.MOREX.r3.5HG0424430.516	HvPUT1	TFmatrixID_0339	935	+	gtgGGATAccc	Myb/SANT	AT1G74840;Glyma01g04530.1;Glyma02g03020.1;Glyma05g01640.1;Glyma08g40460.1;Glyma17g10250.1;Glyma18g17130.1;POPTR_0008s19610;POPTR_0010s04860
HORVU.MOREX.r3.5HG0424430.517	HvPUT1	TFmatrixID_0348	52	-	cAAGATacac	Myb/SANT; ARR-B;ARR-B	AT4G16110;BRADI1G69480;Glyma02g09450.1;Glyma07g26890.1;Glyma07g37220.1;Glyma09g04470.1;Glyma09g14650.1;Glyma15g15520.1;Glyma15g24770.1;Glyma17g03380.1;Os03g0224200;POPTR_0008s13490;POPTR_0008s22990;POPTR_0010s00320;POPTR_0010s11600;Sb01g042400;GRMZM2G099797;GRMZM2G126834
HORVU.MOREX.r3.5HG0424430.518	HvPUT1	TFmatrixID_0349	483	+	ctgaAATCTc	Myb/SANT; ARR-B	AT4G18020;Glyma11g04440.1;Glyma17g16360.1;POPTR_0001s02910;POPTR_0003s08600
HORVU.MOREX.r3.5HG0424430.519	HvPUT1	TFmatrixID_0350	58	+	acaCGTTAcct	Myb/SANT; MYB	AT4G18770
HORVU.MOREX.r3.5HG0424430.520	HvPUT1	TFmatrixID_0353	191	-	tgGATAAgag	Myb/SANT	AT5G04760
HORVU.MOREX.r3.5HG0424430.521	HvPUT1	TFmatrixID_0356	191	-	tgGATAAga	Myb/SANT	AT5G08520
HORVU.MOREX.r3.5HG0424430.522	HvPUT1	TFmatrixID_0357	653	+	aaAATATttg	Myb/SANT; G2-like; MYB;G2-like	AT1G32240;AT4G17695;AT5G16560;AT5G42630;BRADI1G07510;BRADI3G00550;BRADI3G16340;BRADI3G36260;BRADI3G52320;BRADI4G29700;Glyma02g40930.1;Glyma04g03800.1;Glyma06g03900.1;Glyma07g12070.1;Glyma09g30140.1;Glyma09g34030.1;Glyma11g33350.1;Glyma14g08620.1;Glyma14g39260.1;Glyma17g36500.1;Glyma18g04880.1;Os02g0696900;Os03g0766500;Os08g0160300;Os08g0426866;Os09g0395300;POPTR_0001s02010;POPTR_0002s13170;POPTR_…
HORVU.MOREX.r3.5HG0424430.523	HvPUT1	TFmatrixID_0357	653	-	aaaATATTtg	Myb/SANT; G2-like; MYB;G2-like	AT1G32240;AT4G17695;AT5G16560;AT5G42630;BRADI1G07510;BRADI3G00550;BRADI3G16340;BRADI3G36260;BRADI3G52320;BRADI4G29700;Glyma02g40930.1;Glyma04g03800.1;Glyma06g03900.1;Glyma07g12070.1;Glyma09g30140.1;Glyma09g34030.1;Glyma11g33350.1;Glyma14g08620.1;Glyma14g39260.1;Glyma17g36500.1;Glyma18g04880.1;Os02g0696900;Os03g0766500;Os08g0160300;Os08g0426866;Os09g0395300;POPTR_0001s02010;POPTR_0002s13170;POPTR_…
HORVU.MOREX.r3.5HG0424430.524	HvPUT1	TFmatrixID_0361	190	-	ctgGATAAga	Myb/SANT;MYB-related	AT1G70000;AT3G16350;AT5G47390;BRADI2G05590;BRADI2G05760;BRADI3G33400;Glyma01g00600.1;Glyma01g04530.1;Glyma02g03020.1;Glyma05g04950.1;Glyma05g36290.1;Glyma08g03330.1;Glyma08g40460.1;Glyma17g15330.1;Glyma18g31990.1;Os01g0187900;Os01g0192300;Os05g0195700;Os10g0561400;POPTR_0001s15510;POPTR_0003s07720;POPTR_0006s15480;POPTR_0008s19610;POPTR_0010s04860;Sb01g029020;Sb03g003270;Sb09g006060;GRMZM2G034110…
HORVU.MOREX.r3.5HG0424430.525	HvPUT1	TFmatrixID_0362	50	-	agcaAGATAcacg	Myb/SANT; ARR-B	AT5G58080;Glyma09g14650.1;Glyma15g24770.1;POPTR_0018s11960
HORVU.MOREX.r3.5HG0424430.526	HvPUT1	TFmatrixID_0363	1345	-	agCCCTAc	Myb/SANT; MYB-related	AT3G49850;AT5G67580
HORVU.MOREX.r3.5HG0424430.527	HvPUT1	TFmatrixID_0372	191	-	tGGATAaga	Myb/SANT;MYB-related	AT1G70000;AT3G16350;BRADI2G05590;BRADI2G05760;BRADI3G33400;Glyma01g00600.1;Glyma01g04530.1;Glyma02g03020.1;Glyma05g01640.1;Glyma05g04950.1;Glyma05g36290.1;Glyma08g03330.1;Glyma08g40460.1;Glyma13g43120.1;Glyma15g02250.1;Glyma17g10250.1;Glyma17g15330.1;Glyma18g17130.1;Os01g0187900;Os01g0192300;Os05g0195700;Os08g0151000;Os10g0561400;POPTR_0001s15510;POPTR_0001s19070;POPTR_0003s07720;POPTR_0006s15480…
HORVU.MOREX.r3.5HG0424430.528	HvPUT1	TFmatrixID_0374	188	+	gtctGGATAagag	Myb/SANT;MYB-related	BRADI2G05760;Glyma05g36290.1;Glyma08g03330.1;Os01g0192300;Os05g0195700;POPTR_0006s15480;POPTR_0008s19610;POPTR_0010s04860;Sb03g003100;Sb09g006060;GRMZM2G049695;GRMZM2G078636
HORVU.MOREX.r3.5HG0424430.529	HvPUT1	TFmatrixID_0382	1060	-	gcTTGACcg	NAC; NAM	AT1G01720;AT1G52880;AT1G52890;AT1G69490;AT3G04070;AT3G15500;AT3G15510;AT4G27410;BRADI1G17480;BRADI1G24390;BRADI1G63600;BRADI2G03467;BRADI2G53260;BRADI2G57100;Glyma01g06150.1;Glyma02g07700.1;Glyma02g12220.1;Glyma04g38560.1;Glyma05g32850.1;Glyma06g11970.1;Glyma06g16440.1;Glyma06g38410.1;Glyma06g38440.1;Glyma07g31220.1;Glyma07g35630.1;Glyma12g22790.1;Glyma12g22880.1;Glyma12g29360.1;Glyma12g34990.1;G…
HORVU.MOREX.r3.5HG0424430.530	HvPUT1	TFmatrixID_0391	21	+	gctgGCGTGg	NAC; NAM	AT1G76420;AT2G24430;AT3G04060;AT3G15170;AT3G18400;AT3G29035;AT5G18270;AT5G53950;BRADI1G14467;BRADI1G17440;BRADI1G63630;BRADI3G46900;BRADI4G34157;BRADI5G12407;Glyma02g07760.1;Glyma04g01650.1;Glyma04g33270.1;Glyma05g00930.1;Glyma05g35090.1;Glyma06g08440.1;Glyma06g21020.1;Glyma06g35660.1;Glyma07g10240.1;Glyma08g04610.1;Glyma09g31650.1;Glyma09g37050.1;Glyma12g26190.1;Glyma12g35530.1;Glyma13g05540.1;G…
HORVU.MOREX.r3.5HG0424430.531	HvPUT1	TFmatrixID_0393	21	+	gctgGCGTGg	NAC; NAM	AT1G76420;AT2G24430;AT3G04060;AT3G15170;AT3G18400;AT3G29035;AT5G18270;AT5G53950;BRADI1G14467;BRADI1G63630;BRADI3G46900;BRADI4G34157;BRADI5G12407;Glyma02g07760.1;Glyma04g01650.1;Glyma04g33270.1;Glyma05g00930.1;Glyma05g35090.1;Glyma06g08440.1;Glyma06g21020.1;Glyma06g35660.1;Glyma07g10240.1;Glyma08g04610.1;Glyma09g31650.1;Glyma09g37050.1;Glyma12g26190.1;Glyma12g35530.1;Glyma13g05540.1;Glyma13g34950.…
HORVU.MOREX.r3.5HG0424430.532	HvPUT1	TFmatrixID_0398	566	-	ttCGTACcg	SBP	AT1G69170;AT2G42200;AT2G47070;AT3G57920;AT5G43270;BRADI1G02760;BRADI1G26720;BRADI1G31390;BRADI2G59110;BRADI3G03510;BRADI3G05510;BRADI3G05720;BRADI3G40030;BRADI3G40240;BRADI3G41250;BRADI4G33770;BRADI5G24670;Glyma01g08060.1;Glyma01g15020.1;Glyma02g01160.1;Glyma02g13370.1;Glyma02g30670.1;Glyma03g27180.1;Glyma04g37390.1;Glyma05g00200.1;Glyma05g38180.1;Glyma06g36140.1;Glyma07g14610.1;Glyma07g19770.1;G…
HORVU.MOREX.r3.5HG0424430.533	HvPUT1	TFmatrixID_0398	1428	+	ctGTACGgg	SBP	AT1G69170;AT2G42200;AT2G47070;AT3G57920;AT5G43270;BRADI1G02760;BRADI1G26720;BRADI1G31390;BRADI2G59110;BRADI3G03510;BRADI3G05510;BRADI3G05720;BRADI3G40030;BRADI3G40240;BRADI3G41250;BRADI4G33770;BRADI5G24670;Glyma01g08060.1;Glyma01g15020.1;Glyma02g01160.1;Glyma02g13370.1;Glyma02g30670.1;Glyma03g27180.1;Glyma04g37390.1;Glyma05g00200.1;Glyma05g38180.1;Glyma06g36140.1;Glyma07g14610.1;Glyma07g19770.1;G…
HORVU.MOREX.r3.5HG0424430.534	HvPUT1	TFmatrixID_0399	565	-	cttCGTACcg	SBP	AT1G69170;AT2G42200;AT2G47070;AT3G57920;AT5G43270;BRADI1G02760;BRADI1G26720;BRADI1G31390;BRADI2G59110;BRADI3G05720;BRADI3G40240;BRADI3G41250;BRADI4G33770;BRADI4G34667;BRADI5G24670;Glyma01g08060.1;Glyma01g15020.1;Glyma02g01160.1;Glyma02g13370.1;Glyma02g30670.1;Glyma03g27180.1;Glyma05g00200.1;Glyma06g36140.1;Glyma07g14610.1;Glyma07g19770.1;Glyma07g31880.1;Glyma07g36180.1;Glyma09g09790.1;Glyma10g012…
HORVU.MOREX.r3.5HG0424430.535	HvPUT1	TFmatrixID_0399	1428	+	ctGTACGggc	SBP	AT1G69170;AT2G42200;AT2G47070;AT3G57920;AT5G43270;BRADI1G02760;BRADI1G26720;BRADI1G31390;BRADI2G59110;BRADI3G05720;BRADI3G40240;BRADI3G41250;BRADI4G33770;BRADI4G34667;BRADI5G24670;Glyma01g08060.1;Glyma01g15020.1;Glyma02g01160.1;Glyma02g13370.1;Glyma02g30670.1;Glyma03g27180.1;Glyma05g00200.1;Glyma06g36140.1;Glyma07g14610.1;Glyma07g19770.1;Glyma07g31880.1;Glyma07g36180.1;Glyma09g09790.1;Glyma10g012…
HORVU.MOREX.r3.5HG0424430.536	HvPUT1	TFmatrixID_0400	567	-	tCGTACcgc	SBP	AT1G20980;AT1G69170;AT2G42200;AT2G47070;AT3G57920;AT5G43270;BRADI1G02760;BRADI1G26720;BRADI1G31390;BRADI2G11240;BRADI2G59110;BRADI3G03510;BRADI3G05720;BRADI3G40240;BRADI3G41250;BRADI4G33770;BRADI4G34667;BRADI5G24670;Glyma01g08060.1;Glyma01g15020.1;Glyma02g01160.1;Glyma02g13370.1;Glyma02g30670.1;Glyma03g27180.1;Glyma04g37390.1;Glyma05g00200.1;Glyma05g38180.1;Glyma06g17700.1;Glyma06g22450.1;Glyma06…
HORVU.MOREX.r3.5HG0424430.537	HvPUT1	TFmatrixID_0400	1427	+	gctGTACGg	SBP	AT1G20980;AT1G69170;AT2G42200;AT2G47070;AT3G57920;AT5G43270;BRADI1G02760;BRADI1G26720;BRADI1G31390;BRADI2G11240;BRADI2G59110;BRADI3G03510;BRADI3G05720;BRADI3G40240;BRADI3G41250;BRADI4G33770;BRADI4G34667;BRADI5G24670;Glyma01g08060.1;Glyma01g15020.1;Glyma02g01160.1;Glyma02g13370.1;Glyma02g30670.1;Glyma03g27180.1;Glyma04g37390.1;Glyma05g00200.1;Glyma05g38180.1;Glyma06g17700.1;Glyma06g22450.1;Glyma06…
HORVU.MOREX.r3.5HG0424430.538	HvPUT1	TFmatrixID_0401	1426	+	tgctGTACGggc	SBP	AT1G27360;AT1G27370;AT1G69170;AT2G42200;AT3G57920;AT5G43270;BRADI1G31390;BRADI2G59110;BRADI3G03510;BRADI3G05510;BRADI3G05720;BRADI3G40240;BRADI3G41250;BRADI4G34667;BRADI5G24670;Glyma01g08060.1;Glyma01g15020.1;Glyma02g13370.1;Glyma02g30670.1;Glyma03g27180.1;Glyma04g37390.1;Glyma05g00200.1;Glyma05g38180.1;Glyma06g17700.1;Glyma06g22450.1;Glyma07g14610.1;Glyma07g19770.1;Glyma07g31880.1;Glyma08g01450.…
HORVU.MOREX.r3.5HG0424430.539	HvPUT1	TFmatrixID_0402	565	-	cttCGTACc	SBP	AT1G53160;AT1G69170;AT2G47070;AT3G57920;BRADI1G02760;BRADI1G26720;BRADI1G31390;BRADI3G05720;BRADI3G40240;BRADI4G34667;BRADI5G24670;Glyma01g15020.1;Glyma02g01160.1;Glyma03g27180.1;Glyma05g00200.1;Glyma05g38180.1;Glyma06g36140.1;Glyma07g14610.1;Glyma07g19770.1;Glyma07g31880.1;Glyma07g36180.1;Glyma08g01450.1;Glyma09g09790.1;Glyma10g01210.1;Glyma11g16700.1;Glyma12g27330.1;Glyma12g35460.1;Glyma13g2459…
HORVU.MOREX.r3.5HG0424430.540	HvPUT1	TFmatrixID_0402	1429	+	tGTACGggc	SBP	AT1G53160;AT1G69170;AT2G47070;AT3G57920;BRADI1G02760;BRADI1G26720;BRADI1G31390;BRADI3G05720;BRADI3G40240;BRADI4G34667;BRADI5G24670;Glyma01g15020.1;Glyma02g01160.1;Glyma03g27180.1;Glyma05g00200.1;Glyma05g38180.1;Glyma06g36140.1;Glyma07g14610.1;Glyma07g19770.1;Glyma07g31880.1;Glyma07g36180.1;Glyma08g01450.1;Glyma09g09790.1;Glyma10g01210.1;Glyma11g16700.1;Glyma12g27330.1;Glyma12g35460.1;Glyma13g2459…
HORVU.MOREX.r3.5HG0424430.541	HvPUT1	TFmatrixID_0403	566	+	ttCGTACcgc	SBP	AT1G27370;AT1G69170;AT1G76580;AT2G42200;AT2G47070;AT3G57920;AT5G43270;AT5G50570;AT5G50670;BRADI1G02760;BRADI1G26720;BRADI1G31390;BRADI2G59110;BRADI3G03510;BRADI3G05510;BRADI3G05720;BRADI3G40240;BRADI3G41250;BRADI4G33770;BRADI4G34667;BRADI5G24670;Glyma01g08060.1;Glyma01g15020.1;Glyma02g01160.1;Glyma02g13370.1;Glyma02g30670.1;Glyma03g27180.1;Glyma04g37390.1;Glyma05g00200.1;Glyma05g38180.1;Glyma06g1…
HORVU.MOREX.r3.5HG0424430.542	HvPUT1	TFmatrixID_0403	1427	-	gctGTACGgg	SBP	AT1G27370;AT1G69170;AT1G76580;AT2G42200;AT2G47070;AT3G57920;AT5G43270;AT5G50570;AT5G50670;BRADI1G02760;BRADI1G26720;BRADI1G31390;BRADI2G59110;BRADI3G03510;BRADI3G05510;BRADI3G05720;BRADI3G40240;BRADI3G41250;BRADI4G33770;BRADI4G34667;BRADI5G24670;Glyma01g08060.1;Glyma01g15020.1;Glyma02g01160.1;Glyma02g13370.1;Glyma02g30670.1;Glyma03g27180.1;Glyma04g37390.1;Glyma05g00200.1;Glyma05g38180.1;Glyma06g1…
HORVU.MOREX.r3.5HG0424430.543	HvPUT1	TFmatrixID_0404	1428	+	ctGTACGgg	SBP	AT1G69170;AT2G42200;AT2G47070;AT3G15270;BRADI1G02760;BRADI1G26720;BRADI1G31390;BRADI3G05510;BRADI3G05720;BRADI3G40030;BRADI3G40240;BRADI4G33770;Glyma01g15020.1;Glyma02g01160.1;Glyma02g30670.1;Glyma06g36140.1;Glyma07g19770.1;Glyma07g31880.1;Glyma07g36180.1;Glyma09g09790.1;Glyma10g01210.1;Glyma11g16700.1;Glyma12g27330.1;Glyma12g35460.1;Glyma13g24590.1;Glyma13g31090.1;Glyma13g35000.1;Glyma13g37130.1…
HORVU.MOREX.r3.5HG0424430.544	HvPUT1	TFmatrixID_0405	566	-	ttCGTACc	SBP	AT1G69170;AT2G42200;AT2G47070;AT3G57920;AT3G60030;AT5G43270;AT5G50570;AT5G50670;BRADI1G02760;BRADI1G26720;BRADI1G31390;BRADI2G11240;BRADI2G59110;BRADI3G03510;BRADI3G05510;BRADI3G05720;BRADI3G40240;BRADI3G41250;BRADI4G33770;BRADI4G34667;BRADI5G24670;Glyma01g08060.1;Glyma01g15020.1;Glyma02g01160.1;Glyma02g13370.1;Glyma02g30670.1;Glyma03g27180.1;Glyma04g37390.1;Glyma05g00200.1;Glyma05g38180.1;Glyma0…
HORVU.MOREX.r3.5HG0424430.545	HvPUT1	TFmatrixID_0405	1429	+	tGTACGgg	SBP	AT1G69170;AT2G42200;AT2G47070;AT3G57920;AT3G60030;AT5G43270;AT5G50570;AT5G50670;BRADI1G02760;BRADI1G26720;BRADI1G31390;BRADI2G11240;BRADI2G59110;BRADI3G03510;BRADI3G05510;BRADI3G05720;BRADI3G40240;BRADI3G41250;BRADI4G33770;BRADI4G34667;BRADI5G24670;Glyma01g08060.1;Glyma01g15020.1;Glyma02g01160.1;Glyma02g13370.1;Glyma02g30670.1;Glyma03g27180.1;Glyma04g37390.1;Glyma05g00200.1;Glyma05g38180.1;Glyma0…
HORVU.MOREX.r3.5HG0424430.546	HvPUT1	TFmatrixID_0406	565	-	cttCGTACc	SBP	AT5G18830;BRADI2G25580;Glyma13g28460.1;Os05g0408200;POPTR_0008s20160;POPTR_0010s02710;Sb09g020110;GRMZM2G109354
HORVU.MOREX.r3.5HG0424430.547	HvPUT1	TFmatrixID_0406	1429	+	tGTACGggc	SBP	AT5G18830;BRADI2G25580;Glyma13g28460.1;Os05g0408200;POPTR_0008s20160;POPTR_0010s02710;Sb09g020110;GRMZM2G109354
HORVU.MOREX.r3.5HG0424430.548	HvPUT1	TFmatrixID_0407	567	-	tCGTACc	SBP	AT1G69170;AT2G42200;AT2G47070;AT3G57920;AT5G43270;AT5G50570;AT5G50670;BRADI1G02760;BRADI1G26720;BRADI1G31390;BRADI2G59110;BRADI3G03510;BRADI3G05720;BRADI3G40240;BRADI3G41250;BRADI4G33770;BRADI4G34667;BRADI5G24670;Glyma01g08060.1;Glyma01g15020.1;Glyma02g01160.1;Glyma02g13370.1;Glyma02g30670.1;Glyma03g27180.1;Glyma04g37390.1;Glyma05g00200.1;Glyma05g38180.1;Glyma06g17700.1;Glyma06g22450.1;Glyma06g36…
HORVU.MOREX.r3.5HG0424430.549	HvPUT1	TFmatrixID_0407	1429	+	tGTACGg	SBP	AT1G69170;AT2G42200;AT2G47070;AT3G57920;AT5G43270;AT5G50570;AT5G50670;BRADI1G02760;BRADI1G26720;BRADI1G31390;BRADI2G59110;BRADI3G03510;BRADI3G05720;BRADI3G40240;BRADI3G41250;BRADI4G33770;BRADI4G34667;BRADI5G24670;Glyma01g08060.1;Glyma01g15020.1;Glyma02g01160.1;Glyma02g13370.1;Glyma02g30670.1;Glyma03g27180.1;Glyma04g37390.1;Glyma05g00200.1;Glyma05g38180.1;Glyma06g17700.1;Glyma06g22450.1;Glyma06g36…
HORVU.MOREX.r3.5HG0424430.550	HvPUT1	TFmatrixID_0408	566	-	ttCGTACcg	SBP	AT1G27370;AT1G69170;AT2G42200;AT2G47070;AT3G57920;AT5G43270;AT5G50570;AT5G50670;BRADI1G02760;BRADI1G26720;BRADI1G31390;BRADI2G11240;BRADI2G59110;BRADI3G03510;BRADI3G05510;BRADI3G05720;BRADI3G40030;BRADI3G40240;BRADI3G41250;BRADI4G33770;BRADI4G34667;BRADI5G24670;Glyma01g08060.1;Glyma01g15020.1;Glyma02g01160.1;Glyma02g13370.1;Glyma02g30670.1;Glyma03g27180.1;Glyma03g29900.1;Glyma04g37390.1;Glyma05g0…
HORVU.MOREX.r3.5HG0424430.551	HvPUT1	TFmatrixID_0408	1428	+	ctGTACGgg	SBP	AT1G27370;AT1G69170;AT2G42200;AT2G47070;AT3G57920;AT5G43270;AT5G50570;AT5G50670;BRADI1G02760;BRADI1G26720;BRADI1G31390;BRADI2G11240;BRADI2G59110;BRADI3G03510;BRADI3G05510;BRADI3G05720;BRADI3G40030;BRADI3G40240;BRADI3G41250;BRADI4G33770;BRADI4G34667;BRADI5G24670;Glyma01g08060.1;Glyma01g15020.1;Glyma02g01160.1;Glyma02g13370.1;Glyma02g30670.1;Glyma03g27180.1;Glyma03g29900.1;Glyma04g37390.1;Glyma05g0…
HORVU.MOREX.r3.5HG0424430.552	HvPUT1	TFmatrixID_0409	566	-	ttCGTACcgc	SBP	AT1G27370;AT1G69170;AT2G42200;AT2G47070;AT3G57920;AT5G43270;AT5G50570;AT5G50670;BRADI1G02760;BRADI1G26720;BRADI1G31390;BRADI2G59110;BRADI3G03510;BRADI3G05510;BRADI3G05720;BRADI3G40240;BRADI3G41250;BRADI4G33770;BRADI4G34667;BRADI5G24670;Glyma01g08060.1;Glyma01g15020.1;Glyma02g01160.1;Glyma02g13370.1;Glyma02g30670.1;Glyma03g27180.1;Glyma04g37390.1;Glyma05g00200.1;Glyma05g38180.1;Glyma06g17700.1;Gly…
HORVU.MOREX.r3.5HG0424430.553	HvPUT1	TFmatrixID_0409	1427	+	gctGTACGgg	SBP	AT1G27370;AT1G69170;AT2G42200;AT2G47070;AT3G57920;AT5G43270;AT5G50570;AT5G50670;BRADI1G02760;BRADI1G26720;BRADI1G31390;BRADI2G59110;BRADI3G03510;BRADI3G05510;BRADI3G05720;BRADI3G40240;BRADI3G41250;BRADI4G33770;BRADI4G34667;BRADI5G24670;Glyma01g08060.1;Glyma01g15020.1;Glyma02g01160.1;Glyma02g13370.1;Glyma02g30670.1;Glyma03g27180.1;Glyma04g37390.1;Glyma05g00200.1;Glyma05g38180.1;Glyma06g17700.1;Gly…
HORVU.MOREX.r3.5HG0424430.554	HvPUT1	TFmatrixID_0410	566	-	ttCGTACcg	SBP	AT1G27370;AT1G69170;AT2G42200;AT2G47070;AT3G57920;AT5G43270;AT5G50570;AT5G50670;BRADI1G02760;BRADI1G26720;BRADI1G31390;BRADI2G59110;BRADI3G03510;BRADI3G05510;BRADI3G05720;BRADI3G40030;BRADI3G40240;BRADI3G41250;BRADI4G33770;BRADI4G34667;BRADI5G24670;Glyma01g08060.1;Glyma01g15020.1;Glyma02g01160.1;Glyma02g13370.1;Glyma02g30670.1;Glyma03g27180.1;Glyma04g37390.1;Glyma05g00200.1;Glyma05g38180.1;Glyma0…
HORVU.MOREX.r3.5HG0424430.555	HvPUT1	TFmatrixID_0410	1428	+	ctGTACGgg	SBP	AT1G27370;AT1G69170;AT2G42200;AT2G47070;AT3G57920;AT5G43270;AT5G50570;AT5G50670;BRADI1G02760;BRADI1G26720;BRADI1G31390;BRADI2G59110;BRADI3G03510;BRADI3G05510;BRADI3G05720;BRADI3G40030;BRADI3G40240;BRADI3G41250;BRADI4G33770;BRADI4G34667;BRADI5G24670;Glyma01g08060.1;Glyma01g15020.1;Glyma02g01160.1;Glyma02g13370.1;Glyma02g30670.1;Glyma03g27180.1;Glyma04g37390.1;Glyma05g00200.1;Glyma05g38180.1;Glyma0…
HORVU.MOREX.r3.5HG0424430.556	HvPUT1	TFmatrixID_0411	567	-	tCGTACcgct	SBP	AT1G27370;AT1G69170;AT2G42200;AT2G47070;AT3G57920;AT5G43270;AT5G50570;AT5G50670;BRADI1G02760;BRADI1G26720;BRADI1G31390;BRADI2G59110;BRADI3G03510;BRADI3G05510;BRADI3G05720;BRADI3G40240;BRADI3G41250;BRADI4G33770;BRADI4G34667;BRADI5G24670;Glyma01g08060.1;Glyma01g15020.1;Glyma02g01160.1;Glyma02g13370.1;Glyma02g30670.1;Glyma03g27180.1;Glyma04g37390.1;Glyma05g00200.1;Glyma05g38180.1;Glyma06g17700.1;Gly…
HORVU.MOREX.r3.5HG0424430.557	HvPUT1	TFmatrixID_0411	1426	+	tgctGTACGg	SBP	AT1G27370;AT1G69170;AT2G42200;AT2G47070;AT3G57920;AT5G43270;AT5G50570;AT5G50670;BRADI1G02760;BRADI1G26720;BRADI1G31390;BRADI2G59110;BRADI3G03510;BRADI3G05510;BRADI3G05720;BRADI3G40240;BRADI3G41250;BRADI4G33770;BRADI4G34667;BRADI5G24670;Glyma01g08060.1;Glyma01g15020.1;Glyma02g01160.1;Glyma02g13370.1;Glyma02g30670.1;Glyma03g27180.1;Glyma04g37390.1;Glyma05g00200.1;Glyma05g38180.1;Glyma06g17700.1;Gly…
HORVU.MOREX.r3.5HG0424430.558	HvPUT1	TFmatrixID_0412	1038	+	actTAATTat	Sox; YABBY	AT1G23420
HORVU.MOREX.r3.5HG0424430.559	HvPUT1	TFmatrixID_0412	1040	-	ttAATTAtgg	Sox; YABBY	AT1G23420
HORVU.MOREX.r3.5HG0424430.560	HvPUT1	TFmatrixID_0413	1106	-	ATGATta	Sox; YABBY	AT2G26580;AT4G00180;Glyma13g22620.1;Glyma17g12200.1;POPTR_0006s06700;POPTR_0018s12990
HORVU.MOREX.r3.5HG0424430.561	HvPUT1	TFmatrixID_0413	1225	-	ATGATta	Sox; YABBY	AT2G26580;AT4G00180;Glyma13g22620.1;Glyma17g12200.1;POPTR_0006s06700;POPTR_0018s12990
HORVU.MOREX.r3.5HG0424430.562	HvPUT1	TFmatrixID_0413	1257	-	ATGATta	Sox; YABBY	AT2G26580;AT4G00180;Glyma13g22620.1;Glyma17g12200.1;POPTR_0006s06700;POPTR_0018s12990
HORVU.MOREX.r3.5HG0424430.563	HvPUT1	TFmatrixID_0413	1323	+	taATCAT	Sox; YABBY	AT2G26580;AT4G00180;Glyma13g22620.1;Glyma17g12200.1;POPTR_0006s06700;POPTR_0018s12990
HORVU.MOREX.r3.5HG0424430.564	HvPUT1	TFmatrixID_0417	458	+	aaCGACCca	Storekeeper;GeBP	BRADI1G20210;BRADI1G61477;Os03g0370250;Os07g0636100;Sb01g034370;Sb02g040550;GRMZM2G026417;GRMZM2G030458;GRMZM2G075122;GRMZM2G082318
HORVU.MOREX.r3.5HG0424430.565	HvPUT1	TFmatrixID_0418	1328	+	ATATAaa	TBP	AT1G55520;AT3G13445;BRADI1G13220;BRADI3G27190;BRADI4G01150;Glyma03g04500.1;Glyma09g41330.1;Glyma16g25450.1;Glyma18g44460.1;Glyma19g28780.1;Os10g0432300;Os12g0580300;POPTR_0013s05580;POPTR_0019s04890;Sb01g012880;Sb01g017130;Sb01g021297;Sb08g022273;GRMZM2G149238;GRMZM2G161418
HORVU.MOREX.r3.5HG0424430.566	HvPUT1	TFmatrixID_0419	1008	+	aaTATAT	TBP	AT1G55520;AT3G13445;BRADI1G13220;BRADI3G27190;BRADI4G01150;Glyma03g04500.1;Glyma09g41330.1;Glyma16g25450.1;Glyma18g44460.1;Glyma19g28780.1;Os10g0432300;Os12g0580300;POPTR_0013s05580;POPTR_0019s04890;Sb01g012880;Sb01g017130;Sb01g021297;Sb08g022273;GRMZM2G149238;GRMZM2G161418
HORVU.MOREX.r3.5HG0424430.567	HvPUT1	TFmatrixID_0419	1009	-	ATATAtt	TBP	AT1G55520;AT3G13445;BRADI1G13220;BRADI3G27190;BRADI4G01150;Glyma03g04500.1;Glyma09g41330.1;Glyma16g25450.1;Glyma18g44460.1;Glyma19g28780.1;Os10g0432300;Os12g0580300;POPTR_0013s05580;POPTR_0019s04890;Sb01g012880;Sb01g017130;Sb01g021297;Sb08g022273;GRMZM2G149238;GRMZM2G161418
HORVU.MOREX.r3.5HG0424430.568	HvPUT1	TFmatrixID_0419	1218	-	ATATAtt	TBP	AT1G55520;AT3G13445;BRADI1G13220;BRADI3G27190;BRADI4G01150;Glyma03g04500.1;Glyma09g41330.1;Glyma16g25450.1;Glyma18g44460.1;Glyma19g28780.1;Os10g0432300;Os12g0580300;POPTR_0013s05580;POPTR_0019s04890;Sb01g012880;Sb01g017130;Sb01g021297;Sb08g022273;GRMZM2G149238;GRMZM2G161418
HORVU.MOREX.r3.5HG0424430.569	HvPUT1	TFmatrixID_0420	581	+	ctGGGCCcca	TCP	AT1G35560;AT1G58100;AT1G72010;AT2G45680;BRADI1G45220;BRADI2G59240;BRADI3G59320;BRADI4G24550;BRADI4G35520;BRADI4G35670;BRADI4G41430;BRADI5G02880;Glyma02g11780.1;Glyma03g02090.1;Glyma05g01130.1;Glyma05g03610.1;Glyma06g20660.1;Glyma07g08710.1;Glyma07g25430.1;Glyma08g41070.1;Glyma10g38510.1;Glyma11g20200.1;Glyma12g28970.1;Glyma13g20710.1;Glyma16g00580.1;Glyma17g14160.1;Glyma18g15410.1;Glyma20g29330.1…
HORVU.MOREX.r3.5HG0424430.570	HvPUT1	TFmatrixID_0420	581	-	ctgGGCCCca	TCP	AT1G35560;AT1G58100;AT1G72010;AT2G45680;BRADI1G45220;BRADI2G59240;BRADI3G59320;BRADI4G24550;BRADI4G35520;BRADI4G35670;BRADI4G41430;BRADI5G02880;Glyma02g11780.1;Glyma03g02090.1;Glyma05g01130.1;Glyma05g03610.1;Glyma06g20660.1;Glyma07g08710.1;Glyma07g25430.1;Glyma08g41070.1;Glyma10g38510.1;Glyma11g20200.1;Glyma12g28970.1;Glyma13g20710.1;Glyma16g00580.1;Glyma17g14160.1;Glyma18g15410.1;Glyma20g29330.1…
HORVU.MOREX.r3.5HG0424430.571	HvPUT1	TFmatrixID_0421	205	-	tGGTGCcact	TCP	AT1G30210;AT1G67260;AT1G68800;AT3G02150;AT3G18550;BRADI1G06460;BRADI1G11060;BRADI1G58450;BRADI2G20060;BRADI2G50687;Glyma04g22460.1;Glyma04g32340.1;Glyma05g00300.1;Glyma05g27370.1;Glyma06g22240.1;Glyma06g23410.1;Glyma06g34330.1;Glyma08g10350.1;Glyma08g27150.1;Glyma08g28690.1;Glyma10g39140.1;Glyma13g07480.1;Glyma13g29160.1;Glyma13g36840.1;Glyma15g09910.1;Glyma17g13060.1;Glyma18g50370.1;Glyma18g5158…
HORVU.MOREX.r3.5HG0424430.572	HvPUT1	TFmatrixID_0421	365	+	aaatGCACCa	TCP	AT1G30210;AT1G67260;AT1G68800;AT3G02150;AT3G18550;BRADI1G06460;BRADI1G11060;BRADI1G58450;BRADI2G20060;BRADI2G50687;Glyma04g22460.1;Glyma04g32340.1;Glyma05g00300.1;Glyma05g27370.1;Glyma06g22240.1;Glyma06g23410.1;Glyma06g34330.1;Glyma08g10350.1;Glyma08g27150.1;Glyma08g28690.1;Glyma10g39140.1;Glyma13g07480.1;Glyma13g29160.1;Glyma13g36840.1;Glyma15g09910.1;Glyma17g13060.1;Glyma18g50370.1;Glyma18g5158…
HORVU.MOREX.r3.5HG0424430.573	HvPUT1	TFmatrixID_0421	897	-	tGGTGCctag	TCP	AT1G30210;AT1G67260;AT1G68800;AT3G02150;AT3G18550;BRADI1G06460;BRADI1G11060;BRADI1G58450;BRADI2G20060;BRADI2G50687;Glyma04g22460.1;Glyma04g32340.1;Glyma05g00300.1;Glyma05g27370.1;Glyma06g22240.1;Glyma06g23410.1;Glyma06g34330.1;Glyma08g10350.1;Glyma08g27150.1;Glyma08g28690.1;Glyma10g39140.1;Glyma13g07480.1;Glyma13g29160.1;Glyma13g36840.1;Glyma15g09910.1;Glyma17g13060.1;Glyma18g50370.1;Glyma18g5158…
HORVU.MOREX.r3.5HG0424430.574	HvPUT1	TFmatrixID_0422	26	-	cgtGGTCCga	TCP	AT1G53230;BRADI2G06890;Glyma12g20160.1;Glyma12g33640.1;Glyma12g35720.1;Glyma13g34690.1;POPTR_0013s12370;POPTR_0019s12110;Sb03g001940;Sb03g034918;AC205574.3_FG006;GRMZM2G015037
HORVU.MOREX.r3.5HG0424430.575	HvPUT1	TFmatrixID_0423	27	-	gtGGTCCg	TCP	AT2G31070;AT3G15030;BRADI2G06890;BRADI2G50190;Glyma06g34330.1;Glyma06g43720.1;Glyma12g14200.1;Glyma12g20160.1;Glyma12g33640.1;Glyma12g35720.1;Glyma13g34690.1;Glyma13g36840.1;POPTR_0001s38480;POPTR_0011s09890;POPTR_0013s12370;POPTR_0019s12110;Sb03g001940;Sb03g034918;AC205574.3_FG006;GRMZM2G015037
HORVU.MOREX.r3.5HG0424430.576	HvPUT1	TFmatrixID_0424	584	+	ggcCCCACga	TCP	AT1G35560;AT1G58100;AT2G45680;AT3G27010;AT5G08330;AT5G23280;AT5G41030;BRADI1G45220;BRADI2G59240;BRADI3G49660;BRADI3G59320;BRADI4G24550;BRADI4G35520;BRADI4G35670;BRADI4G41430;BRADI5G02880;BRADI5G16270;Glyma02g11780.1;Glyma03g02090.1;Glyma05g01130.1;Glyma05g03610.1;Glyma06g20660.1;Glyma07g08710.1;Glyma07g25430.1;Glyma08g41070.1;Glyma09g42140.1;Glyma10g06510.1;Glyma10g38510.1;Glyma10g43190.1;Glyma11…
HORVU.MOREX.r3.5HG0424430.577	HvPUT1	TFmatrixID_0424	755	-	ggGTGGGcac	TCP	AT1G35560;AT1G58100;AT2G45680;AT3G27010;AT5G08330;AT5G23280;AT5G41030;BRADI1G45220;BRADI2G59240;BRADI3G49660;BRADI3G59320;BRADI4G24550;BRADI4G35520;BRADI4G35670;BRADI4G41430;BRADI5G02880;BRADI5G16270;Glyma02g11780.1;Glyma03g02090.1;Glyma05g01130.1;Glyma05g03610.1;Glyma06g20660.1;Glyma07g08710.1;Glyma07g25430.1;Glyma08g41070.1;Glyma09g42140.1;Glyma10g06510.1;Glyma10g38510.1;Glyma10g43190.1;Glyma11…
HORVU.MOREX.r3.5HG0424430.578	HvPUT1	TFmatrixID_0425	581	+	ctGGGCCcca	TCP	AT1G67260;AT1G68800;AT2G31070;AT3G02150;AT4G18390;BRADI1G06460;BRADI1G11060;BRADI1G58450;BRADI2G20060;BRADI2G50687;Glyma05g27370.1;Glyma06g22240.1;Glyma06g34330.1;Glyma08g10350.1;Glyma08g27150.1;Glyma08g28690.1;Glyma10g39140.1;Glyma13g07480.1;Glyma13g29160.1;Glyma13g36840.1;Glyma15g09910.1;Glyma17g13060.1;Glyma18g50370.1;Glyma19g05910.1;Glyma20g28670.1;Os01g0763200;Os03g0706500;Os03g0785800;Os05g…
HORVU.MOREX.r3.5HG0424430.579	HvPUT1	TFmatrixID_0425	581	-	ctgGGCCCca	TCP	AT1G67260;AT1G68800;AT2G31070;AT3G02150;AT4G18390;BRADI1G06460;BRADI1G11060;BRADI1G58450;BRADI2G20060;BRADI2G50687;Glyma05g27370.1;Glyma06g22240.1;Glyma06g34330.1;Glyma08g10350.1;Glyma08g27150.1;Glyma08g28690.1;Glyma10g39140.1;Glyma13g07480.1;Glyma13g29160.1;Glyma13g36840.1;Glyma15g09910.1;Glyma17g13060.1;Glyma18g50370.1;Glyma19g05910.1;Glyma20g28670.1;Os01g0763200;Os03g0706500;Os03g0785800;Os05g…
HORVU.MOREX.r3.5HG0424430.580	HvPUT1	TFmatrixID_0426	582	+	tgggcCCCAC	TCP	AT1G35560;AT1G58100;AT2G45680;AT5G08330;AT5G23280;AT5G51910;BRADI1G45220;BRADI2G59240;BRADI3G49660;BRADI3G59320;BRADI4G24550;BRADI4G35520;BRADI4G35670;BRADI4G41430;BRADI5G02880;BRADI5G16270;Glyma02g11780.1;Glyma03g02090.1;Glyma05g01130.1;Glyma05g03610.1;Glyma06g20660.1;Glyma07g08710.1;Glyma07g25430.1;Glyma08g41070.1;Glyma09g42140.1;Glyma10g38510.1;Glyma10g43190.1;Glyma11g20200.1;Glyma12g28970.1;G…
HORVU.MOREX.r3.5HG0424430.581	HvPUT1	TFmatrixID_0427	27	-	gtGGTCCg	TCP	AT3G02150;AT5G08070;AT5G60970;Glyma04g32340.1;Glyma05g00300.1;Glyma06g22240.1;Glyma08g27150.1;Glyma17g08760.1;Glyma18g50370.1;Glyma19g03810.1;POPTR_0004s11510;POPTR_0015s06980;POPTR_0017s13050;GRMZM2G120151;GRMZM2G166946
HORVU.MOREX.r3.5HG0424430.582	HvPUT1	TFmatrixID_0429	584	+	ggcCCCAC	TCP	AT1G35560;AT1G58100;AT2G45680;AT5G08330;AT5G23280;AT5G41030;BRADI1G45220;BRADI2G59240;BRADI3G49660;BRADI3G59320;BRADI4G24550;BRADI4G35520;BRADI4G35670;BRADI4G41430;BRADI5G02880;BRADI5G16270;Glyma02g11780.1;Glyma03g02090.1;Glyma05g01130.1;Glyma05g03610.1;Glyma06g20660.1;Glyma07g08710.1;Glyma07g25430.1;Glyma08g41070.1;Glyma09g42140.1;Glyma10g06510.1;Glyma10g38510.1;Glyma10g43190.1;Glyma11g20200.1;G…
HORVU.MOREX.r3.5HG0424430.583	HvPUT1	TFmatrixID_0429	757	-	GTGGGcac	TCP	AT1G35560;AT1G58100;AT2G45680;AT5G08330;AT5G23280;AT5G41030;BRADI1G45220;BRADI2G59240;BRADI3G49660;BRADI3G59320;BRADI4G24550;BRADI4G35520;BRADI4G35670;BRADI4G41430;BRADI5G02880;BRADI5G16270;Glyma02g11780.1;Glyma03g02090.1;Glyma05g01130.1;Glyma05g03610.1;Glyma06g20660.1;Glyma07g08710.1;Glyma07g25430.1;Glyma08g41070.1;Glyma09g42140.1;Glyma10g06510.1;Glyma10g38510.1;Glyma10g43190.1;Glyma11g20200.1;G…
HORVU.MOREX.r3.5HG0424430.584	HvPUT1	TFmatrixID_0430	584	+	ggcCCCAC	TCP	AT1G67260;AT1G68800;AT2G31070;AT3G02150;BRADI1G06460;BRADI1G11060;BRADI1G58450;BRADI2G20060;BRADI2G50687;Glyma04g22460.1;Glyma05g27370.1;Glyma06g22240.1;Glyma06g34330.1;Glyma08g10350.1;Glyma08g27150.1;Glyma10g39140.1;Glyma13g07480.1;Glyma13g29160.1;Glyma13g36840.1;Glyma15g09910.1;Glyma17g13060.1;Glyma18g50370.1;Glyma19g05910.1;Glyma20g28670.1;Os01g0763200;Os03g0706500;Os03g0785800;Os05g0513100;LO…
HORVU.MOREX.r3.5HG0424430.585	HvPUT1	TFmatrixID_0431	584	+	ggcCCCAC	TCP	AT1G35560;AT1G58100;AT1G72010;AT2G45680;AT5G23280;BRADI1G45220;BRADI2G59240;BRADI3G49660;BRADI3G59320;BRADI4G24550;BRADI4G35520;BRADI4G35670;BRADI4G41430;BRADI5G02880;BRADI5G16270;Glyma02g11780.1;Glyma03g02090.1;Glyma05g01130.1;Glyma05g03610.1;Glyma06g20660.1;Glyma07g08710.1;Glyma07g25430.1;Glyma08g41070.1;Glyma09g42140.1;Glyma10g38510.1;Glyma10g43190.1;Glyma11g20200.1;Glyma12g28970.1;Glyma13g207…
HORVU.MOREX.r3.5HG0424430.586	HvPUT1	TFmatrixID_0431	757	-	GTGGGcac	TCP	AT1G35560;AT1G58100;AT1G72010;AT2G45680;AT5G23280;BRADI1G45220;BRADI2G59240;BRADI3G49660;BRADI3G59320;BRADI4G24550;BRADI4G35520;BRADI4G35670;BRADI4G41430;BRADI5G02880;BRADI5G16270;Glyma02g11780.1;Glyma03g02090.1;Glyma05g01130.1;Glyma05g03610.1;Glyma06g20660.1;Glyma07g08710.1;Glyma07g25430.1;Glyma08g41070.1;Glyma09g42140.1;Glyma10g38510.1;Glyma10g43190.1;Glyma11g20200.1;Glyma12g28970.1;Glyma13g207…
HORVU.MOREX.r3.5HG0424430.587	HvPUT1	TFmatrixID_0432	27	-	gtGGTCCg	TCP	AT3G02150;AT5G08070;Glyma04g32340.1;Glyma05g00300.1;Glyma06g22240.1;Glyma08g27150.1;Glyma17g08760.1;Glyma18g50370.1;Glyma19g03810.1;Os01g0763200;POPTR_0004s11510;POPTR_0015s06980;POPTR_0017s13050;Sb03g035350;GRMZM2G120151;GRMZM2G166946
HORVU.MOREX.r3.5HG0424430.588	HvPUT1	TFmatrixID_0433	582	+	tgggcCCCAC	TCP	AT1G35560;AT1G58100;AT1G72010;AT2G45680;AT5G08330;AT5G23280;BRADI1G45220;BRADI2G59240;BRADI3G49660;BRADI3G59320;BRADI4G24550;BRADI4G35520;BRADI4G35670;BRADI4G41430;BRADI5G02880;BRADI5G16270;Glyma02g11780.1;Glyma03g02090.1;Glyma05g01130.1;Glyma05g03610.1;Glyma06g20660.1;Glyma07g08710.1;Glyma07g25430.1;Glyma08g41070.1;Glyma09g42140.1;Glyma10g38510.1;Glyma10g43190.1;Glyma11g20200.1;Glyma12g28970.1;G…
HORVU.MOREX.r3.5HG0424430.589	HvPUT1	TFmatrixID_0434	581	+	ctGGGCCcca	TCP	AT1G35560;AT2G45680;AT5G08330;AT5G23280;BRADI2G59240;BRADI3G49660;BRADI3G60350;BRADI4G24550;BRADI4G35520;BRADI4G35670;BRADI4G41430;BRADI5G02880;BRADI5G16270;Glyma02g11780.1;Glyma03g02090.1;Glyma05g01130.1;Glyma05g03610.1;Glyma07g08710.1;Glyma08g41070.1;Glyma09g42120.1;Glyma09g42140.1;Glyma10g06510.1;Glyma10g38510.1;Glyma10g43190.1;Glyma11g20200.1;Glyma13g20710.1;Glyma16g00580.1;Glyma17g14160.1;Gl…
HORVU.MOREX.r3.5HG0424430.590	HvPUT1	TFmatrixID_0434	581	-	ctgGGCCCca	TCP	AT1G35560;AT2G45680;AT5G08330;AT5G23280;BRADI2G59240;BRADI3G49660;BRADI3G60350;BRADI4G24550;BRADI4G35520;BRADI4G35670;BRADI4G41430;BRADI5G02880;BRADI5G16270;Glyma02g11780.1;Glyma03g02090.1;Glyma05g01130.1;Glyma05g03610.1;Glyma07g08710.1;Glyma08g41070.1;Glyma09g42120.1;Glyma09g42140.1;Glyma10g06510.1;Glyma10g38510.1;Glyma10g43190.1;Glyma11g20200.1;Glyma13g20710.1;Glyma16g00580.1;Glyma17g14160.1;Gl…
HORVU.MOREX.r3.5HG0424430.591	HvPUT1	TFmatrixID_0435	584	+	ggcCCCAC	TCP	AT1G35560;AT2G45680;AT5G08330;AT5G23280;BRADI2G59240;BRADI3G49660;BRADI3G60350;BRADI4G24550;BRADI4G35520;BRADI4G35670;BRADI4G41430;BRADI5G02880;BRADI5G16270;Glyma02g11780.1;Glyma03g02090.1;Glyma05g01130.1;Glyma05g03610.1;Glyma07g08710.1;Glyma08g41070.1;Glyma09g42120.1;Glyma09g42140.1;Glyma10g06510.1;Glyma10g38510.1;Glyma10g43190.1;Glyma11g20200.1;Glyma13g20710.1;Glyma16g00580.1;Glyma17g14160.1;Gl…
HORVU.MOREX.r3.5HG0424430.592	HvPUT1	TFmatrixID_0436	27	-	gtGGTCCgat	TCP	AT2G31070;BRADI2G06890;BRADI2G50190;Glyma06g34330.1;Glyma06g43720.1;Glyma12g14200.1;Glyma12g20160.1;Glyma12g33640.1;Glyma12g35720.1;Glyma13g34690.1;Glyma13g36840.1;POPTR_0001s38480;POPTR_0011s09890;POPTR_0013s12370;POPTR_0019s12110;Sb03g001940;Sb03g034918;AC205574.3_FG006;GRMZM2G015037
HORVU.MOREX.r3.5HG0424430.593	HvPUT1	TFmatrixID_0437	583	+	gggcCCCACg	TCP	AT1G35560;AT1G58100;AT2G45680;AT5G08330;AT5G23280;BRADI1G45220;BRADI2G59240;BRADI3G49660;BRADI3G59320;BRADI4G24550;BRADI4G35520;BRADI4G35670;BRADI4G41430;BRADI5G02880;BRADI5G16270;Glyma02g11780.1;Glyma03g02090.1;Glyma05g01130.1;Glyma05g03610.1;Glyma06g20660.1;Glyma07g08710.1;Glyma07g25430.1;Glyma08g41070.1;Glyma09g42140.1;Glyma10g38510.1;Glyma10g43190.1;Glyma11g20200.1;Glyma12g28970.1;Glyma13g207…
HORVU.MOREX.r3.5HG0424430.594	HvPUT1	TFmatrixID_0437	756	-	gGTGGGcact	TCP	AT1G35560;AT1G58100;AT2G45680;AT5G08330;AT5G23280;BRADI1G45220;BRADI2G59240;BRADI3G49660;BRADI3G59320;BRADI4G24550;BRADI4G35520;BRADI4G35670;BRADI4G41430;BRADI5G02880;BRADI5G16270;Glyma02g11780.1;Glyma03g02090.1;Glyma05g01130.1;Glyma05g03610.1;Glyma06g20660.1;Glyma07g08710.1;Glyma07g25430.1;Glyma08g41070.1;Glyma09g42140.1;Glyma10g38510.1;Glyma10g43190.1;Glyma11g20200.1;Glyma12g28970.1;Glyma13g207…
HORVU.MOREX.r3.5HG0424430.595	HvPUT1	TFmatrixID_0438	583	+	gggcCCCAC	TCP	AT1G35560;AT1G58100;AT1G72010;AT2G45680;AT5G08330;AT5G23280;AT5G41030;BRADI1G45220;BRADI2G59240;BRADI3G49660;BRADI3G59320;BRADI4G24550;BRADI4G35520;BRADI4G35670;BRADI4G41430;BRADI5G02880;BRADI5G16270;Glyma02g11780.1;Glyma03g02090.1;Glyma05g01130.1;Glyma05g03610.1;Glyma06g20660.1;Glyma07g08710.1;Glyma07g25430.1;Glyma08g41070.1;Glyma09g42140.1;Glyma10g06510.1;Glyma10g38510.1;Glyma10g43190.1;Glyma11…
HORVU.MOREX.r3.5HG0424430.596	HvPUT1	TFmatrixID_0439	584	+	ggcCCCAC	TCP	AT1G35560;AT1G58100;AT1G72010;AT2G45680;AT5G23280;BRADI1G45220;BRADI2G59240;BRADI3G49660;BRADI3G59320;BRADI4G24550;BRADI4G35520;BRADI4G35670;BRADI4G41430;BRADI5G02880;BRADI5G16270;Glyma02g11780.1;Glyma03g02090.1;Glyma05g01130.1;Glyma05g03610.1;Glyma06g20660.1;Glyma07g08710.1;Glyma07g25430.1;Glyma08g41070.1;Glyma09g42140.1;Glyma10g06510.1;Glyma10g38510.1;Glyma10g43190.1;Glyma11g20200.1;Glyma12g289…
HORVU.MOREX.r3.5HG0424430.597	HvPUT1	TFmatrixID_0440	27	-	gtGGTCCg	TCP	AT1G67260;AT2G31070;AT3G02150;BRADI1G06460;BRADI1G58450;BRADI2G20060;BRADI2G50687;Glyma04g32340.1;Glyma05g00300.1;Glyma05g27370.1;Glyma06g22240.1;Glyma06g34330.1;Glyma08g10350.1;Glyma08g27150.1;Glyma08g28690.1;Glyma10g39140.1;Glyma13g07480.1;Glyma13g29160.1;Glyma13g36840.1;Glyma15g09910.1;Glyma17g13060.1;Glyma18g50370.1;Glyma18g51580.1;Glyma19g05910.1;Glyma20g28670.1;Os01g0763200;Os03g0706500;Os0…
HORVU.MOREX.r3.5HG0424430.598	HvPUT1	TFmatrixID_0440	1378	-	ctGGTCCt	TCP	AT1G67260;AT2G31070;AT3G02150;BRADI1G06460;BRADI1G58450;BRADI2G20060;BRADI2G50687;Glyma04g32340.1;Glyma05g00300.1;Glyma05g27370.1;Glyma06g22240.1;Glyma06g34330.1;Glyma08g10350.1;Glyma08g27150.1;Glyma08g28690.1;Glyma10g39140.1;Glyma13g07480.1;Glyma13g29160.1;Glyma13g36840.1;Glyma15g09910.1;Glyma17g13060.1;Glyma18g50370.1;Glyma18g51580.1;Glyma19g05910.1;Glyma20g28670.1;Os01g0763200;Os03g0706500;Os0…
HORVU.MOREX.r3.5HG0424430.599	HvPUT1	TFmatrixID_0443	1061	-	cTTGACcg	WRKY	AT1G29860;AT1G64000;AT1G66550;AT1G66560;AT1G66600;AT1G68150;AT1G69810;AT1G80590;AT2G40740;AT2G40750;AT2G44745;AT2G46400;AT3G01970;AT3G56400;AT3G62340;AT4G04450;AT4G11070;AT4G18170;AT4G23810;AT4G39410;AT5G22570;AT5G26170;AT5G41570;AT5G43290;AT5G45050;AT5G45260;BRADI1G08106;BRADI1G17660;BRADI1G48770;BRADI1G59180;BRADI1G63220;BRADI1G63910;BRADI2G05234;BRADI2G05500;BRADI2G05510;BRADI2G11170;BRADI2G15…
HORVU.MOREX.r3.5HG0424430.600	HvPUT1	TFmatrixID_0445	1061	-	cTTGACcg	WRKY	AT1G18860;AT1G29280;AT1G29860;AT1G55600;AT1G62300;AT1G64000;AT1G68150;AT1G69810;AT1G80840;AT2G21900;AT2G34830;AT2G44745;AT3G01970;AT3G04670;AT3G58710;AT3G62340;AT4G04450;AT4G18170;AT4G22070;AT4G24240;AT4G39410;AT5G15130;AT5G26170;AT5G28650;AT5G41570;AT5G43290;AT5G45050;AT5G45260;BRADI1G08106;BRADI1G09170;BRADI1G14300;BRADI1G30870;BRADI1G59180;BRADI2G05234;BRADI2G05500;BRADI2G05510;BRADI2G08620;BR…
HORVU.MOREX.r3.5HG0424430.601	HvPUT1	TFmatrixID_0448	1059	-	tgcTTGACcga	WRKY	AT1G18860;AT1G29280;AT1G29860;AT1G55600;AT1G62300;AT1G64000;AT1G68150;AT1G69810;AT2G21900;AT2G25000;AT2G34830;AT2G44745;AT2G46400;AT3G01970;AT3G04670;AT3G58710;AT3G62340;AT4G04450;AT4G11070;AT4G18170;AT4G22070;AT4G24240;AT4G39410;AT5G15130;AT5G26170;AT5G28650;AT5G41570;AT5G43290;AT5G45050;BRADI1G08106;BRADI1G09170;BRADI1G13207;BRADI1G14300;BRADI1G30870;BRADI1G59180;BRADI2G05234;BRADI2G05500;BRADI…
HORVU.MOREX.r3.5HG0424430.602	HvPUT1	TFmatrixID_0449	1061	-	cTTGACcg	WRKY	AT1G13960;AT2G03340;AT2G30250;AT2G37260;AT3G01080;AT4G12020;AT4G26440;AT4G26640;AT4G30935;AT5G07100;BRADI1G02327;BRADI1G07970;BRADI1G16120;BRADI1G22680;BRADI1G23340;BRADI1G47690;BRADI2G00280;BRADI2G22440;BRADI2G53760;BRADI3G19640;BRADI3G39340;BRADI4G01950;BRADI4G06690;BRADI4G09890;BRADI4G33370;BRADI4G45290;BRADI5G13090;Glyma01g06550.1;Glyma01g31920.1;Glyma02g12490.1;Glyma02g36510.1;Glyma02g39870.…
HORVU.MOREX.r3.5HG0424430.603	HvPUT1	TFmatrixID_0458	1060	-	gcTTGACcga	WRKY	AT1G18860;AT1G29280;AT1G29860;AT1G55600;AT1G62300;AT1G64000;AT1G68150;AT1G69810;AT2G21900;AT2G34830;AT2G40740;AT2G44745;AT2G46400;AT3G01970;AT3G04670;AT3G58710;AT3G62340;AT4G04450;AT4G11070;AT4G18170;AT4G22070;AT4G24240;AT4G31800;AT4G39410;AT5G15130;AT5G26170;AT5G28650;AT5G41570;AT5G43290;AT5G45050;BRADI1G08106;BRADI1G09170;BRADI1G14300;BRADI1G30870;BRADI1G59180;BRADI2G05234;BRADI2G05500;BRADI2G0…
HORVU.MOREX.r3.5HG0424430.604	HvPUT1	TFmatrixID_0465	1061	-	cTTGACcg	WRKY	AT1G13960;AT2G03340;AT2G37260;AT3G01080;AT4G12020;AT4G26440;AT4G26640;AT4G30935;AT5G07100;AT5G56270;BRADI1G02327;BRADI1G07970;BRADI1G16120;BRADI1G22680;BRADI1G23340;BRADI1G47690;BRADI2G00280;BRADI2G22440;BRADI2G53760;BRADI3G19640;BRADI3G39340;BRADI4G01950;BRADI4G06690;BRADI4G09890;BRADI4G33370;BRADI4G45290;BRADI5G13090;Glyma01g06550.1;Glyma01g31920.1;Glyma02g12490.1;Glyma02g36510.1;Glyma02g39870.…
HORVU.MOREX.r3.5HG0424430.605	HvPUT1	TFmatrixID_0466	1060	-	gcTTGACcga	WRKY	AT1G18860;AT1G29280;AT1G29860;AT1G55600;AT1G62300;AT1G64000;AT1G68150;AT1G69810;AT2G21900;AT2G34830;AT2G44745;AT3G01970;AT3G04670;AT3G58710;AT3G62340;AT4G04450;AT4G18170;AT4G22070;AT4G24240;AT4G39410;AT5G15130;AT5G26170;AT5G28650;AT5G41570;AT5G43290;AT5G45050;AT5G64810;BRADI1G08106;BRADI1G09170;BRADI1G14300;BRADI1G30870;BRADI1G59180;BRADI2G05234;BRADI2G05500;BRADI2G05510;BRADI2G08620;BRADI2G11170…
HORVU.MOREX.r3.5HG0424430.606	HvPUT1	TFmatrixID_0467	1057	-	tctgcTTGACcga	WRKY	Os01g0656400;POPTR_0002s17010;POPTR_0012s01380;POPTR_0014s09190;Sb06g013835;AC205562.3_FG002
HORVU.MOREX.r3.5HG0424430.607	HvPUT1	TFmatrixID_0472	307	-	tGCTTT	Dof	GRMZM2G009406
HORVU.MOREX.r3.5HG0424430.608	HvPUT1	TFmatrixID_0472	1028	-	tGCTTT	Dof	GRMZM2G009406
HORVU.MOREX.r3.5HG0424430.609	HvPUT1	TFmatrixID_0478	308	-	GCTTT	Dof	MNB1A_MAIZE
HORVU.MOREX.r3.5HG0424430.610	HvPUT1	TFmatrixID_0478	344	-	GCTTT	Dof	MNB1A_MAIZE
HORVU.MOREX.r3.5HG0424430.611	HvPUT1	TFmatrixID_0478	1029	-	GCTTT	Dof	MNB1A_MAIZE
HORVU.MOREX.r3.5HG0424430.612	HvPUT1	TFmatrixID_0480	308	-	GCTTT	Dof	GRMZM2G146283
HORVU.MOREX.r3.5HG0424430.613	HvPUT1	TFmatrixID_0480	344	-	GCTTT	Dof	GRMZM2G146283
HORVU.MOREX.r3.5HG0424430.614	HvPUT1	TFmatrixID_0480	1029	-	GCTTT	Dof	GRMZM2G146283
HORVU.MOREX.r3.5HG0424430.615	HvPUT1	TFmatrixID_0493	641	-	TTTCCgtatttgaaa	MADS box; MIKC; M-type;MIKC;M-type	AT4G22950;AT4G24540;AT5G13790;AT5G51860;AT5G51870;AT5G60910;AT5G62165;AT1G26310;AT2G14210;AT2G45650;AT3G30260;AT3G57230;AT3G57390;AT3G61120;AT4G09960;AT4G11880;BRADI1G08340;BRADI1G21980;BRADI1G32210;BRADI1G48520;BRADI1G59250;BRADI1G69890;BRADI1G77020;BRADI2G06330;BRADI2G25090;BRADI2G32910;BRADI2G57000;BRADI2G59120;BRADI3G00730;BRADI3G05260;BRADI3G32090;BRADI3G41260;BRADI3G51800;BRADI4G06867;BRADI…
HORVU.MOREX.r3.5HG0424430.616	HvPUT1	TFmatrixID_0497	58	-	aCACGTtacctccg	bHLH;bZIP; bHLH	AT2G20180;AT2G24260;AT2G46970;AT4G28790;AT4G28800;AT4G28811;AT4G28815;AT4G30980;AT5G58010;AT5G67110;BRADI1G06670;BRADI1G13980;BRADI1G47350;BRADI1G48400;BRADI1G58230;BRADI1G69190;BRADI2G11100;BRADI3G33170;BRADI3G54070;BRADI3G54640;BRADI4G30350;BRADI5G06620;BRADI5G21950;Glyma01g15930.1;Glyma01g39450.1;Glyma02g00980.1;Glyma02g45150.1;Glyma03g04000.1;Glyma03g32740.1;Glyma03g38390.1;Glyma03g38670.1;Gl…
HORVU.MOREX.r3.5HG0424430.617	HvPUT1	TFmatrixID_0498	565	+	ctTCGTAc	AP2	AT2G39250;AT3G54990;AT5G60120;Glyma02g09600.1;Glyma10g22390.1;Sb10g001490;GRMZM2G176175;GRMZM2G416701
HORVU.MOREX.r3.5HG0424430.618	HvPUT1	TFmatrixID_0500	638	-	tttTTTCCgtatttgaaaat	MADS box; MIKC; M-type;MIKC;M-type	AT4G22950;AT4G24540;AT4G37940;AT5G23260;AT5G51860;AT5G51870;AT5G62165;AT2G14210;AT2G22540;AT2G45650;AT3G57390;AT4G11880;BRADI1G35000;BRADI1G45807;BRADI1G72150;BRADI3G41260;BRADI3G46920;BRADI3G51800;BRADI3G57017;BRADI4G34680;BRADI5G12440;Glyma01g02530.1;Glyma01g02880.1;Glyma01g08130.1;Glyma02g04710.1;Glyma02g33040.1;Glyma02g38090.1;Glyma03g02210.1;Glyma05g03660.1;Glyma05g07350.1;Glyma05g28140.1;Gl…
HORVU.MOREX.r3.5HG0424430.619	HvPUT1	TFmatrixID_0503	1267	-	caaTTTCTatttcttcgaaac	MADS box; MIKC; M-type;MIKC;M-type	AT4G22950;AT5G10140;AT5G65050;AT5G65070;AT5G65080;AT1G77080;AT2G45650;AT3G57390;AT4G11880;BRADI1G21980;BRADI1G77020;BRADI3G32090;BRADI3G41260;BRADI3G51800;BRADI4G34680;Glyma01g08130.1;Glyma03g02210.1;Glyma05g03660.1;Glyma05g07350.1;Glyma05g28140.1;Glyma07g08820.1;Glyma07g08890.1;Glyma08g11110.1;Glyma08g11120.1;Glyma08g27670.1;Glyma09g40230.1;Glyma13g06730.1;Glyma18g45780.1;Glyma18g50900.1;Glyma19…
HORVU.MOREX.r3.5HG0424430.620	HvPUT1	TFmatrixID_0522	563	-	cgcttCGTACcgctga	SBP	AT1G69170;AT2G33810;AT2G42200;AT2G47070;AT3G57920;AT5G50570;AT5G50670;BRADI1G02760;BRADI1G26720;BRADI1G31390;BRADI2G59110;BRADI3G05720;BRADI3G40030;BRADI3G40240;BRADI4G33770;BRADI5G24670;Glyma01g08060.1;Glyma01g15020.1;Glyma02g01160.1;Glyma02g13370.1;Glyma02g30670.1;Glyma03g27180.1;Glyma05g00200.1;Glyma06g36140.1;Glyma07g14610.1;Glyma07g19770.1;Glyma07g31880.1;Glyma07g36180.1;Glyma09g09790.1;Glym…
HORVU.MOREX.r3.5HG0424430.621	HvPUT1	TFmatrixID_0522	1424	+	cttgctGTACGggctg	SBP	AT1G69170;AT2G33810;AT2G42200;AT2G47070;AT3G57920;AT5G50570;AT5G50670;BRADI1G02760;BRADI1G26720;BRADI1G31390;BRADI2G59110;BRADI3G05720;BRADI3G40030;BRADI3G40240;BRADI4G33770;BRADI5G24670;Glyma01g08060.1;Glyma01g15020.1;Glyma02g01160.1;Glyma02g13370.1;Glyma02g30670.1;Glyma03g27180.1;Glyma05g00200.1;Glyma06g36140.1;Glyma07g14610.1;Glyma07g19770.1;Glyma07g31880.1;Glyma07g36180.1;Glyma09g09790.1;Glym…
HORVU.MOREX.r3.5HG0424430.622	HvPUT1	TFmatrixID_0526	1172	-	aagtGCATGaa	B3	AT1G28300
HORVU.MOREX.r3.5HG0424430.623	HvPUT1	TFmatrixID_0527	969	-	gtgCAACAgtat	AP2; B3; RAV;ERF;RAV	AT1G13260;BRADI2G02710;BRADI2G47220;Glyma01g22260.1;Glyma02g11060.1;Glyma10g34760.1;Glyma20g32730.1;Os01g0140700;Os01g0141000;Os01g0693400;POPTR_0008s11600;POPTR_0010s13930;Sb03g031860;Sb09g027530;GRMZM2G059939;GRMZM2G159592;GRMZM2G169654
HORVU.MOREX.r3.5HG0424430.624	HvPUT1	TFmatrixID_0531	1423	+	ccttgctGTACGggctgca	SBP	AT1G20980;AT1G69170;AT2G42200;AT2G47070;AT3G57920;AT5G43270;BRADI1G02760;BRADI1G26720;BRADI1G31390;BRADI2G11240;BRADI2G59110;BRADI3G03510;BRADI3G05720;BRADI3G40240;BRADI3G41250;BRADI4G33770;BRADI4G34667;BRADI5G24670;Glyma01g08060.1;Glyma01g15020.1;Glyma02g01160.1;Glyma02g13370.1;Glyma02g30670.1;Glyma03g27180.1;Glyma04g37390.1;Glyma05g00200.1;Glyma05g38180.1;Glyma06g17700.1;Glyma06g22450.1;Glyma06…
HORVU.MOREX.r3.5HG0424430.625	HvPUT1	TFmatrixID_0534	1062	-	TTGACcgaatg	WRKY	AT1G13960;AT2G03340;AT2G04880;AT2G37260;AT3G01080;AT4G12020;AT4G26440;AT4G26640;AT4G30935;AT5G07100;BRADI1G02327;BRADI1G07970;BRADI1G16120;BRADI1G22680;BRADI1G23340;BRADI1G47690;BRADI2G00280;BRADI2G22440;BRADI2G53760;BRADI3G19640;BRADI3G39340;BRADI4G01950;BRADI4G06690;BRADI4G09890;BRADI4G33370;BRADI4G45290;BRADI5G13090;Glyma01g06550.1;Glyma01g31920.1;Glyma02g12490.1;Glyma02g36510.1;Glyma02g39870.…
HORVU.MOREX.r3.5HG0424430.626	HvPUT1	TFmatrixID_0545	21	-	gctggCGTGGtc	bZIP	AT1G75390;POPTR_0004s16560;POPTR_0005s25290
HORVU.MOREX.r3.5HG0424430.627	HvPUT1	TFmatrixID_0546	56	+	atACACGttacc	bZIP	AT1G75390;POPTR_0004s16560;POPTR_0005s25290
HORVU.MOREX.r3.5HG0424430.628	HvPUT1	TFmatrixID_0549	306	-	ttGCTTTttct	Dof	GRMZM2G009406
HORVU.MOREX.r3.5HG0424430.629	HvPUT1	TFmatrixID_0549	1027	-	gtGCTTTttct	Dof	GRMZM2G009406
HORVU.MOREX.r3.5HG0424430.630	HvPUT1	TFmatrixID_0558	53	+	aagataCACGTtacctcc	bHLH;bZIP; bHLH	AT1G09530;AT2G24260;AT2G46970;AT4G28790;AT4G28800;AT4G28811;AT4G28815;AT4G30980;AT5G58010;AT5G61270;AT5G67110;BRADI1G06670;BRADI1G13980;BRADI1G47350;BRADI1G48400;BRADI1G58230;BRADI2G11100;BRADI3G33170;BRADI3G54070;BRADI3G54640;BRADI5G21950;Glyma01g15930.1;Glyma01g39450.1;Glyma02g00980.1;Glyma02g45150.1;Glyma03g04000.1;Glyma03g32740.1;Glyma03g38390.1;Glyma03g38670.1;Glyma08g41620.1;Glyma09g14380.1…
HORVU.MOREX.r3.5HG0424430.631	HvPUT1	TFmatrixID_0560	969	-	gtgCAACAgtat	AP2; B3; RAV;ERF;RAV	AT1G13260;BRADI2G02710;BRADI2G47220;Glyma01g22260.1;Glyma02g11060.1;Glyma10g34760.1;Glyma20g32730.1;Os01g0140700;Os01g0141000;Os01g0693400;POPTR_0008s11600;POPTR_0010s13930;Sb03g031860;Sb09g027530;GRMZM2G059939;GRMZM2G159592;GRMZM2G169654
HORVU.MOREX.r3.5HG0424430.632	HvPUT1	TFmatrixID_0569	453	+	ctATAAAcgacccaa	TBP	AT1G55520;AT3G13445;BRADI1G13220;BRADI3G27190;BRADI4G01150;Glyma03g04500.1;Glyma09g41330.1;Glyma16g25450.1;Glyma18g44460.1;Glyma19g28780.1;Os10g0432300;Os12g0580300;POPTR_0013s05580;POPTR_0019s04890;Sb01g012880;Sb01g017130;Sb01g021297;Sb08g022273;GRMZM2G149238;GRMZM2G161418
HORVU.MOREX.r3.5HG0424430.633	HvPUT1	TFmatrixID_0569	764	+	ctATAAAaccgaaaa	TBP	AT1G55520;AT3G13445;BRADI1G13220;BRADI3G27190;BRADI4G01150;Glyma03g04500.1;Glyma09g41330.1;Glyma16g25450.1;Glyma18g44460.1;Glyma19g28780.1;Os10g0432300;Os12g0580300;POPTR_0013s05580;POPTR_0019s04890;Sb01g012880;Sb01g017130;Sb01g021297;Sb08g022273;GRMZM2G149238;GRMZM2G161418
HORVU.MOREX.r3.5HG0424430.634	HvPUT1	TFmatrixID_0570	763	+	actaTAAAAc	TBP	AT1G55520;AT3G13445;BRADI1G13220;BRADI3G27190;BRADI4G01150;Glyma03g04500.1;Glyma09g41330.1;Glyma16g25450.1;Glyma18g44460.1;Glyma19g28780.1;Os10g0432300;Os12g0580300;POPTR_0013s05580;POPTR_0019s04890;Sb01g012880;Sb01g017130;Sb01g021297;Sb08g022273;GRMZM2G149238;GRMZM2G161418
HORVU.MOREX.r3.5HG0424430.635	HvPUT1	TFmatrixID_0571	717	-	taTTTATt	TBP	AT1G55520;AT3G13445;BRADI1G13220;BRADI3G27190;BRADI4G01150;Glyma03g04500.1;Glyma09g41330.1;Glyma16g25450.1;Glyma18g44460.1;Glyma19g28780.1;Os10g0432300;Os12g0580300;POPTR_0013s05580;POPTR_0019s04890;Sb01g012880;Sb01g017130;Sb01g021297;Sb08g022273;GRMZM2G149238;GRMZM2G161418
HORVU.MOREX.r3.5HG0424430.636	HvPUT1	TFmatrixID_0580	653	+	aAAATAt	AT-Hook	Os01g0835600;Sb0621s002020;GRMZM2G008456;GRMZM2G127034
HORVU.MOREX.r3.5HG0424430.637	HvPUT1	TFmatrixID_0585	763	+	actATAAAacc	TBP	AT1G55520;AT3G13445;BRADI1G13220;BRADI3G27190;BRADI4G01150;Glyma03g04500.1;Glyma09g41330.1;Glyma16g25450.1;Glyma18g44460.1;Glyma19g28780.1;Os10g0432300;Os12g0580300;POPTR_0013s05580;POPTR_0019s04890;Sb01g012880;Sb01g017130;Sb01g021297;Sb08g022273;GRMZM2G149238;GRMZM2G161418
HORVU.MOREX.r3.5HG0424430.638	HvPUT1	TFmatrixID_0589	829	-	tggTGGTTtg	MYB	AT5G12870
HORVU.MOREX.r3.5HG0424430.639	HvPUT1	TFmatrixID_0611	566	+	ttCGTACcgc	SBP	AT2G47070
HORVU.MOREX.r3.5HG0424430.640	HvPUT1	TFmatrixID_0611	1427	-	gctGTACGgg	SBP	AT2G47070
HORVU.MOREX.r3.5HG0424430.641	HvPUT1	TFmatrixID_0612	1428	+	ctGTACGggc	SBP	AT2G47070
HORVU.MOREX.r3.5HG0424430.642	HvPUT1	TFmatrixID_0616	583	+	gggcCCCACg	TCP	AT1G69690
HORVU.MOREX.r3.5HG0424430.643	HvPUT1	TFmatrixID_0618	583	+	gggcCCCACg	TCP	AT1G35560
HORVU.MOREX.r3.5HG0424430.644	HvPUT1	TFmatrixID_0621	564	+	gctTCGTAcc	AP2	AT2G28550
HORVU.MOREX.r3.5HG0424430.645	HvPUT1	TFmatrixID_0623	860	-	ttTAAGGttg	AP2	AT2G28550
HORVU.MOREX.r3.5HG0424430.646	HvPUT1	TFmatrixID_0623	1087	-	atTAAGGttt	AP2	AT2G28550
HORVU.MOREX.r3.5HG0424430.647	HvPUT1	TFmatrixID_0624	564	+	gctTCGTAcc	AP2	AT5G60120
HORVU.MOREX.r3.5HG0424430.648	HvPUT1	TFmatrixID_0626	860	-	ttTAAGGttg	AP2	AT5G60120
HORVU.MOREX.r3.5HG0424430.649	HvPUT1	TFmatrixID_0626	1087	-	atTAAGGttt	AP2	AT5G60120
HORVU.MOREX.r3.5HG0424430.650	HvPUT1	TFmatrixID_0628	1039	+	ctTAATTatg	Homeodomain; bZIP; HD-ZIP; WOX	AT4G35550
HORVU.MOREX.r3.5HG0424430.651	HvPUT1	TFmatrixID_0628	1039	-	cttAATTAtg	Homeodomain; bZIP; HD-ZIP; WOX	AT4G35550
HORVU.MOREX.r3.5HG0424430.652	HvPUT1	TFmatrixID_0630	1060	-	gcTTGACcga	WRKY	AT4G31800
HORVU.MOREX.r3.5HG0424430.653	HvPUT1	TFmatrixID_0633	1103	-	cttATGATta	YABBY	AT2G45190
HORVU.MOREX.r3.5HG0424430.654	HvPUT1	TFmatrixID_0633	1222	-	attATGATta	YABBY	AT2G45190
HORVU.MOREX.r3.5HG0424430.655	HvPUT1	TFmatrixID_0634	1104	+	ttATGATtat	Sox; YABBY	AT2G26580
HORVU.MOREX.r3.5HG0424430.656	HvPUT1	TFmatrixID_0634	1223	+	ttATGATtaa	Sox; YABBY	AT2G26580
HORVU.MOREX.r3.5HG0424430.657	HvPUT1	TFmatrixID_0634	1255	+	aaATGATtat	Sox; YABBY	AT2G26580
HORVU.MOREX.r3.5HG0424430.658	HvPUT1	TFmatrixID_0634	1322	-	ttaATCATat	Sox; YABBY	AT2G26580
HORVU.MOREX.r3.5HG0424430.659	HvPUT1	TFmatrixID_0638	1110	-	ttaTCTTTtt	Dof	AT5G65590
HORVU.MOREX.r3.5HG0424430.660	HvPUT1	TFmatrixID_0639	59	+	caCGTTAcct	Dof	AT5G65590
HORVU.MOREX.r3.5HG0424430.661	HvPUT1	TFmatrixID_0640	701	+	caGTGCAttt	C2H2	AT5G03510
HORVU.MOREX.r3.5HG0424430.662	HvPUT1	TFmatrixID_0642	1094	+	ttTCTAGaac	HSF	AT5G62020
HORVU.MOREX.r3.5HG0424430.663	HvPUT1	TFmatrixID_0642	1094	-	tttCTAGAac	HSF	AT5G62020
HORVU.MOREX.r3.5HG0424430.664	HvPUT1	TF_motif_seq_0014	471	+	ATGACctgat	bZIP	AT5G06950
HORVU.MOREX.r3.5HG0424430.665	HvPUT1	TF_motif_seq_0019	588	+	CCACGagtca	bZIP	AT3G54620;AT4G02640
HORVU.MOREX.r3.5HG0424430.666	HvPUT1	TF_motif_seq_0082	1157	+	TACACttatat	bZIP	AT5G06960;AT5G10030
HORVU.MOREX.r3.5HG0424430.667	HvPUT1	TF_motif_seq_0088	250	-	gggcggCAGCA	bZIP	AT4G02640
HORVU.MOREX.r3.5HG0424430.668	HvPUT1	TF_motif_seq_0131	728	+	CACATttccgcagg	AP2	AT4G37750
HORVU.MOREX.r3.5HG0424430.669	HvPUT1	TF_motif_seq_0169	1270	+	TTTCTatttcttcgaa	(Others)	U81368;U81369;U81370
HORVU.MOREX.r3.5HG0424430.670	HvPUT1	TF_motif_seq_0175	1071	-	tgaattatagaatGATAT	(Others)	X52153
HORVU.MOREX.r3.5HG0424430.671	HvPUT1	TF_motif_seq_0237	33	+	CGATA	GATA; tify	AT1G51600;AT2G45050;AT3G06740;AT3G16870;AT3G21175;AT3G24050;AT3G54810;AT3G60530;AT4G17570;AT4G24470;AT4G26150;AT4G32890;AT4G34680;AT5G25830;AT5G26930;AT5G56860;AT5G66320;AT2G18380;AT3G50870;AT4G36620
HORVU.MOREX.r3.5HG0424430.672	HvPUT1	TF_motif_seq_0237	37	+	AGATG	GATA; tify	AT1G51600;AT2G45050;AT3G06740;AT3G16870;AT3G21175;AT3G24050;AT3G54810;AT3G60530;AT4G17570;AT4G24470;AT4G26150;AT4G32890;AT4G34680;AT5G25830;AT5G26930;AT5G56860;AT5G66320;AT2G18380;AT3G50870;AT4G36620
HORVU.MOREX.r3.5HG0424430.673	HvPUT1	TF_motif_seq_0237	44	+	CGATC	GATA; tify	AT1G51600;AT2G45050;AT3G06740;AT3G16870;AT3G21175;AT3G24050;AT3G54810;AT3G60530;AT4G17570;AT4G24470;AT4G26150;AT4G32890;AT4G34680;AT5G25830;AT5G26930;AT5G56860;AT5G66320;AT2G18380;AT3G50870;AT4G36620
HORVU.MOREX.r3.5HG0424430.674	HvPUT1	TF_motif_seq_0237	45	-	GATCA	GATA; tify	AT1G51600;AT2G45050;AT3G06740;AT3G16870;AT3G21175;AT3G24050;AT3G54810;AT3G60530;AT4G17570;AT4G24470;AT4G26150;AT4G32890;AT4G34680;AT5G25830;AT5G26930;AT5G56860;AT5G66320;AT2G18380;AT3G50870;AT4G36620
HORVU.MOREX.r3.5HG0424430.675	HvPUT1	TF_motif_seq_0237	54	+	AGATA	GATA; tify	AT1G51600;AT2G45050;AT3G06740;AT3G16870;AT3G21175;AT3G24050;AT3G54810;AT3G60530;AT4G17570;AT4G24470;AT4G26150;AT4G32890;AT4G34680;AT5G25830;AT5G26930;AT5G56860;AT5G66320;AT2G18380;AT3G50870;AT4G36620
HORVU.MOREX.r3.5HG0424430.676	HvPUT1	TF_motif_seq_0237	88	-	CATCC	GATA; tify	AT1G51600;AT2G45050;AT3G06740;AT3G16870;AT3G21175;AT3G24050;AT3G54810;AT3G60530;AT4G17570;AT4G24470;AT4G26150;AT4G32890;AT4G34680;AT5G25830;AT5G26930;AT5G56860;AT5G66320;AT2G18380;AT3G50870;AT4G36620
HORVU.MOREX.r3.5HG0424430.677	HvPUT1	TF_motif_seq_0237	109	-	CATCG	GATA; tify	AT1G51600;AT2G45050;AT3G06740;AT3G16870;AT3G21175;AT3G24050;AT3G54810;AT3G60530;AT4G17570;AT4G24470;AT4G26150;AT4G32890;AT4G34680;AT5G25830;AT5G26930;AT5G56860;AT5G66320;AT2G18380;AT3G50870;AT4G36620
HORVU.MOREX.r3.5HG0424430.678	HvPUT1	TF_motif_seq_0237	162	+	GGATG	GATA; tify	AT1G51600;AT2G45050;AT3G06740;AT3G16870;AT3G21175;AT3G24050;AT3G54810;AT3G60530;AT4G17570;AT4G24470;AT4G26150;AT4G32890;AT4G34680;AT5G25830;AT5G26930;AT5G56860;AT5G66320;AT2G18380;AT3G50870;AT4G36620
HORVU.MOREX.r3.5HG0424430.679	HvPUT1	TF_motif_seq_0237	183	+	CGATT	GATA; tify	AT1G51600;AT2G45050;AT3G06740;AT3G16870;AT3G21175;AT3G24050;AT3G54810;AT3G60530;AT4G17570;AT4G24470;AT4G26150;AT4G32890;AT4G34680;AT5G25830;AT5G26930;AT5G56860;AT5G66320;AT2G18380;AT3G50870;AT4G36620
HORVU.MOREX.r3.5HG0424430.680	HvPUT1	TF_motif_seq_0237	192	+	GGATA	GATA; tify	AT1G51600;AT2G45050;AT3G06740;AT3G16870;AT3G21175;AT3G24050;AT3G54810;AT3G60530;AT4G17570;AT4G24470;AT4G26150;AT4G32890;AT4G34680;AT5G25830;AT5G26930;AT5G56860;AT5G66320;AT2G18380;AT3G50870;AT4G36620
HORVU.MOREX.r3.5HG0424430.681	HvPUT1	TF_motif_seq_0237	221	+	GGATC	GATA; tify	AT1G51600;AT2G45050;AT3G06740;AT3G16870;AT3G21175;AT3G24050;AT3G54810;AT3G60530;AT4G17570;AT4G24470;AT4G26150;AT4G32890;AT4G34680;AT5G25830;AT5G26930;AT5G56860;AT5G66320;AT2G18380;AT3G50870;AT4G36620
HORVU.MOREX.r3.5HG0424430.682	HvPUT1	TF_motif_seq_0237	222	-	GATCA	GATA; tify	AT1G51600;AT2G45050;AT3G06740;AT3G16870;AT3G21175;AT3G24050;AT3G54810;AT3G60530;AT4G17570;AT4G24470;AT4G26150;AT4G32890;AT4G34680;AT5G25830;AT5G26930;AT5G56860;AT5G66320;AT2G18380;AT3G50870;AT4G36620
HORVU.MOREX.r3.5HG0424430.683	HvPUT1	TF_motif_seq_0237	261	-	CATCG	GATA; tify	AT1G51600;AT2G45050;AT3G06740;AT3G16870;AT3G21175;AT3G24050;AT3G54810;AT3G60530;AT4G17570;AT4G24470;AT4G26150;AT4G32890;AT4G34680;AT5G25830;AT5G26930;AT5G56860;AT5G66320;AT2G18380;AT3G50870;AT4G36620
HORVU.MOREX.r3.5HG0424430.684	HvPUT1	TF_motif_seq_0237	275	+	AGATC	GATA; tify	AT1G51600;AT2G45050;AT3G06740;AT3G16870;AT3G21175;AT3G24050;AT3G54810;AT3G60530;AT4G17570;AT4G24470;AT4G26150;AT4G32890;AT4G34680;AT5G25830;AT5G26930;AT5G56860;AT5G66320;AT2G18380;AT3G50870;AT4G36620
HORVU.MOREX.r3.5HG0424430.685	HvPUT1	TF_motif_seq_0237	276	-	GATCG	GATA; tify	AT1G51600;AT2G45050;AT3G06740;AT3G16870;AT3G21175;AT3G24050;AT3G54810;AT3G60530;AT4G17570;AT4G24470;AT4G26150;AT4G32890;AT4G34680;AT5G25830;AT5G26930;AT5G56860;AT5G66320;AT2G18380;AT3G50870;AT4G36620
HORVU.MOREX.r3.5HG0424430.686	HvPUT1	TF_motif_seq_0237	328	+	CGATC	GATA; tify	AT1G51600;AT2G45050;AT3G06740;AT3G16870;AT3G21175;AT3G24050;AT3G54810;AT3G60530;AT4G17570;AT4G24470;AT4G26150;AT4G32890;AT4G34680;AT5G25830;AT5G26930;AT5G56860;AT5G66320;AT2G18380;AT3G50870;AT4G36620
HORVU.MOREX.r3.5HG0424430.687	HvPUT1	TF_motif_seq_0237	329	-	GATCG	GATA; tify	AT1G51600;AT2G45050;AT3G06740;AT3G16870;AT3G21175;AT3G24050;AT3G54810;AT3G60530;AT4G17570;AT4G24470;AT4G26150;AT4G32890;AT4G34680;AT5G25830;AT5G26930;AT5G56860;AT5G66320;AT2G18380;AT3G50870;AT4G36620
HORVU.MOREX.r3.5HG0424430.688	HvPUT1	TF_motif_seq_0237	425	+	AGATC	GATA; tify	AT1G51600;AT2G45050;AT3G06740;AT3G16870;AT3G21175;AT3G24050;AT3G54810;AT3G60530;AT4G17570;AT4G24470;AT4G26150;AT4G32890;AT4G34680;AT5G25830;AT5G26930;AT5G56860;AT5G66320;AT2G18380;AT3G50870;AT4G36620
HORVU.MOREX.r3.5HG0424430.689	HvPUT1	TF_motif_seq_0237	426	-	GATCA	GATA; tify	AT1G51600;AT2G45050;AT3G06740;AT3G16870;AT3G21175;AT3G24050;AT3G54810;AT3G60530;AT4G17570;AT4G24470;AT4G26150;AT4G32890;AT4G34680;AT5G25830;AT5G26930;AT5G56860;AT5G66320;AT2G18380;AT3G50870;AT4G36620
HORVU.MOREX.r3.5HG0424430.690	HvPUT1	TF_motif_seq_0237	469	+	CGATG	GATA; tify	AT1G51600;AT2G45050;AT3G06740;AT3G16870;AT3G21175;AT3G24050;AT3G54810;AT3G60530;AT4G17570;AT4G24470;AT4G26150;AT4G32890;AT4G34680;AT5G25830;AT5G26930;AT5G56860;AT5G66320;AT2G18380;AT3G50870;AT4G36620
HORVU.MOREX.r3.5HG0424430.691	HvPUT1	TF_motif_seq_0237	477	+	TGATA	GATA; tify	AT1G51600;AT2G45050;AT3G06740;AT3G16870;AT3G21175;AT3G24050;AT3G54810;AT3G60530;AT4G17570;AT4G24470;AT4G26150;AT4G32890;AT4G34680;AT5G25830;AT5G26930;AT5G56860;AT5G66320;AT2G18380;AT3G50870;AT4G36620
HORVU.MOREX.r3.5HG0424430.692	HvPUT1	TF_motif_seq_0237	487	-	AATCT	GATA; tify	AT1G51600;AT2G45050;AT3G06740;AT3G16870;AT3G21175;AT3G24050;AT3G54810;AT3G60530;AT4G17570;AT4G24470;AT4G26150;AT4G32890;AT4G34680;AT5G25830;AT5G26930;AT5G56860;AT5G66320;AT2G18380;AT3G50870;AT4G36620
HORVU.MOREX.r3.5HG0424430.693	HvPUT1	TF_motif_seq_0237	512	+	CGATT	GATA; tify	AT1G51600;AT2G45050;AT3G06740;AT3G16870;AT3G21175;AT3G24050;AT3G54810;AT3G60530;AT4G17570;AT4G24470;AT4G26150;AT4G32890;AT4G34680;AT5G25830;AT5G26930;AT5G56860;AT5G66320;AT2G18380;AT3G50870;AT4G36620
HORVU.MOREX.r3.5HG0424430.694	HvPUT1	TF_motif_seq_0237	598	+	CGATA	GATA; tify	AT1G51600;AT2G45050;AT3G06740;AT3G16870;AT3G21175;AT3G24050;AT3G54810;AT3G60530;AT4G17570;AT4G24470;AT4G26150;AT4G32890;AT4G34680;AT5G25830;AT5G26930;AT5G56860;AT5G66320;AT2G18380;AT3G50870;AT4G36620
HORVU.MOREX.r3.5HG0424430.695	HvPUT1	TF_motif_seq_0237	615	+	TGATT	GATA; tify	AT1G51600;AT2G45050;AT3G06740;AT3G16870;AT3G21175;AT3G24050;AT3G54810;AT3G60530;AT4G17570;AT4G24470;AT4G26150;AT4G32890;AT4G34680;AT5G25830;AT5G26930;AT5G56860;AT5G66320;AT2G18380;AT3G50870;AT4G36620
HORVU.MOREX.r3.5HG0424430.696	HvPUT1	TF_motif_seq_0237	664	-	CATCA	GATA; tify	AT1G51600;AT2G45050;AT3G06740;AT3G16870;AT3G21175;AT3G24050;AT3G54810;AT3G60530;AT4G17570;AT4G24470;AT4G26150;AT4G32890;AT4G34680;AT5G25830;AT5G26930;AT5G56860;AT5G66320;AT2G18380;AT3G50870;AT4G36620
HORVU.MOREX.r3.5HG0424430.697	HvPUT1	TF_motif_seq_0237	676	-	CATCC	GATA; tify	AT1G51600;AT2G45050;AT3G06740;AT3G16870;AT3G21175;AT3G24050;AT3G54810;AT3G60530;AT4G17570;AT4G24470;AT4G26150;AT4G32890;AT4G34680;AT5G25830;AT5G26930;AT5G56860;AT5G66320;AT2G18380;AT3G50870;AT4G36620
HORVU.MOREX.r3.5HG0424430.698	HvPUT1	TF_motif_seq_0237	698	-	CATCA	GATA; tify	AT1G51600;AT2G45050;AT3G06740;AT3G16870;AT3G21175;AT3G24050;AT3G54810;AT3G60530;AT4G17570;AT4G24470;AT4G26150;AT4G32890;AT4G34680;AT5G25830;AT5G26930;AT5G56860;AT5G66320;AT2G18380;AT3G50870;AT4G36620
HORVU.MOREX.r3.5HG0424430.699	HvPUT1	TF_motif_seq_0237	812	+	CGATT	GATA; tify	AT1G51600;AT2G45050;AT3G06740;AT3G16870;AT3G21175;AT3G24050;AT3G54810;AT3G60530;AT4G17570;AT4G24470;AT4G26150;AT4G32890;AT4G34680;AT5G25830;AT5G26930;AT5G56860;AT5G66320;AT2G18380;AT3G50870;AT4G36620
HORVU.MOREX.r3.5HG0424430.700	HvPUT1	TF_motif_seq_0237	872	+	CGATG	GATA; tify	AT1G51600;AT2G45050;AT3G06740;AT3G16870;AT3G21175;AT3G24050;AT3G54810;AT3G60530;AT4G17570;AT4G24470;AT4G26150;AT4G32890;AT4G34680;AT5G25830;AT5G26930;AT5G56860;AT5G66320;AT2G18380;AT3G50870;AT4G36620
HORVU.MOREX.r3.5HG0424430.701	HvPUT1	TF_motif_seq_0237	938	+	GGATA	GATA; tify	AT1G51600;AT2G45050;AT3G06740;AT3G16870;AT3G21175;AT3G24050;AT3G54810;AT3G60530;AT4G17570;AT4G24470;AT4G26150;AT4G32890;AT4G34680;AT5G25830;AT5G26930;AT5G56860;AT5G66320;AT2G18380;AT3G50870;AT4G36620
HORVU.MOREX.r3.5HG0424430.702	HvPUT1	TF_motif_seq_0237	986	-	CATCA	GATA; tify	AT1G51600;AT2G45050;AT3G06740;AT3G16870;AT3G21175;AT3G24050;AT3G54810;AT3G60530;AT4G17570;AT4G24470;AT4G26150;AT4G32890;AT4G34680;AT5G25830;AT5G26930;AT5G56860;AT5G66320;AT2G18380;AT3G50870;AT4G36620
HORVU.MOREX.r3.5HG0424430.703	HvPUT1	TF_motif_seq_0237	1083	+	TGATA	GATA; tify	AT1G51600;AT2G45050;AT3G06740;AT3G16870;AT3G21175;AT3G24050;AT3G54810;AT3G60530;AT4G17570;AT4G24470;AT4G26150;AT4G32890;AT4G34680;AT5G25830;AT5G26930;AT5G56860;AT5G66320;AT2G18380;AT3G50870;AT4G36620
HORVU.MOREX.r3.5HG0424430.704	HvPUT1	TF_motif_seq_0237	1107	+	TGATT	GATA; tify	AT1G51600;AT2G45050;AT3G06740;AT3G16870;AT3G21175;AT3G24050;AT3G54810;AT3G60530;AT4G17570;AT4G24470;AT4G26150;AT4G32890;AT4G34680;AT5G25830;AT5G26930;AT5G56860;AT5G66320;AT2G18380;AT3G50870;AT4G36620
HORVU.MOREX.r3.5HG0424430.705	HvPUT1	TF_motif_seq_0237	1111	-	TATCT	GATA; tify	AT1G51600;AT2G45050;AT3G06740;AT3G16870;AT3G21175;AT3G24050;AT3G54810;AT3G60530;AT4G17570;AT4G24470;AT4G26150;AT4G32890;AT4G34680;AT5G25830;AT5G26930;AT5G56860;AT5G66320;AT2G18380;AT3G50870;AT4G36620
HORVU.MOREX.r3.5HG0424430.706	HvPUT1	TF_motif_seq_0237	1131	-	AATCC	GATA; tify	AT1G51600;AT2G45050;AT3G06740;AT3G16870;AT3G21175;AT3G24050;AT3G54810;AT3G60530;AT4G17570;AT4G24470;AT4G26150;AT4G32890;AT4G34680;AT5G25830;AT5G26930;AT5G56860;AT5G66320;AT2G18380;AT3G50870;AT4G36620
HORVU.MOREX.r3.5HG0424430.707	HvPUT1	TF_motif_seq_0237	1216	+	TGATA	GATA; tify	AT1G51600;AT2G45050;AT3G06740;AT3G16870;AT3G21175;AT3G24050;AT3G54810;AT3G60530;AT4G17570;AT4G24470;AT4G26150;AT4G32890;AT4G34680;AT5G25830;AT5G26930;AT5G56860;AT5G66320;AT2G18380;AT3G50870;AT4G36620
HORVU.MOREX.r3.5HG0424430.708	HvPUT1	TF_motif_seq_0237	1226	+	TGATT	GATA; tify	AT1G51600;AT2G45050;AT3G06740;AT3G16870;AT3G21175;AT3G24050;AT3G54810;AT3G60530;AT4G17570;AT4G24470;AT4G26150;AT4G32890;AT4G34680;AT5G25830;AT5G26930;AT5G56860;AT5G66320;AT2G18380;AT3G50870;AT4G36620
HORVU.MOREX.r3.5HG0424430.709	HvPUT1	TF_motif_seq_0237	1258	+	TGATT	GATA; tify	AT1G51600;AT2G45050;AT3G06740;AT3G16870;AT3G21175;AT3G24050;AT3G54810;AT3G60530;AT4G17570;AT4G24470;AT4G26150;AT4G32890;AT4G34680;AT5G25830;AT5G26930;AT5G56860;AT5G66320;AT2G18380;AT3G50870;AT4G36620
HORVU.MOREX.r3.5HG0424430.710	HvPUT1	TF_motif_seq_0237	1324	-	AATCA	GATA; tify	AT1G51600;AT2G45050;AT3G06740;AT3G16870;AT3G21175;AT3G24050;AT3G54810;AT3G60530;AT4G17570;AT4G24470;AT4G26150;AT4G32890;AT4G34680;AT5G25830;AT5G26930;AT5G56860;AT5G66320;AT2G18380;AT3G50870;AT4G36620
HORVU.MOREX.r3.5HG0424430.711	HvPUT1	TF_motif_seq_0237	1375	-	AATCT	GATA; tify	AT1G51600;AT2G45050;AT3G06740;AT3G16870;AT3G21175;AT3G24050;AT3G54810;AT3G60530;AT4G17570;AT4G24470;AT4G26150;AT4G32890;AT4G34680;AT5G25830;AT5G26930;AT5G56860;AT5G66320;AT2G18380;AT3G50870;AT4G36620
HORVU.MOREX.r3.5HG0424430.712	HvPUT1	TF_motif_seq_0237	1411	-	AATCC	GATA; tify	AT1G51600;AT2G45050;AT3G06740;AT3G16870;AT3G21175;AT3G24050;AT3G54810;AT3G60530;AT4G17570;AT4G24470;AT4G26150;AT4G32890;AT4G34680;AT5G25830;AT5G26930;AT5G56860;AT5G66320;AT2G18380;AT3G50870;AT4G36620
HORVU.MOREX.r3.5HG0424430.713	HvPUT1	TF_motif_seq_0237	1472	-	AATCT	GATA; tify	AT1G51600;AT2G45050;AT3G06740;AT3G16870;AT3G21175;AT3G24050;AT3G54810;AT3G60530;AT4G17570;AT4G24470;AT4G26150;AT4G32890;AT4G34680;AT5G25830;AT5G26930;AT5G56860;AT5G66320;AT2G18380;AT3G50870;AT4G36620
HORVU.MOREX.r3.5HG0424430.714	HvPUT1	TF_motif_seq_0237	1492	+	GGATC	GATA; tify	AT1G51600;AT2G45050;AT3G06740;AT3G16870;AT3G21175;AT3G24050;AT3G54810;AT3G60530;AT4G17570;AT4G24470;AT4G26150;AT4G32890;AT4G34680;AT5G25830;AT5G26930;AT5G56860;AT5G66320;AT2G18380;AT3G50870;AT4G36620
HORVU.MOREX.r3.5HG0424430.715	HvPUT1	TF_motif_seq_0237	1493	-	GATCC	GATA; tify	AT1G51600;AT2G45050;AT3G06740;AT3G16870;AT3G21175;AT3G24050;AT3G54810;AT3G60530;AT4G17570;AT4G24470;AT4G26150;AT4G32890;AT4G34680;AT5G25830;AT5G26930;AT5G56860;AT5G66320;AT2G18380;AT3G50870;AT4G36620
HORVU.MOREX.r3.5HG0424430.716	HvPUT1	TF_motif_seq_0239	11	+	AAGGA	Dof	AT1G29160;AT1G64620;AT2G37590;AT3G21270;AT3G45610;AT3G47500;AT4G38000;AT5G39660;AT5G60200;AT5G60850;AT5G62940;AT2G46590;AT1G07640;AT1G21340;AT1G26790;AT1G47655;AT1G51700;AT1G69570;AT2G28510;AT2G28810;AT2G34140;AT3G50410;AT3G55370;AT3G61850;AT4G00940;AT4G21050;AT4G21080;AT4G24060;AT5G02460;AT5G62430;AT5G65590;AT5G66940
HORVU.MOREX.r3.5HG0424430.717	HvPUT1	TF_motif_seq_0239	230	+	AAAGT	Dof	AT1G29160;AT1G64620;AT2G37590;AT3G21270;AT3G45610;AT3G47500;AT4G38000;AT5G39660;AT5G60200;AT5G60850;AT5G62940;AT2G46590;AT1G07640;AT1G21340;AT1G26790;AT1G47655;AT1G51700;AT1G69570;AT2G28510;AT2G28810;AT2G34140;AT3G50410;AT3G55370;AT3G61850;AT4G00940;AT4G21050;AT4G21080;AT4G24060;AT5G02460;AT5G62430;AT5G65590;AT5G66940
HORVU.MOREX.r3.5HG0424430.718	HvPUT1	TF_motif_seq_0239	296	+	AAGGA	Dof	AT1G29160;AT1G64620;AT2G37590;AT3G21270;AT3G45610;AT3G47500;AT4G38000;AT5G39660;AT5G60200;AT5G60850;AT5G62940;AT2G46590;AT1G07640;AT1G21340;AT1G26790;AT1G47655;AT1G51700;AT1G69570;AT2G28510;AT2G28810;AT2G34140;AT3G50410;AT3G55370;AT3G61850;AT4G00940;AT4G21050;AT4G21080;AT4G24060;AT5G02460;AT5G62430;AT5G65590;AT5G66940
HORVU.MOREX.r3.5HG0424430.719	HvPUT1	TF_motif_seq_0239	300	+	AAGGG	Dof	AT1G29160;AT1G64620;AT2G37590;AT3G21270;AT3G45610;AT3G47500;AT4G38000;AT5G39660;AT5G60200;AT5G60850;AT5G62940;AT2G46590;AT1G07640;AT1G21340;AT1G26790;AT1G47655;AT1G51700;AT1G69570;AT2G28510;AT2G28810;AT2G34140;AT3G50410;AT3G55370;AT3G61850;AT4G00940;AT4G21050;AT4G21080;AT4G24060;AT5G02460;AT5G62430;AT5G65590;AT5G66940
HORVU.MOREX.r3.5HG0424430.720	HvPUT1	TF_motif_seq_0239	308	-	GCTTT	Dof	AT1G29160;AT1G64620;AT2G37590;AT3G21270;AT3G45610;AT3G47500;AT4G38000;AT5G39660;AT5G60200;AT5G60850;AT5G62940;AT2G46590;AT1G07640;AT1G21340;AT1G26790;AT1G47655;AT1G51700;AT1G69570;AT2G28510;AT2G28810;AT2G34140;AT3G50410;AT3G55370;AT3G61850;AT4G00940;AT4G21050;AT4G21080;AT4G24060;AT5G02460;AT5G62430;AT5G65590;AT5G66940
HORVU.MOREX.r3.5HG0424430.721	HvPUT1	TF_motif_seq_0239	314	-	TCTTT	Dof	AT1G29160;AT1G64620;AT2G37590;AT3G21270;AT3G45610;AT3G47500;AT4G38000;AT5G39660;AT5G60200;AT5G60850;AT5G62940;AT2G46590;AT1G07640;AT1G21340;AT1G26790;AT1G47655;AT1G51700;AT1G69570;AT2G28510;AT2G28810;AT2G34140;AT3G50410;AT3G55370;AT3G61850;AT4G00940;AT4G21050;AT4G21080;AT4G24060;AT5G02460;AT5G62430;AT5G65590;AT5G66940
HORVU.MOREX.r3.5HG0424430.722	HvPUT1	TF_motif_seq_0239	344	-	GCTTT	Dof	AT1G29160;AT1G64620;AT2G37590;AT3G21270;AT3G45610;AT3G47500;AT4G38000;AT5G39660;AT5G60200;AT5G60850;AT5G62940;AT2G46590;AT1G07640;AT1G21340;AT1G26790;AT1G47655;AT1G51700;AT1G69570;AT2G28510;AT2G28810;AT2G34140;AT3G50410;AT3G55370;AT3G61850;AT4G00940;AT4G21050;AT4G21080;AT4G24060;AT5G02460;AT5G62430;AT5G65590;AT5G66940
HORVU.MOREX.r3.5HG0424430.723	HvPUT1	TF_motif_seq_0239	406	-	CCCTT	Dof	AT1G29160;AT1G64620;AT2G37590;AT3G21270;AT3G45610;AT3G47500;AT4G38000;AT5G39660;AT5G60200;AT5G60850;AT5G62940;AT2G46590;AT1G07640;AT1G21340;AT1G26790;AT1G47655;AT1G51700;AT1G69570;AT2G28510;AT2G28810;AT2G34140;AT3G50410;AT3G55370;AT3G61850;AT4G00940;AT4G21050;AT4G21080;AT4G24060;AT5G02460;AT5G62430;AT5G65590;AT5G66940
HORVU.MOREX.r3.5HG0424430.724	HvPUT1	TF_motif_seq_0239	407	-	CCTTT	Dof	AT1G29160;AT1G64620;AT2G37590;AT3G21270;AT3G45610;AT3G47500;AT4G38000;AT5G39660;AT5G60200;AT5G60850;AT5G62940;AT2G46590;AT1G07640;AT1G21340;AT1G26790;AT1G47655;AT1G51700;AT1G69570;AT2G28510;AT2G28810;AT2G34140;AT3G50410;AT3G55370;AT3G61850;AT4G00940;AT4G21050;AT4G21080;AT4G24060;AT5G02460;AT5G62430;AT5G65590;AT5G66940
HORVU.MOREX.r3.5HG0424430.725	HvPUT1	TF_motif_seq_0239	628	+	AAAGA	Dof	AT1G29160;AT1G64620;AT2G37590;AT3G21270;AT3G45610;AT3G47500;AT4G38000;AT5G39660;AT5G60200;AT5G60850;AT5G62940;AT2G46590;AT1G07640;AT1G21340;AT1G26790;AT1G47655;AT1G51700;AT1G69570;AT2G28510;AT2G28810;AT2G34140;AT3G50410;AT3G55370;AT3G61850;AT4G00940;AT4G21050;AT4G21080;AT4G24060;AT5G02460;AT5G62430;AT5G65590;AT5G66940
HORVU.MOREX.r3.5HG0424430.726	HvPUT1	TF_motif_seq_0239	711	-	ACCTT	Dof	AT1G29160;AT1G64620;AT2G37590;AT3G21270;AT3G45610;AT3G47500;AT4G38000;AT5G39660;AT5G60200;AT5G60850;AT5G62940;AT2G46590;AT1G07640;AT1G21340;AT1G26790;AT1G47655;AT1G51700;AT1G69570;AT2G28510;AT2G28810;AT2G34140;AT3G50410;AT3G55370;AT3G61850;AT4G00940;AT4G21050;AT4G21080;AT4G24060;AT5G02460;AT5G62430;AT5G65590;AT5G66940
HORVU.MOREX.r3.5HG0424430.727	HvPUT1	TF_motif_seq_0239	712	-	CCTTT	Dof	AT1G29160;AT1G64620;AT2G37590;AT3G21270;AT3G45610;AT3G47500;AT4G38000;AT5G39660;AT5G60200;AT5G60850;AT5G62940;AT2G46590;AT1G07640;AT1G21340;AT1G26790;AT1G47655;AT1G51700;AT1G69570;AT2G28510;AT2G28810;AT2G34140;AT3G50410;AT3G55370;AT3G61850;AT4G00940;AT4G21050;AT4G21080;AT4G24060;AT5G02460;AT5G62430;AT5G65590;AT5G66940
HORVU.MOREX.r3.5HG0424430.728	HvPUT1	TF_motif_seq_0239	748	+	AAAGT	Dof	AT1G29160;AT1G64620;AT2G37590;AT3G21270;AT3G45610;AT3G47500;AT4G38000;AT5G39660;AT5G60200;AT5G60850;AT5G62940;AT2G46590;AT1G07640;AT1G21340;AT1G26790;AT1G47655;AT1G51700;AT1G69570;AT2G28510;AT2G28810;AT2G34140;AT3G50410;AT3G55370;AT3G61850;AT4G00940;AT4G21050;AT4G21080;AT4G24060;AT5G02460;AT5G62430;AT5G65590;AT5G66940
HORVU.MOREX.r3.5HG0424430.729	HvPUT1	TF_motif_seq_0239	863	+	AAGGT	Dof	AT1G29160;AT1G64620;AT2G37590;AT3G21270;AT3G45610;AT3G47500;AT4G38000;AT5G39660;AT5G60200;AT5G60850;AT5G62940;AT2G46590;AT1G07640;AT1G21340;AT1G26790;AT1G47655;AT1G51700;AT1G69570;AT2G28510;AT2G28810;AT2G34140;AT3G50410;AT3G55370;AT3G61850;AT4G00940;AT4G21050;AT4G21080;AT4G24060;AT5G02460;AT5G62430;AT5G65590;AT5G66940
HORVU.MOREX.r3.5HG0424430.730	HvPUT1	TF_motif_seq_0239	954	-	ACCTT	Dof	AT1G29160;AT1G64620;AT2G37590;AT3G21270;AT3G45610;AT3G47500;AT4G38000;AT5G39660;AT5G60200;AT5G60850;AT5G62940;AT2G46590;AT1G07640;AT1G21340;AT1G26790;AT1G47655;AT1G51700;AT1G69570;AT2G28510;AT2G28810;AT2G34140;AT3G50410;AT3G55370;AT3G61850;AT4G00940;AT4G21050;AT4G21080;AT4G24060;AT5G02460;AT5G62430;AT5G65590;AT5G66940
HORVU.MOREX.r3.5HG0424430.731	HvPUT1	TF_motif_seq_0239	1029	-	GCTTT	Dof	AT1G29160;AT1G64620;AT2G37590;AT3G21270;AT3G45610;AT3G47500;AT4G38000;AT5G39660;AT5G60200;AT5G60850;AT5G62940;AT2G46590;AT1G07640;AT1G21340;AT1G26790;AT1G47655;AT1G51700;AT1G69570;AT2G28510;AT2G28810;AT2G34140;AT3G50410;AT3G55370;AT3G61850;AT4G00940;AT4G21050;AT4G21080;AT4G24060;AT5G02460;AT5G62430;AT5G65590;AT5G66940
HORVU.MOREX.r3.5HG0424430.732	HvPUT1	TF_motif_seq_0239	1090	+	AAGGT	Dof	AT1G29160;AT1G64620;AT2G37590;AT3G21270;AT3G45610;AT3G47500;AT4G38000;AT5G39660;AT5G60200;AT5G60850;AT5G62940;AT2G46590;AT1G07640;AT1G21340;AT1G26790;AT1G47655;AT1G51700;AT1G69570;AT2G28510;AT2G28810;AT2G34140;AT3G50410;AT3G55370;AT3G61850;AT4G00940;AT4G21050;AT4G21080;AT4G24060;AT5G02460;AT5G62430;AT5G65590;AT5G66940
HORVU.MOREX.r3.5HG0424430.733	HvPUT1	TF_motif_seq_0239	1113	-	TCTTT	Dof	AT1G29160;AT1G64620;AT2G37590;AT3G21270;AT3G45610;AT3G47500;AT4G38000;AT5G39660;AT5G60200;AT5G60850;AT5G62940;AT2G46590;AT1G07640;AT1G21340;AT1G26790;AT1G47655;AT1G51700;AT1G69570;AT2G28510;AT2G28810;AT2G34140;AT3G50410;AT3G55370;AT3G61850;AT4G00940;AT4G21050;AT4G21080;AT4G24060;AT5G02460;AT5G62430;AT5G65590;AT5G66940
HORVU.MOREX.r3.5HG0424430.734	HvPUT1	TF_motif_seq_0239	1356	+	AAAGA	Dof	AT1G29160;AT1G64620;AT2G37590;AT3G21270;AT3G45610;AT3G47500;AT4G38000;AT5G39660;AT5G60200;AT5G60850;AT5G62940;AT2G46590;AT1G07640;AT1G21340;AT1G26790;AT1G47655;AT1G51700;AT1G69570;AT2G28510;AT2G28810;AT2G34140;AT3G50410;AT3G55370;AT3G61850;AT4G00940;AT4G21050;AT4G21080;AT4G24060;AT5G02460;AT5G62430;AT5G65590;AT5G66940
HORVU.MOREX.r3.5HG0424430.735	HvPUT1	TF_motif_seq_0239	1382	-	TCCTT	Dof	AT1G29160;AT1G64620;AT2G37590;AT3G21270;AT3G45610;AT3G47500;AT4G38000;AT5G39660;AT5G60200;AT5G60850;AT5G62940;AT2G46590;AT1G07640;AT1G21340;AT1G26790;AT1G47655;AT1G51700;AT1G69570;AT2G28510;AT2G28810;AT2G34140;AT3G50410;AT3G55370;AT3G61850;AT4G00940;AT4G21050;AT4G21080;AT4G24060;AT5G02460;AT5G62430;AT5G65590;AT5G66940
HORVU.MOREX.r3.5HG0424430.736	HvPUT1	TF_motif_seq_0239	1383	-	CCTTT	Dof	AT1G29160;AT1G64620;AT2G37590;AT3G21270;AT3G45610;AT3G47500;AT4G38000;AT5G39660;AT5G60200;AT5G60850;AT5G62940;AT2G46590;AT1G07640;AT1G21340;AT1G26790;AT1G47655;AT1G51700;AT1G69570;AT2G28510;AT2G28810;AT2G34140;AT3G50410;AT3G55370;AT3G61850;AT4G00940;AT4G21050;AT4G21080;AT4G24060;AT5G02460;AT5G62430;AT5G65590;AT5G66940
HORVU.MOREX.r3.5HG0424430.737	HvPUT1	TF_motif_seq_0239	1396	+	AAAGG	Dof	AT1G29160;AT1G64620;AT2G37590;AT3G21270;AT3G45610;AT3G47500;AT4G38000;AT5G39660;AT5G60200;AT5G60850;AT5G62940;AT2G46590;AT1G07640;AT1G21340;AT1G26790;AT1G47655;AT1G51700;AT1G69570;AT2G28510;AT2G28810;AT2G34140;AT3G50410;AT3G55370;AT3G61850;AT4G00940;AT4G21050;AT4G21080;AT4G24060;AT5G02460;AT5G62430;AT5G65590;AT5G66940
HORVU.MOREX.r3.5HG0424430.738	HvPUT1	TF_motif_seq_0239	1397	+	AAGGA	Dof	AT1G29160;AT1G64620;AT2G37590;AT3G21270;AT3G45610;AT3G47500;AT4G38000;AT5G39660;AT5G60200;AT5G60850;AT5G62940;AT2G46590;AT1G07640;AT1G21340;AT1G26790;AT1G47655;AT1G51700;AT1G69570;AT2G28510;AT2G28810;AT2G34140;AT3G50410;AT3G55370;AT3G61850;AT4G00940;AT4G21050;AT4G21080;AT4G24060;AT5G02460;AT5G62430;AT5G65590;AT5G66940
HORVU.MOREX.r3.5HG0424430.739	HvPUT1	TF_motif_seq_0239	1422	-	CCCTT	Dof	AT1G29160;AT1G64620;AT2G37590;AT3G21270;AT3G45610;AT3G47500;AT4G38000;AT5G39660;AT5G60200;AT5G60850;AT5G62940;AT2G46590;AT1G07640;AT1G21340;AT1G26790;AT1G47655;AT1G51700;AT1G69570;AT2G28510;AT2G28810;AT2G34140;AT3G50410;AT3G55370;AT3G61850;AT4G00940;AT4G21050;AT4G21080;AT4G24060;AT5G02460;AT5G62430;AT5G65590;AT5G66940
HORVU.MOREX.r3.5HG0424430.740	HvPUT1	TF_motif_seq_0239	1490	+	AAGGA	Dof	AT1G29160;AT1G64620;AT2G37590;AT3G21270;AT3G45610;AT3G47500;AT4G38000;AT5G39660;AT5G60200;AT5G60850;AT5G62940;AT2G46590;AT1G07640;AT1G21340;AT1G26790;AT1G47655;AT1G51700;AT1G69570;AT2G28510;AT2G28810;AT2G34140;AT3G50410;AT3G55370;AT3G61850;AT4G00940;AT4G21050;AT4G21080;AT4G24060;AT5G02460;AT5G62430;AT5G65590;AT5G66940
HORVU.MOREX.r3.5HG0424430.741	HvPUT1	TF_motif_seq_0239	1495	-	TCCTT	Dof	AT1G29160;AT1G64620;AT2G37590;AT3G21270;AT3G45610;AT3G47500;AT4G38000;AT5G39660;AT5G60200;AT5G60850;AT5G62940;AT2G46590;AT1G07640;AT1G21340;AT1G26790;AT1G47655;AT1G51700;AT1G69570;AT2G28510;AT2G28810;AT2G34140;AT3G50410;AT3G55370;AT3G61850;AT4G00940;AT4G21050;AT4G21080;AT4G24060;AT5G02460;AT5G62430;AT5G65590;AT5G66940
HORVU.MOREX.r3.5HG0424430.742	HvPUT1	TF_motif_seq_0240	59	-	CACGT	bZIP	AT3G54620;AT4G02640
HORVU.MOREX.r3.5HG0424430.743	HvPUT1	TF_motif_seq_0240	60	+	ACGTT	bZIP	AT3G54620;AT4G02640
HORVU.MOREX.r3.5HG0424430.744	HvPUT1	TF_motif_seq_0241	336	-	CTAAT	ZF-HD	AT1G75240
HORVU.MOREX.r3.5HG0424430.745	HvPUT1	TF_motif_seq_0241	492	-	CTAAT	ZF-HD	AT1G75240
HORVU.MOREX.r3.5HG0424430.746	HvPUT1	TF_motif_seq_0241	514	+	ATTAG	ZF-HD	AT1G75240
HORVU.MOREX.r3.5HG0424430.747	HvPUT1	TF_motif_seq_0241	670	+	ATTAC	ZF-HD	AT1G75240
HORVU.MOREX.r3.5HG0424430.748	HvPUT1	TF_motif_seq_0241	806	+	ATTAA	ZF-HD	AT1G75240
HORVU.MOREX.r3.5HG0424430.749	HvPUT1	TF_motif_seq_0241	949	-	GTAAT	ZF-HD	AT1G75240
HORVU.MOREX.r3.5HG0424430.750	HvPUT1	TF_motif_seq_0241	1006	-	ATAAT	ZF-HD	AT1G75240
HORVU.MOREX.r3.5HG0424430.751	HvPUT1	TF_motif_seq_0241	1040	-	TTAAT	ZF-HD	AT1G75240
HORVU.MOREX.r3.5HG0424430.752	HvPUT1	TF_motif_seq_0241	1043	+	ATTAT	ZF-HD	AT1G75240
HORVU.MOREX.r3.5HG0424430.753	HvPUT1	TF_motif_seq_0241	1074	+	ATTAT	ZF-HD	AT1G75240
HORVU.MOREX.r3.5HG0424430.754	HvPUT1	TF_motif_seq_0241	1087	+	ATTAA	ZF-HD	AT1G75240
HORVU.MOREX.r3.5HG0424430.755	HvPUT1	TF_motif_seq_0241	1109	+	ATTAT	ZF-HD	AT1G75240
HORVU.MOREX.r3.5HG0424430.756	HvPUT1	TF_motif_seq_0241	1124	+	ATTAT	ZF-HD	AT1G75240
HORVU.MOREX.r3.5HG0424430.757	HvPUT1	TF_motif_seq_0241	1155	+	ATTAC	ZF-HD	AT1G75240
HORVU.MOREX.r3.5HG0424430.758	HvPUT1	TF_motif_seq_0241	1222	+	ATTAT	ZF-HD	AT1G75240
HORVU.MOREX.r3.5HG0424430.759	HvPUT1	TF_motif_seq_0241	1228	+	ATTAA	ZF-HD	AT1G75240
HORVU.MOREX.r3.5HG0424430.760	HvPUT1	TF_motif_seq_0241	1229	-	TTAAT	ZF-HD	AT1G75240
HORVU.MOREX.r3.5HG0424430.761	HvPUT1	TF_motif_seq_0241	1260	+	ATTAT	ZF-HD	AT1G75240
HORVU.MOREX.r3.5HG0424430.762	HvPUT1	TF_motif_seq_0241	1292	+	ATTAC	ZF-HD	AT1G75240
HORVU.MOREX.r3.5HG0424430.763	HvPUT1	TF_motif_seq_0241	1321	+	ATTAA	ZF-HD	AT1G75240
HORVU.MOREX.r3.5HG0424430.764	HvPUT1	TF_motif_seq_0241	1322	-	TTAAT	ZF-HD	AT1G75240
HORVU.MOREX.r3.5HG0424430.765	HvPUT1	TF_motif_seq_0241	1447	+	ATTAC	ZF-HD	AT1G75240
HORVU.MOREX.r3.5HG0424430.766	HvPUT1	TF_motif_seq_0241	1470	-	TTAAT	ZF-HD	AT1G75240
HORVU.MOREX.r3.5HG0424430.767	HvPUT1	TF_motif_seq_0243	34	+	GATAG	GATA; tify	AT1G51600;AT2G45050;AT3G06740;AT3G16870;AT3G21175;AT3G24050;AT3G54810;AT3G60530;AT4G17570;AT4G24470;AT4G26150;AT4G32890;AT4G34680;AT5G25830;AT5G26930;AT5G56860;AT5G66320;AT2G18380;AT3G50870;AT4G36620
HORVU.MOREX.r3.5HG0424430.768	HvPUT1	TF_motif_seq_0243	55	+	GATAC	GATA; tify	AT1G51600;AT2G45050;AT3G06740;AT3G16870;AT3G21175;AT3G24050;AT3G54810;AT3G60530;AT4G17570;AT4G24470;AT4G26150;AT4G32890;AT4G34680;AT5G25830;AT5G26930;AT5G56860;AT5G66320;AT2G18380;AT3G50870;AT4G36620
HORVU.MOREX.r3.5HG0424430.769	HvPUT1	TF_motif_seq_0243	193	+	GATAA	GATA; tify	AT1G51600;AT2G45050;AT3G06740;AT3G16870;AT3G21175;AT3G24050;AT3G54810;AT3G60530;AT4G17570;AT4G24470;AT4G26150;AT4G32890;AT4G34680;AT5G25830;AT5G26930;AT5G56860;AT5G66320;AT2G18380;AT3G50870;AT4G36620
HORVU.MOREX.r3.5HG0424430.770	HvPUT1	TF_motif_seq_0243	478	+	GATAA	GATA; tify	AT1G51600;AT2G45050;AT3G06740;AT3G16870;AT3G21175;AT3G24050;AT3G54810;AT3G60530;AT4G17570;AT4G24470;AT4G26150;AT4G32890;AT4G34680;AT5G25830;AT5G26930;AT5G56860;AT5G66320;AT2G18380;AT3G50870;AT4G36620
HORVU.MOREX.r3.5HG0424430.771	HvPUT1	TF_motif_seq_0243	599	+	GATAC	GATA; tify	AT1G51600;AT2G45050;AT3G06740;AT3G16870;AT3G21175;AT3G24050;AT3G54810;AT3G60530;AT4G17570;AT4G24470;AT4G26150;AT4G32890;AT4G34680;AT5G25830;AT5G26930;AT5G56860;AT5G66320;AT2G18380;AT3G50870;AT4G36620
HORVU.MOREX.r3.5HG0424430.772	HvPUT1	TF_motif_seq_0243	939	+	GATAC	GATA; tify	AT1G51600;AT2G45050;AT3G06740;AT3G16870;AT3G21175;AT3G24050;AT3G54810;AT3G60530;AT4G17570;AT4G24470;AT4G26150;AT4G32890;AT4G34680;AT5G25830;AT5G26930;AT5G56860;AT5G66320;AT2G18380;AT3G50870;AT4G36620
HORVU.MOREX.r3.5HG0424430.773	HvPUT1	TF_motif_seq_0243	1084	+	GATAT	GATA; tify	AT1G51600;AT2G45050;AT3G06740;AT3G16870;AT3G21175;AT3G24050;AT3G54810;AT3G60530;AT4G17570;AT4G24470;AT4G26150;AT4G32890;AT4G34680;AT5G25830;AT5G26930;AT5G56860;AT5G66320;AT2G18380;AT3G50870;AT4G36620
HORVU.MOREX.r3.5HG0424430.774	HvPUT1	TF_motif_seq_0243	1110	-	TTATC	GATA; tify	AT1G51600;AT2G45050;AT3G06740;AT3G16870;AT3G21175;AT3G24050;AT3G54810;AT3G60530;AT4G17570;AT4G24470;AT4G26150;AT4G32890;AT4G34680;AT5G25830;AT5G26930;AT5G56860;AT5G66320;AT2G18380;AT3G50870;AT4G36620
HORVU.MOREX.r3.5HG0424430.775	HvPUT1	TF_motif_seq_0243	1217	+	GATAT	GATA; tify	AT1G51600;AT2G45050;AT3G06740;AT3G16870;AT3G21175;AT3G24050;AT3G54810;AT3G60530;AT4G17570;AT4G24470;AT4G26150;AT4G32890;AT4G34680;AT5G25830;AT5G26930;AT5G56860;AT5G66320;AT2G18380;AT3G50870;AT4G36620
HORVU.MOREX.r3.5HG0424430.776	HvPUT1	TF_motif_seq_0244	568	-	CGTAC	SBP	AT2G33810;AT2G47070
HORVU.MOREX.r3.5HG0424430.777	HvPUT1	TF_motif_seq_0244	569	+	GTACC	SBP	AT2G33810;AT2G47070
HORVU.MOREX.r3.5HG0424430.778	HvPUT1	TF_motif_seq_0244	693	-	TGTAC	SBP	AT2G33810;AT2G47070
HORVU.MOREX.r3.5HG0424430.779	HvPUT1	TF_motif_seq_0244	694	+	GTACC	SBP	AT2G33810;AT2G47070
HORVU.MOREX.r3.5HG0424430.780	HvPUT1	TF_motif_seq_0244	1429	-	TGTAC	SBP	AT2G33810;AT2G47070
HORVU.MOREX.r3.5HG0424430.781	HvPUT1	TF_motif_seq_0244	1430	+	GTACG	SBP	AT2G33810;AT2G47070
HORVU.MOREX.r3.5HG0424430.782	HvPUT1	TF_motif_seq_0246	93	-	GGTCA	Homeodomain; TALE;TALE	AT1G23380;AT1G62360;AT1G70510;AT4G08150;Os03g0727000;GRMZM2G017087
HORVU.MOREX.r3.5HG0424430.783	HvPUT1	TF_motif_seq_0246	472	+	TGACC	Homeodomain; TALE;TALE	AT1G23380;AT1G62360;AT1G70510;AT4G08150;Os03g0727000;GRMZM2G017087
HORVU.MOREX.r3.5HG0424430.784	HvPUT1	TF_motif_seq_0246	576	+	TGACA	Homeodomain; TALE;TALE	AT1G23380;AT1G62360;AT1G70510;AT4G08150;Os03g0727000;GRMZM2G017087
HORVU.MOREX.r3.5HG0424430.785	HvPUT1	TF_motif_seq_0246	593	-	AGTCA	Homeodomain; TALE;TALE	AT1G23380;AT1G62360;AT1G70510;AT4G08150;Os03g0727000;GRMZM2G017087
HORVU.MOREX.r3.5HG0424430.786	HvPUT1	TF_motif_seq_0246	1063	+	TGACC	Homeodomain; TALE;TALE	AT1G23380;AT1G62360;AT1G70510;AT4G08150;Os03g0727000;GRMZM2G017087
HORVU.MOREX.r3.5HG0424430.787	HvPUT1	TF_motif_seq_0246	1151	-	AGTCA	Homeodomain; TALE;TALE	AT1G23380;AT1G62360;AT1G70510;AT4G08150;Os03g0727000;GRMZM2G017087
HORVU.MOREX.r3.5HG0424430.788	HvPUT1	TF_motif_seq_0246	1168	+	TGACA	Homeodomain; TALE;TALE	AT1G23380;AT1G62360;AT1G70510;AT4G08150;Os03g0727000;GRMZM2G017087
HORVU.MOREX.r3.5HG0424430.789	HvPUT1	TF_motif_seq_0251	134	+	GCCCG	TCP	AT3G27010
HORVU.MOREX.r3.5HG0424430.790	HvPUT1	TF_motif_seq_0251	242	-	CGGGC	TCP	AT3G27010
HORVU.MOREX.r3.5HG0424430.791	HvPUT1	TF_motif_seq_0251	249	-	CGGGC	TCP	AT3G27010
HORVU.MOREX.r3.5HG0424430.792	HvPUT1	TF_motif_seq_0251	1433	-	CGGGC	TCP	AT3G27010
HORVU.MOREX.r3.5HG0424430.793	HvPUT1	TF_motif_seq_0252	487	-	AATCT	Myb/SANT; MYB; ARR-B;MYB;ARR-B	AT2G01760;AT3G16857;AT4G16110;AT4G18020;AT4G31920;AT5G58080;AT1G67710;AT1G49190;AT2G25180;AT5G49240
HORVU.MOREX.r3.5HG0424430.794	HvPUT1	TF_motif_seq_0252	1131	-	AATCC	Myb/SANT; MYB; ARR-B;MYB;ARR-B	AT2G01760;AT3G16857;AT4G16110;AT4G18020;AT4G31920;AT5G58080;AT1G67710;AT1G49190;AT2G25180;AT5G49240
HORVU.MOREX.r3.5HG0424430.795	HvPUT1	TF_motif_seq_0252	1375	-	AATCT	Myb/SANT; MYB; ARR-B;MYB;ARR-B	AT2G01760;AT3G16857;AT4G16110;AT4G18020;AT4G31920;AT5G58080;AT1G67710;AT1G49190;AT2G25180;AT5G49240
HORVU.MOREX.r3.5HG0424430.796	HvPUT1	TF_motif_seq_0252	1411	-	AATCC	Myb/SANT; MYB; ARR-B;MYB;ARR-B	AT2G01760;AT3G16857;AT4G16110;AT4G18020;AT4G31920;AT5G58080;AT1G67710;AT1G49190;AT2G25180;AT5G49240
HORVU.MOREX.r3.5HG0424430.797	HvPUT1	TF_motif_seq_0252	1472	-	AATCT	Myb/SANT; MYB; ARR-B;MYB;ARR-B	AT2G01760;AT3G16857;AT4G16110;AT4G18020;AT4G31920;AT5G58080;AT1G67710;AT1G49190;AT2G25180;AT5G49240
HORVU.MOREX.r3.5HG0424430.798	HvPUT1	TF_motif_seq_0254	36	-	TAGAT	AP2; ERF	AT3G14230
HORVU.MOREX.r3.5HG0424430.799	HvPUT1	TF_motif_seq_0254	46	+	ATCAA	AP2; ERF	AT3G14230
HORVU.MOREX.r3.5HG0424430.800	HvPUT1	TF_motif_seq_0254	53	-	AAGAT	AP2; ERF	AT3G14230
HORVU.MOREX.r3.5HG0424430.801	HvPUT1	TF_motif_seq_0254	161	-	TGGAT	AP2; ERF	AT3G14230
HORVU.MOREX.r3.5HG0424430.802	HvPUT1	TF_motif_seq_0254	176	+	AACTA	AP2; ERF	AT3G14230
HORVU.MOREX.r3.5HG0424430.803	HvPUT1	TF_motif_seq_0254	191	-	TGGAT	AP2; ERF	AT3G14230
HORVU.MOREX.r3.5HG0424430.804	HvPUT1	TF_motif_seq_0254	223	+	ATCAA	AP2; ERF	AT3G14230
HORVU.MOREX.r3.5HG0424430.805	HvPUT1	TF_motif_seq_0254	234	-	TAGAG	AP2; ERF	AT3G14230
HORVU.MOREX.r3.5HG0424430.806	HvPUT1	TF_motif_seq_0254	262	+	ATCGA	AP2; ERF	AT3G14230
HORVU.MOREX.r3.5HG0424430.807	HvPUT1	TF_motif_seq_0254	271	+	ACCTA	AP2; ERF	AT3G14230
HORVU.MOREX.r3.5HG0424430.808	HvPUT1	TF_motif_seq_0254	274	-	TAGAT	AP2; ERF	AT3G14230
HORVU.MOREX.r3.5HG0424430.809	HvPUT1	TF_motif_seq_0254	318	+	TTCTA	AP2; ERF	AT3G14230
HORVU.MOREX.r3.5HG0424430.810	HvPUT1	TF_motif_seq_0254	364	-	TAAAT	AP2; ERF	AT3G14230
HORVU.MOREX.r3.5HG0424430.811	HvPUT1	TF_motif_seq_0254	400	-	TAGCT	AP2; ERF	AT3G14230
HORVU.MOREX.r3.5HG0424430.812	HvPUT1	TF_motif_seq_0254	424	-	CAGAT	AP2; ERF	AT3G14230
HORVU.MOREX.r3.5HG0424430.813	HvPUT1	TF_motif_seq_0254	442	-	TAAAT	AP2; ERF	AT3G14230
HORVU.MOREX.r3.5HG0424430.814	HvPUT1	TF_motif_seq_0254	488	+	ATCTC	AP2; ERF	AT3G14230
HORVU.MOREX.r3.5HG0424430.815	HvPUT1	TF_motif_seq_0254	490	+	CTCTA	AP2; ERF	AT3G14230
HORVU.MOREX.r3.5HG0424430.816	HvPUT1	TF_motif_seq_0254	536	-	TAAAT	AP2; ERF	AT3G14230
HORVU.MOREX.r3.5HG0424430.817	HvPUT1	TF_motif_seq_0254	550	-	TAAAT	AP2; ERF	AT3G14230
HORVU.MOREX.r3.5HG0424430.818	HvPUT1	TF_motif_seq_0254	665	+	ATCAA	AP2; ERF	AT3G14230
HORVU.MOREX.r3.5HG0424430.819	HvPUT1	TF_motif_seq_0254	692	+	ATGTA	AP2; ERF	AT3G14230
HORVU.MOREX.r3.5HG0424430.820	HvPUT1	TF_motif_seq_0254	707	+	ATTTA	AP2; ERF	AT3G14230
HORVU.MOREX.r3.5HG0424430.821	HvPUT1	TF_motif_seq_0254	718	+	ATTTA	AP2; ERF	AT3G14230
HORVU.MOREX.r3.5HG0424430.822	HvPUT1	TF_motif_seq_0254	871	-	TCGAT	AP2; ERF	AT3G14230
HORVU.MOREX.r3.5HG0424430.823	HvPUT1	TF_motif_seq_0254	904	-	TAGAA	AP2; ERF	AT3G14230
HORVU.MOREX.r3.5HG0424430.824	HvPUT1	TF_motif_seq_0254	915	-	TAGAC	AP2; ERF	AT3G14230
HORVU.MOREX.r3.5HG0424430.825	HvPUT1	TF_motif_seq_0254	947	+	ATGTA	AP2; ERF	AT3G14230
HORVU.MOREX.r3.5HG0424430.826	HvPUT1	TF_motif_seq_0254	1009	+	ATATA	AP2; ERF	AT3G14230
HORVU.MOREX.r3.5HG0424430.827	HvPUT1	TF_motif_seq_0254	1010	-	TATAT	AP2; ERF	AT3G14230
HORVU.MOREX.r3.5HG0424430.828	HvPUT1	TF_motif_seq_0254	1034	+	TTCTA	AP2; ERF	AT3G14230
HORVU.MOREX.r3.5HG0424430.829	HvPUT1	TF_motif_seq_0254	1078	-	TAGAA	AP2; ERF	AT3G14230
HORVU.MOREX.r3.5HG0424430.830	HvPUT1	TF_motif_seq_0254	1095	+	TTCTA	AP2; ERF	AT3G14230
HORVU.MOREX.r3.5HG0424430.831	HvPUT1	TF_motif_seq_0254	1098	-	TAGAA	AP2; ERF	AT3G14230
HORVU.MOREX.r3.5HG0424430.832	HvPUT1	TF_motif_seq_0254	1112	+	ATCTT	AP2; ERF	AT3G14230
HORVU.MOREX.r3.5HG0424430.833	HvPUT1	TF_motif_seq_0254	1132	+	ATCCA	AP2; ERF	AT3G14230
HORVU.MOREX.r3.5HG0424430.834	HvPUT1	TF_motif_seq_0254	1163	-	TATAT	AP2; ERF	AT3G14230
HORVU.MOREX.r3.5HG0424430.835	HvPUT1	TF_motif_seq_0254	1218	+	ATATA	AP2; ERF	AT3G14230
HORVU.MOREX.r3.5HG0424430.836	HvPUT1	TF_motif_seq_0254	1219	-	TATAT	AP2; ERF	AT3G14230
HORVU.MOREX.r3.5HG0424430.837	HvPUT1	TF_motif_seq_0254	1247	-	TAAAT	AP2; ERF	AT3G14230
HORVU.MOREX.r3.5HG0424430.838	HvPUT1	TF_motif_seq_0254	1254	-	TAAAT	AP2; ERF	AT3G14230
HORVU.MOREX.r3.5HG0424430.839	HvPUT1	TF_motif_seq_0254	1271	+	TTCTA	AP2; ERF	AT3G14230
HORVU.MOREX.r3.5HG0424430.840	HvPUT1	TF_motif_seq_0254	1294	-	TACAT	AP2; ERF	AT3G14230
HORVU.MOREX.r3.5HG0424430.841	HvPUT1	TF_motif_seq_0254	1298	-	TAGAA	AP2; ERF	AT3G14230
HORVU.MOREX.r3.5HG0424430.842	HvPUT1	TF_motif_seq_0254	1328	+	ATATA	AP2; ERF	AT3G14230
HORVU.MOREX.r3.5HG0424430.843	HvPUT1	TF_motif_seq_0254	1376	+	ATCTG	AP2; ERF	AT3G14230
HORVU.MOREX.r3.5HG0424430.844	HvPUT1	TF_motif_seq_0254	1412	+	ATCCA	AP2; ERF	AT3G14230
HORVU.MOREX.r3.5HG0424430.845	HvPUT1	TF_motif_seq_0254	1473	+	ATCTG	AP2; ERF	AT3G14230
HORVU.MOREX.r3.5HG0424430.846	HvPUT1	TF_motif_seq_0255	725	+	CAACA	AP2; RAV; B3	AT1G25560;AT1G13260
HORVU.MOREX.r3.5HG0424430.847	HvPUT1	TF_motif_seq_0255	817	-	TGTTG	AP2; RAV; B3	AT1G25560;AT1G13260
HORVU.MOREX.r3.5HG0424430.848	HvPUT1	TF_motif_seq_0255	972	+	CAACA	AP2; RAV; B3	AT1G25560;AT1G13260
HORVU.MOREX.r3.5HG0424430.849	HvPUT1	TF_motif_seq_0256	25	-	GCGTG	B3	Os04g0676600;Os08g0101000
HORVU.MOREX.r3.5HG0424430.850	HvPUT1	TF_motif_seq_0256	48	+	CAAGC	B3	Os04g0676600;Os08g0101000
HORVU.MOREX.r3.5HG0424430.851	HvPUT1	TF_motif_seq_0256	51	-	GCAAG	B3	Os04g0676600;Os08g0101000
HORVU.MOREX.r3.5HG0424430.852	HvPUT1	TF_motif_seq_0256	88	+	CATCC	B3	Os04g0676600;Os08g0101000
HORVU.MOREX.r3.5HG0424430.853	HvPUT1	TF_motif_seq_0256	103	-	CCATG	B3	Os04g0676600;Os08g0101000
HORVU.MOREX.r3.5HG0424430.854	HvPUT1	TF_motif_seq_0256	104	+	CATGC	B3	Os04g0676600;Os08g0101000
HORVU.MOREX.r3.5HG0424430.855	HvPUT1	TF_motif_seq_0256	131	+	CACGC	B3	Os04g0676600;Os08g0101000
HORVU.MOREX.r3.5HG0424430.856	HvPUT1	TF_motif_seq_0256	151	-	CCATG	B3	Os04g0676600;Os08g0101000
HORVU.MOREX.r3.5HG0424430.857	HvPUT1	TF_motif_seq_0256	152	+	CATGG	B3	Os04g0676600;Os08g0101000
HORVU.MOREX.r3.5HG0424430.858	HvPUT1	TF_motif_seq_0256	162	-	GGATG	B3	Os04g0676600;Os08g0101000
HORVU.MOREX.r3.5HG0424430.859	HvPUT1	TF_motif_seq_0256	202	-	GTATG	B3	Os04g0676600;Os08g0101000
HORVU.MOREX.r3.5HG0424430.860	HvPUT1	TF_motif_seq_0256	354	-	GTATG	B3	Os04g0676600;Os08g0101000
HORVU.MOREX.r3.5HG0424430.861	HvPUT1	TF_motif_seq_0256	366	+	AATGC	B3	Os04g0676600;Os08g0101000
HORVU.MOREX.r3.5HG0424430.862	HvPUT1	TF_motif_seq_0256	498	-	GCCTG	B3	Os04g0676600;Os08g0101000
HORVU.MOREX.r3.5HG0424430.863	HvPUT1	TF_motif_seq_0256	538	+	AATGC	B3	Os04g0676600;Os08g0101000
HORVU.MOREX.r3.5HG0424430.864	HvPUT1	TF_motif_seq_0256	612	-	CCATG	B3	Os04g0676600;Os08g0101000
HORVU.MOREX.r3.5HG0424430.865	HvPUT1	TF_motif_seq_0256	613	+	CATGA	B3	Os04g0676600;Os08g0101000
HORVU.MOREX.r3.5HG0424430.866	HvPUT1	TF_motif_seq_0256	663	-	GCATC	B3	Os04g0676600;Os08g0101000
HORVU.MOREX.r3.5HG0424430.867	HvPUT1	TF_motif_seq_0256	676	+	CATCC	B3	Os04g0676600;Os08g0101000
HORVU.MOREX.r3.5HG0424430.868	HvPUT1	TF_motif_seq_0256	690	-	TCATG	B3	Os04g0676600;Os08g0101000
HORVU.MOREX.r3.5HG0424430.869	HvPUT1	TF_motif_seq_0256	691	+	CATGT	B3	Os04g0676600;Os08g0101000
HORVU.MOREX.r3.5HG0424430.870	HvPUT1	TF_motif_seq_0256	705	-	GCATT	B3	Os04g0676600;Os08g0101000
HORVU.MOREX.r3.5HG0424430.871	HvPUT1	TF_motif_seq_0256	737	-	GCAGG	B3	Os04g0676600;Os08g0101000
HORVU.MOREX.r3.5HG0424430.872	HvPUT1	TF_motif_seq_0256	945	-	CCATG	B3	Os04g0676600;Os08g0101000
HORVU.MOREX.r3.5HG0424430.873	HvPUT1	TF_motif_seq_0256	946	+	CATGT	B3	Os04g0676600;Os08g0101000
HORVU.MOREX.r3.5HG0424430.874	HvPUT1	TF_motif_seq_0256	977	-	GTATG	B3	Os04g0676600;Os08g0101000
HORVU.MOREX.r3.5HG0424430.875	HvPUT1	TF_motif_seq_0256	1019	+	CATTC	B3	Os04g0676600;Os08g0101000
HORVU.MOREX.r3.5HG0424430.876	HvPUT1	TF_motif_seq_0256	1023	-	CCATG	B3	Os04g0676600;Os08g0101000
HORVU.MOREX.r3.5HG0424430.877	HvPUT1	TF_motif_seq_0256	1024	+	CATGT	B3	Os04g0676600;Os08g0101000
HORVU.MOREX.r3.5HG0424430.878	HvPUT1	TF_motif_seq_0256	1060	-	GCTTG	B3	Os04g0676600;Os08g0101000
HORVU.MOREX.r3.5HG0424430.879	HvPUT1	TF_motif_seq_0256	1068	-	GAATG	B3	Os04g0676600;Os08g0101000
HORVU.MOREX.r3.5HG0424430.880	HvPUT1	TF_motif_seq_0256	1080	-	GAATG	B3	Os04g0676600;Os08g0101000
HORVU.MOREX.r3.5HG0424430.881	HvPUT1	TF_motif_seq_0256	1120	-	GCATA	B3	Os04g0676600;Os08g0101000
HORVU.MOREX.r3.5HG0424430.882	HvPUT1	TF_motif_seq_0256	1176	-	GCATG	B3	Os04g0676600;Os08g0101000
HORVU.MOREX.r3.5HG0424430.883	HvPUT1	TF_motif_seq_0256	1177	+	CATGA	B3	Os04g0676600;Os08g0101000
HORVU.MOREX.r3.5HG0424430.884	HvPUT1	TF_motif_seq_0256	1424	+	CTTGC	B3	Os04g0676600;Os08g0101000
HORVU.MOREX.r3.5HG0424430.885	HvPUT1	TF_motif_seq_0256	1439	-	GCATT	B3	Os04g0676600;Os08g0101000
HORVU.MOREX.r3.5HG0424430.886	HvPUT1	TF_motif_seq_0256	1454	-	GCATA	B3	Os04g0676600;Os08g0101000
HORVU.MOREX.r3.5HG0424430.887	HvPUT1	TF_motif_seq_0256	1455	+	CATAC	B3	Os04g0676600;Os08g0101000
HORVU.MOREX.r3.5HG0424430.888	HvPUT1	TF_motif_seq_0256	1459	+	CAAGC	B3	Os04g0676600;Os08g0101000
HORVU.MOREX.r3.5HG0424430.889	HvPUT1	TF_motif_seq_0256	1462	-	GCTTG	B3	Os04g0676600;Os08g0101000
HORVU.MOREX.r3.5HG0424430.890	HvPUT1	TF_motif_seq_0256	1463	+	CTTGC	B3	Os04g0676600;Os08g0101000
HORVU.MOREX.r3.5HG0424430.891	HvPUT1	TF_motif_seq_0257	32	+	CCGAT	NF-YB;NF-YA;NF-YC	AT1G09030;AT1G17590;AT1G21970;AT1G30500;AT1G54160;AT1G54830;AT1G56170;AT1G72830;AT2G38880;AT2G47810;AT3G05690;AT3G14020;AT3G20910;AT3G53340;AT4G14540;AT5G06510;AT5G12840;AT5G27910;AT5G38140;AT5G47640;AT5G47670;AT5G50470;AT5G50480;Os01g0834400;Os02g0725900;Os05g0463800;Os05g0573500
HORVU.MOREX.r3.5HG0424430.892	HvPUT1	TF_motif_seq_0257	159	-	ACTGG	NF-YB;NF-YA;NF-YC	AT1G09030;AT1G17590;AT1G21970;AT1G30500;AT1G54160;AT1G54830;AT1G56170;AT1G72830;AT2G38880;AT2G47810;AT3G05690;AT3G14020;AT3G20910;AT3G53340;AT4G14540;AT5G06510;AT5G12840;AT5G27910;AT5G38140;AT5G47640;AT5G47670;AT5G50470;AT5G50480;Os01g0834400;Os02g0725900;Os05g0463800;Os05g0573500
HORVU.MOREX.r3.5HG0424430.893	HvPUT1	TF_motif_seq_0257	174	+	CCAAC	NF-YB;NF-YA;NF-YC	AT1G09030;AT1G17590;AT1G21970;AT1G30500;AT1G54160;AT1G54830;AT1G56170;AT1G72830;AT2G38880;AT2G47810;AT3G05690;AT3G14020;AT3G20910;AT3G53340;AT4G14540;AT5G06510;AT5G12840;AT5G27910;AT5G38140;AT5G47640;AT5G47670;AT5G50470;AT5G50480;Os01g0834400;Os02g0725900;Os05g0463800;Os05g0573500
HORVU.MOREX.r3.5HG0424430.894	HvPUT1	TF_motif_seq_0257	185	-	ATTGT	NF-YB;NF-YA;NF-YC	AT1G09030;AT1G17590;AT1G21970;AT1G30500;AT1G54160;AT1G54830;AT1G56170;AT1G72830;AT2G38880;AT2G47810;AT3G05690;AT3G14020;AT3G20910;AT3G53340;AT4G14540;AT5G06510;AT5G12840;AT5G27910;AT5G38140;AT5G47640;AT5G47670;AT5G50470;AT5G50480;Os01g0834400;Os02g0725900;Os05g0463800;Os05g0573500
HORVU.MOREX.r3.5HG0424430.895	HvPUT1	TF_motif_seq_0257	210	+	CCACT	NF-YB;NF-YA;NF-YC	AT1G09030;AT1G17590;AT1G21970;AT1G30500;AT1G54160;AT1G54830;AT1G56170;AT1G72830;AT2G38880;AT2G47810;AT3G05690;AT3G14020;AT3G20910;AT3G53340;AT4G14540;AT5G06510;AT5G12840;AT5G27910;AT5G38140;AT5G47640;AT5G47670;AT5G50470;AT5G50480;Os01g0834400;Os02g0725900;Os05g0463800;Os05g0573500
HORVU.MOREX.r3.5HG0424430.896	HvPUT1	TF_motif_seq_0257	330	-	ATCGG	NF-YB;NF-YA;NF-YC	AT1G09030;AT1G17590;AT1G21970;AT1G30500;AT1G54160;AT1G54830;AT1G56170;AT1G72830;AT2G38880;AT2G47810;AT3G05690;AT3G14020;AT3G20910;AT3G53340;AT4G14540;AT5G06510;AT5G12840;AT5G27910;AT5G38140;AT5G47640;AT5G47670;AT5G50470;AT5G50480;Os01g0834400;Os02g0725900;Os05g0463800;Os05g0573500
HORVU.MOREX.r3.5HG0424430.897	HvPUT1	TF_motif_seq_0257	336	+	CTAAT	NF-YB;NF-YA;NF-YC	AT1G09030;AT1G17590;AT1G21970;AT1G30500;AT1G54160;AT1G54830;AT1G56170;AT1G72830;AT2G38880;AT2G47810;AT3G05690;AT3G14020;AT3G20910;AT3G53340;AT4G14540;AT5G06510;AT5G12840;AT5G27910;AT5G38140;AT5G47640;AT5G47670;AT5G50470;AT5G50480;Os01g0834400;Os02g0725900;Os05g0463800;Os05g0573500
HORVU.MOREX.r3.5HG0424430.898	HvPUT1	TF_motif_seq_0257	339	-	ATTGG	NF-YB;NF-YA;NF-YC	AT1G09030;AT1G17590;AT1G21970;AT1G30500;AT1G54160;AT1G54830;AT1G56170;AT1G72830;AT2G38880;AT2G47810;AT3G05690;AT3G14020;AT3G20910;AT3G53340;AT4G14540;AT5G06510;AT5G12840;AT5G27910;AT5G38140;AT5G47640;AT5G47670;AT5G50470;AT5G50480;Os01g0834400;Os02g0725900;Os05g0463800;Os05g0573500
HORVU.MOREX.r3.5HG0424430.899	HvPUT1	TF_motif_seq_0257	356	-	ATGGG	NF-YB;NF-YA;NF-YC	AT1G09030;AT1G17590;AT1G21970;AT1G30500;AT1G54160;AT1G54830;AT1G56170;AT1G72830;AT2G38880;AT2G47810;AT3G05690;AT3G14020;AT3G20910;AT3G53340;AT4G14540;AT5G06510;AT5G12840;AT5G27910;AT5G38140;AT5G47640;AT5G47670;AT5G50470;AT5G50480;Os01g0834400;Os02g0725900;Os05g0463800;Os05g0573500
HORVU.MOREX.r3.5HG0424430.900	HvPUT1	TF_motif_seq_0257	382	+	CCAAA	NF-YB;NF-YA;NF-YC	AT1G09030;AT1G17590;AT1G21970;AT1G30500;AT1G54160;AT1G54830;AT1G56170;AT1G72830;AT2G38880;AT2G47810;AT3G05690;AT3G14020;AT3G20910;AT3G53340;AT4G14540;AT5G06510;AT5G12840;AT5G27910;AT5G38140;AT5G47640;AT5G47670;AT5G50470;AT5G50480;Os01g0834400;Os02g0725900;Os05g0463800;Os05g0573500
HORVU.MOREX.r3.5HG0424430.901	HvPUT1	TF_motif_seq_0257	444	-	AATGG	NF-YB;NF-YA;NF-YC	AT1G09030;AT1G17590;AT1G21970;AT1G30500;AT1G54160;AT1G54830;AT1G56170;AT1G72830;AT2G38880;AT2G47810;AT3G05690;AT3G14020;AT3G20910;AT3G53340;AT4G14540;AT5G06510;AT5G12840;AT5G27910;AT5G38140;AT5G47640;AT5G47670;AT5G50470;AT5G50480;Os01g0834400;Os02g0725900;Os05g0463800;Os05g0573500
HORVU.MOREX.r3.5HG0424430.902	HvPUT1	TF_motif_seq_0257	464	+	CCAAA	NF-YB;NF-YA;NF-YC	AT1G09030;AT1G17590;AT1G21970;AT1G30500;AT1G54160;AT1G54830;AT1G56170;AT1G72830;AT2G38880;AT2G47810;AT3G05690;AT3G14020;AT3G20910;AT3G53340;AT4G14540;AT5G06510;AT5G12840;AT5G27910;AT5G38140;AT5G47640;AT5G47670;AT5G50470;AT5G50480;Os01g0834400;Os02g0725900;Os05g0463800;Os05g0573500
HORVU.MOREX.r3.5HG0424430.903	HvPUT1	TF_motif_seq_0257	492	+	CTAAT	NF-YB;NF-YA;NF-YC	AT1G09030;AT1G17590;AT1G21970;AT1G30500;AT1G54160;AT1G54830;AT1G56170;AT1G72830;AT2G38880;AT2G47810;AT3G05690;AT3G14020;AT3G20910;AT3G53340;AT4G14540;AT5G06510;AT5G12840;AT5G27910;AT5G38140;AT5G47640;AT5G47670;AT5G50470;AT5G50480;Os01g0834400;Os02g0725900;Os05g0463800;Os05g0573500
HORVU.MOREX.r3.5HG0424430.904	HvPUT1	TF_motif_seq_0257	494	-	AATGG	NF-YB;NF-YA;NF-YC	AT1G09030;AT1G17590;AT1G21970;AT1G30500;AT1G54160;AT1G54830;AT1G56170;AT1G72830;AT2G38880;AT2G47810;AT3G05690;AT3G14020;AT3G20910;AT3G53340;AT4G14540;AT5G06510;AT5G12840;AT5G27910;AT5G38140;AT5G47640;AT5G47670;AT5G50470;AT5G50480;Os01g0834400;Os02g0725900;Os05g0463800;Os05g0573500
HORVU.MOREX.r3.5HG0424430.905	HvPUT1	TF_motif_seq_0257	514	-	ATTAG	NF-YB;NF-YA;NF-YC	AT1G09030;AT1G17590;AT1G21970;AT1G30500;AT1G54160;AT1G54830;AT1G56170;AT1G72830;AT2G38880;AT2G47810;AT3G05690;AT3G14020;AT3G20910;AT3G53340;AT4G14540;AT5G06510;AT5G12840;AT5G27910;AT5G38140;AT5G47640;AT5G47670;AT5G50470;AT5G50480;Os01g0834400;Os02g0725900;Os05g0463800;Os05g0573500
HORVU.MOREX.r3.5HG0424430.906	HvPUT1	TF_motif_seq_0257	552	-	AATGG	NF-YB;NF-YA;NF-YC	AT1G09030;AT1G17590;AT1G21970;AT1G30500;AT1G54160;AT1G54830;AT1G56170;AT1G72830;AT2G38880;AT2G47810;AT3G05690;AT3G14020;AT3G20910;AT3G53340;AT4G14540;AT5G06510;AT5G12840;AT5G27910;AT5G38140;AT5G47640;AT5G47670;AT5G50470;AT5G50480;Os01g0834400;Os02g0725900;Os05g0463800;Os05g0573500
HORVU.MOREX.r3.5HG0424430.907	HvPUT1	TF_motif_seq_0257	553	-	ATGGG	NF-YB;NF-YA;NF-YC	AT1G09030;AT1G17590;AT1G21970;AT1G30500;AT1G54160;AT1G54830;AT1G56170;AT1G72830;AT2G38880;AT2G47810;AT3G05690;AT3G14020;AT3G20910;AT3G53340;AT4G14540;AT5G06510;AT5G12840;AT5G27910;AT5G38140;AT5G47640;AT5G47670;AT5G50470;AT5G50480;Os01g0834400;Os02g0725900;Os05g0463800;Os05g0573500
HORVU.MOREX.r3.5HG0424430.908	HvPUT1	TF_motif_seq_0257	580	-	ACTGG	NF-YB;NF-YA;NF-YC	AT1G09030;AT1G17590;AT1G21970;AT1G30500;AT1G54160;AT1G54830;AT1G56170;AT1G72830;AT2G38880;AT2G47810;AT3G05690;AT3G14020;AT3G20910;AT3G53340;AT4G14540;AT5G06510;AT5G12840;AT5G27910;AT5G38140;AT5G47640;AT5G47670;AT5G50470;AT5G50480;Os01g0834400;Os02g0725900;Os05g0463800;Os05g0573500
HORVU.MOREX.r3.5HG0424430.909	HvPUT1	TF_motif_seq_0257	617	-	ATTTG	NF-YB;NF-YA;NF-YC	AT1G09030;AT1G17590;AT1G21970;AT1G30500;AT1G54160;AT1G54830;AT1G56170;AT1G72830;AT2G38880;AT2G47810;AT3G05690;AT3G14020;AT3G20910;AT3G53340;AT4G14540;AT5G06510;AT5G12840;AT5G27910;AT5G38140;AT5G47640;AT5G47670;AT5G50470;AT5G50480;Os01g0834400;Os02g0725900;Os05g0463800;Os05g0573500
HORVU.MOREX.r3.5HG0424430.910	HvPUT1	TF_motif_seq_0257	632	+	ACAAT	NF-YB;NF-YA;NF-YC	AT1G09030;AT1G17590;AT1G21970;AT1G30500;AT1G54160;AT1G54830;AT1G56170;AT1G72830;AT2G38880;AT2G47810;AT3G05690;AT3G14020;AT3G20910;AT3G53340;AT4G14540;AT5G06510;AT5G12840;AT5G27910;AT5G38140;AT5G47640;AT5G47670;AT5G50470;AT5G50480;Os01g0834400;Os02g0725900;Os05g0463800;Os05g0573500
HORVU.MOREX.r3.5HG0424430.911	HvPUT1	TF_motif_seq_0257	648	-	ATTTG	NF-YB;NF-YA;NF-YC	AT1G09030;AT1G17590;AT1G21970;AT1G30500;AT1G54160;AT1G54830;AT1G56170;AT1G72830;AT2G38880;AT2G47810;AT3G05690;AT3G14020;AT3G20910;AT3G53340;AT4G14540;AT5G06510;AT5G12840;AT5G27910;AT5G38140;AT5G47640;AT5G47670;AT5G50470;AT5G50480;Os01g0834400;Os02g0725900;Os05g0463800;Os05g0573500
HORVU.MOREX.r3.5HG0424430.912	HvPUT1	TF_motif_seq_0257	658	-	ATTTG	NF-YB;NF-YA;NF-YC	AT1G09030;AT1G17590;AT1G21970;AT1G30500;AT1G54160;AT1G54830;AT1G56170;AT1G72830;AT2G38880;AT2G47810;AT3G05690;AT3G14020;AT3G20910;AT3G53340;AT4G14540;AT5G06510;AT5G12840;AT5G27910;AT5G38140;AT5G47640;AT5G47670;AT5G50470;AT5G50480;Os01g0834400;Os02g0725900;Os05g0463800;Os05g0573500
HORVU.MOREX.r3.5HG0424430.913	HvPUT1	TF_motif_seq_0257	659	-	TTTGG	NF-YB;NF-YA;NF-YC	AT1G09030;AT1G17590;AT1G21970;AT1G30500;AT1G54160;AT1G54830;AT1G56170;AT1G72830;AT2G38880;AT2G47810;AT3G05690;AT3G14020;AT3G20910;AT3G53340;AT4G14540;AT5G06510;AT5G12840;AT5G27910;AT5G38140;AT5G47640;AT5G47670;AT5G50470;AT5G50480;Os01g0834400;Os02g0725900;Os05g0463800;Os05g0573500
HORVU.MOREX.r3.5HG0424430.914	HvPUT1	TF_motif_seq_0257	667	+	CAAAT	NF-YB;NF-YA;NF-YC	AT1G09030;AT1G17590;AT1G21970;AT1G30500;AT1G54160;AT1G54830;AT1G56170;AT1G72830;AT2G38880;AT2G47810;AT3G05690;AT3G14020;AT3G20910;AT3G53340;AT4G14540;AT5G06510;AT5G12840;AT5G27910;AT5G38140;AT5G47640;AT5G47670;AT5G50470;AT5G50480;Os01g0834400;Os02g0725900;Os05g0463800;Os05g0573500
HORVU.MOREX.r3.5HG0424430.915	HvPUT1	TF_motif_seq_0257	787	+	CCAAA	NF-YB;NF-YA;NF-YC	AT1G09030;AT1G17590;AT1G21970;AT1G30500;AT1G54160;AT1G54830;AT1G56170;AT1G72830;AT2G38880;AT2G47810;AT3G05690;AT3G14020;AT3G20910;AT3G53340;AT4G14540;AT5G06510;AT5G12840;AT5G27910;AT5G38140;AT5G47640;AT5G47670;AT5G50470;AT5G50480;Os01g0834400;Os02g0725900;Os05g0463800;Os05g0573500
HORVU.MOREX.r3.5HG0424430.916	HvPUT1	TF_motif_seq_0257	811	+	CCGAT	NF-YB;NF-YA;NF-YC	AT1G09030;AT1G17590;AT1G21970;AT1G30500;AT1G54160;AT1G54830;AT1G56170;AT1G72830;AT2G38880;AT2G47810;AT3G05690;AT3G14020;AT3G20910;AT3G53340;AT4G14540;AT5G06510;AT5G12840;AT5G27910;AT5G38140;AT5G47640;AT5G47670;AT5G50470;AT5G50480;Os01g0834400;Os02g0725900;Os05g0463800;Os05g0573500
HORVU.MOREX.r3.5HG0424430.917	HvPUT1	TF_motif_seq_0257	814	-	ATTTG	NF-YB;NF-YA;NF-YC	AT1G09030;AT1G17590;AT1G21970;AT1G30500;AT1G54160;AT1G54830;AT1G56170;AT1G72830;AT2G38880;AT2G47810;AT3G05690;AT3G14020;AT3G20910;AT3G53340;AT4G14540;AT5G06510;AT5G12840;AT5G27910;AT5G38140;AT5G47640;AT5G47670;AT5G50470;AT5G50480;Os01g0834400;Os02g0725900;Os05g0463800;Os05g0573500
HORVU.MOREX.r3.5HG0424430.918	HvPUT1	TF_motif_seq_0257	818	-	GTTGG	NF-YB;NF-YA;NF-YC	AT1G09030;AT1G17590;AT1G21970;AT1G30500;AT1G54160;AT1G54830;AT1G56170;AT1G72830;AT2G38880;AT2G47810;AT3G05690;AT3G14020;AT3G20910;AT3G53340;AT4G14540;AT5G06510;AT5G12840;AT5G27910;AT5G38140;AT5G47640;AT5G47670;AT5G50470;AT5G50480;Os01g0834400;Os02g0725900;Os05g0463800;Os05g0573500
HORVU.MOREX.r3.5HG0424430.919	HvPUT1	TF_motif_seq_0257	826	-	ATTTG	NF-YB;NF-YA;NF-YC	AT1G09030;AT1G17590;AT1G21970;AT1G30500;AT1G54160;AT1G54830;AT1G56170;AT1G72830;AT2G38880;AT2G47810;AT3G05690;AT3G14020;AT3G20910;AT3G53340;AT4G14540;AT5G06510;AT5G12840;AT5G27910;AT5G38140;AT5G47640;AT5G47670;AT5G50470;AT5G50480;Os01g0834400;Os02g0725900;Os05g0463800;Os05g0573500
HORVU.MOREX.r3.5HG0424430.920	HvPUT1	TF_motif_seq_0257	827	-	TTTGG	NF-YB;NF-YA;NF-YC	AT1G09030;AT1G17590;AT1G21970;AT1G30500;AT1G54160;AT1G54830;AT1G56170;AT1G72830;AT2G38880;AT2G47810;AT3G05690;AT3G14020;AT3G20910;AT3G53340;AT4G14540;AT5G06510;AT5G12840;AT5G27910;AT5G38140;AT5G47640;AT5G47670;AT5G50470;AT5G50480;Os01g0834400;Os02g0725900;Os05g0463800;Os05g0573500
HORVU.MOREX.r3.5HG0424430.921	HvPUT1	TF_motif_seq_0257	842	-	TTTGG	NF-YB;NF-YA;NF-YC	AT1G09030;AT1G17590;AT1G21970;AT1G30500;AT1G54160;AT1G54830;AT1G56170;AT1G72830;AT2G38880;AT2G47810;AT3G05690;AT3G14020;AT3G20910;AT3G53340;AT4G14540;AT5G06510;AT5G12840;AT5G27910;AT5G38140;AT5G47640;AT5G47670;AT5G50470;AT5G50480;Os01g0834400;Os02g0725900;Os05g0463800;Os05g0573500
HORVU.MOREX.r3.5HG0424430.922	HvPUT1	TF_motif_seq_0257	895	-	TTTGG	NF-YB;NF-YA;NF-YC	AT1G09030;AT1G17590;AT1G21970;AT1G30500;AT1G54160;AT1G54830;AT1G56170;AT1G72830;AT2G38880;AT2G47810;AT3G05690;AT3G14020;AT3G20910;AT3G53340;AT4G14540;AT5G06510;AT5G12840;AT5G27910;AT5G38140;AT5G47640;AT5G47670;AT5G50470;AT5G50480;Os01g0834400;Os02g0725900;Os05g0463800;Os05g0573500
HORVU.MOREX.r3.5HG0424430.923	HvPUT1	TF_motif_seq_0257	928	+	CCAAT	NF-YB;NF-YA;NF-YC	AT1G09030;AT1G17590;AT1G21970;AT1G30500;AT1G54160;AT1G54830;AT1G56170;AT1G72830;AT2G38880;AT2G47810;AT3G05690;AT3G14020;AT3G20910;AT3G53340;AT4G14540;AT5G06510;AT5G12840;AT5G27910;AT5G38140;AT5G47640;AT5G47670;AT5G50470;AT5G50480;Os01g0834400;Os02g0725900;Os05g0463800;Os05g0573500
HORVU.MOREX.r3.5HG0424430.924	HvPUT1	TF_motif_seq_0257	944	+	CCCAT	NF-YB;NF-YA;NF-YC	AT1G09030;AT1G17590;AT1G21970;AT1G30500;AT1G54160;AT1G54830;AT1G56170;AT1G72830;AT2G38880;AT2G47810;AT3G05690;AT3G14020;AT3G20910;AT3G53340;AT4G14540;AT5G06510;AT5G12840;AT5G27910;AT5G38140;AT5G47640;AT5G47670;AT5G50470;AT5G50480;Os01g0834400;Os02g0725900;Os05g0463800;Os05g0573500
HORVU.MOREX.r3.5HG0424430.925	HvPUT1	TF_motif_seq_0257	1067	+	CGAAT	NF-YB;NF-YA;NF-YC	AT1G09030;AT1G17590;AT1G21970;AT1G30500;AT1G54160;AT1G54830;AT1G56170;AT1G72830;AT2G38880;AT2G47810;AT3G05690;AT3G14020;AT3G20910;AT3G53340;AT4G14540;AT5G06510;AT5G12840;AT5G27910;AT5G38140;AT5G47640;AT5G47670;AT5G50470;AT5G50480;Os01g0834400;Os02g0725900;Os05g0463800;Os05g0573500
HORVU.MOREX.r3.5HG0424430.926	HvPUT1	TF_motif_seq_0257	1129	+	ACAAT	NF-YB;NF-YA;NF-YC	AT1G09030;AT1G17590;AT1G21970;AT1G30500;AT1G54160;AT1G54830;AT1G56170;AT1G72830;AT2G38880;AT2G47810;AT3G05690;AT3G14020;AT3G20910;AT3G53340;AT4G14540;AT5G06510;AT5G12840;AT5G27910;AT5G38140;AT5G47640;AT5G47670;AT5G50470;AT5G50480;Os01g0834400;Os02g0725900;Os05g0463800;Os05g0573500
HORVU.MOREX.r3.5HG0424430.927	HvPUT1	TF_motif_seq_0257	1134	+	CCAAA	NF-YB;NF-YA;NF-YC	AT1G09030;AT1G17590;AT1G21970;AT1G30500;AT1G54160;AT1G54830;AT1G56170;AT1G72830;AT2G38880;AT2G47810;AT3G05690;AT3G14020;AT3G20910;AT3G53340;AT4G14540;AT5G06510;AT5G12840;AT5G27910;AT5G38140;AT5G47640;AT5G47670;AT5G50470;AT5G50480;Os01g0834400;Os02g0725900;Os05g0463800;Os05g0573500
HORVU.MOREX.r3.5HG0424430.928	HvPUT1	TF_motif_seq_0257	1135	+	CAAAT	NF-YB;NF-YA;NF-YC	AT1G09030;AT1G17590;AT1G21970;AT1G30500;AT1G54160;AT1G54830;AT1G56170;AT1G72830;AT2G38880;AT2G47810;AT3G05690;AT3G14020;AT3G20910;AT3G53340;AT4G14540;AT5G06510;AT5G12840;AT5G27910;AT5G38140;AT5G47640;AT5G47670;AT5G50470;AT5G50480;Os01g0834400;Os02g0725900;Os05g0463800;Os05g0573500
HORVU.MOREX.r3.5HG0424430.929	HvPUT1	TF_motif_seq_0257	1166	-	ATTGA	NF-YB;NF-YA;NF-YC	AT1G09030;AT1G17590;AT1G21970;AT1G30500;AT1G54160;AT1G54830;AT1G56170;AT1G72830;AT2G38880;AT2G47810;AT3G05690;AT3G14020;AT3G20910;AT3G53340;AT4G14540;AT5G06510;AT5G12840;AT5G27910;AT5G38140;AT5G47640;AT5G47670;AT5G50470;AT5G50480;Os01g0834400;Os02g0725900;Os05g0463800;Os05g0573500
HORVU.MOREX.r3.5HG0424430.930	HvPUT1	TF_motif_seq_0257	1184	-	TTTGG	NF-YB;NF-YA;NF-YC	AT1G09030;AT1G17590;AT1G21970;AT1G30500;AT1G54160;AT1G54830;AT1G56170;AT1G72830;AT2G38880;AT2G47810;AT3G05690;AT3G14020;AT3G20910;AT3G53340;AT4G14540;AT5G06510;AT5G12840;AT5G27910;AT5G38140;AT5G47640;AT5G47670;AT5G50470;AT5G50480;Os01g0834400;Os02g0725900;Os05g0463800;Os05g0573500
HORVU.MOREX.r3.5HG0424430.931	HvPUT1	TF_motif_seq_0257	1266	+	TCAAT	NF-YB;NF-YA;NF-YC	AT1G09030;AT1G17590;AT1G21970;AT1G30500;AT1G54160;AT1G54830;AT1G56170;AT1G72830;AT2G38880;AT2G47810;AT3G05690;AT3G14020;AT3G20910;AT3G53340;AT4G14540;AT5G06510;AT5G12840;AT5G27910;AT5G38140;AT5G47640;AT5G47670;AT5G50470;AT5G50480;Os01g0834400;Os02g0725900;Os05g0463800;Os05g0573500
HORVU.MOREX.r3.5HG0424430.932	HvPUT1	TF_motif_seq_0257	1287	+	CCAAA	NF-YB;NF-YA;NF-YC	AT1G09030;AT1G17590;AT1G21970;AT1G30500;AT1G54160;AT1G54830;AT1G56170;AT1G72830;AT2G38880;AT2G47810;AT3G05690;AT3G14020;AT3G20910;AT3G53340;AT4G14540;AT5G06510;AT5G12840;AT5G27910;AT5G38140;AT5G47640;AT5G47670;AT5G50470;AT5G50480;Os01g0834400;Os02g0725900;Os05g0463800;Os05g0573500
HORVU.MOREX.r3.5HG0424430.933	HvPUT1	TF_motif_seq_0257	1360	+	ACAAT	NF-YB;NF-YA;NF-YC	AT1G09030;AT1G17590;AT1G21970;AT1G30500;AT1G54160;AT1G54830;AT1G56170;AT1G72830;AT2G38880;AT2G47810;AT3G05690;AT3G14020;AT3G20910;AT3G53340;AT4G14540;AT5G06510;AT5G12840;AT5G27910;AT5G38140;AT5G47640;AT5G47670;AT5G50470;AT5G50480;Os01g0834400;Os02g0725900;Os05g0463800;Os05g0573500
HORVU.MOREX.r3.5HG0424430.934	HvPUT1	TF_motif_seq_0257	1368	+	CCAAA	NF-YB;NF-YA;NF-YC	AT1G09030;AT1G17590;AT1G21970;AT1G30500;AT1G54160;AT1G54830;AT1G56170;AT1G72830;AT2G38880;AT2G47810;AT3G05690;AT3G14020;AT3G20910;AT3G53340;AT4G14540;AT5G06510;AT5G12840;AT5G27910;AT5G38140;AT5G47640;AT5G47670;AT5G50470;AT5G50480;Os01g0834400;Os02g0725900;Os05g0463800;Os05g0573500
HORVU.MOREX.r3.5HG0424430.935	HvPUT1	TF_motif_seq_0257	1373	+	CAAAT	NF-YB;NF-YA;NF-YC	AT1G09030;AT1G17590;AT1G21970;AT1G30500;AT1G54160;AT1G54830;AT1G56170;AT1G72830;AT2G38880;AT2G47810;AT3G05690;AT3G14020;AT3G20910;AT3G53340;AT4G14540;AT5G06510;AT5G12840;AT5G27910;AT5G38140;AT5G47640;AT5G47670;AT5G50470;AT5G50480;Os01g0834400;Os02g0725900;Os05g0463800;Os05g0573500
HORVU.MOREX.r3.5HG0424430.936	HvPUT1	TF_motif_seq_0257	1409	+	CCAAT	NF-YB;NF-YA;NF-YC	AT1G09030;AT1G17590;AT1G21970;AT1G30500;AT1G54160;AT1G54830;AT1G56170;AT1G72830;AT2G38880;AT2G47810;AT3G05690;AT3G14020;AT3G20910;AT3G53340;AT4G14540;AT5G06510;AT5G12840;AT5G27910;AT5G38140;AT5G47640;AT5G47670;AT5G50470;AT5G50480;Os01g0834400;Os02g0725900;Os05g0463800;Os05g0573500
HORVU.MOREX.r3.5HG0424430.937	HvPUT1	TF_motif_seq_0257	1414	+	CCAGT	NF-YB;NF-YA;NF-YC	AT1G09030;AT1G17590;AT1G21970;AT1G30500;AT1G54160;AT1G54830;AT1G56170;AT1G72830;AT2G38880;AT2G47810;AT3G05690;AT3G14020;AT3G20910;AT3G53340;AT4G14540;AT5G06510;AT5G12840;AT5G27910;AT5G38140;AT5G47640;AT5G47670;AT5G50470;AT5G50480;Os01g0834400;Os02g0725900;Os05g0463800;Os05g0573500
HORVU.MOREX.r3.5HG0424430.938	HvPUT1	TF_motif_seq_0257	1445	+	CCATT	NF-YB;NF-YA;NF-YC	AT1G09030;AT1G17590;AT1G21970;AT1G30500;AT1G54160;AT1G54830;AT1G56170;AT1G72830;AT2G38880;AT2G47810;AT3G05690;AT3G14020;AT3G20910;AT3G53340;AT4G14540;AT5G06510;AT5G12840;AT5G27910;AT5G38140;AT5G47640;AT5G47670;AT5G50470;AT5G50480;Os01g0834400;Os02g0725900;Os05g0463800;Os05g0573500
HORVU.MOREX.r3.5HG0424430.939	HvPUT1	TF_motif_seq_0257	1485	-	ACTGG	NF-YB;NF-YA;NF-YC	AT1G09030;AT1G17590;AT1G21970;AT1G30500;AT1G54160;AT1G54830;AT1G56170;AT1G72830;AT2G38880;AT2G47810;AT3G05690;AT3G14020;AT3G20910;AT3G53340;AT4G14540;AT5G06510;AT5G12840;AT5G27910;AT5G38140;AT5G47640;AT5G47670;AT5G50470;AT5G50480;Os01g0834400;Os02g0725900;Os05g0463800;Os05g0573500
HORVU.MOREX.r3.5HG0424430.940	HvPUT1	TF_motif_seq_0258	30	-	GTCCG	Dehydrin	U01377
HORVU.MOREX.r3.5HG0424430.941	HvPUT1	TF_motif_seq_0258	32	+	CCGAT	Dehydrin	U01377
HORVU.MOREX.r3.5HG0424430.942	HvPUT1	TF_motif_seq_0258	69	+	CCGCC	Dehydrin	U01377
HORVU.MOREX.r3.5HG0424430.943	HvPUT1	TF_motif_seq_0258	72	+	CCGTC	Dehydrin	U01377
HORVU.MOREX.r3.5HG0424430.944	HvPUT1	TF_motif_seq_0258	74	-	GTCTG	Dehydrin	U01377
HORVU.MOREX.r3.5HG0424430.945	HvPUT1	TF_motif_seq_0258	94	-	GTCAG	Dehydrin	U01377
HORVU.MOREX.r3.5HG0424430.946	HvPUT1	TF_motif_seq_0258	136	+	CCGTC	Dehydrin	U01377
HORVU.MOREX.r3.5HG0424430.947	HvPUT1	TF_motif_seq_0258	145	+	ACGAC	Dehydrin	U01377
HORVU.MOREX.r3.5HG0424430.948	HvPUT1	TF_motif_seq_0258	174	+	CCAAC	Dehydrin	U01377
HORVU.MOREX.r3.5HG0424430.949	HvPUT1	TF_motif_seq_0258	188	-	GTCTG	Dehydrin	U01377
HORVU.MOREX.r3.5HG0424430.950	HvPUT1	TF_motif_seq_0258	245	+	GCGAC	Dehydrin	U01377
HORVU.MOREX.r3.5HG0424430.951	HvPUT1	TF_motif_seq_0258	247	-	GACGG	Dehydrin	U01377
HORVU.MOREX.r3.5HG0424430.952	HvPUT1	TF_motif_seq_0258	251	-	GGCGG	Dehydrin	U01377
HORVU.MOREX.r3.5HG0424430.953	HvPUT1	TF_motif_seq_0258	263	+	TCGAC	Dehydrin	U01377
HORVU.MOREX.r3.5HG0424430.954	HvPUT1	TF_motif_seq_0258	330	-	ATCGG	Dehydrin	U01377
HORVU.MOREX.r3.5HG0424430.955	HvPUT1	TF_motif_seq_0258	448	-	GACGG	Dehydrin	U01377
HORVU.MOREX.r3.5HG0424430.956	HvPUT1	TF_motif_seq_0258	459	+	ACGAC	Dehydrin	U01377
HORVU.MOREX.r3.5HG0424430.957	HvPUT1	TF_motif_seq_0258	575	+	CTGAC	Dehydrin	U01377
HORVU.MOREX.r3.5HG0424430.958	HvPUT1	TF_motif_seq_0258	587	+	CCCAC	Dehydrin	U01377
HORVU.MOREX.r3.5HG0424430.959	HvPUT1	TF_motif_seq_0258	605	+	ACGAC	Dehydrin	U01377
HORVU.MOREX.r3.5HG0424430.960	HvPUT1	TF_motif_seq_0258	751	-	GTAGG	Dehydrin	U01377
HORVU.MOREX.r3.5HG0424430.961	HvPUT1	TF_motif_seq_0258	757	-	GTGGG	Dehydrin	U01377
HORVU.MOREX.r3.5HG0424430.962	HvPUT1	TF_motif_seq_0258	772	+	CCGAA	Dehydrin	U01377
HORVU.MOREX.r3.5HG0424430.963	HvPUT1	TF_motif_seq_0258	779	+	CCGAA	Dehydrin	U01377
HORVU.MOREX.r3.5HG0424430.964	HvPUT1	TF_motif_seq_0258	792	+	CCGAA	Dehydrin	U01377
HORVU.MOREX.r3.5HG0424430.965	HvPUT1	TF_motif_seq_0258	797	+	CCGAA	Dehydrin	U01377
HORVU.MOREX.r3.5HG0424430.966	HvPUT1	TF_motif_seq_0258	811	+	CCGAT	Dehydrin	U01377
HORVU.MOREX.r3.5HG0424430.967	HvPUT1	TF_motif_seq_0258	818	-	GTTGG	Dehydrin	U01377
HORVU.MOREX.r3.5HG0424430.968	HvPUT1	TF_motif_seq_0258	846	-	GTCCG	Dehydrin	U01377
HORVU.MOREX.r3.5HG0424430.969	HvPUT1	TF_motif_seq_0258	851	-	GTGGG	Dehydrin	U01377
HORVU.MOREX.r3.5HG0424430.970	HvPUT1	TF_motif_seq_0258	888	-	TTCGG	Dehydrin	U01377
HORVU.MOREX.r3.5HG0424430.971	HvPUT1	TF_motif_seq_0258	919	+	CCGAA	Dehydrin	U01377
HORVU.MOREX.r3.5HG0424430.972	HvPUT1	TF_motif_seq_0258	935	-	GTGGG	Dehydrin	U01377
HORVU.MOREX.r3.5HG0424430.973	HvPUT1	TF_motif_seq_0258	1056	-	GTCTG	Dehydrin	U01377
HORVU.MOREX.r3.5HG0424430.974	HvPUT1	TF_motif_seq_0258	1066	+	CCGAA	Dehydrin	U01377
HORVU.MOREX.r3.5HG0424430.975	HvPUT1	TF_motif_seq_0258	1192	-	TTCGG	Dehydrin	U01377
HORVU.MOREX.r3.5HG0424430.976	HvPUT1	TF_motif_seq_0258	1201	+	CCGAA	Dehydrin	U01377
HORVU.MOREX.r3.5HG0424430.977	HvPUT1	TF_motif_seq_0258	1210	+	CCGAA	Dehydrin	U01377
HORVU.MOREX.r3.5HG0424430.978	HvPUT1	TF_motif_seq_0258	1238	-	TTCGG	Dehydrin	U01377
HORVU.MOREX.r3.5HG0424430.979	HvPUT1	TF_motif_seq_0258	1312	+	CCGAA	Dehydrin	U01377
HORVU.MOREX.r3.5HG0424430.980	HvPUT1	TF_motif_seq_0258	1335	+	CCGAA	Dehydrin	U01377
HORVU.MOREX.r3.5HG0424430.981	HvPUT1	TF_motif_seq_0258	1348	+	CCTAC	Dehydrin	U01377
HORVU.MOREX.r3.5HG0424430.982	HvPUT1	TF_motif_seq_0258	1480	-	GACGG	Dehydrin	U01377
HORVU.MOREX.r3.5HG0424430.983	HvPUT1	TF_motif_seq_0258	1482	+	CGGAC	Dehydrin	U01377
HORVU.MOREX.r3.5HG0424430.984	HvPUT1	TF_motif_seq_0266	13	+	GGAGC	TCP	Os03g0785800;Os04g0194600;Os12g0616400;Os01g0213800;Os08g0544800;Os11g0175700
HORVU.MOREX.r3.5HG0424430.985	HvPUT1	TF_motif_seq_0266	13	-	GGAGC	TCP	Os03g0785800;Os04g0194600;Os12g0616400;Os01g0213800;Os08g0544800;Os11g0175700
HORVU.MOREX.r3.5HG0424430.986	HvPUT1	TF_motif_seq_0266	29	+	GGTCC	TCP	Os03g0785800;Os04g0194600;Os12g0616400;Os01g0213800;Os08g0544800;Os11g0175700
HORVU.MOREX.r3.5HG0424430.987	HvPUT1	TF_motif_seq_0266	29	-	GGTCC	TCP	Os03g0785800;Os04g0194600;Os12g0616400;Os01g0213800;Os08g0544800;Os11g0175700
HORVU.MOREX.r3.5HG0424430.988	HvPUT1	TF_motif_seq_0266	93	+	GGTCA	TCP	Os03g0785800;Os04g0194600;Os12g0616400;Os01g0213800;Os08g0544800;Os11g0175700
HORVU.MOREX.r3.5HG0424430.989	HvPUT1	TF_motif_seq_0266	93	-	GGTCA	TCP	Os03g0785800;Os04g0194600;Os12g0616400;Os01g0213800;Os08g0544800;Os11g0175700
HORVU.MOREX.r3.5HG0424430.990	HvPUT1	TF_motif_seq_0266	97	+	AGTCC	TCP	Os03g0785800;Os04g0194600;Os12g0616400;Os01g0213800;Os08g0544800;Os11g0175700
HORVU.MOREX.r3.5HG0424430.991	HvPUT1	TF_motif_seq_0266	97	-	AGTCC	TCP	Os03g0785800;Os04g0194600;Os12g0616400;Os01g0213800;Os08g0544800;Os11g0175700
HORVU.MOREX.r3.5HG0424430.992	HvPUT1	TF_motif_seq_0266	133	+	CGCCC	TCP	Os03g0785800;Os04g0194600;Os12g0616400;Os01g0213800;Os08g0544800;Os11g0175700
HORVU.MOREX.r3.5HG0424430.993	HvPUT1	TF_motif_seq_0266	133	-	CGCCC	TCP	Os03g0785800;Os04g0194600;Os12g0616400;Os01g0213800;Os08g0544800;Os11g0175700
HORVU.MOREX.r3.5HG0424430.994	HvPUT1	TF_motif_seq_0266	137	+	CGTCC	TCP	Os03g0785800;Os04g0194600;Os12g0616400;Os01g0213800;Os08g0544800;Os11g0175700
HORVU.MOREX.r3.5HG0424430.995	HvPUT1	TF_motif_seq_0266	137	-	CGTCC	TCP	Os03g0785800;Os04g0194600;Os12g0616400;Os01g0213800;Os08g0544800;Os11g0175700
HORVU.MOREX.r3.5HG0424430.996	HvPUT1	TF_motif_seq_0266	138	+	GTCCC	TCP	Os03g0785800;Os04g0194600;Os12g0616400;Os01g0213800;Os08g0544800;Os11g0175700
HORVU.MOREX.r3.5HG0424430.997	HvPUT1	TF_motif_seq_0266	138	-	GTCCC	TCP	Os03g0785800;Os04g0194600;Os12g0616400;Os01g0213800;Os08g0544800;Os11g0175700
HORVU.MOREX.r3.5HG0424430.998	HvPUT1	TF_motif_seq_0266	171	+	TGCCC	TCP	Os03g0785800;Os04g0194600;Os12g0616400;Os01g0213800;Os08g0544800;Os11g0175700
HORVU.MOREX.r3.5HG0424430.999	HvPUT1	TF_motif_seq_0266	171	-	TGCCC	TCP	Os03g0785800;Os04g0194600;Os12g0616400;Os01g0213800;Os08g0544800;Os11g0175700
HORVU.MOREX.r3.5HG0424430.1000	HvPUT1	TF_motif_seq_0266	206	+	GGTGC	TCP	Os03g0785800;Os04g0194600;Os12g0616400;Os01g0213800;Os08g0544800;Os11g0175700
HORVU.MOREX.r3.5HG0424430.1001	HvPUT1	TF_motif_seq_0266	206	-	GGTGC	TCP	Os03g0785800;Os04g0194600;Os12g0616400;Os01g0213800;Os08g0544800;Os11g0175700
HORVU.MOREX.r3.5HG0424430.1002	HvPUT1	TF_motif_seq_0266	207	+	GTGCC	TCP	Os03g0785800;Os04g0194600;Os12g0616400;Os01g0213800;Os08g0544800;Os11g0175700
HORVU.MOREX.r3.5HG0424430.1003	HvPUT1	TF_motif_seq_0266	207	-	GTGCC	TCP	Os03g0785800;Os04g0194600;Os12g0616400;Os01g0213800;Os08g0544800;Os11g0175700
HORVU.MOREX.r3.5HG0424430.1004	HvPUT1	TF_motif_seq_0266	221	+	GGATC	TCP	Os03g0785800;Os04g0194600;Os12g0616400;Os01g0213800;Os08g0544800;Os11g0175700
HORVU.MOREX.r3.5HG0424430.1005	HvPUT1	TF_motif_seq_0266	221	-	GGATC	TCP	Os03g0785800;Os04g0194600;Os12g0616400;Os01g0213800;Os08g0544800;Os11g0175700
HORVU.MOREX.r3.5HG0424430.1006	HvPUT1	TF_motif_seq_0266	243	+	GGGCG	TCP	Os03g0785800;Os04g0194600;Os12g0616400;Os01g0213800;Os08g0544800;Os11g0175700
HORVU.MOREX.r3.5HG0424430.1007	HvPUT1	TF_motif_seq_0266	243	-	GGGCG	TCP	Os03g0785800;Os04g0194600;Os12g0616400;Os01g0213800;Os08g0544800;Os11g0175700
HORVU.MOREX.r3.5HG0424430.1008	HvPUT1	TF_motif_seq_0266	250	+	GGGCG	TCP	Os03g0785800;Os04g0194600;Os12g0616400;Os01g0213800;Os08g0544800;Os11g0175700
HORVU.MOREX.r3.5HG0424430.1009	HvPUT1	TF_motif_seq_0266	250	-	GGGCG	TCP	Os03g0785800;Os04g0194600;Os12g0616400;Os01g0213800;Os08g0544800;Os11g0175700
HORVU.MOREX.r3.5HG0424430.1010	HvPUT1	TF_motif_seq_0266	264	+	CGACC	TCP	Os03g0785800;Os04g0194600;Os12g0616400;Os01g0213800;Os08g0544800;Os11g0175700
HORVU.MOREX.r3.5HG0424430.1011	HvPUT1	TF_motif_seq_0266	264	-	CGACC	TCP	Os03g0785800;Os04g0194600;Os12g0616400;Os01g0213800;Os08g0544800;Os11g0175700
HORVU.MOREX.r3.5HG0424430.1012	HvPUT1	TF_motif_seq_0266	324	+	GGAGC	TCP	Os03g0785800;Os04g0194600;Os12g0616400;Os01g0213800;Os08g0544800;Os11g0175700
HORVU.MOREX.r3.5HG0424430.1013	HvPUT1	TF_motif_seq_0266	324	-	GGAGC	TCP	Os03g0785800;Os04g0194600;Os12g0616400;Os01g0213800;Os08g0544800;Os11g0175700
HORVU.MOREX.r3.5HG0424430.1014	HvPUT1	TF_motif_seq_0266	332	+	CGGCC	TCP	Os03g0785800;Os04g0194600;Os12g0616400;Os01g0213800;Os08g0544800;Os11g0175700
HORVU.MOREX.r3.5HG0424430.1015	HvPUT1	TF_motif_seq_0266	332	-	CGGCC	TCP	Os03g0785800;Os04g0194600;Os12g0616400;Os01g0213800;Os08g0544800;Os11g0175700
HORVU.MOREX.r3.5HG0424430.1016	HvPUT1	TF_motif_seq_0266	333	+	GGCCT	TCP	Os03g0785800;Os04g0194600;Os12g0616400;Os01g0213800;Os08g0544800;Os11g0175700
HORVU.MOREX.r3.5HG0424430.1017	HvPUT1	TF_motif_seq_0266	333	-	GGCCT	TCP	Os03g0785800;Os04g0194600;Os12g0616400;Os01g0213800;Os08g0544800;Os11g0175700
HORVU.MOREX.r3.5HG0424430.1018	HvPUT1	TF_motif_seq_0266	342	+	GGGCT	TCP	Os03g0785800;Os04g0194600;Os12g0616400;Os01g0213800;Os08g0544800;Os11g0175700
HORVU.MOREX.r3.5HG0424430.1019	HvPUT1	TF_motif_seq_0266	342	-	GGGCT	TCP	Os03g0785800;Os04g0194600;Os12g0616400;Os01g0213800;Os08g0544800;Os11g0175700
HORVU.MOREX.r3.5HG0424430.1020	HvPUT1	TF_motif_seq_0266	358	+	GGGGC	TCP	Os03g0785800;Os04g0194600;Os12g0616400;Os01g0213800;Os08g0544800;Os11g0175700
HORVU.MOREX.r3.5HG0424430.1021	HvPUT1	TF_motif_seq_0266	358	-	GGGGC	TCP	Os03g0785800;Os04g0194600;Os12g0616400;Os01g0213800;Os08g0544800;Os11g0175700
HORVU.MOREX.r3.5HG0424430.1022	HvPUT1	TF_motif_seq_0266	359	+	GGGCC	TCP	Os03g0785800;Os04g0194600;Os12g0616400;Os01g0213800;Os08g0544800;Os11g0175700
HORVU.MOREX.r3.5HG0424430.1023	HvPUT1	TF_motif_seq_0266	359	-	GGGCC	TCP	Os03g0785800;Os04g0194600;Os12g0616400;Os01g0213800;Os08g0544800;Os11g0175700
HORVU.MOREX.r3.5HG0424430.1024	HvPUT1	TF_motif_seq_0266	360	+	GGCCT	TCP	Os03g0785800;Os04g0194600;Os12g0616400;Os01g0213800;Os08g0544800;Os11g0175700
HORVU.MOREX.r3.5HG0424430.1025	HvPUT1	TF_motif_seq_0266	360	-	GGCCT	TCP	Os03g0785800;Os04g0194600;Os12g0616400;Os01g0213800;Os08g0544800;Os11g0175700
HORVU.MOREX.r3.5HG0424430.1026	HvPUT1	TF_motif_seq_0266	369	+	GCACC	TCP	Os03g0785800;Os04g0194600;Os12g0616400;Os01g0213800;Os08g0544800;Os11g0175700
HORVU.MOREX.r3.5HG0424430.1027	HvPUT1	TF_motif_seq_0266	369	-	GCACC	TCP	Os03g0785800;Os04g0194600;Os12g0616400;Os01g0213800;Os08g0544800;Os11g0175700
HORVU.MOREX.r3.5HG0424430.1028	HvPUT1	TF_motif_seq_0266	378	+	GGCTC	TCP	Os03g0785800;Os04g0194600;Os12g0616400;Os01g0213800;Os08g0544800;Os11g0175700
HORVU.MOREX.r3.5HG0424430.1029	HvPUT1	TF_motif_seq_0266	378	-	GGCTC	TCP	Os03g0785800;Os04g0194600;Os12g0616400;Os01g0213800;Os08g0544800;Os11g0175700
HORVU.MOREX.r3.5HG0424430.1030	HvPUT1	TF_motif_seq_0266	379	+	GCTCC	TCP	Os03g0785800;Os04g0194600;Os12g0616400;Os01g0213800;Os08g0544800;Os11g0175700
HORVU.MOREX.r3.5HG0424430.1031	HvPUT1	TF_motif_seq_0266	379	-	GCTCC	TCP	Os03g0785800;Os04g0194600;Os12g0616400;Os01g0213800;Os08g0544800;Os11g0175700
HORVU.MOREX.r3.5HG0424430.1032	HvPUT1	TF_motif_seq_0266	404	+	TGCCC	TCP	Os03g0785800;Os04g0194600;Os12g0616400;Os01g0213800;Os08g0544800;Os11g0175700
HORVU.MOREX.r3.5HG0424430.1033	HvPUT1	TF_motif_seq_0266	404	-	TGCCC	TCP	Os03g0785800;Os04g0194600;Os12g0616400;Os01g0213800;Os08g0544800;Os11g0175700
HORVU.MOREX.r3.5HG0424430.1034	HvPUT1	TF_motif_seq_0266	413	+	GGACA	TCP	Os03g0785800;Os04g0194600;Os12g0616400;Os01g0213800;Os08g0544800;Os11g0175700
HORVU.MOREX.r3.5HG0424430.1035	HvPUT1	TF_motif_seq_0266	413	-	GGACA	TCP	Os03g0785800;Os04g0194600;Os12g0616400;Os01g0213800;Os08g0544800;Os11g0175700
HORVU.MOREX.r3.5HG0424430.1036	HvPUT1	TF_motif_seq_0266	419	+	AGGCC	TCP	Os03g0785800;Os04g0194600;Os12g0616400;Os01g0213800;Os08g0544800;Os11g0175700
HORVU.MOREX.r3.5HG0424430.1037	HvPUT1	TF_motif_seq_0266	419	-	AGGCC	TCP	Os03g0785800;Os04g0194600;Os12g0616400;Os01g0213800;Os08g0544800;Os11g0175700
HORVU.MOREX.r3.5HG0424430.1038	HvPUT1	TF_motif_seq_0266	420	+	GGCCC	TCP	Os03g0785800;Os04g0194600;Os12g0616400;Os01g0213800;Os08g0544800;Os11g0175700
HORVU.MOREX.r3.5HG0424430.1039	HvPUT1	TF_motif_seq_0266	420	-	GGCCC	TCP	Os03g0785800;Os04g0194600;Os12g0616400;Os01g0213800;Os08g0544800;Os11g0175700
HORVU.MOREX.r3.5HG0424430.1040	HvPUT1	TF_motif_seq_0266	447	+	GGACG	TCP	Os03g0785800;Os04g0194600;Os12g0616400;Os01g0213800;Os08g0544800;Os11g0175700
HORVU.MOREX.r3.5HG0424430.1041	HvPUT1	TF_motif_seq_0266	447	-	GGACG	TCP	Os03g0785800;Os04g0194600;Os12g0616400;Os01g0213800;Os08g0544800;Os11g0175700
HORVU.MOREX.r3.5HG0424430.1042	HvPUT1	TF_motif_seq_0266	460	+	CGACC	TCP	Os03g0785800;Os04g0194600;Os12g0616400;Os01g0213800;Os08g0544800;Os11g0175700
HORVU.MOREX.r3.5HG0424430.1043	HvPUT1	TF_motif_seq_0266	460	-	CGACC	TCP	Os03g0785800;Os04g0194600;Os12g0616400;Os01g0213800;Os08g0544800;Os11g0175700
HORVU.MOREX.r3.5HG0424430.1044	HvPUT1	TF_motif_seq_0266	461	+	GACCC	TCP	Os03g0785800;Os04g0194600;Os12g0616400;Os01g0213800;Os08g0544800;Os11g0175700
HORVU.MOREX.r3.5HG0424430.1045	HvPUT1	TF_motif_seq_0266	461	-	GACCC	TCP	Os03g0785800;Os04g0194600;Os12g0616400;Os01g0213800;Os08g0544800;Os11g0175700
HORVU.MOREX.r3.5HG0424430.1046	HvPUT1	TF_motif_seq_0266	472	+	TGACC	TCP	Os03g0785800;Os04g0194600;Os12g0616400;Os01g0213800;Os08g0544800;Os11g0175700
HORVU.MOREX.r3.5HG0424430.1047	HvPUT1	TF_motif_seq_0266	472	-	TGACC	TCP	Os03g0785800;Os04g0194600;Os12g0616400;Os01g0213800;Os08g0544800;Os11g0175700
HORVU.MOREX.r3.5HG0424430.1048	HvPUT1	TF_motif_seq_0266	496	+	TGGCC	TCP	Os03g0785800;Os04g0194600;Os12g0616400;Os01g0213800;Os08g0544800;Os11g0175700
HORVU.MOREX.r3.5HG0424430.1049	HvPUT1	TF_motif_seq_0266	496	-	TGGCC	TCP	Os03g0785800;Os04g0194600;Os12g0616400;Os01g0213800;Os08g0544800;Os11g0175700
HORVU.MOREX.r3.5HG0424430.1050	HvPUT1	TF_motif_seq_0266	497	+	GGCCT	TCP	Os03g0785800;Os04g0194600;Os12g0616400;Os01g0213800;Os08g0544800;Os11g0175700
HORVU.MOREX.r3.5HG0424430.1051	HvPUT1	TF_motif_seq_0266	497	-	GGCCT	TCP	Os03g0785800;Os04g0194600;Os12g0616400;Os01g0213800;Os08g0544800;Os11g0175700
HORVU.MOREX.r3.5HG0424430.1052	HvPUT1	TF_motif_seq_0266	506	+	GGGCA	TCP	Os03g0785800;Os04g0194600;Os12g0616400;Os01g0213800;Os08g0544800;Os11g0175700
HORVU.MOREX.r3.5HG0424430.1053	HvPUT1	TF_motif_seq_0266	506	-	GGGCA	TCP	Os03g0785800;Os04g0194600;Os12g0616400;Os01g0213800;Os08g0544800;Os11g0175700
HORVU.MOREX.r3.5HG0424430.1054	HvPUT1	TF_motif_seq_0266	518	+	GGCTC	TCP	Os03g0785800;Os04g0194600;Os12g0616400;Os01g0213800;Os08g0544800;Os11g0175700
HORVU.MOREX.r3.5HG0424430.1055	HvPUT1	TF_motif_seq_0266	518	-	GGCTC	TCP	Os03g0785800;Os04g0194600;Os12g0616400;Os01g0213800;Os08g0544800;Os11g0175700
HORVU.MOREX.r3.5HG0424430.1056	HvPUT1	TF_motif_seq_0266	531	+	TGTCC	TCP	Os03g0785800;Os04g0194600;Os12g0616400;Os01g0213800;Os08g0544800;Os11g0175700
HORVU.MOREX.r3.5HG0424430.1057	HvPUT1	TF_motif_seq_0266	531	-	TGTCC	TCP	Os03g0785800;Os04g0194600;Os12g0616400;Os01g0213800;Os08g0544800;Os11g0175700
HORVU.MOREX.r3.5HG0424430.1058	HvPUT1	TF_motif_seq_0266	555	+	GGGCC	TCP	Os03g0785800;Os04g0194600;Os12g0616400;Os01g0213800;Os08g0544800;Os11g0175700
HORVU.MOREX.r3.5HG0424430.1059	HvPUT1	TF_motif_seq_0266	555	-	GGGCC	TCP	Os03g0785800;Os04g0194600;Os12g0616400;Os01g0213800;Os08g0544800;Os11g0175700
HORVU.MOREX.r3.5HG0424430.1060	HvPUT1	TF_motif_seq_0266	556	+	GGCCA	TCP	Os03g0785800;Os04g0194600;Os12g0616400;Os01g0213800;Os08g0544800;Os11g0175700
HORVU.MOREX.r3.5HG0424430.1061	HvPUT1	TF_motif_seq_0266	556	-	GGCCA	TCP	Os03g0785800;Os04g0194600;Os12g0616400;Os01g0213800;Os08g0544800;Os11g0175700
HORVU.MOREX.r3.5HG0424430.1062	HvPUT1	TF_motif_seq_0266	569	+	GTACC	TCP	Os03g0785800;Os04g0194600;Os12g0616400;Os01g0213800;Os08g0544800;Os11g0175700
HORVU.MOREX.r3.5HG0424430.1063	HvPUT1	TF_motif_seq_0266	569	-	GTACC	TCP	Os03g0785800;Os04g0194600;Os12g0616400;Os01g0213800;Os08g0544800;Os11g0175700
HORVU.MOREX.r3.5HG0424430.1064	HvPUT1	TF_motif_seq_0266	583	+	GGGCC	TCP	Os03g0785800;Os04g0194600;Os12g0616400;Os01g0213800;Os08g0544800;Os11g0175700
HORVU.MOREX.r3.5HG0424430.1065	HvPUT1	TF_motif_seq_0266	583	-	GGGCC	TCP	Os03g0785800;Os04g0194600;Os12g0616400;Os01g0213800;Os08g0544800;Os11g0175700
HORVU.MOREX.r3.5HG0424430.1066	HvPUT1	TF_motif_seq_0266	584	+	GGCCC	TCP	Os03g0785800;Os04g0194600;Os12g0616400;Os01g0213800;Os08g0544800;Os11g0175700
HORVU.MOREX.r3.5HG0424430.1067	HvPUT1	TF_motif_seq_0266	584	-	GGCCC	TCP	Os03g0785800;Os04g0194600;Os12g0616400;Os01g0213800;Os08g0544800;Os11g0175700
HORVU.MOREX.r3.5HG0424430.1068	HvPUT1	TF_motif_seq_0266	585	+	GCCCC	TCP	Os03g0785800;Os04g0194600;Os12g0616400;Os01g0213800;Os08g0544800;Os11g0175700
HORVU.MOREX.r3.5HG0424430.1069	HvPUT1	TF_motif_seq_0266	585	-	GCCCC	TCP	Os03g0785800;Os04g0194600;Os12g0616400;Os01g0213800;Os08g0544800;Os11g0175700
HORVU.MOREX.r3.5HG0424430.1070	HvPUT1	TF_motif_seq_0266	694	+	GTACC	TCP	Os03g0785800;Os04g0194600;Os12g0616400;Os01g0213800;Os08g0544800;Os11g0175700
HORVU.MOREX.r3.5HG0424430.1071	HvPUT1	TF_motif_seq_0266	694	-	GTACC	TCP	Os03g0785800;Os04g0194600;Os12g0616400;Os01g0213800;Os08g0544800;Os11g0175700
HORVU.MOREX.r3.5HG0424430.1072	HvPUT1	TF_motif_seq_0266	740	+	GGAAC	TCP	Os03g0785800;Os04g0194600;Os12g0616400;Os01g0213800;Os08g0544800;Os11g0175700
HORVU.MOREX.r3.5HG0424430.1073	HvPUT1	TF_motif_seq_0266	740	-	GGAAC	TCP	Os03g0785800;Os04g0194600;Os12g0616400;Os01g0213800;Os08g0544800;Os11g0175700
HORVU.MOREX.r3.5HG0424430.1074	HvPUT1	TF_motif_seq_0266	759	+	GGGCA	TCP	Os03g0785800;Os04g0194600;Os12g0616400;Os01g0213800;Os08g0544800;Os11g0175700
HORVU.MOREX.r3.5HG0424430.1075	HvPUT1	TF_motif_seq_0266	759	-	GGGCA	TCP	Os03g0785800;Os04g0194600;Os12g0616400;Os01g0213800;Os08g0544800;Os11g0175700
HORVU.MOREX.r3.5HG0424430.1076	HvPUT1	TF_motif_seq_0266	760	+	GGCAC	TCP	Os03g0785800;Os04g0194600;Os12g0616400;Os01g0213800;Os08g0544800;Os11g0175700
HORVU.MOREX.r3.5HG0424430.1077	HvPUT1	TF_motif_seq_0266	760	-	GGCAC	TCP	Os03g0785800;Os04g0194600;Os12g0616400;Os01g0213800;Os08g0544800;Os11g0175700
HORVU.MOREX.r3.5HG0424430.1078	HvPUT1	TF_motif_seq_0266	794	+	GAACC	TCP	Os03g0785800;Os04g0194600;Os12g0616400;Os01g0213800;Os08g0544800;Os11g0175700
HORVU.MOREX.r3.5HG0424430.1079	HvPUT1	TF_motif_seq_0266	794	-	GAACC	TCP	Os03g0785800;Os04g0194600;Os12g0616400;Os01g0213800;Os08g0544800;Os11g0175700
HORVU.MOREX.r3.5HG0424430.1080	HvPUT1	TF_motif_seq_0266	845	+	GGTCC	TCP	Os03g0785800;Os04g0194600;Os12g0616400;Os01g0213800;Os08g0544800;Os11g0175700
HORVU.MOREX.r3.5HG0424430.1081	HvPUT1	TF_motif_seq_0266	845	-	GGTCC	TCP	Os03g0785800;Os04g0194600;Os12g0616400;Os01g0213800;Os08g0544800;Os11g0175700
HORVU.MOREX.r3.5HG0424430.1082	HvPUT1	TF_motif_seq_0266	898	+	GGTGC	TCP	Os03g0785800;Os04g0194600;Os12g0616400;Os01g0213800;Os08g0544800;Os11g0175700
HORVU.MOREX.r3.5HG0424430.1083	HvPUT1	TF_motif_seq_0266	898	-	GGTGC	TCP	Os03g0785800;Os04g0194600;Os12g0616400;Os01g0213800;Os08g0544800;Os11g0175700
HORVU.MOREX.r3.5HG0424430.1084	HvPUT1	TF_motif_seq_0266	899	+	GTGCC	TCP	Os03g0785800;Os04g0194600;Os12g0616400;Os01g0213800;Os08g0544800;Os11g0175700
HORVU.MOREX.r3.5HG0424430.1085	HvPUT1	TF_motif_seq_0266	899	-	GTGCC	TCP	Os03g0785800;Os04g0194600;Os12g0616400;Os01g0213800;Os08g0544800;Os11g0175700
HORVU.MOREX.r3.5HG0424430.1086	HvPUT1	TF_motif_seq_0266	916	+	AGACC	TCP	Os03g0785800;Os04g0194600;Os12g0616400;Os01g0213800;Os08g0544800;Os11g0175700
HORVU.MOREX.r3.5HG0424430.1087	HvPUT1	TF_motif_seq_0266	916	-	AGACC	TCP	Os03g0785800;Os04g0194600;Os12g0616400;Os01g0213800;Os08g0544800;Os11g0175700
HORVU.MOREX.r3.5HG0424430.1088	HvPUT1	TF_motif_seq_0266	1063	+	TGACC	TCP	Os03g0785800;Os04g0194600;Os12g0616400;Os01g0213800;Os08g0544800;Os11g0175700
HORVU.MOREX.r3.5HG0424430.1089	HvPUT1	TF_motif_seq_0266	1063	-	TGACC	TCP	Os03g0785800;Os04g0194600;Os12g0616400;Os01g0213800;Os08g0544800;Os11g0175700
HORVU.MOREX.r3.5HG0424430.1090	HvPUT1	TF_motif_seq_0266	1236	+	GGTTC	TCP	Os03g0785800;Os04g0194600;Os12g0616400;Os01g0213800;Os08g0544800;Os11g0175700
HORVU.MOREX.r3.5HG0424430.1091	HvPUT1	TF_motif_seq_0266	1236	-	GGTTC	TCP	Os03g0785800;Os04g0194600;Os12g0616400;Os01g0213800;Os08g0544800;Os11g0175700
HORVU.MOREX.r3.5HG0424430.1092	HvPUT1	TF_motif_seq_0266	1314	+	GAACC	TCP	Os03g0785800;Os04g0194600;Os12g0616400;Os01g0213800;Os08g0544800;Os11g0175700
HORVU.MOREX.r3.5HG0424430.1093	HvPUT1	TF_motif_seq_0266	1314	-	GAACC	TCP	Os03g0785800;Os04g0194600;Os12g0616400;Os01g0213800;Os08g0544800;Os11g0175700
HORVU.MOREX.r3.5HG0424430.1094	HvPUT1	TF_motif_seq_0266	1340	+	CGCCC	TCP	Os03g0785800;Os04g0194600;Os12g0616400;Os01g0213800;Os08g0544800;Os11g0175700
HORVU.MOREX.r3.5HG0424430.1095	HvPUT1	TF_motif_seq_0266	1340	-	CGCCC	TCP	Os03g0785800;Os04g0194600;Os12g0616400;Os01g0213800;Os08g0544800;Os11g0175700
HORVU.MOREX.r3.5HG0424430.1096	HvPUT1	TF_motif_seq_0266	1345	+	AGCCC	TCP	Os03g0785800;Os04g0194600;Os12g0616400;Os01g0213800;Os08g0544800;Os11g0175700
HORVU.MOREX.r3.5HG0424430.1097	HvPUT1	TF_motif_seq_0266	1345	-	AGCCC	TCP	Os03g0785800;Os04g0194600;Os12g0616400;Os01g0213800;Os08g0544800;Os11g0175700
HORVU.MOREX.r3.5HG0424430.1098	HvPUT1	TF_motif_seq_0266	1365	+	AGTCC	TCP	Os03g0785800;Os04g0194600;Os12g0616400;Os01g0213800;Os08g0544800;Os11g0175700
HORVU.MOREX.r3.5HG0424430.1099	HvPUT1	TF_motif_seq_0266	1365	-	AGTCC	TCP	Os03g0785800;Os04g0194600;Os12g0616400;Os01g0213800;Os08g0544800;Os11g0175700
HORVU.MOREX.r3.5HG0424430.1100	HvPUT1	TF_motif_seq_0266	1380	+	GGTCC	TCP	Os03g0785800;Os04g0194600;Os12g0616400;Os01g0213800;Os08g0544800;Os11g0175700
HORVU.MOREX.r3.5HG0424430.1101	HvPUT1	TF_motif_seq_0266	1380	-	GGTCC	TCP	Os03g0785800;Os04g0194600;Os12g0616400;Os01g0213800;Os08g0544800;Os11g0175700
HORVU.MOREX.r3.5HG0424430.1102	HvPUT1	TF_motif_seq_0266	1419	+	TGTCC	TCP	Os03g0785800;Os04g0194600;Os12g0616400;Os01g0213800;Os08g0544800;Os11g0175700
HORVU.MOREX.r3.5HG0424430.1103	HvPUT1	TF_motif_seq_0266	1419	-	TGTCC	TCP	Os03g0785800;Os04g0194600;Os12g0616400;Os01g0213800;Os08g0544800;Os11g0175700
HORVU.MOREX.r3.5HG0424430.1104	HvPUT1	TF_motif_seq_0266	1420	+	GTCCC	TCP	Os03g0785800;Os04g0194600;Os12g0616400;Os01g0213800;Os08g0544800;Os11g0175700
HORVU.MOREX.r3.5HG0424430.1105	HvPUT1	TF_motif_seq_0266	1420	-	GTCCC	TCP	Os03g0785800;Os04g0194600;Os12g0616400;Os01g0213800;Os08g0544800;Os11g0175700
HORVU.MOREX.r3.5HG0424430.1106	HvPUT1	TF_motif_seq_0266	1434	+	GGGCT	TCP	Os03g0785800;Os04g0194600;Os12g0616400;Os01g0213800;Os08g0544800;Os11g0175700
HORVU.MOREX.r3.5HG0424430.1107	HvPUT1	TF_motif_seq_0266	1434	-	GGGCT	TCP	Os03g0785800;Os04g0194600;Os12g0616400;Os01g0213800;Os08g0544800;Os11g0175700
HORVU.MOREX.r3.5HG0424430.1108	HvPUT1	TF_motif_seq_0266	1478	+	GGGAC	TCP	Os03g0785800;Os04g0194600;Os12g0616400;Os01g0213800;Os08g0544800;Os11g0175700
HORVU.MOREX.r3.5HG0424430.1109	HvPUT1	TF_motif_seq_0266	1478	-	GGGAC	TCP	Os03g0785800;Os04g0194600;Os12g0616400;Os01g0213800;Os08g0544800;Os11g0175700
HORVU.MOREX.r3.5HG0424430.1110	HvPUT1	TF_motif_seq_0266	1479	+	GGACG	TCP	Os03g0785800;Os04g0194600;Os12g0616400;Os01g0213800;Os08g0544800;Os11g0175700
HORVU.MOREX.r3.5HG0424430.1111	HvPUT1	TF_motif_seq_0266	1479	-	GGACG	TCP	Os03g0785800;Os04g0194600;Os12g0616400;Os01g0213800;Os08g0544800;Os11g0175700
HORVU.MOREX.r3.5HG0424430.1112	HvPUT1	TF_motif_seq_0266	1483	+	GGACT	TCP	Os03g0785800;Os04g0194600;Os12g0616400;Os01g0213800;Os08g0544800;Os11g0175700
HORVU.MOREX.r3.5HG0424430.1113	HvPUT1	TF_motif_seq_0266	1483	-	GGACT	TCP	Os03g0785800;Os04g0194600;Os12g0616400;Os01g0213800;Os08g0544800;Os11g0175700
HORVU.MOREX.r3.5HG0424430.1114	HvPUT1	TF_motif_seq_0266	1492	+	GGATC	TCP	Os03g0785800;Os04g0194600;Os12g0616400;Os01g0213800;Os08g0544800;Os11g0175700
HORVU.MOREX.r3.5HG0424430.1115	HvPUT1	TF_motif_seq_0266	1492	-	GGATC	TCP	Os03g0785800;Os04g0194600;Os12g0616400;Os01g0213800;Os08g0544800;Os11g0175700
HORVU.MOREX.r3.5HG0424430.1116	HvPUT1	TF_motif_seq_0266	1493	+	GATCC	TCP	Os03g0785800;Os04g0194600;Os12g0616400;Os01g0213800;Os08g0544800;Os11g0175700
HORVU.MOREX.r3.5HG0424430.1117	HvPUT1	TF_motif_seq_0266	1493	-	GATCC	TCP	Os03g0785800;Os04g0194600;Os12g0616400;Os01g0213800;Os08g0544800;Os11g0175700
HORVU.MOREX.r3.5HG0424430.1118	HvPUT1	TF_motif_seq_0267	55	+	GATAC	Trihelix	AT5G01380
HORVU.MOREX.r3.5HG0424430.1119	HvPUT1	TF_motif_seq_0267	62	+	GTTAC	Trihelix	AT5G01380
HORVU.MOREX.r3.5HG0424430.1120	HvPUT1	TF_motif_seq_0267	62	-	GTTAC	Trihelix	AT5G01380
HORVU.MOREX.r3.5HG0424430.1121	HvPUT1	TF_motif_seq_0267	79	-	GCAAC	Trihelix	AT5G01380
HORVU.MOREX.r3.5HG0424430.1122	HvPUT1	TF_motif_seq_0267	142	-	CTAAC	Trihelix	AT5G01380
HORVU.MOREX.r3.5HG0424430.1123	HvPUT1	TF_motif_seq_0267	215	+	GCTAC	Trihelix	AT5G01380
HORVU.MOREX.r3.5HG0424430.1124	HvPUT1	TF_motif_seq_0267	399	-	GTAGC	Trihelix	AT5G01380
HORVU.MOREX.r3.5HG0424430.1125	HvPUT1	TF_motif_seq_0267	441	-	GTAAA	Trihelix	AT5G01380
HORVU.MOREX.r3.5HG0424430.1126	HvPUT1	TF_motif_seq_0267	479	-	ATAAC	Trihelix	AT5G01380
HORVU.MOREX.r3.5HG0424430.1127	HvPUT1	TF_motif_seq_0267	526	+	TTTAC	Trihelix	AT5G01380
HORVU.MOREX.r3.5HG0424430.1128	HvPUT1	TF_motif_seq_0267	569	-	GTACC	Trihelix	AT5G01380
HORVU.MOREX.r3.5HG0424430.1129	HvPUT1	TF_motif_seq_0267	594	+	GTCAC	Trihelix	AT5G01380
HORVU.MOREX.r3.5HG0424430.1130	HvPUT1	TF_motif_seq_0267	594	-	GTCAC	Trihelix	AT5G01380
HORVU.MOREX.r3.5HG0424430.1131	HvPUT1	TF_motif_seq_0267	599	+	GATAC	Trihelix	AT5G01380
HORVU.MOREX.r3.5HG0424430.1132	HvPUT1	TF_motif_seq_0267	626	-	GTAAA	Trihelix	AT5G01380
HORVU.MOREX.r3.5HG0424430.1133	HvPUT1	TF_motif_seq_0267	670	+	ATTAC	Trihelix	AT5G01380
HORVU.MOREX.r3.5HG0424430.1134	HvPUT1	TF_motif_seq_0267	694	-	GTACC	Trihelix	AT5G01380
HORVU.MOREX.r3.5HG0424430.1135	HvPUT1	TF_motif_seq_0267	708	+	TTTAC	Trihelix	AT5G01380
HORVU.MOREX.r3.5HG0424430.1136	HvPUT1	TF_motif_seq_0267	740	-	GGAAC	Trihelix	AT5G01380
HORVU.MOREX.r3.5HG0424430.1137	HvPUT1	TF_motif_seq_0267	807	-	TTAAC	Trihelix	AT5G01380
HORVU.MOREX.r3.5HG0424430.1138	HvPUT1	TF_motif_seq_0267	906	-	GAAAC	Trihelix	AT5G01380
HORVU.MOREX.r3.5HG0424430.1139	HvPUT1	TF_motif_seq_0267	939	+	GATAC	Trihelix	AT5G01380
HORVU.MOREX.r3.5HG0424430.1140	HvPUT1	TF_motif_seq_0267	949	-	GTAAT	Trihelix	AT5G01380
HORVU.MOREX.r3.5HG0424430.1141	HvPUT1	TF_motif_seq_0267	965	-	GTAAG	Trihelix	AT5G01380
HORVU.MOREX.r3.5HG0424430.1142	HvPUT1	TF_motif_seq_0267	971	-	GCAAC	Trihelix	AT5G01380
HORVU.MOREX.r3.5HG0424430.1143	HvPUT1	TF_motif_seq_0267	1049	+	GTTAC	Trihelix	AT5G01380
HORVU.MOREX.r3.5HG0424430.1144	HvPUT1	TF_motif_seq_0267	1049	-	GTTAC	Trihelix	AT5G01380
HORVU.MOREX.r3.5HG0424430.1145	HvPUT1	TF_motif_seq_0267	1093	+	GTTTC	Trihelix	AT5G01380
HORVU.MOREX.r3.5HG0424430.1146	HvPUT1	TF_motif_seq_0267	1155	+	ATTAC	Trihelix	AT5G01380
HORVU.MOREX.r3.5HG0424430.1147	HvPUT1	TF_motif_seq_0267	1196	+	GTTAA	Trihelix	AT5G01380
HORVU.MOREX.r3.5HG0424430.1148	HvPUT1	TF_motif_seq_0267	1197	-	TTAAC	Trihelix	AT5G01380
HORVU.MOREX.r3.5HG0424430.1149	HvPUT1	TF_motif_seq_0267	1283	-	GAAAC	Trihelix	AT5G01380
HORVU.MOREX.r3.5HG0424430.1150	HvPUT1	TF_motif_seq_0267	1292	+	ATTAC	Trihelix	AT5G01380
HORVU.MOREX.r3.5HG0424430.1151	HvPUT1	TF_motif_seq_0267	1447	+	ATTAC	Trihelix	AT5G01380
HORVU.MOREX.r3.5HG0424430.1152	HvPUT1	TF_motif_seq_0270	93	-	GGTCA	WRKY	AT1G13960;AT1G18860;AT1G29280;AT1G29860;AT1G30650;AT1G55600;AT1G62300;AT1G64000;AT1G66550;AT1G68150;AT1G69310;AT1G69810;AT1G80590;AT1G80840;AT2G03340;AT2G23320;AT2G24570;AT2G25000;AT2G30250;AT2G30590;AT2G34830;AT2G37260;AT2G38470;AT2G40740;AT2G40750;AT2G44745;AT2G46130;AT2G46400;AT2G47260;AT3G01080;AT3G01970;AT3G04670;AT3G56400;AT3G58710;AT4G01250;AT4G01720;AT4G04450;AT4G12020;AT4G18170;AT4G22070…
HORVU.MOREX.r3.5HG0424430.1153	HvPUT1	TF_motif_seq_0270	472	+	TGACC	WRKY	AT1G13960;AT1G18860;AT1G29280;AT1G29860;AT1G30650;AT1G55600;AT1G62300;AT1G64000;AT1G66550;AT1G68150;AT1G69310;AT1G69810;AT1G80590;AT1G80840;AT2G03340;AT2G23320;AT2G24570;AT2G25000;AT2G30250;AT2G30590;AT2G34830;AT2G37260;AT2G38470;AT2G40740;AT2G40750;AT2G44745;AT2G46130;AT2G46400;AT2G47260;AT3G01080;AT3G01970;AT3G04670;AT3G56400;AT3G58710;AT4G01250;AT4G01720;AT4G04450;AT4G12020;AT4G18170;AT4G22070…
HORVU.MOREX.r3.5HG0424430.1154	HvPUT1	TF_motif_seq_0270	593	-	AGTCA	WRKY	AT1G13960;AT1G18860;AT1G29280;AT1G29860;AT1G30650;AT1G55600;AT1G62300;AT1G64000;AT1G66550;AT1G68150;AT1G69310;AT1G69810;AT1G80590;AT1G80840;AT2G03340;AT2G23320;AT2G24570;AT2G25000;AT2G30250;AT2G30590;AT2G34830;AT2G37260;AT2G38470;AT2G40740;AT2G40750;AT2G44745;AT2G46130;AT2G46400;AT2G47260;AT3G01080;AT3G01970;AT3G04670;AT3G56400;AT3G58710;AT4G01250;AT4G01720;AT4G04450;AT4G12020;AT4G18170;AT4G22070…
HORVU.MOREX.r3.5HG0424430.1155	HvPUT1	TF_motif_seq_0270	1063	+	TGACC	WRKY	AT1G13960;AT1G18860;AT1G29280;AT1G29860;AT1G30650;AT1G55600;AT1G62300;AT1G64000;AT1G66550;AT1G68150;AT1G69310;AT1G69810;AT1G80590;AT1G80840;AT2G03340;AT2G23320;AT2G24570;AT2G25000;AT2G30250;AT2G30590;AT2G34830;AT2G37260;AT2G38470;AT2G40740;AT2G40750;AT2G44745;AT2G46130;AT2G46400;AT2G47260;AT3G01080;AT3G01970;AT3G04670;AT3G56400;AT3G58710;AT4G01250;AT4G01720;AT4G04450;AT4G12020;AT4G18170;AT4G22070…
HORVU.MOREX.r3.5HG0424430.1156	HvPUT1	TF_motif_seq_0270	1151	-	AGTCA	WRKY	AT1G13960;AT1G18860;AT1G29280;AT1G29860;AT1G30650;AT1G55600;AT1G62300;AT1G64000;AT1G66550;AT1G68150;AT1G69310;AT1G69810;AT1G80590;AT1G80840;AT2G03340;AT2G23320;AT2G24570;AT2G25000;AT2G30250;AT2G30590;AT2G34830;AT2G37260;AT2G38470;AT2G40740;AT2G40750;AT2G44745;AT2G46130;AT2G46400;AT2G47260;AT3G01080;AT3G01970;AT3G04670;AT3G56400;AT3G58710;AT4G01250;AT4G01720;AT4G04450;AT4G12020;AT4G18170;AT4G22070…
HORVU.MOREX.r3.5HG0424430.1157	HvPUT1	TF_motif_seq_0271	23	+	TGGCG	bZIP	AT1G77920;AT3G12250;AT5G06950;AT5G06960;AT5G10030;AT5G65210;AT1G22070
HORVU.MOREX.r3.5HG0424430.1158	HvPUT1	TF_motif_seq_0271	61	-	CGTTA	bZIP	AT1G77920;AT3G12250;AT5G06950;AT5G06960;AT5G10030;AT5G65210;AT1G22070
HORVU.MOREX.r3.5HG0424430.1159	HvPUT1	TF_motif_seq_0271	73	-	CGTCT	bZIP	AT1G77920;AT3G12250;AT5G06950;AT5G06960;AT5G10030;AT5G65210;AT1G22070
HORVU.MOREX.r3.5HG0424430.1160	HvPUT1	TF_motif_seq_0271	93	-	GGTCA	bZIP	AT1G77920;AT3G12250;AT5G06950;AT5G06960;AT5G10030;AT5G65210;AT1G22070
HORVU.MOREX.r3.5HG0424430.1161	HvPUT1	TF_motif_seq_0271	112	-	CGCCA	bZIP	AT1G77920;AT3G12250;AT5G06950;AT5G06960;AT5G10030;AT5G65210;AT1G22070
HORVU.MOREX.r3.5HG0424430.1162	HvPUT1	TF_motif_seq_0271	128	-	CTTCA	bZIP	AT1G77920;AT3G12250;AT5G06950;AT5G06960;AT5G10030;AT5G65210;AT1G22070
HORVU.MOREX.r3.5HG0424430.1163	HvPUT1	TF_motif_seq_0271	130	+	TCACG	bZIP	AT1G77920;AT3G12250;AT5G06950;AT5G06960;AT5G10030;AT5G65210;AT1G22070
HORVU.MOREX.r3.5HG0424430.1164	HvPUT1	TF_motif_seq_0271	137	-	CGTCC	bZIP	AT1G77920;AT3G12250;AT5G06950;AT5G06960;AT5G10030;AT5G65210;AT1G22070
HORVU.MOREX.r3.5HG0424430.1165	HvPUT1	TF_motif_seq_0271	143	+	TAACG	bZIP	AT1G77920;AT3G12250;AT5G06950;AT5G06960;AT5G10030;AT5G65210;AT1G22070
HORVU.MOREX.r3.5HG0424430.1166	HvPUT1	TF_motif_seq_0271	246	+	CGACG	bZIP	AT1G77920;AT3G12250;AT5G06950;AT5G06960;AT5G10030;AT5G65210;AT1G22070
HORVU.MOREX.r3.5HG0424430.1167	HvPUT1	TF_motif_seq_0271	253	-	CGGCA	bZIP	AT1G77920;AT3G12250;AT5G06950;AT5G06960;AT5G10030;AT5G65210;AT1G22070
HORVU.MOREX.r3.5HG0424430.1168	HvPUT1	TF_motif_seq_0271	279	-	CGTGA	bZIP	AT1G77920;AT3G12250;AT5G06950;AT5G06960;AT5G10030;AT5G65210;AT1G22070
HORVU.MOREX.r3.5HG0424430.1169	HvPUT1	TF_motif_seq_0271	281	+	TGAGG	bZIP	AT1G77920;AT3G12250;AT5G06950;AT5G06960;AT5G10030;AT5G65210;AT1G22070
HORVU.MOREX.r3.5HG0424430.1170	HvPUT1	TF_motif_seq_0271	428	+	TCACG	bZIP	AT1G77920;AT3G12250;AT5G06950;AT5G06960;AT5G10030;AT5G65210;AT1G22070
HORVU.MOREX.r3.5HG0424430.1171	HvPUT1	TF_motif_seq_0271	447	+	GGACG	bZIP	AT1G77920;AT3G12250;AT5G06950;AT5G06960;AT5G10030;AT5G65210;AT1G22070
HORVU.MOREX.r3.5HG0424430.1172	HvPUT1	TF_motif_seq_0271	472	+	TGACC	bZIP	AT1G77920;AT3G12250;AT5G06950;AT5G06960;AT5G10030;AT5G65210;AT1G22070
HORVU.MOREX.r3.5HG0424430.1173	HvPUT1	TF_motif_seq_0271	576	+	TGACA	bZIP	AT1G77920;AT3G12250;AT5G06950;AT5G06960;AT5G10030;AT5G65210;AT1G22070
HORVU.MOREX.r3.5HG0424430.1174	HvPUT1	TF_motif_seq_0271	593	-	AGTCA	bZIP	AT1G77920;AT3G12250;AT5G06950;AT5G06960;AT5G10030;AT5G65210;AT1G22070
HORVU.MOREX.r3.5HG0424430.1175	HvPUT1	TF_motif_seq_0271	595	+	TCACG	bZIP	AT1G77920;AT3G12250;AT5G06950;AT5G06960;AT5G10030;AT5G65210;AT1G22070
HORVU.MOREX.r3.5HG0424430.1176	HvPUT1	TF_motif_seq_0271	606	-	CGACA	bZIP	AT1G77920;AT3G12250;AT5G06950;AT5G06960;AT5G10030;AT5G65210;AT1G22070
HORVU.MOREX.r3.5HG0424430.1177	HvPUT1	TF_motif_seq_0271	664	-	CATCA	bZIP	AT1G77920;AT3G12250;AT5G06950;AT5G06960;AT5G10030;AT5G65210;AT1G22070
HORVU.MOREX.r3.5HG0424430.1178	HvPUT1	TF_motif_seq_0271	688	-	CTTCA	bZIP	AT1G77920;AT3G12250;AT5G06950;AT5G06960;AT5G10030;AT5G65210;AT1G22070
HORVU.MOREX.r3.5HG0424430.1179	HvPUT1	TF_motif_seq_0271	698	-	CATCA	bZIP	AT1G77920;AT3G12250;AT5G06950;AT5G06960;AT5G10030;AT5G65210;AT1G22070
HORVU.MOREX.r3.5HG0424430.1180	HvPUT1	TF_motif_seq_0271	964	-	CGTAA	bZIP	AT1G77920;AT3G12250;AT5G06950;AT5G06960;AT5G10030;AT5G65210;AT1G22070
HORVU.MOREX.r3.5HG0424430.1181	HvPUT1	TF_motif_seq_0271	980	+	TGAAG	bZIP	AT1G77920;AT3G12250;AT5G06950;AT5G06960;AT5G10030;AT5G65210;AT1G22070
HORVU.MOREX.r3.5HG0424430.1182	HvPUT1	TF_motif_seq_0271	986	-	CATCA	bZIP	AT1G77920;AT3G12250;AT5G06950;AT5G06960;AT5G10030;AT5G65210;AT1G22070
HORVU.MOREX.r3.5HG0424430.1183	HvPUT1	TF_motif_seq_0271	1063	+	TGACC	bZIP	AT1G77920;AT3G12250;AT5G06950;AT5G06960;AT5G10030;AT5G65210;AT1G22070
HORVU.MOREX.r3.5HG0424430.1184	HvPUT1	TF_motif_seq_0271	1151	-	AGTCA	bZIP	AT1G77920;AT3G12250;AT5G06950;AT5G06960;AT5G10030;AT5G65210;AT1G22070
HORVU.MOREX.r3.5HG0424430.1185	HvPUT1	TF_motif_seq_0271	1168	+	TGACA	bZIP	AT1G77920;AT3G12250;AT5G06950;AT5G06960;AT5G10030;AT5G65210;AT1G22070
HORVU.MOREX.r3.5HG0424430.1186	HvPUT1	TF_motif_seq_0271	1479	+	GGACG	bZIP	AT1G77920;AT3G12250;AT5G06950;AT5G06960;AT5G10030;AT5G65210;AT1G22070
HORVU.MOREX.r3.5HG0424430.1187	HvPUT1	TF_motif_seq_0282	715	-	tTTATT	Alpha-amylase	M24286;M24287
HORVU.MOREX.r3.5HG0424430.1188	HvPUT1	TF_motif_seq_0282	719	-	tTTATT	Alpha-amylase	M24286;M24287
HORVU.MOREX.r3.5HG0424430.1189	HvPUT1	TF_motif_seq_0282	823	-	tTTATT	Alpha-amylase	M24286;M24287
HORVU.MOREX.r3.5HG0424430.1190	HvPUT1	TF_motif_seq_0282	1306	+	AATAAa	Alpha-amylase	M24286;M24287
HORVU.MOREX.r3.5HG0424430.1191	HvPUT1	TF_motif_seq_0282	1401	+	AATAAa	Alpha-amylase	M24286;M24287
HORVU.MOREX.r3.5HG0424430.1192	HvPUT1	TF_motif_seq_0287	212	+	ACTGCt	bZIP	AT1G43700
HORVU.MOREX.r3.5HG0424430.1193	HvPUT1	TF_motif_seq_0287	376	+	ACGGCt	bZIP	AT1G43700
HORVU.MOREX.r3.5HG0424430.1194	HvPUT1	TF_motif_seq_0287	449	+	ACGGCt	bZIP	AT1G43700
HORVU.MOREX.r3.5HG0424430.1195	HvPUT1	TF_motif_seq_0287	571	+	ACCGCt	bZIP	AT1G43700
HORVU.MOREX.r3.5HG0424430.1196	HvPUT1	TF_motif_seq_0287	622	-	aGCTGT	bZIP	AT1G43700
HORVU.MOREX.r3.5HG0424430.1197	HvPUT1	TF_motif_seq_0298	1024	-	cATGTG	bHLH	AT1G32640
HORVU.MOREX.r3.5HG0424430.1198	HvPUT1	TF_motif_seq_0300	59	+	CACGTt	bHLH	AT1G09530;AT2G20180;AT4G17880;AT5G46760
HORVU.MOREX.r3.5HG0424430.1199	HvPUT1	TF_motif_seq_0300	59	-	cACGTT	bHLH	AT1G09530;AT2G20180;AT4G17880;AT5G46760
HORVU.MOREX.r3.5HG0424430.1200	HvPUT1	TF_motif_seq_0300	589	+	CACGAg	bHLH	AT1G09530;AT2G20180;AT4G17880;AT5G46760
HORVU.MOREX.r3.5HG0424430.1201	HvPUT1	TF_motif_seq_0300	589	-	cACGAG	bHLH	AT1G09530;AT2G20180;AT4G17880;AT5G46760
HORVU.MOREX.r3.5HG0424430.1202	HvPUT1	TF_motif_seq_0300	1024	+	CATGTg	bHLH	AT1G09530;AT2G20180;AT4G17880;AT5G46760
HORVU.MOREX.r3.5HG0424430.1203	HvPUT1	TF_motif_seq_0300	1024	-	cATGTG	bHLH	AT1G09530;AT2G20180;AT4G17880;AT5G46760
HORVU.MOREX.r3.5HG0424430.1204	HvPUT1	TF_motif_seq_0300	1171	+	CAAGTg	bHLH	AT1G09530;AT2G20180;AT4G17880;AT5G46760
HORVU.MOREX.r3.5HG0424430.1205	HvPUT1	TF_motif_seq_0300	1171	-	cAAGTG	bHLH	AT1G09530;AT2G20180;AT4G17880;AT5G46760
HORVU.MOREX.r3.5HG0424430.1206	HvPUT1	TF_motif_seq_0301	1024	-	cATGTG	bHLH	AT1G32640
HORVU.MOREX.r3.5HG0424430.1207	HvPUT1	TF_motif_seq_0301	1171	-	cAAGTG	bHLH	AT1G32640
HORVU.MOREX.r3.5HG0424430.1208	HvPUT1	TF_motif_seq_0302	1024	+	CATGTg	bHLH	AT5G08130;AT3G26744
HORVU.MOREX.r3.5HG0424430.1209	HvPUT1	TF_motif_seq_0302	1024	-	cATGTG	bHLH	AT5G08130;AT3G26744
HORVU.MOREX.r3.5HG0424430.1210	HvPUT1	TF_motif_seq_0302	1135	+	CAAATg	bHLH	AT5G08130;AT3G26744
HORVU.MOREX.r3.5HG0424430.1211	HvPUT1	TF_motif_seq_0302	1135	-	cAAATG	bHLH	AT5G08130;AT3G26744
HORVU.MOREX.r3.5HG0424430.1212	HvPUT1	TF_motif_seq_0302	1171	+	CAAGTg	bHLH	AT5G08130;AT3G26744
HORVU.MOREX.r3.5HG0424430.1213	HvPUT1	TF_motif_seq_0302	1171	-	cAAGTG	bHLH	AT5G08130;AT3G26744
HORVU.MOREX.r3.5HG0424430.1214	HvPUT1	TF_motif_seq_0302	1415	+	CAGTTg	bHLH	AT5G08130;AT3G26744
HORVU.MOREX.r3.5HG0424430.1215	HvPUT1	TF_motif_seq_0302	1415	-	cAGTTG	bHLH	AT5G08130;AT3G26744
HORVU.MOREX.r3.5HG0424430.1216	HvPUT1	TF_motif_seq_0305	1024	+	CATGTg	NAC; NAM	AT1G52890;AT3G15500;AT4G27410
HORVU.MOREX.r3.5HG0424430.1217	HvPUT1	TF_motif_seq_0313	480	-	tAACTG	(Others)	D14712
HORVU.MOREX.r3.5HG0424430.1218	HvPUT1	TF_motif_seq_0313	808	-	tAACCG	(Others)	D14712
HORVU.MOREX.r3.5HG0424430.1219	HvPUT1	TF_motif_seq_0313	972	-	cAACAG	(Others)	D14712
HORVU.MOREX.r3.5HG0424430.1220	HvPUT1	TF_motif_seq_0313	1194	+	CGGTTa	(Others)	D14712
HORVU.MOREX.r3.5HG0424430.1221	HvPUT1	TF_motif_seq_0313	1198	-	tAACCG	(Others)	D14712
HORVU.MOREX.r3.5HG0424430.1222	HvPUT1	TF_motif_seq_0313	1415	+	CAGTTg	(Others)	D14712
HORVU.MOREX.r3.5HG0424430.1223	HvPUT1	TF_motif_seq_0316	71	+	GCCGTc	(Others)	L345501
HORVU.MOREX.r3.5HG0424430.1224	HvPUT1	TF_motif_seq_0316	71	-	gCCGTC	(Others)	L345501
HORVU.MOREX.r3.5HG0424430.1225	HvPUT1	TF_motif_seq_0316	448	+	GACGGc	(Others)	L345501
HORVU.MOREX.r3.5HG0424430.1226	HvPUT1	TF_motif_seq_0316	448	-	gACGGC	(Others)	L345501
HORVU.MOREX.r3.5HG0424430.1227	HvPUT1	TF_motif_seq_0316	984	+	GACATc	(Others)	L345501
HORVU.MOREX.r3.5HG0424430.1228	HvPUT1	TF_motif_seq_0316	984	-	gACATC	(Others)	L345501
HORVU.MOREX.r3.5HG0424430.1229	HvPUT1	TF_motif_seq_0319	708	-	tTTACC	Trihelix	AT1G33240
HORVU.MOREX.r3.5HG0424430.1230	HvPUT1	TF_motif_seq_0320	807	-	tTAACC	MADF; Trihelix	AT1G13450
HORVU.MOREX.r3.5HG0424430.1231	HvPUT1	TF_motif_seq_0320	1195	+	GGTTAa	MADF; Trihelix	AT1G13450
HORVU.MOREX.r3.5HG0424430.1232	HvPUT1	TF_motif_seq_0320	1197	-	tTAACC	MADF; Trihelix	AT1G13450
HORVU.MOREX.r3.5HG0424430.1233	HvPUT1	TF_motif_seq_0326	480	+	TAACTg	(Others)	D14712
HORVU.MOREX.r3.5HG0424430.1234	HvPUT1	TF_motif_seq_0327	566	+	TTCGTa	(Others)	L34551
HORVU.MOREX.r3.5HG0424430.1235	HvPUT1	TF_motif_seq_0327	566	-	tTCGTA	(Others)	L34551
HORVU.MOREX.r3.5HG0424430.1236	HvPUT1	TF_motif_seq_0327	643	+	TCCGTa	(Others)	L34551
HORVU.MOREX.r3.5HG0424430.1237	HvPUT1	TF_motif_seq_0327	643	-	tCCGTA	(Others)	L34551
HORVU.MOREX.r3.5HG0424430.1238	HvPUT1	TF_motif_seq_0327	962	+	TTCGTa	(Others)	L34551
HORVU.MOREX.r3.5HG0424430.1239	HvPUT1	TF_motif_seq_0327	962	-	tTCGTA	(Others)	L34551
HORVU.MOREX.r3.5HG0424430.1240	HvPUT1	TF_motif_seq_0327	1037	+	TACTTa	(Others)	L34551
HORVU.MOREX.r3.5HG0424430.1241	HvPUT1	TF_motif_seq_0327	1037	-	tACTTA	(Others)	L34551
HORVU.MOREX.r3.5HG0424430.1242	HvPUT1	TF_motif_seq_0327	1294	+	TACATa	(Others)	L34551
HORVU.MOREX.r3.5HG0424430.1243	HvPUT1	TF_motif_seq_0327	1294	-	tACATA	(Others)	L34551
HORVU.MOREX.r3.5HG0424430.1244	HvPUT1	TF_motif_seq_0327	1350	+	TACTTa	(Others)	L34551
HORVU.MOREX.r3.5HG0424430.1245	HvPUT1	TF_motif_seq_0327	1350	-	tACTTA	(Others)	L34551
HORVU.MOREX.r3.5HG0424430.1246	HvPUT1	TF_motif_seq_0339	1062	+	TTGACc	WRKY	AT1G13960;AT1G18860;AT1G29280;AT1G29860;AT1G30650;AT1G55600;AT1G62300;AT1G64000;AT1G66550;AT1G68150;AT1G69310;AT1G69810;AT1G80590;AT1G80840;AT2G03340;AT2G23320;AT2G24570;AT2G25000;AT2G30250;AT2G30590;AT2G34830;AT2G37260;AT2G38470;AT2G40740;AT2G40750;AT2G44745;AT2G46130;AT2G46400;AT2G47260;AT3G01080;AT3G01970;AT3G04670;AT3G56400;AT3G58710;AT4G01250;AT4G01720;AT4G04450;AT4G12020;AT4G18170;AT4G22070…
HORVU.MOREX.r3.5HG0424430.1247	HvPUT1	TF_motif_seq_0339	1167	+	TTGACa	WRKY	AT1G13960;AT1G18860;AT1G29280;AT1G29860;AT1G30650;AT1G55600;AT1G62300;AT1G64000;AT1G66550;AT1G68150;AT1G69310;AT1G69810;AT1G80590;AT1G80840;AT2G03340;AT2G23320;AT2G24570;AT2G25000;AT2G30250;AT2G30590;AT2G34830;AT2G37260;AT2G38470;AT2G40740;AT2G40750;AT2G44745;AT2G46130;AT2G46400;AT2G47260;AT3G01080;AT3G01970;AT3G04670;AT3G56400;AT3G58710;AT4G01250;AT4G01720;AT4G04450;AT4G12020;AT4G18170;AT4G22070…
HORVU.MOREX.r3.5HG0424430.1248	HvPUT1	TF_motif_seq_0347	669	+	AATTAca	Alpha-amylase	M24286;M24287
HORVU.MOREX.r3.5HG0424430.1249	HvPUT1	TF_motif_seq_0347	1039	-	ctTAATT	Alpha-amylase	M24286;M24287
HORVU.MOREX.r3.5HG0424430.1250	HvPUT1	TF_motif_seq_0347	1073	+	AATTAta	Alpha-amylase	M24286;M24287
HORVU.MOREX.r3.5HG0424430.1251	HvPUT1	TF_motif_seq_0347	1291	+	AATTAca	Alpha-amylase	M24286;M24287
HORVU.MOREX.r3.5HG0424430.1252	HvPUT1	TF_motif_seq_0349	604	+	AACGAca	(Others)	X67670;X67671
HORVU.MOREX.r3.5HG0424430.1253	HvPUT1	TF_motif_seq_0349	771	+	ACCGAaa	(Others)	X67670;X67671
HORVU.MOREX.r3.5HG0424430.1254	HvPUT1	TF_motif_seq_0349	778	+	ACCGAaa	(Others)	X67670;X67671
HORVU.MOREX.r3.5HG0424430.1255	HvPUT1	TF_motif_seq_0349	817	-	tgTTGGT	(Others)	X67670;X67671
HORVU.MOREX.r3.5HG0424430.1256	HvPUT1	TF_motif_seq_0349	1191	-	ttTCGGT	(Others)	X67670;X67671
HORVU.MOREX.r3.5HG0424430.1257	HvPUT1	TF_motif_seq_0356	448	-	gaCGGCT	ERF	Os02g0782700
HORVU.MOREX.r3.5HG0424430.1258	HvPUT1	TF_motif_seq_0356	560	+	AGCCGct	ERF	Os02g0782700
HORVU.MOREX.r3.5HG0424430.1259	HvPUT1	TF_motif_seq_0359	131	+	CACGCcc	FAR1	AT3G22170;AT4G15090
HORVU.MOREX.r3.5HG0424430.1260	HvPUT1	TF_motif_seq_0386	190	-	ctGGATA	Alpha-amylase	X16509
HORVU.MOREX.r3.5HG0424430.1261	HvPUT1	TF_motif_seq_0394	440	+	TGTAAat	(Others)	U82230
HORVU.MOREX.r3.5HG0424430.1262	HvPUT1	TF_motif_seq_0394	625	+	TGTAAag	(Others)	U82230
HORVU.MOREX.r3.5HG0424430.1263	HvPUT1	TF_motif_seq_0394	1154	-	caTTACA	(Others)	U82230
HORVU.MOREX.r3.5HG0424430.1264	HvPUT1	TF_motif_seq_0398	1	+	TTTAGgg	MYB-related	GRMZM2G136887
HORVU.MOREX.r3.5HG0424430.1265	HvPUT1	TF_motif_seq_0398	361	-	gcCTAAA	MYB-related	GRMZM2G136887
HORVU.MOREX.r3.5HG0424430.1266	HvPUT1	TF_motif_seq_0398	409	+	TTTAGga	MYB-related	GRMZM2G136887
HORVU.MOREX.r3.5HG0424430.1267	HvPUT1	TF_motif_seq_0398	533	-	tcCTAAA	MYB-related	GRMZM2G136887
HORVU.MOREX.r3.5HG0424430.1268	HvPUT1	TF_motif_seq_0398	678	-	tcCTAAA	MYB-related	GRMZM2G136887
HORVU.MOREX.r3.5HG0424430.1269	HvPUT1	TF_motif_seq_0410	56	+	ATACAcgt	bHLH	AT1G32640
HORVU.MOREX.r3.5HG0424430.1270	HvPUT1	TF_motif_seq_0410	931	+	ATATGtgg	bHLH	AT1G32640
HORVU.MOREX.r3.5HG0424430.1271	HvPUT1	TF_motif_seq_0410	1158	-	acaCTTAT	bHLH	AT1G32640
HORVU.MOREX.r3.5HG0424430.1272	HvPUT1	TF_motif_seq_0410	1315	-	aacCGTAT	bHLH	AT1G32640
HORVU.MOREX.r3.5HG0424430.1273	HvPUT1	TF_motif_seq_0422	1173	-	agtGCATG	LEA_5	U22102
HORVU.MOREX.r3.5HG0424430.1274	HvPUT1	TF_motif_seq_0424	588	+	CCACGagt	bZIP	AT1G03970;AT2G46270;AT4G01120;AT4G36730
HORVU.MOREX.r3.5HG0424430.1275	HvPUT1	TF_motif_seq_0430	359	+	GGGCCtaa	TCP	Os04g0194600;Os08g0544800
HORVU.MOREX.r3.5HG0424430.1276	HvPUT1	TF_motif_seq_0430	555	+	GGGCCagc	TCP	Os04g0194600;Os08g0544800
HORVU.MOREX.r3.5HG0424430.1277	HvPUT1	TF_motif_seq_0430	581	-	ctgGGCCC	TCP	Os04g0194600;Os08g0544800
HORVU.MOREX.r3.5HG0424430.1278	HvPUT1	TF_motif_seq_0430	583	+	GGGCCcca	TCP	Os04g0194600;Os08g0544800
HORVU.MOREX.r3.5HG0424430.1279	HvPUT1	TF_motif_seq_0431	29	+	GGTCCgat	TCP	Os04g0194600;Os08g0544800
HORVU.MOREX.r3.5HG0424430.1280	HvPUT1	TF_motif_seq_0431	206	+	GGTGCcac	TCP	Os04g0194600;Os08g0544800
HORVU.MOREX.r3.5HG0424430.1281	HvPUT1	TF_motif_seq_0431	356	-	atgGGGCC	TCP	Os04g0194600;Os08g0544800
HORVU.MOREX.r3.5HG0424430.1282	HvPUT1	TF_motif_seq_0431	581	-	ctgGGCCC	TCP	Os04g0194600;Os08g0544800
HORVU.MOREX.r3.5HG0424430.1283	HvPUT1	TF_motif_seq_0431	584	+	GGCCCcac	TCP	Os04g0194600;Os08g0544800
HORVU.MOREX.r3.5HG0424430.1284	HvPUT1	TF_motif_seq_0444	364	+	TAAATgca	Homeodomain; HD-ZIP;HD-ZIP	AT4G21750;AT4G04890
HORVU.MOREX.r3.5HG0424430.1285	HvPUT1	TF_motif_seq_0444	442	+	TAAATgga	Homeodomain; HD-ZIP;HD-ZIP	AT4G21750;AT4G04890
HORVU.MOREX.r3.5HG0424430.1286	HvPUT1	TF_motif_seq_0444	536	+	TAAATgct	Homeodomain; HD-ZIP;HD-ZIP	AT4G21750;AT4G04890
HORVU.MOREX.r3.5HG0424430.1287	HvPUT1	TF_motif_seq_0444	704	-	tgcATTTA	Homeodomain; HD-ZIP;HD-ZIP	AT4G21750;AT4G04890
HORVU.MOREX.r3.5HG0424430.1288	HvPUT1	TF_motif_seq_0456	851	-	gtgGGAAA	E2F/DP	AT5G22220;AT2G36010
HORVU.MOREX.r3.5HG0424430.1289	HvPUT1	TF_motif_seq_0508	566	+	ttCGTACcg	SBP	AT1G20980;AT1G27360;AT1G27370;AT1G53160;AT1G69170;AT1G76580;AT2G33810;AT2G42200;AT2G47070;AT3G15270;AT3G57920;AT3G60030;AT5G18830;AT5G43270;Os01g0292900;Os01g0922600;Os02g0139400;Os02g0174100;Os02g0177300;Os03g0833300;Os04g0551500;Os05g0408200;Os06g0659100;Os06g0663500;Os06g0703500;Os08g0509600;Os08g0513700;Os08g0531600;Os09g0491532;Os09g0507100;Os11g0496600
HORVU.MOREX.r3.5HG0424430.1290	HvPUT1	TF_motif_seq_0508	867	-	ttGTTCGat	SBP	AT1G20980;AT1G27360;AT1G27370;AT1G53160;AT1G69170;AT1G76580;AT2G33810;AT2G42200;AT2G47070;AT3G15270;AT3G57920;AT3G60030;AT5G18830;AT5G43270;Os01g0292900;Os01g0922600;Os02g0139400;Os02g0174100;Os02g0177300;Os03g0833300;Os04g0551500;Os05g0408200;Os06g0659100;Os06g0663500;Os06g0703500;Os08g0509600;Os08g0513700;Os08g0531600;Os09g0491532;Os09g0507100;Os11g0496600
HORVU.MOREX.r3.5HG0424430.1291	HvPUT1	TF_motif_seq_0508	885	-	ttGTTCGgt	SBP	AT1G20980;AT1G27360;AT1G27370;AT1G53160;AT1G69170;AT1G76580;AT2G33810;AT2G42200;AT2G47070;AT3G15270;AT3G57920;AT3G60030;AT5G18830;AT5G43270;Os01g0292900;Os01g0922600;Os02g0139400;Os02g0174100;Os02g0177300;Os03g0833300;Os04g0551500;Os05g0408200;Os06g0659100;Os06g0663500;Os06g0703500;Os08g0509600;Os08g0513700;Os08g0531600;Os09g0491532;Os09g0507100;Os11g0496600
HORVU.MOREX.r3.5HG0424430.1292	HvPUT1	TF_motif_seq_0508	918	+	acCGAACaa	SBP	AT1G20980;AT1G27360;AT1G27370;AT1G53160;AT1G69170;AT1G76580;AT2G33810;AT2G42200;AT2G47070;AT3G15270;AT3G57920;AT3G60030;AT5G18830;AT5G43270;Os01g0292900;Os01g0922600;Os02g0139400;Os02g0174100;Os02g0177300;Os03g0833300;Os04g0551500;Os05g0408200;Os06g0659100;Os06g0663500;Os06g0703500;Os08g0509600;Os08g0513700;Os08g0531600;Os09g0491532;Os09g0507100;Os11g0496600
HORVU.MOREX.r3.5HG0424430.1293	HvPUT1	TF_motif_seq_0508	999	+	ttCGCACat	SBP	AT1G20980;AT1G27360;AT1G27370;AT1G53160;AT1G69170;AT1G76580;AT2G33810;AT2G42200;AT2G47070;AT3G15270;AT3G57920;AT3G60030;AT5G18830;AT5G43270;Os01g0292900;Os01g0922600;Os02g0139400;Os02g0174100;Os02g0177300;Os03g0833300;Os04g0551500;Os05g0408200;Os06g0659100;Os06g0663500;Os06g0703500;Os08g0509600;Os08g0513700;Os08g0531600;Os09g0491532;Os09g0507100;Os11g0496600
HORVU.MOREX.r3.5HG0424430.1294	HvPUT1	TF_motif_seq_0508	1200	+	acCGAACaa	SBP	AT1G20980;AT1G27360;AT1G27370;AT1G53160;AT1G69170;AT1G76580;AT2G33810;AT2G42200;AT2G47070;AT3G15270;AT3G57920;AT3G60030;AT5G18830;AT5G43270;Os01g0292900;Os01g0922600;Os02g0139400;Os02g0174100;Os02g0177300;Os03g0833300;Os04g0551500;Os05g0408200;Os06g0659100;Os06g0663500;Os06g0703500;Os08g0509600;Os08g0513700;Os08g0531600;Os09g0491532;Os09g0507100;Os11g0496600
HORVU.MOREX.r3.5HG0424430.1295	HvPUT1	TF_motif_seq_0508	1428	-	ctGTACGgg	SBP	AT1G20980;AT1G27360;AT1G27370;AT1G53160;AT1G69170;AT1G76580;AT2G33810;AT2G42200;AT2G47070;AT3G15270;AT3G57920;AT3G60030;AT5G18830;AT5G43270;Os01g0292900;Os01g0922600;Os02g0139400;Os02g0174100;Os02g0177300;Os03g0833300;Os04g0551500;Os05g0408200;Os06g0659100;Os06g0663500;Os06g0703500;Os08g0509600;Os08g0513700;Os08g0531600;Os09g0491532;Os09g0507100;Os11g0496600
HORVU.MOREX.r3.5HG0424430.1296	HvPUT1	TF_motif_seq_0508	1453	+	agCATACaa	SBP	AT1G20980;AT1G27360;AT1G27370;AT1G53160;AT1G69170;AT1G76580;AT2G33810;AT2G42200;AT2G47070;AT3G15270;AT3G57920;AT3G60030;AT5G18830;AT5G43270;Os01g0292900;Os01g0922600;Os02g0139400;Os02g0174100;Os02g0177300;Os03g0833300;Os04g0551500;Os05g0408200;Os06g0659100;Os06g0663500;Os06g0703500;Os08g0509600;Os08g0513700;Os08g0531600;Os09g0491532;Os09g0507100;Os11g0496600
HORVU.MOREX.r3.5HG0424430.1297	HvPUT1	TFmatrixID_0643	304	-	gtTTGCTttttcttttcta	B3	AT5G60130
HORVU.MOREX.r3.5HG0424430.1298	HvPUT1	TFmatrixID_0645	1171	-	caagtGCATGaattt	B3	AT3G26790
HORVU.MOREX.r3.5HG0424430.1299	HvPUT1	TFmatrixID_0646	469	-	cgatgACCTGataact	B3	AT4G01500
HORVU.MOREX.r3.5HG0424430.1300	HvPUT1	TFmatrixID_0649	48	+	cAAGCA	B3	AT5G25475
HORVU.MOREX.r3.5HG0424430.1301	HvPUT1	TFmatrixID_0649	1059	-	TGCTTg	B3	AT5G25475
HORVU.MOREX.r3.5HG0424430.1302	HvPUT1	TFmatrixID_0660	57	+	tacacgttacctcCGCCGtct	AP2; ERF	AT3G20310
HORVU.MOREX.r3.5HG0424430.1303	HvPUT1	TFmatrixID_0663	65	+	acctCCGCCgtctggcaa	AP2; ERF	AT2G33710
HORVU.MOREX.r3.5HG0424430.1304	HvPUT1	TFmatrixID_0677	64	+	tacctcCGCCGtct	AP2; ERF	AT1G28160
HORVU.MOREX.r3.5HG0424430.1305	HvPUT1	TFmatrixID_0681	63	+	ttacctcCGCCGtct	AP2; ERF	AT1G28370
HORVU.MOREX.r3.5HG0424430.1306	HvPUT1	TFmatrixID_0686	62	+	gttacctCCGCCgtc	AP2; ERF	AT1G53170
HORVU.MOREX.r3.5HG0424430.1307	HvPUT1	TFmatrixID_0692	65	-	acctcCGCCGtctggcaac	AP2; ERF	AT5G25190
HORVU.MOREX.r3.5HG0424430.1308	HvPUT1	TFmatrixID_0693	63	+	ttacctcCGCCGtct	AP2; ERF	AT2G33710
HORVU.MOREX.r3.5HG0424430.1309	HvPUT1	TFmatrixID_0704	64	-	tacctcCGCCGtctg	AP2; ERF	AT5G25190
HORVU.MOREX.r3.5HG0424430.1310	HvPUT1	TFmatrixID_0712	63	-	ttacctcCGCCGtct	AP2; ERF	AT1G50640
HORVU.MOREX.r3.5HG0424430.1311	HvPUT1	TFmatrixID_0717	58	-	acacgttacctcCGCCGtct	AP2; ERF	AT1G50640
HORVU.MOREX.r3.5HG0424430.1312	HvPUT1	TFmatrixID_0719	60	-	acgttacctcCGCCGtctggcaacc	AP2; ERF	AT5G18560
HORVU.MOREX.r3.5HG0424430.1313	HvPUT1	TFmatrixID_0721	63	-	ttacctcCGCCGtct	AP2; ERF	AT1G43160
HORVU.MOREX.r3.5HG0424430.1314	HvPUT1	TFmatrixID_0734	63	+	ttacctcCGCCGtct	AP2; ERF	AT5G65130
HORVU.MOREX.r3.5HG0424430.1315	HvPUT1	TFmatrixID_0742	66	-	cctcCGCCGtctggcaaccac	AP2; ERF	AT5G44210
HORVU.MOREX.r3.5HG0424430.1316	HvPUT1	TFmatrixID_0744	63	-	ttacctcCGCCGtct	AP2; ERF	AT1G28160
HORVU.MOREX.r3.5HG0424430.1317	HvPUT1	TFmatrixID_0763	63	+	ttacctcCGCCGtct	AP2; ERF	AT5G18560
HORVU.MOREX.r3.5HG0424430.1318	HvPUT1	TFmatrixID_0767	65	+	acctcCGCCGtctggcaacca	AP2; ERF	AT5G13910
HORVU.MOREX.r3.5HG0424430.1319	HvPUT1	TFmatrixID_0791	1035	+	tctacTTAATt	ARID; Sox	AT1G76110
HORVU.MOREX.r3.5HG0424430.1320	HvPUT1	TFmatrixID_0804	565	-	cttCGTACcgct	bHLH	AT5G46830
HORVU.MOREX.r3.5HG0424430.1321	HvPUT1	TFmatrixID_0804	1426	+	tgctGTACGggc	bHLH	AT5G46830
HORVU.MOREX.r3.5HG0424430.1322	HvPUT1	TFmatrixID_0815	49	+	aagcaagataCACGTtacct	bHLH	AT1G64625
HORVU.MOREX.r3.5HG0424430.1323	HvPUT1	TFmatrixID_0832	617	+	atttgAGCTGtaaa	bZIP	AT1G06850
HORVU.MOREX.r3.5HG0424430.1324	HvPUT1	TFmatrixID_0833	56	-	ataCACGTtacctcc	bZIP	AT3G62420
HORVU.MOREX.r3.5HG0424430.1325	HvPUT1	TFmatrixID_0835	620	-	tgAGCTGtaaa	bZIP	AT2G40620
HORVU.MOREX.r3.5HG0424430.1326	HvPUT1	TFmatrixID_0836	56	+	ataCACGTtacctcc	bZIP	AT4G34590
HORVU.MOREX.r3.5HG0424430.1327	HvPUT1	TFmatrixID_0839	56	-	ataCACGTtacctcc	bZIP	AT5G15830
HORVU.MOREX.r3.5HG0424430.1328	HvPUT1	TFmatrixID_0841	56	-	ataCACGTtacctcc	bZIP	AT3G62420
HORVU.MOREX.r3.5HG0424430.1329	HvPUT1	TFmatrixID_0845	605	+	acGACAGccatgat	bZIP	AT1G06850
HORVU.MOREX.r3.5HG0424430.1330	HvPUT1	TFmatrixID_0852	56	-	ataCACGTtacctcc	bZIP	AT2G18160
HORVU.MOREX.r3.5HG0424430.1331	HvPUT1	TFmatrixID_0860	56	-	ataCACGTtacctcc	bZIP	AT2G18160
HORVU.MOREX.r3.5HG0424430.1332	HvPUT1	TFmatrixID_0866	619	-	ttgAGCTGtaaa	bZIP	AT1G43700
HORVU.MOREX.r3.5HG0424430.1333	HvPUT1	TFmatrixID_0867	56	-	ataCACGTtacctcc	bZIP	AT4G34590
HORVU.MOREX.r3.5HG0424430.1334	HvPUT1	TFmatrixID_0888	301	-	agggtttgctttttCTTTTct	Dof	AT5G02460
HORVU.MOREX.r3.5HG0424430.1335	HvPUT1	TFmatrixID_0888	1100	-	gaacttatgattatCTTTTtg	Dof	AT5G02460
HORVU.MOREX.r3.5HG0424430.1336	HvPUT1	TFmatrixID_0889	303	-	ggtttgCTTTTtcttttctat	Dof	AT5G62940
HORVU.MOREX.r3.5HG0424430.1337	HvPUT1	TFmatrixID_0889	707	-	atttacCTTTTatttattcaa	Dof	AT5G62940
HORVU.MOREX.r3.5HG0424430.1338	HvPUT1	TFmatrixID_0889	1024	-	catgtgCTTTTtctacttaat	Dof	AT5G62940
HORVU.MOREX.r3.5HG0424430.1339	HvPUT1	TFmatrixID_0889	1108	-	gattatCTTTTtgcatattat	Dof	AT5G62940
HORVU.MOREX.r3.5HG0424430.1340	HvPUT1	TFmatrixID_0890	305	+	tttgCTTTTtctttt	Dof	AT2G28810
HORVU.MOREX.r3.5HG0424430.1341	HvPUT1	TFmatrixID_0890	1026	+	tgtgCTTTTtctact	Dof	AT2G28810
HORVU.MOREX.r3.5HG0424430.1342	HvPUT1	TFmatrixID_0890	1110	+	ttatCTTTTtgcata	Dof	AT2G28810
HORVU.MOREX.r3.5HG0424430.1343	HvPUT1	TFmatrixID_0892	302	+	gggtttgCTTTTtcttttcta	Dof	AT3G52440
HORVU.MOREX.r3.5HG0424430.1344	HvPUT1	TFmatrixID_0892	1107	+	tgattatCTTTTtgcatatta	Dof	AT3G52440
HORVU.MOREX.r3.5HG0424430.1345	HvPUT1	TFmatrixID_0893	1100	+	gaacttatgattatCTTTTtg	Dof	AT2G28810
HORVU.MOREX.r3.5HG0424430.1346	HvPUT1	TFmatrixID_0894	299	+	gaagggtttgctttttCTTTTctatggag	Dof	AT5G66940
HORVU.MOREX.r3.5HG0424430.1347	HvPUT1	TFmatrixID_0894	697	+	ccatcagtgcatttacCTTTTatttattc	Dof	AT5G66940
HORVU.MOREX.r3.5HG0424430.1348	HvPUT1	TFmatrixID_0894	1098	+	tagaacttatgattatCTTTTtgcatatt	Dof	AT5G66940
HORVU.MOREX.r3.5HG0424430.1349	HvPUT1	TFmatrixID_0894	1347	-	ccctacttAAAAGacaatagtccaaacaa	Dof	AT5G66940
HORVU.MOREX.r3.5HG0424430.1350	HvPUT1	TFmatrixID_0894	1387	-	ttctccagAAAAGgaataaaacccaatcc	Dof	AT5G66940
HORVU.MOREX.r3.5HG0424430.1351	HvPUT1	TFmatrixID_0895	300	+	aagggtttgctttttCTTTTc	Dof	AT3G50410
HORVU.MOREX.r3.5HG0424430.1352	HvPUT1	TFmatrixID_0895	1099	+	agaacttatgattatCTTTTt	Dof	AT3G50410
HORVU.MOREX.r3.5HG0424430.1353	HvPUT1	TFmatrixID_0896	305	-	tttgCTTTTtc	Dof	AT1G64620
HORVU.MOREX.r3.5HG0424430.1354	HvPUT1	TFmatrixID_0896	1110	-	ttatCTTTTtg	Dof	AT1G64620
HORVU.MOREX.r3.5HG0424430.1355	HvPUT1	TFmatrixID_0897	301	+	agggtttgCTTTTtc	Dof	AT2G37590
HORVU.MOREX.r3.5HG0424430.1356	HvPUT1	TFmatrixID_0897	1106	+	atgattatCTTTTtg	Dof	AT2G37590
HORVU.MOREX.r3.5HG0424430.1357	HvPUT1	TFmatrixID_0899	301	+	agggtttgCTTTTtc	Dof	AT3G45610
HORVU.MOREX.r3.5HG0424430.1358	HvPUT1	TFmatrixID_0899	1106	+	atgattatCTTTTtg	Dof	AT3G45610
HORVU.MOREX.r3.5HG0424430.1359	HvPUT1	TFmatrixID_0900	305	+	tttgCTTTTtcttttctat	Dof	AT3G45610
HORVU.MOREX.r3.5HG0424430.1360	HvPUT1	TFmatrixID_0900	1026	+	tgtgCTTTTtctacttaat	Dof	AT3G45610
HORVU.MOREX.r3.5HG0424430.1361	HvPUT1	TFmatrixID_0900	1110	+	ttatCTTTTtgcatattat	Dof	AT3G45610
HORVU.MOREX.r3.5HG0424430.1362	HvPUT1	TFmatrixID_0901	305	+	tttgCTTTTtcttttctatgg	Dof	AT3G55370
HORVU.MOREX.r3.5HG0424430.1363	HvPUT1	TFmatrixID_0901	1026	+	tgtgCTTTTtctacttaatta	Dof	AT3G55370
HORVU.MOREX.r3.5HG0424430.1364	HvPUT1	TFmatrixID_0901	1110	+	ttatCTTTTtgcatattatac	Dof	AT3G55370
HORVU.MOREX.r3.5HG0424430.1365	HvPUT1	TFmatrixID_0902	301	+	agggtttgCTTTTtcttttct	Dof	AT5G66940
HORVU.MOREX.r3.5HG0424430.1366	HvPUT1	TFmatrixID_0902	1106	+	atgattatCTTTTtgcatatt	Dof	AT5G66940
HORVU.MOREX.r3.5HG0424430.1367	HvPUT1	TFmatrixID_0903	303	+	ggtttgCTTTTtcttttct	Dof	AT5G02460
HORVU.MOREX.r3.5HG0424430.1368	HvPUT1	TFmatrixID_0903	1108	+	gattatCTTTTtgcatatt	Dof	AT5G02460
HORVU.MOREX.r3.5HG0424430.1369	HvPUT1	TFmatrixID_0904	305	+	tttgCTTTTtcttttcta	Dof	AT3G47500
HORVU.MOREX.r3.5HG0424430.1370	HvPUT1	TFmatrixID_0904	1026	+	tgtgCTTTTtctacttaa	Dof	AT3G47500
HORVU.MOREX.r3.5HG0424430.1371	HvPUT1	TFmatrixID_0904	1110	+	ttatCTTTTtgcatatta	Dof	AT3G47500
HORVU.MOREX.r3.5HG0424430.1372	HvPUT1	TFmatrixID_0905	305	-	tttgCTTTTtc	Dof	AT2G46590
HORVU.MOREX.r3.5HG0424430.1373	HvPUT1	TFmatrixID_0905	1110	-	ttatCTTTTtg	Dof	AT2G46590
HORVU.MOREX.r3.5HG0424430.1374	HvPUT1	TFmatrixID_0906	303	-	ggtttgCTTTTtcttttct	Dof	AT5G60850
HORVU.MOREX.r3.5HG0424430.1375	HvPUT1	TFmatrixID_0906	1108	-	gattatCTTTTtgcatatt	Dof	AT5G60850
HORVU.MOREX.r3.5HG0424430.1376	HvPUT1	TFmatrixID_0907	302	-	gggtttgCTTTTtc	Dof	AT5G60850
HORVU.MOREX.r3.5HG0424430.1377	HvPUT1	TFmatrixID_0907	1107	-	tgattatCTTTTtg	Dof	AT5G60850
HORVU.MOREX.r3.5HG0424430.1378	HvPUT1	TFmatrixID_0908	303	-	ggtttgCTTTTtcttttct	Dof	AT1G64620
HORVU.MOREX.r3.5HG0424430.1379	HvPUT1	TFmatrixID_0908	1108	-	gattatCTTTTtgcatatt	Dof	AT1G64620
HORVU.MOREX.r3.5HG0424430.1380	HvPUT1	TFmatrixID_0909	300	-	aagggtttgCTTTTtcttttc	Dof	AT1G51700
HORVU.MOREX.r3.5HG0424430.1381	HvPUT1	TFmatrixID_0909	306	-	ttgctttttCTTTTctatgga	Dof	AT1G51700
HORVU.MOREX.r3.5HG0424430.1382	HvPUT1	TFmatrixID_0909	1021	-	ttccatgtgCTTTTtctactt	Dof	AT1G51700
HORVU.MOREX.r3.5HG0424430.1383	HvPUT1	TFmatrixID_0909	1105	-	tatgattatCTTTTtgcatat	Dof	AT1G51700
HORVU.MOREX.r3.5HG0424430.1384	HvPUT1	TFmatrixID_0910	303	-	ggtttgCTTTTtcttttctat	Dof	AT1G29160
HORVU.MOREX.r3.5HG0424430.1385	HvPUT1	TFmatrixID_0910	1024	-	catgtgCTTTTtctacttaat	Dof	AT1G29160
HORVU.MOREX.r3.5HG0424430.1386	HvPUT1	TFmatrixID_0910	1108	-	gattatCTTTTtgcatattat	Dof	AT1G29160
HORVU.MOREX.r3.5HG0424430.1387	HvPUT1	TFmatrixID_0911	1108	-	gattatCTTTTtg	Dof	AT2G46590
HORVU.MOREX.r3.5HG0424430.1388	HvPUT1	TFmatrixID_0912	303	+	ggtttgCTTTTtcttttctatggagcg	Dof	AT1G69570
HORVU.MOREX.r3.5HG0424430.1389	HvPUT1	TFmatrixID_0912	707	+	atttacCTTTTatttattcaacacatt	Dof	AT1G69570
HORVU.MOREX.r3.5HG0424430.1390	HvPUT1	TFmatrixID_0913	303	-	ggtttgCTTTTtcttttct	Dof	AT3G47500
HORVU.MOREX.r3.5HG0424430.1391	HvPUT1	TFmatrixID_0913	1024	-	catgtgCTTTTtctactta	Dof	AT3G47500
HORVU.MOREX.r3.5HG0424430.1392	HvPUT1	TFmatrixID_0913	1108	-	gattatCTTTTtgcatatt	Dof	AT3G47500
HORVU.MOREX.r3.5HG0424430.1393	HvPUT1	TFmatrixID_0914	306	-	ttgCTTTTtcttttc	Dof	AT2G37590
HORVU.MOREX.r3.5HG0424430.1394	HvPUT1	TFmatrixID_0914	1111	-	tatCTTTTtgcatat	Dof	AT2G37590
HORVU.MOREX.r3.5HG0424430.1395	HvPUT1	TFmatrixID_0915	1093	+	gtttctagaacttatgattatCTTTTtg	Dof	AT4G38000
HORVU.MOREX.r3.5HG0424430.1396	HvPUT1	TFmatrixID_0916	308	+	gctttttCTTTTcta	Dof	AT1G47655
HORVU.MOREX.r3.5HG0424430.1397	HvPUT1	TFmatrixID_0918	307	-	tgCTTTTtcttttctatggag	Dof	AT1G69570
HORVU.MOREX.r3.5HG0424430.1398	HvPUT1	TFmatrixID_0919	303	+	ggtttgctttttCTTTTct	Dof	AT3G55370
HORVU.MOREX.r3.5HG0424430.1399	HvPUT1	TFmatrixID_0919	1102	+	acttatgattatCTTTTtg	Dof	AT3G55370
HORVU.MOREX.r3.5HG0424430.1400	HvPUT1	TFmatrixID_0920	305	-	tttgCTTTTtc	Dof	AT4G38000
HORVU.MOREX.r3.5HG0424430.1401	HvPUT1	TFmatrixID_0920	1110	-	ttatCTTTTtg	Dof	AT4G38000
HORVU.MOREX.r3.5HG0424430.1402	HvPUT1	TFmatrixID_0921	301	+	agggtttgCTTTTtc	Dof	AT1G29160
HORVU.MOREX.r3.5HG0424430.1403	HvPUT1	TFmatrixID_0921	1022	+	tccatgtgCTTTTtc	Dof	AT1G29160
HORVU.MOREX.r3.5HG0424430.1404	HvPUT1	TFmatrixID_0921	1106	+	atgattatCTTTTtg	Dof	AT1G29160
HORVU.MOREX.r3.5HG0424430.1405	HvPUT1	TFmatrixID_0922	301	-	agggtttgCTTTTtcttttct	Dof	AT1G51700
HORVU.MOREX.r3.5HG0424430.1406	HvPUT1	TFmatrixID_0922	1106	-	atgattatCTTTTtgcatatt	Dof	AT1G51700
HORVU.MOREX.r3.5HG0424430.1407	HvPUT1	TFmatrixID_0923	226	+	aagaAAAGTag	Dof	AT1G47655
HORVU.MOREX.r3.5HG0424430.1408	HvPUT1	TFmatrixID_0923	744	+	cttaAAAGTag	Dof	AT1G47655
HORVU.MOREX.r3.5HG0424430.1409	HvPUT1	TFmatrixID_0924	705	-	gcatttacCTTTTatttat	Dof	AT4G21030
HORVU.MOREX.r3.5HG0424430.1410	HvPUT1	TFmatrixID_0924	1106	-	atgattatCTTTTtgcata	Dof	AT4G21030
HORVU.MOREX.r3.5HG0424430.1411	HvPUT1	TFmatrixID_0932	420	-	ggcccAGATCacgaa	GATA	AT3G60530
HORVU.MOREX.r3.5HG0424430.1412	HvPUT1	TFmatrixID_0945	1105	+	tATGATta	YABBY	AT1G69180
HORVU.MOREX.r3.5HG0424430.1413	HvPUT1	TFmatrixID_0945	1224	+	tATGATta	YABBY	AT1G69180
HORVU.MOREX.r3.5HG0424430.1414	HvPUT1	TFmatrixID_0945	1256	+	aATGATta	YABBY	AT1G69180
HORVU.MOREX.r3.5HG0424430.1415	HvPUT1	TFmatrixID_0945	1323	-	taATCATa	YABBY	AT1G69180
HORVU.MOREX.r3.5HG0424430.1416	HvPUT1	TFmatrixID_0948	623	-	gctgtaaaGACAAtt	C2H2	AT2G01940
HORVU.MOREX.r3.5HG0424430.1417	HvPUT1	TFmatrixID_0948	1351	-	acttaaaaGACAAta	C2H2	AT2G01940
HORVU.MOREX.r3.5HG0424430.1418	HvPUT1	TFmatrixID_0951	824	-	ttatTTGGTggtttgtttt	C2H2	AT4G26030
HORVU.MOREX.r3.5HG0424430.1419	HvPUT1	TFmatrixID_0955	1351	-	acttaaaaGACAAtagt	C2H2	AT5G66730
HORVU.MOREX.r3.5HG0424430.1420	HvPUT1	TFmatrixID_0959	1351	-	acttaaaaGACAAtagtc	C2H2	AT1G03840
HORVU.MOREX.r3.5HG0424430.1421	HvPUT1	TFmatrixID_0961	1351	-	acttaaaaGACAAtagtc	C2H2	AT3G13810
HORVU.MOREX.r3.5HG0424430.1422	HvPUT1	TFmatrixID_0963	1352	+	cttaaaaGACAAtag	C2H2	AT2G01940
HORVU.MOREX.r3.5HG0424430.1423	HvPUT1	TFmatrixID_0965	1351	-	acttaaaaGACAAtagtc	C2H2	AT3G50700
HORVU.MOREX.r3.5HG0424430.1424	HvPUT1	TFmatrixID_0970	1352	-	cttaaaaGACAAtagtccaaa	C2H2	AT3G13810
HORVU.MOREX.r3.5HG0424430.1425	HvPUT1	TFmatrixID_0971	1471	-	taatcTGGGGacgga	C2H2	AT1G34370
HORVU.MOREX.r3.5HG0424430.1426	HvPUT1	TFmatrixID_0973	286	-	gagGAGGAggaaggaaggg	C2H2	AT1G72050
HORVU.MOREX.r3.5HG0424430.1427	HvPUT1	TFmatrixID_0974	1351	-	acttaaaaGACAAtagtcca	C2H2	AT5G44160
HORVU.MOREX.r3.5HG0424430.1428	HvPUT1	TFmatrixID_0975	1351	-	acttaaaaGACAAtagt	C2H2	AT5G44160
HORVU.MOREX.r3.5HG0424430.1429	HvPUT1	TFmatrixID_0977	650	+	TTGAAaa	C2H2	AT2G41835
HORVU.MOREX.r3.5HG0424430.1430	HvPUT1	TFmatrixID_0981	485	+	GAAATct	C2H2	AT3G49930
HORVU.MOREX.r3.5HG0424430.1431	HvPUT1	TFmatrixID_0983	1466	-	gcgcttaatcTGGGGacgg	C2H2	AT1G34370
HORVU.MOREX.r3.5HG0424430.1432	HvPUT1	TFmatrixID_0985	305	-	tttgCTTTTtc	C3H Zinc finger	AT5G63260
HORVU.MOREX.r3.5HG0424430.1433	HvPUT1	TFmatrixID_0985	1110	-	ttatCTTTTtg	C3H Zinc finger	AT5G63260
HORVU.MOREX.r3.5HG0424430.1434	HvPUT1	TFmatrixID_0986	305	-	tttgCTTTTtcttt	C3H Zinc finger	AT3G12130
HORVU.MOREX.r3.5HG0424430.1435	HvPUT1	TFmatrixID_0986	1110	-	ttatCTTTTtgcat	C3H Zinc finger	AT3G12130
HORVU.MOREX.r3.5HG0424430.1436	HvPUT1	TFmatrixID_0988	305	-	tttgCTTTTtc	C3H Zinc finger	AT5G63260
HORVU.MOREX.r3.5HG0424430.1437	HvPUT1	TFmatrixID_0988	1110	-	ttatCTTTTtg	C3H Zinc finger	AT5G63260
HORVU.MOREX.r3.5HG0424430.1438	HvPUT1	TFmatrixID_0991	724	+	TCAACa	C3H Zinc finger	AT5G58620
HORVU.MOREX.r3.5HG0424430.1439	HvPUT1	TFmatrixID_0992	724	-	tCAACAc	C3H	AT5G42820
HORVU.MOREX.r3.5HG0424430.1440	HvPUT1	TFmatrixID_0992	816	+	tTGTTGg	C3H	AT5G42820
HORVU.MOREX.r3.5HG0424430.1441	HvPUT1	TFmatrixID_0993	181	+	agcgattgtctgGATAAgag	C3H	AT1G74370
HORVU.MOREX.r3.5HG0424430.1442	HvPUT1	TFmatrixID_0993	1107	-	tgaTTATCtttttgcatatt	C3H	AT1G74370
HORVU.MOREX.r3.5HG0424430.1443	HvPUT1	TFmatrixID_1000	1244	-	tTTTAAattttaaa	TCR; CPP	AT4G14770
HORVU.MOREX.r3.5HG0424430.1444	HvPUT1	TFmatrixID_1000	1245	+	tttaaattTTAAAt	TCR; CPP	AT4G14770
HORVU.MOREX.r3.5HG0424430.1445	HvPUT1	TFmatrixID_1001	1243	+	ttTTTAAattttaaa	TCR; CPP	AT3G22760
HORVU.MOREX.r3.5HG0424430.1446	HvPUT1	TFmatrixID_1001	1245	-	tttaaattTTAAAtg	TCR; CPP	AT3G22760
HORVU.MOREX.r3.5HG0424430.1447	HvPUT1	TFmatrixID_1002	1244	+	ttttaaatTTTAAat	TCR; CPP	AT3G22760
HORVU.MOREX.r3.5HG0424430.1448	HvPUT1	TFmatrixID_1002	1244	-	ttTTAAAttttaaat	TCR; CPP	AT3G22760
HORVU.MOREX.r3.5HG0424430.1449	HvPUT1	TFmatrixID_1003	1243	+	tttttAAATTttaaa	TCR; CPP	AT4G14770
HORVU.MOREX.r3.5HG0424430.1450	HvPUT1	TFmatrixID_1003	1244	-	ttttaAATTTtaaat	TCR; CPP	AT4G14770
HORVU.MOREX.r3.5HG0424430.1451	HvPUT1	TFmatrixID_1003	1263	-	atttcAATTTctatt	TCR; CPP	AT4G14770
HORVU.MOREX.r3.5HG0424430.1452	HvPUT1	TFmatrixID_1004	1244	+	tTTTAAattttaaat	TCR; CPP	AT2G20110
HORVU.MOREX.r3.5HG0424430.1453	HvPUT1	TFmatrixID_1004	1244	-	ttttaaattTTAAAt	TCR; CPP	AT2G20110
HORVU.MOREX.r3.5HG0424430.1454	HvPUT1	TFmatrixID_1005	1243	+	tttttaaattTTAAA	TCR; CPP	AT3G22780
HORVU.MOREX.r3.5HG0424430.1455	HvPUT1	TFmatrixID_1005	1245	-	TTTAAattttaaatg	TCR; CPP	AT3G22780
HORVU.MOREX.r3.5HG0424430.1456	HvPUT1	TFmatrixID_1046	958	-	tgTTTTCgt	Myb/SANT	AT3G13040
HORVU.MOREX.r3.5HG0424430.1457	HvPUT1	TFmatrixID_1050	189	-	tctgGATAAgaga	Storekeeper	AT4G00250
HORVU.MOREX.r3.5HG0424430.1458	HvPUT1	TFmatrixID_1051	183	-	cgattgtcTGGATaagaga	GeBP	AT1G66420
HORVU.MOREX.r3.5HG0424430.1459	HvPUT1	TFmatrixID_1054	567	-	tcgtaccgCTGACac	GRF	AT2G45480
HORVU.MOREX.r3.5HG0424430.1460	HvPUT1	TFmatrixID_1059	1255	+	aaaTGATTat	Homeodomain; bZIP; HD-ZIP	AT5G65310
HORVU.MOREX.r3.5HG0424430.1461	HvPUT1	TFmatrixID_1063	1099	-	agaacttATGATtat	bZIP; Homeodomain; HD-ZIP	AT1G30490
HORVU.MOREX.r3.5HG0424430.1462	HvPUT1	TFmatrixID_1063	1218	-	atatattATGATtaa	bZIP; Homeodomain; HD-ZIP	AT1G30490
HORVU.MOREX.r3.5HG0424430.1463	HvPUT1	TFmatrixID_1063	1250	-	attttaaATGATtat	bZIP; Homeodomain; HD-ZIP	AT1G30490
HORVU.MOREX.r3.5HG0424430.1464	HvPUT1	TFmatrixID_1066	1099	+	agaacttATGATtat	bZIP; Homeodomain; HD-ZIP	AT1G52150
HORVU.MOREX.r3.5HG0424430.1465	HvPUT1	TFmatrixID_1066	1218	+	atatattATGATtaa	bZIP; Homeodomain; HD-ZIP	AT1G52150
HORVU.MOREX.r3.5HG0424430.1466	HvPUT1	TFmatrixID_1066	1250	+	attttaaATGATtat	bZIP; Homeodomain; HD-ZIP	AT1G52150
HORVU.MOREX.r3.5HG0424430.1467	HvPUT1	TFmatrixID_1069	1038	+	acTTAATtatg	WOX	AT3G03660
HORVU.MOREX.r3.5HG0424430.1468	HvPUT1	TFmatrixID_1071	55	-	gatacacgttacctCCGCCgt	Sox	AT4G11080
HORVU.MOREX.r3.5HG0424430.1469	HvPUT1	TFmatrixID_1075	612	-	ccaTGATTtga	Homeodomain; HD-ZIP	AT5G47370
HORVU.MOREX.r3.5HG0424430.1470	HvPUT1	TFmatrixID_1075	1104	-	ttaTGATTatc	Homeodomain; HD-ZIP	AT5G47370
HORVU.MOREX.r3.5HG0424430.1471	HvPUT1	TFmatrixID_1075	1223	-	ttaTGATTaat	Homeodomain; HD-ZIP	AT5G47370
HORVU.MOREX.r3.5HG0424430.1472	HvPUT1	TFmatrixID_1075	1255	-	aaaTGATTatt	Homeodomain; HD-ZIP	AT5G47370
HORVU.MOREX.r3.5HG0424430.1473	HvPUT1	TFmatrixID_1075	1321	+	attAATCAtat	Homeodomain; HD-ZIP	AT5G47370
HORVU.MOREX.r3.5HG0424430.1474	HvPUT1	TFmatrixID_1076	1254	+	taaaTGATTattt	Homeodomain; HD-ZIP	AT2G46680
HORVU.MOREX.r3.5HG0424430.1475	HvPUT1	TFmatrixID_1077	1253	-	ttaaATGATta	Homeodomain; HD-ZIP	AT2G22430
HORVU.MOREX.r3.5HG0424430.1476	HvPUT1	TFmatrixID_1079	1103	-	cttATGATtat	Homeodomain; HD-ZIP	AT5G47370
HORVU.MOREX.r3.5HG0424430.1477	HvPUT1	TFmatrixID_1079	1222	-	attATGATtaa	Homeodomain; HD-ZIP	AT5G47370
HORVU.MOREX.r3.5HG0424430.1478	HvPUT1	TFmatrixID_1079	1254	-	taaATGATtat	Homeodomain; HD-ZIP	AT5G47370
HORVU.MOREX.r3.5HG0424430.1479	HvPUT1	TFmatrixID_1079	1322	+	ttaATCATata	Homeodomain; HD-ZIP	AT5G47370
HORVU.MOREX.r3.5HG0424430.1480	HvPUT1	TFmatrixID_1080	1254	+	taaATGATtat	HD-ZIP	AT1G70920
HORVU.MOREX.r3.5HG0424430.1481	HvPUT1	TFmatrixID_1085	1254	-	taaATGATtat	HD-ZIP	AT1G70920
HORVU.MOREX.r3.5HG0424430.1482	HvPUT1	TFmatrixID_1091	1103	+	cttATGATtatcttt	Homeodomain; HD-ZIP	AT4G17460
HORVU.MOREX.r3.5HG0424430.1483	HvPUT1	TFmatrixID_1091	1222	+	attATGATtaatatg	Homeodomain; HD-ZIP	AT4G17460
HORVU.MOREX.r3.5HG0424430.1484	HvPUT1	TFmatrixID_1091	1254	+	taaATGATtatttca	Homeodomain; HD-ZIP	AT4G17460
HORVU.MOREX.r3.5HG0424430.1485	HvPUT1	TFmatrixID_1091	1318	-	cgtattaATCATata	Homeodomain; HD-ZIP	AT4G17460
HORVU.MOREX.r3.5HG0424430.1486	HvPUT1	TFmatrixID_1092	611	+	gccATGATttg	Homeodomain; HD-ZIP	AT4G17460
HORVU.MOREX.r3.5HG0424430.1487	HvPUT1	TFmatrixID_1092	1103	+	cttATGATtat	Homeodomain; HD-ZIP	AT4G17460
HORVU.MOREX.r3.5HG0424430.1488	HvPUT1	TFmatrixID_1092	1222	+	attATGATtaa	Homeodomain; HD-ZIP	AT4G17460
HORVU.MOREX.r3.5HG0424430.1489	HvPUT1	TFmatrixID_1092	1254	+	taaATGATtat	Homeodomain; HD-ZIP	AT4G17460
HORVU.MOREX.r3.5HG0424430.1490	HvPUT1	TFmatrixID_1092	1322	-	ttaATCATata	Homeodomain; HD-ZIP	AT4G17460
HORVU.MOREX.r3.5HG0424430.1491	HvPUT1	TFmatrixID_1093	1105	-	taTGATTatc	Homeodomain; HD-ZIP	AT4G37790
HORVU.MOREX.r3.5HG0424430.1492	HvPUT1	TFmatrixID_1093	1224	-	taTGATTaat	Homeodomain; HD-ZIP	AT4G37790
HORVU.MOREX.r3.5HG0424430.1493	HvPUT1	TFmatrixID_1093	1256	-	aaTGATTatt	Homeodomain; HD-ZIP	AT4G37790
HORVU.MOREX.r3.5HG0424430.1494	HvPUT1	TFmatrixID_1093	1321	+	attAATCAta	Homeodomain; HD-ZIP	AT4G37790
HORVU.MOREX.r3.5HG0424430.1495	HvPUT1	TFmatrixID_1096	903	+	CTAGAa	HSF	AT5G16820
HORVU.MOREX.r3.5HG0424430.1496	HvPUT1	TFmatrixID_1096	1095	-	tTCTAG	HSF	AT5G16820
HORVU.MOREX.r3.5HG0424430.1497	HvPUT1	TFmatrixID_1096	1097	+	CTAGAa	HSF	AT5G16820
HORVU.MOREX.r3.5HG0424430.1498	HvPUT1	TFmatrixID_1103	1091	+	aggtTTCTAgaac	HSF	AT2G41690
HORVU.MOREX.r3.5HG0424430.1499	HvPUT1	TFmatrixID_1103	1094	-	tttcTAGAActta	HSF	AT2G41690
HORVU.MOREX.r3.5HG0424430.1500	HvPUT1	TFmatrixID_1105	1086	+	tattaaggttTCTAGaact	HSF	AT4G18880
HORVU.MOREX.r3.5HG0424430.1501	HvPUT1	TFmatrixID_1105	1093	-	gtttCTAGAacttatgatt	HSF	AT4G18880
HORVU.MOREX.r3.5HG0424430.1502	HvPUT1	TFmatrixID_1111	1089	-	taaggttTCTAGaac	HSF	AT2G41690
HORVU.MOREX.r3.5HG0424430.1503	HvPUT1	TFmatrixID_1111	1094	+	tttCTAGAacttatg	HSF	AT2G41690
HORVU.MOREX.r3.5HG0424430.1504	HvPUT1	TFmatrixID_1112	616	-	gaTTTGA	(Others)	AT2G39900
HORVU.MOREX.r3.5HG0424430.1505	HvPUT1	TFmatrixID_1128	641	-	TTTCCgtatttgaaa	MADS box; MIKC	AT2G22540
HORVU.MOREX.r3.5HG0424430.1506	HvPUT1	TFmatrixID_1129	639	+	ttTTTCCgtatttga	MADS box; MIKC	AT2G22540
HORVU.MOREX.r3.5HG0424430.1507	HvPUT1	TFmatrixID_1130	640	+	tTTTCCgtatttgaaaata	MADS box; MIKC	AT5G13790
HORVU.MOREX.r3.5HG0424430.1508	HvPUT1	TFmatrixID_1131	638	+	tttTTTCCgtatttgaaaata	MADS box; MIKC	AT5G13790
HORVU.MOREX.r3.5HG0424430.1509	HvPUT1	TFmatrixID_1132	638	-	tttTTTCCgtatttgaaaa	MADS box; MIKC	AT2G45650
HORVU.MOREX.r3.5HG0424430.1510	HvPUT1	TFmatrixID_1133	641	+	TTTCCgtatttgaaa	MADS box; MIKC	AT3G57230
HORVU.MOREX.r3.5HG0424430.1511	HvPUT1	TFmatrixID_1134	639	+	ttTTTCCgtatttgaaaa	MADS box; MIKC	AT5G10140
HORVU.MOREX.r3.5HG0424430.1512	HvPUT1	TFmatrixID_1134	1440	+	caTTTCCattaccagcat	MADS box; MIKC	AT5G10140
HORVU.MOREX.r3.5HG0424430.1513	HvPUT1	TFmatrixID_1135	640	+	tTTTCCgtatttgaa	MADS box; MIKC	AT5G10140
HORVU.MOREX.r3.5HG0424430.1514	HvPUT1	TFmatrixID_1138	640	+	tTTTCCgtatttgaaaatatt	MADS box; MIKC	AT3G57230
HORVU.MOREX.r3.5HG0424430.1515	HvPUT1	TFmatrixID_1142	808	-	tAACCGatttgttgg	Myb/SANT	AT3G50060
HORVU.MOREX.r3.5HG0424430.1516	HvPUT1	TFmatrixID_1142	1185	+	ttggtttttCGGTTa	Myb/SANT	AT3G50060
HORVU.MOREX.r3.5HG0424430.1517	HvPUT1	TFmatrixID_1143	807	+	tTAACCgattt	Myb/SANT	AT5G06100
HORVU.MOREX.r3.5HG0424430.1518	HvPUT1	TFmatrixID_1143	1190	-	ttttcGGTTAa	Myb/SANT	AT5G06100
HORVU.MOREX.r3.5HG0424430.1519	HvPUT1	TFmatrixID_1143	1197	+	tTAACCgaaca	Myb/SANT	AT5G06100
HORVU.MOREX.r3.5HG0424430.1520	HvPUT1	TFmatrixID_1146	818	+	gttggtttatTTGGTggtttg	Myb/SANT; MYB	AT1G16490
HORVU.MOREX.r3.5HG0424430.1521	HvPUT1	TFmatrixID_1151	137	+	cgtcCCTAAcgact	MYB	AT3G01530
HORVU.MOREX.r3.5HG0424430.1522	HvPUT1	TFmatrixID_1153	776	+	aAACCGaaaaacca	Myb/SANT	AT2G23290
HORVU.MOREX.r3.5HG0424430.1523	HvPUT1	TFmatrixID_1153	882	-	tttttgttCGGTTt	Myb/SANT	AT2G23290
HORVU.MOREX.r3.5HG0424430.1524	HvPUT1	TFmatrixID_1153	1186	-	tggtttttCGGTTa	Myb/SANT	AT2G23290
HORVU.MOREX.r3.5HG0424430.1525	HvPUT1	TFmatrixID_1153	1198	+	tAACCGaacaaacc	Myb/SANT	AT2G23290
HORVU.MOREX.r3.5HG0424430.1526	HvPUT1	TFmatrixID_1153	1314	+	gAACCGtattaatc	Myb/SANT	AT2G23290
HORVU.MOREX.r3.5HG0424430.1527	HvPUT1	TFmatrixID_1155	803	+	tgtattAACCGattt	Myb/SANT; MYB	AT2G32460
HORVU.MOREX.r3.5HG0424430.1528	HvPUT1	TFmatrixID_1155	1190	-	ttttCGGTTaaccga	Myb/SANT; MYB	AT2G32460
HORVU.MOREX.r3.5HG0424430.1529	HvPUT1	TFmatrixID_1157	1186	-	tggtttttCGGTTaa	Myb/SANT	AT3G11440
HORVU.MOREX.r3.5HG0424430.1530	HvPUT1	TFmatrixID_1157	1197	+	ttAACCGaacaaacc	Myb/SANT	AT3G11440
HORVU.MOREX.r3.5HG0424430.1531	HvPUT1	TFmatrixID_1158	808	+	tAACCGatttg	Myb/SANT	AT4G37260
HORVU.MOREX.r3.5HG0424430.1532	HvPUT1	TFmatrixID_1158	1189	-	tttttCGGTTa	Myb/SANT	AT4G37260
HORVU.MOREX.r3.5HG0424430.1533	HvPUT1	TFmatrixID_1158	1198	+	tAACCGaacaa	Myb/SANT	AT4G37260
HORVU.MOREX.r3.5HG0424430.1534	HvPUT1	TFmatrixID_1159	57	-	tacacGTTACctccg	Myb/SANT; MYB	AT5G58850
HORVU.MOREX.r3.5HG0424430.1535	HvPUT1	TFmatrixID_1160	137	-	cgtcCCTAAcgac	Myb/SANT; MYB	AT1G25340
HORVU.MOREX.r3.5HG0424430.1536	HvPUT1	TFmatrixID_1165	10	+	gaagGAGCGaggc	Myb/SANT; MYB	AT2G02820
HORVU.MOREX.r3.5HG0424430.1537	HvPUT1	TFmatrixID_1165	321	+	tatgGAGCGatcg	Myb/SANT; MYB	AT2G02820
HORVU.MOREX.r3.5HG0424430.1538	HvPUT1	TFmatrixID_1166	57	+	tacaCGTTAcc	Myb/SANT; MYB	AT5G58850
HORVU.MOREX.r3.5HG0424430.1539	HvPUT1	TFmatrixID_1168	57	-	tacacGTTACctccg	Myb/SANT; MYB	AT4G18770
HORVU.MOREX.r3.5HG0424430.1540	HvPUT1	TFmatrixID_1173	57	-	tacacGTTACctccg	Myb/SANT; MYB	AT3G27785
HORVU.MOREX.r3.5HG0424430.1541	HvPUT1	TFmatrixID_1178	807	+	ttAACCGattt	Myb/SANT; MYB	AT2G26960
HORVU.MOREX.r3.5HG0424430.1542	HvPUT1	TFmatrixID_1182	804	+	gtattAACCGatt	Myb/SANT	AT3G11440
HORVU.MOREX.r3.5HG0424430.1543	HvPUT1	TFmatrixID_1182	1191	-	tttCGGTTaaccg	Myb/SANT	AT3G11440
HORVU.MOREX.r3.5HG0424430.1544	HvPUT1	TFmatrixID_1182	1194	+	cggttAACCGaac	Myb/SANT	AT3G11440
HORVU.MOREX.r3.5HG0424430.1545	HvPUT1	TFmatrixID_1189	814	-	atttGTTGGtttatt	Myb/SANT	AT3G28910
HORVU.MOREX.r3.5HG0424430.1546	HvPUT1	TFmatrixID_1202	479	-	ATAACtgaaat	MYB	AT1G66370
HORVU.MOREX.r3.5HG0424430.1547	HvPUT1	TFmatrixID_1203	804	+	gtattAACCGattt	Myb/SANT; MYB	AT2G26960
HORVU.MOREX.r3.5HG0424430.1548	HvPUT1	TFmatrixID_1204	806	+	attAACCGatt	Myb/SANT; MYB	AT5G67300
HORVU.MOREX.r3.5HG0424430.1549	HvPUT1	TFmatrixID_1204	1191	-	tttCGGTTaac	Myb/SANT; MYB	AT5G67300
HORVU.MOREX.r3.5HG0424430.1550	HvPUT1	TFmatrixID_1208	764	+	ctataaAACCGaaaa	Myb/SANT; MYB	AT2G32460
HORVU.MOREX.r3.5HG0424430.1551	HvPUT1	TFmatrixID_1208	771	+	accgaaAACCGaaaa	Myb/SANT; MYB	AT2G32460
HORVU.MOREX.r3.5HG0424430.1552	HvPUT1	TFmatrixID_1208	784	+	aaaccaAACCGaacc	Myb/SANT; MYB	AT2G32460
HORVU.MOREX.r3.5HG0424430.1553	HvPUT1	TFmatrixID_1208	789	+	aaaccgAACCGaact	Myb/SANT; MYB	AT2G32460
HORVU.MOREX.r3.5HG0424430.1554	HvPUT1	TFmatrixID_1208	803	+	tgtattAACCGattt	Myb/SANT; MYB	AT2G32460
HORVU.MOREX.r3.5HG0424430.1555	HvPUT1	TFmatrixID_1208	886	-	tgttCGGTTtttggt	Myb/SANT; MYB	AT2G32460
HORVU.MOREX.r3.5HG0424430.1556	HvPUT1	TFmatrixID_1208	1190	-	ttttCGGTTaaccga	Myb/SANT; MYB	AT2G32460
HORVU.MOREX.r3.5HG0424430.1557	HvPUT1	TFmatrixID_1208	1193	+	tcggttAACCGaaca	Myb/SANT; MYB	AT2G32460
HORVU.MOREX.r3.5HG0424430.1558	HvPUT1	TFmatrixID_1208	1202	+	cgaacaAACCGaact	Myb/SANT; MYB	AT2G32460
HORVU.MOREX.r3.5HG0424430.1559	HvPUT1	TFmatrixID_1208	1236	-	ggttCGGTTtttaaa	Myb/SANT; MYB	AT2G32460
HORVU.MOREX.r3.5HG0424430.1560	HvPUT1	TFmatrixID_1208	1304	+	tgaataAACCGaacc	Myb/SANT; MYB	AT2G32460
HORVU.MOREX.r3.5HG0424430.1561	HvPUT1	TFmatrixID_1208	1309	+	aaaccgAACCGtatt	Myb/SANT; MYB	AT2G32460
HORVU.MOREX.r3.5HG0424430.1562	HvPUT1	TFmatrixID_1208	1327	+	catataAACCGaacg	Myb/SANT; MYB	AT2G32460
HORVU.MOREX.r3.5HG0424430.1563	HvPUT1	TFmatrixID_1211	821	+	ggtttatTTGGTggt	Myb/SANT; MYB	AT4G38620
HORVU.MOREX.r3.5HG0424430.1564	HvPUT1	TFmatrixID_1212	825	-	tatTTGGTggtttgttttttg	Myb/SANT	AT3G23250
HORVU.MOREX.r3.5HG0424430.1565	HvPUT1	TFmatrixID_1213	74	+	gtctggCAACCacacatcc	Myb/SANT	AT1G08810
HORVU.MOREX.r3.5HG0424430.1566	HvPUT1	TFmatrixID_1214	827	-	tttGGTGGtttgtt	MYB	AT4G01680
HORVU.MOREX.r3.5HG0424430.1567	HvPUT1	TFmatrixID_1216	332	-	cggCCTAAttgggct	Myb/SANT; MYB	AT1G68320
HORVU.MOREX.r3.5HG0424430.1568	HvPUT1	TFmatrixID_1216	359	-	gggCCTAAatgcacc	Myb/SANT; MYB	AT1G68320
HORVU.MOREX.r3.5HG0424430.1569	HvPUT1	TFmatrixID_1217	53	+	aagatacacGTTACctc	Myb/SANT; MYB	AT3G27785
HORVU.MOREX.r3.5HG0424430.1570	HvPUT1	TFmatrixID_1218	333	-	ggCCTAAttgggctt	Myb/SANT; MYB	AT1G25340
HORVU.MOREX.r3.5HG0424430.1571	HvPUT1	TFmatrixID_1218	360	-	ggCCTAAatgcacca	Myb/SANT; MYB	AT1G25340
HORVU.MOREX.r3.5HG0424430.1572	HvPUT1	TFmatrixID_1226	784	-	aaaccaAACCGaaccgaact	Myb/SANT	AT3G50060
HORVU.MOREX.r3.5HG0424430.1573	HvPUT1	TFmatrixID_1226	881	+	gtttttgttCGGTTtttggt	Myb/SANT	AT3G50060
HORVU.MOREX.r3.5HG0424430.1574	HvPUT1	TFmatrixID_1226	1309	-	aaaccgAACCGtattaatca	Myb/SANT	AT3G50060
HORVU.MOREX.r3.5HG0424430.1575	HvPUT1	TFmatrixID_1229	652	+	gaaAATATttgg	Myb/SANT; MYB-related	AT1G18330
HORVU.MOREX.r3.5HG0424430.1576	HvPUT1	TFmatrixID_1230	1081	-	aatgATATTaaggtt	Myb/SANT	AT3G10113
HORVU.MOREX.r3.5HG0424430.1577	HvPUT1	TFmatrixID_1231	1081	-	aatgATATTaaggt	MYB-related	AT5G17300
HORVU.MOREX.r3.5HG0424430.1578	HvPUT1	TFmatrixID_1233	189	-	tctgGATAAgagagta	Myb/SANT; MYB-related	AT5G56840
HORVU.MOREX.r3.5HG0424430.1579	HvPUT1	TFmatrixID_1234	190	-	ctgGATAAgagagta	Myb/SANT; MYB	AT1G49010
HORVU.MOREX.r3.5HG0424430.1580	HvPUT1	TFmatrixID_1235	1106	+	atgaTTATCtttttg	Myb/SANT; MYB-related	AT5G58900
HORVU.MOREX.r3.5HG0424430.1581	HvPUT1	TFmatrixID_1239	189	-	tctgGATAAgagagt	Myb/SANT	AT5G47390
HORVU.MOREX.r3.5HG0424430.1582	HvPUT1	TFmatrixID_1240	188	-	gtctgGATAAgaga	Myb/SANT	AT1G19000
HORVU.MOREX.r3.5HG0424430.1583	HvPUT1	TFmatrixID_1245	188	+	gtctGGATAagaga	Myb/SANT	AT1G19000
HORVU.MOREX.r3.5HG0424430.1584	HvPUT1	TFmatrixID_1246	189	-	tctgGATAAga	Myb/SANT; MYB-related	AT5G61620
HORVU.MOREX.r3.5HG0424430.1585	HvPUT1	TFmatrixID_1248	189	+	tctGGATAaga	Myb/SANT	AT1G74840
HORVU.MOREX.r3.5HG0424430.1586	HvPUT1	TFmatrixID_1250	187	-	tgtctgGATAAgaga	Myb/SANT; MYB-related	AT5G56840
HORVU.MOREX.r3.5HG0424430.1587	HvPUT1	TFmatrixID_1251	187	+	tgtctgGATAAgaga	Myb/SANT; MYB	AT1G49010
HORVU.MOREX.r3.5HG0424430.1588	HvPUT1	TFmatrixID_1252	189	-	tctgGATAAga	Myb/SANT	AT5G08520
HORVU.MOREX.r3.5HG0424430.1589	HvPUT1	TFmatrixID_1253	187	+	tgtctGGATAagaga	Myb/SANT; MYB-related	AT5G61620
HORVU.MOREX.r3.5HG0424430.1590	HvPUT1	TFmatrixID_1257	187	+	tgtctgGATAAga	Myb/SANT	AT5G08520
HORVU.MOREX.r3.5HG0424430.1591	HvPUT1	TFmatrixID_1260	1106	+	atgaTTATCtttttg	Myb/SANT; MYB	AT5G05790
HORVU.MOREX.r3.5HG0424430.1592	HvPUT1	TFmatrixID_1262	769	+	aaaccgaAAACCgaaaaacca	Myb/SANT	AT3G46590
HORVU.MOREX.r3.5HG0424430.1593	HvPUT1	TFmatrixID_1263	1106	+	atgaTTATCttttt	Myb/SANT; MYB	AT3G11280
HORVU.MOREX.r3.5HG0424430.1594	HvPUT1	TFmatrixID_1265	188	-	gtctGGATAagaga	Myb/SANT	AT1G74840
HORVU.MOREX.r3.5HG0424430.1595	HvPUT1	TFmatrixID_1266	188	+	gtctgGATAAgaga	Myb/SANT	AT5G47390
HORVU.MOREX.r3.5HG0424430.1596	HvPUT1	TFmatrixID_1267	189	+	tctgGATAAgagagt	Myb/SANT; MYB-related	AT5G58900
HORVU.MOREX.r3.5HG0424430.1597	HvPUT1	TFmatrixID_1268	769	+	aaaccgaAAACCgaaaaacc	Myb/SANT	AT3G46590
HORVU.MOREX.r3.5HG0424430.1598	HvPUT1	TFmatrixID_1269	187	-	tgtctgGATAAgagagta	Myb/SANT; MYB	AT3G11280
HORVU.MOREX.r3.5HG0424430.1599	HvPUT1	TFmatrixID_1273	534	+	cCTAAAtgctaaaacataaat	(Others)	AT4G12670
HORVU.MOREX.r3.5HG0424430.1600	HvPUT1	TFmatrixID_1274	187	+	tgtctgGATAAgaga	Myb/SANT; MYB-related	AT3G10580
HORVU.MOREX.r3.5HG0424430.1601	HvPUT1	TFmatrixID_1274	1106	-	atgaTTATCtttttg	Myb/SANT; MYB-related	AT3G10580
HORVU.MOREX.r3.5HG0424430.1602	HvPUT1	TFmatrixID_1275	184	+	gattgtctgGATAAgagagta	Myb/SANT; MYB	AT2G38090
HORVU.MOREX.r3.5HG0424430.1603	HvPUT1	TFmatrixID_1275	1103	-	cttatgaTTATCtttttgcat	Myb/SANT; MYB	AT2G38090
HORVU.MOREX.r3.5HG0424430.1604	HvPUT1	TFmatrixID_1308	54	-	agataCACGTtacct	NAC; NAM	AT3G04070
HORVU.MOREX.r3.5HG0424430.1605	HvPUT1	TFmatrixID_1321	214	-	tgctacgggatcAAGAAaa	NAC	AT2G27300
HORVU.MOREX.r3.5HG0424430.1606	HvPUT1	TFmatrixID_1331	304	-	gtttgCTTTTtcttttctatg	NAC	AT4G01540
HORVU.MOREX.r3.5HG0424430.1607	HvPUT1	TFmatrixID_1331	1025	-	atgtgCTTTTtctacttaatt	NAC	AT4G01540
HORVU.MOREX.r3.5HG0424430.1608	HvPUT1	TFmatrixID_1356	59	+	CACGT	NAC; NAM	AT3G04070
HORVU.MOREX.r3.5HG0424430.1609	HvPUT1	TFmatrixID_1369	650	+	TTGAAa	(Others)	AT1G63040
HORVU.MOREX.r3.5HG0424430.1610	HvPUT1	TFmatrixID_1369	1264	-	tTTCAA	(Others)	AT1G63040
HORVU.MOREX.r3.5HG0424430.1611	HvPUT1	TFmatrixID_1371	300	-	aagggtttgCTTTTt	(Others)	AT3G21890
HORVU.MOREX.r3.5HG0424430.1612	HvPUT1	TFmatrixID_1371	306	-	ttgctttttCTTTTc	(Others)	AT3G21890
HORVU.MOREX.r3.5HG0424430.1613	HvPUT1	TFmatrixID_1371	1105	-	tatgattatCTTTTt	(Others)	AT3G21890
HORVU.MOREX.r3.5HG0424430.1614	HvPUT1	TFmatrixID_1376	724	-	tCAACAcatttccgcaggaac	AP2; B3; RAV	AT1G13260
HORVU.MOREX.r3.5HG0424430.1615	HvPUT1	TFmatrixID_1382	1351	-	acttAAAAGacaata	Nin-like	AT4G24020
HORVU.MOREX.r3.5HG0424430.1616	HvPUT1	TFmatrixID_1384	565	-	cttCGTACcg	SBP	AT3G15270
HORVU.MOREX.r3.5HG0424430.1617	HvPUT1	TFmatrixID_1384	1428	+	ctGTACGggc	SBP	AT3G15270
HORVU.MOREX.r3.5HG0424430.1618	HvPUT1	TFmatrixID_1385	1427	+	gctGTACGggc	SBP	AT2G42200
HORVU.MOREX.r3.5HG0424430.1619	HvPUT1	TFmatrixID_1386	566	-	ttCGTACcgct	SBP	AT2G42200
HORVU.MOREX.r3.5HG0424430.1620	HvPUT1	TFmatrixID_1386	1426	+	tgctGTACGgg	SBP	AT2G42200
HORVU.MOREX.r3.5HG0424430.1621	HvPUT1	TFmatrixID_1387	1427	-	gctGTACGggctgca	SBP	AT3G57920
HORVU.MOREX.r3.5HG0424430.1622	HvPUT1	TFmatrixID_1388	565	+	cttCGTACcg	SBP	AT2G47070
HORVU.MOREX.r3.5HG0424430.1623	HvPUT1	TFmatrixID_1388	1428	-	ctGTACGggc	SBP	AT2G47070
HORVU.MOREX.r3.5HG0424430.1624	HvPUT1	TFmatrixID_1389	1426	+	tgctGTACGggc	SBP	AT3G15270
HORVU.MOREX.r3.5HG0424430.1625	HvPUT1	TFmatrixID_1390	566	-	ttCGTACcgct	SBP	AT2G47070
HORVU.MOREX.r3.5HG0424430.1626	HvPUT1	TFmatrixID_1390	1426	+	tgctGTACGgg	SBP	AT2G47070
HORVU.MOREX.r3.5HG0424430.1627	HvPUT1	TFmatrixID_1391	566	+	ttCGTACcgct	SBP	AT1G20980
HORVU.MOREX.r3.5HG0424430.1628	HvPUT1	TFmatrixID_1391	1426	-	tgctGTACGgg	SBP	AT1G20980
HORVU.MOREX.r3.5HG0424430.1629	HvPUT1	TFmatrixID_1392	565	-	cttCGTACcgc	SBP	AT5G50670
HORVU.MOREX.r3.5HG0424430.1630	HvPUT1	TFmatrixID_1392	1427	+	gctGTACGggc	SBP	AT5G50670
HORVU.MOREX.r3.5HG0424430.1631	HvPUT1	TFmatrixID_1393	1426	+	tgctGTACGggct	SBP	AT2G33810
HORVU.MOREX.r3.5HG0424430.1632	HvPUT1	TFmatrixID_1395	1425	+	ttgctGTACGggct	SBP	AT3G57920
HORVU.MOREX.r3.5HG0424430.1633	HvPUT1	TFmatrixID_1396	1429	-	tgTACGGg	SBP	AT2G33810
HORVU.MOREX.r3.5HG0424430.1634	HvPUT1	TFmatrixID_1399	26	-	cgtGGTCCgata	TCP	AT1G30210
HORVU.MOREX.r3.5HG0424430.1635	HvPUT1	TFmatrixID_1400	579	-	cactgggcCCCACg	TCP	AT5G08330
HORVU.MOREX.r3.5HG0424430.1636	HvPUT1	TFmatrixID_1401	581	-	ctgggcCCCACga	TCP	AT1G72010
HORVU.MOREX.r3.5HG0424430.1637	HvPUT1	TFmatrixID_1402	581	-	ctgggcCCCACga	TCP	AT1G72010
HORVU.MOREX.r3.5HG0424430.1638	HvPUT1	TFmatrixID_1403	26	-	cgtGGTCCgata	TCP	AT1G53230
HORVU.MOREX.r3.5HG0424430.1639	HvPUT1	TFmatrixID_1404	25	-	gcgtGGTCCgata	TCP	AT1G53230
HORVU.MOREX.r3.5HG0424430.1640	HvPUT1	TFmatrixID_1407	581	-	ctgggcCCCAC	TCP	AT5G23280
HORVU.MOREX.r3.5HG0424430.1641	HvPUT1	TFmatrixID_1408	581	-	ctgggcCCCACga	TCP	AT1G69690
HORVU.MOREX.r3.5HG0424430.1642	HvPUT1	TFmatrixID_1409	581	-	ctgggcCCCACga	TCP	AT1G69690
HORVU.MOREX.r3.5HG0424430.1643	HvPUT1	TFmatrixID_1410	581	-	ctgggcCCCACg	TCP	AT5G08330
HORVU.MOREX.r3.5HG0424430.1644	HvPUT1	TFmatrixID_1411	581	-	ctgggcCCCAC	TCP	AT2G45680
HORVU.MOREX.r3.5HG0424430.1645	HvPUT1	TFmatrixID_1412	581	+	ctgggcCCCACg	TCP	AT3G27010
HORVU.MOREX.r3.5HG0424430.1646	HvPUT1	TFmatrixID_1413	25	+	gcgtGGTCCgata	TCP	AT3G02150
HORVU.MOREX.r3.5HG0424430.1647	HvPUT1	TFmatrixID_1414	572	+	ccgctgacactgggcCCCACg	TCP	AT2G45680
HORVU.MOREX.r3.5HG0424430.1648	HvPUT1	TFmatrixID_1416	581	-	ctgggcCCCACgagtcacga	TCP	AT3G47620
HORVU.MOREX.r3.5HG0424430.1649	HvPUT1	TFmatrixID_1417	563	-	cgcttcgtaccgctgacactgggcCCCACg	TCP	AT1G67260
HORVU.MOREX.r3.5HG0424430.1650	HvPUT1	TFmatrixID_1422	524	-	gtTTTACtgt	Trihelix	AT1G33240
HORVU.MOREX.r3.5HG0424430.1651	HvPUT1	TFmatrixID_1422	706	-	caTTTACctt	Trihelix	AT1G33240
HORVU.MOREX.r3.5HG0424430.1652	HvPUT1	TFmatrixID_1423	524	-	gtTTTACtgtcctaa	MADF	AT5G47660
HORVU.MOREX.r3.5HG0424430.1653	HvPUT1	TFmatrixID_1424	524	-	gtTTTACtgt	Trihelix	AT1G33240
HORVU.MOREX.r3.5HG0424430.1654	HvPUT1	TFmatrixID_1426	523	+	agtTTTACtgtcct	Trihelix	AT1G76890
HORVU.MOREX.r3.5HG0424430.1655	HvPUT1	TFmatrixID_1427	399	+	gtagctGCCCTtta	Trihelix	AT2G33550
HORVU.MOREX.r3.5HG0424430.1656	HvPUT1	TFmatrixID_1429	523	-	agtTTTACtgt	Trihelix	AT1G76890
HORVU.MOREX.r3.5HG0424430.1657	HvPUT1	TFmatrixID_1431	1038	+	acttaattatGGTTActagt	MADF; Trihelix	AT3G25990
HORVU.MOREX.r3.5HG0424430.1658	HvPUT1	TFmatrixID_1437	1037	-	tacttaattatGGTTActa	MADF; Trihelix	AT1G13450
HORVU.MOREX.r3.5HG0424430.1659	HvPUT1	TFmatrixID_1438	518	-	ggctcagtTTTACtgt	MADF; Trihelix	AT1G76880
HORVU.MOREX.r3.5HG0424430.1660	HvPUT1	TFmatrixID_1439	764	+	ctataAAACCgaaa	Trihelix	AT1G76870
HORVU.MOREX.r3.5HG0424430.1661	HvPUT1	TFmatrixID_1439	771	+	accgaAAACCgaaa	Trihelix	AT1G76870
HORVU.MOREX.r3.5HG0424430.1662	HvPUT1	TFmatrixID_1439	887	-	gttcGGTTTttggt	Trihelix	AT1G76870
HORVU.MOREX.r3.5HG0424430.1663	HvPUT1	TFmatrixID_1439	1183	-	ttttGGTTTttcgg	Trihelix	AT1G76870
HORVU.MOREX.r3.5HG0424430.1664	HvPUT1	TFmatrixID_1439	1237	-	gttcGGTTTttaaa	Trihelix	AT1G76870
HORVU.MOREX.r3.5HG0424430.1665	HvPUT1	TFmatrixID_1441	519	+	gctcagtTTTACtgt	MADF	AT5G47660
HORVU.MOREX.r3.5HG0424430.1666	HvPUT1	TFmatrixID_1504	1030	-	ctttttctactTAATTatggtt	ZF-HD	AT5G39760
HORVU.MOREX.r3.5HG0424430.1667	HvPUT1	TFmatrixID_1505	1037	+	tactTAATTatggtt	ZF-HD	AT5G65410
HORVU.MOREX.r3.5HG0424430.1668	HvPUT1	TFmatrixID_1506	1038	-	actTAATTatg	ZF-HD	AT5G65410
HORVU.MOREX.r3.5HG0424430.1669	HvPUT1	TFmatrixID_1507	1039	-	cTTAATtatggttac	ZF-HD	AT3G28920
HORVU.MOREX.r3.5HG0424430.1670	HvPUT1	TFmatrixID_1507	1219	+	tatattatgATTAAt	ZF-HD	AT3G28920
HORVU.MOREX.r3.5HG0424430.1671	HvPUT1	TFmatrixID_1508	1038	-	actTAATTatg	ZF-HD	AT5G39760
HORVU.MOREX.r3.5HG0424430.1672	HvPUT1	TFmatrixID_1510	1039	-	cTTAATtatgg	ZF-HD	AT1G75240
HORVU.MOREX.r3.5HG0424430.1673	HvPUT1	TFmatrixID_1510	1223	+	ttatgATTAAt	ZF-HD	AT1G75240
HORVU.MOREX.r3.5HG0424430.1674	HvPUT1	TFmatrixID_1510	1321	-	aTTAATcatat	ZF-HD	AT1G75240
HORVU.MOREX.r3.5HG0424430.1675	HvPUT1	TFmatrixID_1511	1037	-	tactTAATTatggtt	ZF-HD	AT2G18350
HORVU.MOREX.r3.5HG0424430.1676	HvPUT1	TFmatrixID_1512	1039	-	cTTAATtatggttac	ZF-HD	AT1G75240
HORVU.MOREX.r3.5HG0424430.1677	HvPUT1	TFmatrixID_1512	1219	+	tatattatgATTAAt	ZF-HD	AT1G75240
HORVU.MOREX.r3.5HG0424430.1678	HvPUT1	TFmatrixID_1513	1032	+	ttttctactTAATTa	ZF-HD	AT3G28920
HORVU.MOREX.r3.5HG0424430.1679	HvPUT1	TFmatrixID_1514	1037	-	tactTAATTatggtt	ZF-HD	AT2G18350
HORVU.MOREX.r3.5HG0424430.1680	HvPUT1	TFmatrixID_1515	191	+	tgGATAAga	Myb/SANT; MYB-related	AT4G09450
HORVU.MOREX.r3.5HG0424430.1681	HvPUT1	TFmatrixID_1517	1082	+	atGATATtaa	Myb/SANT; MYB-related	AT1G18330
HORVU.MOREX.r3.5HG0424430.1682	HvPUT1	TFmatrixID_1521	1082	-	atGATATtaa	Myb/SANT; MYB-related	AT3G09600
HORVU.MOREX.r3.5HG0424430.1683	HvPUT1	TFmatrixID_1522	1082	-	atGATATtaa	Myb/SANT; MYB-related	AT4G01280
HORVU.MOREX.r3.5HG0424430.1684	HvPUT1	TFmatrixID_1524	189	-	tctGGATAag	Myb/SANT	AT3G16350
HORVU.MOREX.r3.5HG0424430.1685	HvPUT1	TFmatrixID_1527	60	-	ACGTTacct	Dof	AT5G62940
HORVU.MOREX.r3.5HG0424430.1686	HvPUT1	TFmatrixID_1528	648	+	aTTTGAaaat	TCR; CPP	AT3G22760
HORVU.MOREX.r3.5HG0424430.1687	HvPUT1	TFmatrixID_1530	190	+	ctgGATAAga	Myb/SANT; MYB	AT3G11280
HORVU.MOREX.r3.5HG0424430.1688	HvPUT1	TFmatrixID_1531	1345	-	agCCCTAc	Myb/SANT; MYB-related	AT5G67580
HORVU.MOREX.r3.5HG0424430.1689	HvPUT1	TFmatrixID_1538	366	+	aaTGCACcac	(Others)	AT2G42040
HORVU.MOREX.r3.5HG0424430.1690	HvPUT1	TFmatrixID_1538	966	-	taaGTGCAac	(Others)	AT2G42040
HORVU.MOREX.r3.5HG0424430.1691	HvPUT1	TFmatrixID_1540	56	-	ataCACGTta	bZIP	AT3G56850
HORVU.MOREX.r3.5HG0424430.1692	HvPUT1	TFmatrixID_1541	56	-	ataCACGTta	bZIP	AT3G19290
HORVU.MOREX.r3.5HG0424430.1693	HvPUT1	TFmatrixID_1544	228	+	gAAAAGtag	Dof	AT1G64620
HORVU.MOREX.r3.5HG0424430.1694	HvPUT1	TFmatrixID_1544	746	+	tAAAAGtag	Dof	AT1G64620
HORVU.MOREX.r3.5HG0424430.1695	HvPUT1	TFmatrixID_1553	89	+	atcCGGTCagtc	GeBP	AT4G00390
HORVU.MOREX.r3.5HG0424430.1696	HvPUT1	TFmatrixID_1555	334	+	gCCTAAtt	MYB	AT3G01530
HORVU.MOREX.r3.5HG0424430.1697	HvPUT1	TFmatrixID_1555	361	+	gCCTAAat	MYB	AT3G01530
HORVU.MOREX.r3.5HG0424430.1698	HvPUT1	TFmatrixID_1556	565	+	cttCGTACcg	SBP	AT1G27370
HORVU.MOREX.r3.5HG0424430.1699	HvPUT1	TFmatrixID_1556	1428	-	ctGTACGggc	SBP	AT1G27370
HORVU.MOREX.r3.5HG0424430.1700	HvPUT1	TFmatrixID_1559	582	+	tgggcCCCACg	TCP	AT2G45680
HORVU.MOREX.r3.5HG0424430.1701	HvPUT1	TFmatrixID_1561	57	+	tACACGttacct	NAC; NAM	AT1G52890
HORVU.MOREX.r3.5HG0424430.1702	HvPUT1	TFmatrixID_1562	57	+	tACACGttacct	NAC; NAM	AT1G52890
HORVU.MOREX.r3.5HG0424430.1703	HvPUT1	TFmatrixID_1565	372	+	ccaCACGGctcca	NAC; NAM	AT1G52890
HORVU.MOREX.r3.5HG0424430.1704	HvPUT1	TFmatrixID_1567	56	+	atACACGttacc	NAC; NAM	AT1G52890
HORVU.MOREX.r3.5HG0424430.1705	HvPUT1	TFmatrixID_1573	372	+	ccaCACGGctcca	NAC; NAM	AT3G15500
HORVU.MOREX.r3.5HG0424430.1706	HvPUT1	TFmatrixID_1578	56	+	atACACGttacc	NAC; NAM	AT3G15500
HORVU.MOREX.r3.5HG0424430.1707	HvPUT1	TFmatrixID_1589	21	-	gctgGCGTGgtc	NAC; NAM	AT5G39610
HORVU.MOREX.r3.5HG0424430.1708	HvPUT1	TFmatrixID_1595	56	+	atACACGttacct	NAC; NAM	AT5G39610
HORVU.MOREX.r3.5HG0424430.1709	HvPUT1	TFmatrixID_1603	959	-	gttttCGTAAgt	NAC; NAM	AT1G01720
HORVU.MOREX.r3.5HG0424430.1710	HvPUT1	TFmatrixID_1604	56	+	atACACGttacc	NAC; NAM	AT1G01720
HORVU.MOREX.r3.5HG0424430.1711	HvPUT1	TFmatrixID_1604	372	+	ccACACGgctcc	NAC; NAM	AT1G01720
HORVU.MOREX.r3.5HG0424430.1712	HvPUT1	TFmatrixID_1605	59	-	CACGTtacctc	NAC; NAM	AT1G01720
HORVU.MOREX.r3.5HG0424430.1713	HvPUT1	TFmatrixID_1642	50	+	agcaAGATAcacgt	Myb/SANT	AT3G46640
HORVU.MOREX.r3.5HG0424430.1714	HvPUT1	TFmatrixID_1652	50	+	agcaAGATAcacgt	Myb/SANT	AT3G46640
HORVU.MOREX.r3.5HG0424430.1715	HvPUT1	TFmatrixID_1663	959	-	gttttCGTAAgt	NAC; NAM	AT3G61910
HORVU.MOREX.r3.5HG0424430.1716	HvPUT1	TFmatrixID_1664	959	+	gttttCGTAAgt	NAC; NAM	AT3G61910
HORVU.MOREX.r3.5HG0424430.1717	HvPUT1	TFmatrixID_1666	959	+	gttttCGTAAgt	NAC; NAM	AT3G61910
HORVU.MOREX.r3.5HG0424430.1718	HvPUT1	TFmatrixID_1667	959	+	gttttCGTAAgt	NAC; NAM	AT3G61910
HORVU.MOREX.r3.5HG0424430.1719	HvPUT1	TFmatrixID_1677	21	-	gctgGCGTGgtc	NAC; NAM	AT3G49530
HORVU.MOREX.r3.5HG0424430.1720	HvPUT1	TFmatrixID_1696	959	+	gttttCGTAAgt	NAC; NAM	AT1G32770
HORVU.MOREX.r3.5HG0424430.1721	HvPUT1	TFmatrixID_1704	57	-	tACACGttacct	NAC; NAM	AT5G66300
HORVU.MOREX.r3.5HG0424430.1722	HvPUT1	TFmatrixID_1706	372	+	ccaCACGGctcc	NAC; NAM	AT5G66300
HORVU.MOREX.r3.5HG0424430.1723	HvPUT1	TFmatrixID_1708	56	+	atACACGttacc	NAC; NAM	AT5G66300
HORVU.MOREX.r3.5HG0424430.1724	HvPUT1	TFmatrixID_1709	959	-	gttttCGTAAgt	NAC; NAM	AT5G66300
HORVU.MOREX.r3.5HG0424430.1725	HvPUT1	TFmatrixID_1712	958	+	tgttttCGTAAgt	NAC; NAM	AT5G66300
HORVU.MOREX.r3.5HG0424430.1726	HvPUT1	TFmatrixID_1713	57	+	tACACGttacct	NAC; NAM	AT1G71930
HORVU.MOREX.r3.5HG0424430.1727	HvPUT1	TFmatrixID_1715	56	+	atACACGttacc	NAC; NAM	AT1G71930
HORVU.MOREX.r3.5HG0424430.1728	HvPUT1	TFmatrixID_1715	372	+	ccACACGgctcc	NAC; NAM	AT1G71930
HORVU.MOREX.r3.5HG0424430.1729	HvPUT1	TFmatrixID_1716	372	+	ccaCACGGctcca	NAC; NAM	AT1G71930
HORVU.MOREX.r3.5HG0424430.1730	HvPUT1	TFmatrixID_1717	372	+	ccaCACGGctcca	NAC; NAM	AT1G71930
HORVU.MOREX.r3.5HG0424430.1731	HvPUT1	TFmatrixID_1718	56	+	atACACGttacc	NAC; NAM	AT1G71930
HORVU.MOREX.r3.5HG0424430.1732	HvPUT1	TFmatrixID_1719	56	+	atACACGttacc	NAC; NAM	AT1G71930
HORVU.MOREX.r3.5HG0424430.1733	HvPUT1	TFmatrixID_1734	1058	-	ctgcTTGACcgaa	WRKY	AT2G04880
HORVU.MOREX.r3.5HG0424430.1734	HvPUT1	TFmatrixID_1739	1058	+	ctgcTTGACcgaa	WRKY	AT2G04880
HORVU.MOREX.r3.5HG0424430.1735	HvPUT1	TFmatrixID_1741	1058	+	ctgcTTGACcga	WRKY	AT2G04880
HORVU.MOREX.r3.5HG0424430.1736	HvPUT1	TFmatrixID_1742	1059	-	tgcTTGACcgaat	WRKY	AT2G04880
HORVU.MOREX.r3.5HG0424430.1737	HvPUT1	TFmatrixID_1746	1115	-	ttttTGCATa	TBP	AT1G55520;AT3G13445;BRADI1G13220;BRADI3G27190;BRADI4G01150;Glyma03g04500.1;Glyma09g41330.1;Glyma16g25450.1;Glyma18g44460.1;Glyma19g28780.1;Os10g0432300;Os12g0580300;POPTR_0013s05580;POPTR_0019s04890;Sb01g012880;Sb01g017130;Sb01g021297;Sb08g022273;GRMZM2G149238;GRMZM2G161418
HORVU.MOREX.r3.5HG0424430.1738	HvPUT1	TF_motif_seq_0009	468	-	acgatGACCT	(Motif sequence only)
HORVU.MOREX.r3.5HG0424430.1739	HvPUT1	TF_motif_seq_0009	675	+	ACATCctaaa	(Motif sequence only)
HORVU.MOREX.r3.5HG0424430.1740	HvPUT1	TF_motif_seq_0009	687	+	ACTTCatgta	(Motif sequence only)
HORVU.MOREX.r3.5HG0424430.1741	HvPUT1	TF_motif_seq_0009	985	+	ACATCacaca	(Motif sequence only)
HORVU.MOREX.r3.5HG0424430.1742	HvPUT1	TF_motif_seq_0011	1420	-	gtcccTTGCT	(Motif sequence only)
HORVU.MOREX.r3.5HG0424430.1743	HvPUT1	TF_motif_seq_0018	21	-	gctggCGTGG	(Motif sequence only)
HORVU.MOREX.r3.5HG0424430.1744	HvPUT1	TF_motif_seq_0025	764	+	CTATAaaacc	(Motif sequence only)
HORVU.MOREX.r3.5HG0424430.1745	HvPUT1	TF_motif_seq_0026	956	+	CTTGTtttcg	(Motif sequence only)
HORVU.MOREX.r3.5HG0424430.1746	HvPUT1	TF_motif_seq_0026	1165	-	tattgACAAG	(Motif sequence only)
HORVU.MOREX.r3.5HG0424430.1747	HvPUT1	TF_motif_seq_0027	1039	+	CTTAAttatg	(Motif sequence only)
HORVU.MOREX.r3.5HG0424430.1748	HvPUT1	TF_motif_seq_0027	1039	-	cttaaTTATG	(Motif sequence only)
HORVU.MOREX.r3.5HG0424430.1749	HvPUT1	TF_motif_seq_0031	79	+	GCAACcacac	(Motif sequence only)
HORVU.MOREX.r3.5HG0424430.1750	HvPUT1	TF_motif_seq_0052	228	-	gaaaaGTAGA	(Motif sequence only)
HORVU.MOREX.r3.5HG0424430.1751	HvPUT1	TF_motif_seq_0052	1035	+	TCTACttaat	(Motif sequence only)
HORVU.MOREX.r3.5HG0424430.1752	HvPUT1	TF_motif_seq_0064	712	+	CCTTTtattta	(Motif sequence only)
HORVU.MOREX.r3.5HG0424430.1753	HvPUT1	TF_motif_seq_0064	1383	+	CCTTTtctcca	(Motif sequence only)
HORVU.MOREX.r3.5HG0424430.1754	HvPUT1	TF_motif_seq_0065	441	-	gtaaatGGACG	(Motif sequence only)
HORVU.MOREX.r3.5HG0424430.1755	HvPUT1	TF_motif_seq_0068	216	+	CTACGggatca	(Motif sequence only)
HORVU.MOREX.r3.5HG0424430.1756	HvPUT1	TF_motif_seq_0077	562	-	ccgcttCGTAC	(Motif sequence only)
HORVU.MOREX.r3.5HG0424430.1757	HvPUT1	TF_motif_seq_0077	1430	+	GTACGggctgc	(Motif sequence only)
HORVU.MOREX.r3.5HG0424430.1758	HvPUT1	TF_motif_seq_0083	717	+	TATTTattcaa	(Motif sequence only)
HORVU.MOREX.r3.5HG0424430.1759	HvPUT1	TF_motif_seq_0103	579	+	CACTGggcccca	(Motif sequence only)
HORVU.MOREX.r3.5HG0424430.1760	HvPUT1	TF_motif_seq_0115	576	+	TGACActgggcc	(Motif sequence only)
HORVU.MOREX.r3.5HG0424430.1761	HvPUT1	TF_motif_seq_0124	49	+	AAGCAagatacacg	(Motif sequence only)
HORVU.MOREX.r3.5HG0424430.1762	HvPUT1	TF_motif_seq_0168	641	+	TTTCCgtatttgaaaa	(Motif sequence only)
HORVU.MOREX.r3.5HG0424430.1763	HvPUT1	TF_motif_seq_0182	1283	+	gaaaCCAAAattacatag	(Motif sequence only)
HORVU.MOREX.r3.5HG0424430.1764	HvPUT1	TF_motif_seq_0183	640	-	tTTTCCgtatttgaaaat	(Motif sequence only)
HORVU.MOREX.r3.5HG0424430.1765	HvPUT1	TF_motif_seq_0188	26	-	CGTGGtccgatagatgagc	(Motif sequence only)
HORVU.MOREX.r3.5HG0424430.1766	HvPUT1	TF_motif_seq_0188	574	+	gctgacactgggccCCACG	(Motif sequence only)
HORVU.MOREX.r3.5HG0424430.1767	HvPUT1	TF_motif_seq_0198	649	-	tttgaaaatatttggCATCA	(Motif sequence only)
HORVU.MOREX.r3.5HG0424430.1768	HvPUT1	TF_motif_seq_0200	1185	+	TTGGTttttcggttaaccga	(Motif sequence only)
HORVU.MOREX.r3.5HG0424430.1769	HvPUT1	TF_motif_seq_0200	1271	-	ttctatttcttcgaaACCAA	(Motif sequence only)
HORVU.MOREX.r3.5HG0424430.1770	HvPUT1	TF_motif_seq_0230	330	-	atcggcctaattgggctttctgcggTATGG	(Motif sequence only)
HORVU.MOREX.r3.5HG0424430.1771	HvPUT1	TF_motif_seq_0238	230	+	AAAGT	(Motif sequence only)
HORVU.MOREX.r3.5HG0424430.1772	HvPUT1	TF_motif_seq_0238	308	-	GCTTT	(Motif sequence only)
HORVU.MOREX.r3.5HG0424430.1773	HvPUT1	TF_motif_seq_0238	314	-	TCTTT	(Motif sequence only)
HORVU.MOREX.r3.5HG0424430.1774	HvPUT1	TF_motif_seq_0238	344	-	GCTTT	(Motif sequence only)
HORVU.MOREX.r3.5HG0424430.1775	HvPUT1	TF_motif_seq_0238	407	-	CCTTT	(Motif sequence only)
HORVU.MOREX.r3.5HG0424430.1776	HvPUT1	TF_motif_seq_0238	628	+	AAAGA	(Motif sequence only)
HORVU.MOREX.r3.5HG0424430.1777	HvPUT1	TF_motif_seq_0238	712	-	CCTTT	(Motif sequence only)
HORVU.MOREX.r3.5HG0424430.1778	HvPUT1	TF_motif_seq_0238	748	+	AAAGT	(Motif sequence only)
HORVU.MOREX.r3.5HG0424430.1779	HvPUT1	TF_motif_seq_0238	1029	-	GCTTT	(Motif sequence only)
HORVU.MOREX.r3.5HG0424430.1780	HvPUT1	TF_motif_seq_0238	1113	-	TCTTT	(Motif sequence only)
HORVU.MOREX.r3.5HG0424430.1781	HvPUT1	TF_motif_seq_0238	1356	+	AAAGA	(Motif sequence only)
HORVU.MOREX.r3.5HG0424430.1782	HvPUT1	TF_motif_seq_0238	1383	-	CCTTT	(Motif sequence only)
HORVU.MOREX.r3.5HG0424430.1783	HvPUT1	TF_motif_seq_0238	1396	+	AAAGG	(Motif sequence only)
HORVU.MOREX.r3.5HG0424430.1784	HvPUT1	TF_motif_seq_0248	32	-	CCGAT	(Motif sequence only)
HORVU.MOREX.r3.5HG0424430.1785	HvPUT1	TF_motif_seq_0248	60	-	ACGTT	(Motif sequence only)
HORVU.MOREX.r3.5HG0424430.1786	HvPUT1	TF_motif_seq_0248	72	-	CCGTC	(Motif sequence only)
HORVU.MOREX.r3.5HG0424430.1787	HvPUT1	TF_motif_seq_0248	91	-	CCGGT	(Motif sequence only)
HORVU.MOREX.r3.5HG0424430.1788	HvPUT1	TF_motif_seq_0248	136	-	CCGTC	(Motif sequence only)
HORVU.MOREX.r3.5HG0424430.1789	HvPUT1	TF_motif_seq_0248	144	+	AACGA	(Motif sequence only)
HORVU.MOREX.r3.5HG0424430.1790	HvPUT1	TF_motif_seq_0248	217	+	TACGG	(Motif sequence only)
HORVU.MOREX.r3.5HG0424430.1791	HvPUT1	TF_motif_seq_0248	240	+	AGCGG	(Motif sequence only)
HORVU.MOREX.r3.5HG0424430.1792	HvPUT1	TF_motif_seq_0248	247	+	GACGG	(Motif sequence only)
HORVU.MOREX.r3.5HG0424430.1793	HvPUT1	TF_motif_seq_0248	300	+	AAGGG	(Motif sequence only)
HORVU.MOREX.r3.5HG0424430.1794	HvPUT1	TF_motif_seq_0248	330	+	ATCGG	(Motif sequence only)
HORVU.MOREX.r3.5HG0424430.1795	HvPUT1	TF_motif_seq_0248	375	+	CACGG	(Motif sequence only)
HORVU.MOREX.r3.5HG0424430.1796	HvPUT1	TF_motif_seq_0248	406	-	CCCTT	(Motif sequence only)
HORVU.MOREX.r3.5HG0424430.1797	HvPUT1	TF_motif_seq_0248	407	-	CCTTT	(Motif sequence only)
HORVU.MOREX.r3.5HG0424430.1798	HvPUT1	TF_motif_seq_0248	433	+	AACTG	(Motif sequence only)
HORVU.MOREX.r3.5HG0424430.1799	HvPUT1	TF_motif_seq_0248	444	+	AATGG	(Motif sequence only)
HORVU.MOREX.r3.5HG0424430.1800	HvPUT1	TF_motif_seq_0248	448	+	GACGG	(Motif sequence only)
HORVU.MOREX.r3.5HG0424430.1801	HvPUT1	TF_motif_seq_0248	458	+	AACGA	(Motif sequence only)
HORVU.MOREX.r3.5HG0424430.1802	HvPUT1	TF_motif_seq_0248	467	+	AACGA	(Motif sequence only)
HORVU.MOREX.r3.5HG0424430.1803	HvPUT1	TF_motif_seq_0248	481	+	AACTG	(Motif sequence only)
HORVU.MOREX.r3.5HG0424430.1804	HvPUT1	TF_motif_seq_0248	494	+	AATGG	(Motif sequence only)
HORVU.MOREX.r3.5HG0424430.1805	HvPUT1	TF_motif_seq_0248	522	-	CAGTT	(Motif sequence only)
HORVU.MOREX.r3.5HG0424430.1806	HvPUT1	TF_motif_seq_0248	552	+	AATGG	(Motif sequence only)
HORVU.MOREX.r3.5HG0424430.1807	HvPUT1	TF_motif_seq_0248	562	-	CCGCT	(Motif sequence only)
HORVU.MOREX.r3.5HG0424430.1808	HvPUT1	TF_motif_seq_0248	572	-	CCGCT	(Motif sequence only)
HORVU.MOREX.r3.5HG0424430.1809	HvPUT1	TF_motif_seq_0248	604	+	AACGA	(Motif sequence only)
HORVU.MOREX.r3.5HG0424430.1810	HvPUT1	TF_motif_seq_0248	644	-	CCGTA	(Motif sequence only)
HORVU.MOREX.r3.5HG0424430.1811	HvPUT1	TF_motif_seq_0248	712	-	CCTTT	(Motif sequence only)
HORVU.MOREX.r3.5HG0424430.1812	HvPUT1	TF_motif_seq_0248	770	+	AACCG	(Motif sequence only)
HORVU.MOREX.r3.5HG0424430.1813	HvPUT1	TF_motif_seq_0248	777	+	AACCG	(Motif sequence only)
HORVU.MOREX.r3.5HG0424430.1814	HvPUT1	TF_motif_seq_0248	790	+	AACCG	(Motif sequence only)
HORVU.MOREX.r3.5HG0424430.1815	HvPUT1	TF_motif_seq_0248	795	+	AACCG	(Motif sequence only)
HORVU.MOREX.r3.5HG0424430.1816	HvPUT1	TF_motif_seq_0248	800	+	AACTG	(Motif sequence only)
HORVU.MOREX.r3.5HG0424430.1817	HvPUT1	TF_motif_seq_0248	809	+	AACCG	(Motif sequence only)
HORVU.MOREX.r3.5HG0424430.1818	HvPUT1	TF_motif_seq_0248	811	-	CCGAT	(Motif sequence only)
HORVU.MOREX.r3.5HG0424430.1819	HvPUT1	TF_motif_seq_0248	848	-	CCGGT	(Motif sequence only)
HORVU.MOREX.r3.5HG0424430.1820	HvPUT1	TF_motif_seq_0248	890	-	CGGTT	(Motif sequence only)
HORVU.MOREX.r3.5HG0424430.1821	HvPUT1	TF_motif_seq_0248	908	+	AACTG	(Motif sequence only)
HORVU.MOREX.r3.5HG0424430.1822	HvPUT1	TF_motif_seq_0248	973	+	AACAG	(Motif sequence only)
HORVU.MOREX.r3.5HG0424430.1823	HvPUT1	TF_motif_seq_0248	1194	-	CGGTT	(Motif sequence only)
HORVU.MOREX.r3.5HG0424430.1824	HvPUT1	TF_motif_seq_0248	1199	+	AACCG	(Motif sequence only)
HORVU.MOREX.r3.5HG0424430.1825	HvPUT1	TF_motif_seq_0248	1208	+	AACCG	(Motif sequence only)
HORVU.MOREX.r3.5HG0424430.1826	HvPUT1	TF_motif_seq_0248	1213	+	AACTG	(Motif sequence only)
HORVU.MOREX.r3.5HG0424430.1827	HvPUT1	TF_motif_seq_0248	1240	-	CGGTT	(Motif sequence only)
HORVU.MOREX.r3.5HG0424430.1828	HvPUT1	TF_motif_seq_0248	1301	+	AACTG	(Motif sequence only)
HORVU.MOREX.r3.5HG0424430.1829	HvPUT1	TF_motif_seq_0248	1310	+	AACCG	(Motif sequence only)
HORVU.MOREX.r3.5HG0424430.1830	HvPUT1	TF_motif_seq_0248	1315	+	AACCG	(Motif sequence only)
HORVU.MOREX.r3.5HG0424430.1831	HvPUT1	TF_motif_seq_0248	1317	-	CCGTA	(Motif sequence only)
HORVU.MOREX.r3.5HG0424430.1832	HvPUT1	TF_motif_seq_0248	1333	+	AACCG	(Motif sequence only)
HORVU.MOREX.r3.5HG0424430.1833	HvPUT1	TF_motif_seq_0248	1338	+	AACGC	(Motif sequence only)
HORVU.MOREX.r3.5HG0424430.1834	HvPUT1	TF_motif_seq_0248	1383	-	CCTTT	(Motif sequence only)
HORVU.MOREX.r3.5HG0424430.1835	HvPUT1	TF_motif_seq_0248	1396	+	AAAGG	(Motif sequence only)
HORVU.MOREX.r3.5HG0424430.1836	HvPUT1	TF_motif_seq_0248	1415	-	CAGTT	(Motif sequence only)
HORVU.MOREX.r3.5HG0424430.1837	HvPUT1	TF_motif_seq_0248	1422	-	CCCTT	(Motif sequence only)
HORVU.MOREX.r3.5HG0424430.1838	HvPUT1	TF_motif_seq_0248	1431	+	TACGG	(Motif sequence only)
HORVU.MOREX.r3.5HG0424430.1839	HvPUT1	TF_motif_seq_0248	1445	-	CCATT	(Motif sequence only)
HORVU.MOREX.r3.5HG0424430.1840	HvPUT1	TF_motif_seq_0248	1480	+	GACGG	(Motif sequence only)
HORVU.MOREX.r3.5HG0424430.1841	HvPUT1	TF_motif_seq_0249	25	+	GCGTG	(Motif sequence only)
HORVU.MOREX.r3.5HG0424430.1842	HvPUT1	TF_motif_seq_0249	59	-	CACGT	(Motif sequence only)
HORVU.MOREX.r3.5HG0424430.1843	HvPUT1	TF_motif_seq_0249	60	+	ACGTT	(Motif sequence only)
HORVU.MOREX.r3.5HG0424430.1844	HvPUT1	TF_motif_seq_0249	86	-	CACAT	(Motif sequence only)
HORVU.MOREX.r3.5HG0424430.1845	HvPUT1	TF_motif_seq_0249	118	-	CACAT	(Motif sequence only)
HORVU.MOREX.r3.5HG0424430.1846	HvPUT1	TF_motif_seq_0249	131	-	CACGC	(Motif sequence only)
HORVU.MOREX.r3.5HG0424430.1847	HvPUT1	TF_motif_seq_0249	135	-	CCCGT	(Motif sequence only)
HORVU.MOREX.r3.5HG0424430.1848	HvPUT1	TF_motif_seq_0249	164	+	ATGTG	(Motif sequence only)
HORVU.MOREX.r3.5HG0424430.1849	HvPUT1	TF_motif_seq_0249	218	+	ACGGG	(Motif sequence only)
HORVU.MOREX.r3.5HG0424430.1850	HvPUT1	TF_motif_seq_0249	248	+	ACGGG	(Motif sequence only)
HORVU.MOREX.r3.5HG0424430.1851	HvPUT1	TF_motif_seq_0249	259	-	CACAT	(Motif sequence only)
HORVU.MOREX.r3.5HG0424430.1852	HvPUT1	TF_motif_seq_0249	270	-	CACCT	(Motif sequence only)
HORVU.MOREX.r3.5HG0424430.1853	HvPUT1	TF_motif_seq_0249	278	+	TCGTG	(Motif sequence only)
HORVU.MOREX.r3.5HG0424430.1854	HvPUT1	TF_motif_seq_0249	375	-	CACGG	(Motif sequence only)
HORVU.MOREX.r3.5HG0424430.1855	HvPUT1	TF_motif_seq_0249	429	-	CACGA	(Motif sequence only)
HORVU.MOREX.r3.5HG0424430.1856	HvPUT1	TF_motif_seq_0249	474	+	ACCTG	(Motif sequence only)
HORVU.MOREX.r3.5HG0424430.1857	HvPUT1	TF_motif_seq_0249	589	-	CACGA	(Motif sequence only)
HORVU.MOREX.r3.5HG0424430.1858	HvPUT1	TF_motif_seq_0249	590	+	ACGAG	(Motif sequence only)
HORVU.MOREX.r3.5HG0424430.1859	HvPUT1	TF_motif_seq_0249	596	-	CACGA	(Motif sequence only)
HORVU.MOREX.r3.5HG0424430.1860	HvPUT1	TF_motif_seq_0249	674	-	CACAT	(Motif sequence only)
HORVU.MOREX.r3.5HG0424430.1861	HvPUT1	TF_motif_seq_0249	691	-	CATGT	(Motif sequence only)
HORVU.MOREX.r3.5HG0424430.1862	HvPUT1	TF_motif_seq_0249	728	-	CACAT	(Motif sequence only)
HORVU.MOREX.r3.5HG0424430.1863	HvPUT1	TF_motif_seq_0249	933	+	ATGTG	(Motif sequence only)
HORVU.MOREX.r3.5HG0424430.1864	HvPUT1	TF_motif_seq_0249	946	-	CATGT	(Motif sequence only)
HORVU.MOREX.r3.5HG0424430.1865	HvPUT1	TF_motif_seq_0249	967	+	AAGTG	(Motif sequence only)
HORVU.MOREX.r3.5HG0424430.1866	HvPUT1	TF_motif_seq_0249	991	-	CACAT	(Motif sequence only)
HORVU.MOREX.r3.5HG0424430.1867	HvPUT1	TF_motif_seq_0249	1003	-	CACAT	(Motif sequence only)
HORVU.MOREX.r3.5HG0424430.1868	HvPUT1	TF_motif_seq_0249	1017	-	CACAT	(Motif sequence only)
HORVU.MOREX.r3.5HG0424430.1869	HvPUT1	TF_motif_seq_0249	1024	-	CATGT	(Motif sequence only)
HORVU.MOREX.r3.5HG0424430.1870	HvPUT1	TF_motif_seq_0249	1025	+	ATGTG	(Motif sequence only)
HORVU.MOREX.r3.5HG0424430.1871	HvPUT1	TF_motif_seq_0249	1159	-	CACTT	(Motif sequence only)
HORVU.MOREX.r3.5HG0424430.1872	HvPUT1	TF_motif_seq_0249	1171	-	CAAGT	(Motif sequence only)
HORVU.MOREX.r3.5HG0424430.1873	HvPUT1	TF_motif_seq_0249	1172	+	AAGTG	(Motif sequence only)
HORVU.MOREX.r3.5HG0424430.1874	HvPUT1	TF_motif_seq_0249	1432	+	ACGGG	(Motif sequence only)
HORVU.MOREX.r3.5HG0424430.1875	HvPUT1	TF_motif_seq_0259	17	+	CGAGG	(Motif sequence only)
HORVU.MOREX.r3.5HG0424430.1876	HvPUT1	TF_motif_seq_0259	26	-	CGTGG	(Motif sequence only)
HORVU.MOREX.r3.5HG0424430.1877	HvPUT1	TF_motif_seq_0259	70	+	CGCCG	(Motif sequence only)
HORVU.MOREX.r3.5HG0424430.1878	HvPUT1	TF_motif_seq_0259	70	-	CGCCG	(Motif sequence only)
HORVU.MOREX.r3.5HG0424430.1879	HvPUT1	TF_motif_seq_0259	73	-	CGTCT	(Motif sequence only)
HORVU.MOREX.r3.5HG0424430.1880	HvPUT1	TF_motif_seq_0259	109	-	CATCG	(Motif sequence only)
HORVU.MOREX.r3.5HG0424430.1881	HvPUT1	TF_motif_seq_0259	137	-	CGTCC	(Motif sequence only)
HORVU.MOREX.r3.5HG0424430.1882	HvPUT1	TF_motif_seq_0259	146	+	CGACT	(Motif sequence only)
HORVU.MOREX.r3.5HG0424430.1883	HvPUT1	TF_motif_seq_0259	216	+	CTACG	(Motif sequence only)
HORVU.MOREX.r3.5HG0424430.1884	HvPUT1	TF_motif_seq_0259	246	+	CGACG	(Motif sequence only)
HORVU.MOREX.r3.5HG0424430.1885	HvPUT1	TF_motif_seq_0259	246	-	CGACG	(Motif sequence only)
HORVU.MOREX.r3.5HG0424430.1886	HvPUT1	TF_motif_seq_0259	261	-	CATCG	(Motif sequence only)
HORVU.MOREX.r3.5HG0424430.1887	HvPUT1	TF_motif_seq_0259	264	+	CGACC	(Motif sequence only)
HORVU.MOREX.r3.5HG0424430.1888	HvPUT1	TF_motif_seq_0259	447	+	GGACG	(Motif sequence only)
HORVU.MOREX.r3.5HG0424430.1889	HvPUT1	TF_motif_seq_0259	460	+	CGACC	(Motif sequence only)
HORVU.MOREX.r3.5HG0424430.1890	HvPUT1	TF_motif_seq_0259	469	+	CGATG	(Motif sequence only)
HORVU.MOREX.r3.5HG0424430.1891	HvPUT1	TF_motif_seq_0259	565	-	CTTCG	(Motif sequence only)
HORVU.MOREX.r3.5HG0424430.1892	HvPUT1	TF_motif_seq_0259	588	+	CCACG	(Motif sequence only)
HORVU.MOREX.r3.5HG0424430.1893	HvPUT1	TF_motif_seq_0259	603	+	CAACG	(Motif sequence only)
HORVU.MOREX.r3.5HG0424430.1894	HvPUT1	TF_motif_seq_0259	606	+	CGACA	(Motif sequence only)
HORVU.MOREX.r3.5HG0424430.1895	HvPUT1	TF_motif_seq_0259	872	+	CGATG	(Motif sequence only)
HORVU.MOREX.r3.5HG0424430.1896	HvPUT1	TF_motif_seq_0259	998	-	CTTCG	(Motif sequence only)
HORVU.MOREX.r3.5HG0424430.1897	HvPUT1	TF_motif_seq_0259	1279	-	CTTCG	(Motif sequence only)
HORVU.MOREX.r3.5HG0424430.1898	HvPUT1	TF_motif_seq_0259	1479	+	GGACG	(Motif sequence only)
HORVU.MOREX.r3.5HG0424430.1899	HvPUT1	TF_motif_seq_0260	126	+	CTCTT	(Motif sequence only)
HORVU.MOREX.r3.5HG0424430.1900	HvPUT1	TF_motif_seq_0260	196	-	AAGAG	(Motif sequence only)
HORVU.MOREX.r3.5HG0424430.1901	HvPUT1	TF_motif_seq_0261	18	+	GAGGC	(Motif sequence only)
HORVU.MOREX.r3.5HG0424430.1902	HvPUT1	TF_motif_seq_0261	55	+	GATAC	(Motif sequence only)
HORVU.MOREX.r3.5HG0424430.1903	HvPUT1	TF_motif_seq_0261	74	-	GTCTG	(Motif sequence only)
HORVU.MOREX.r3.5HG0424430.1904	HvPUT1	TF_motif_seq_0261	138	-	GTCCC	(Motif sequence only)
HORVU.MOREX.r3.5HG0424430.1905	HvPUT1	TF_motif_seq_0261	147	-	GACTC	(Motif sequence only)
HORVU.MOREX.r3.5HG0424430.1906	HvPUT1	TF_motif_seq_0261	156	+	GAGAC	(Motif sequence only)
HORVU.MOREX.r3.5HG0424430.1907	HvPUT1	TF_motif_seq_0261	188	-	GTCTG	(Motif sequence only)
HORVU.MOREX.r3.5HG0424430.1908	HvPUT1	TF_motif_seq_0261	198	+	GAGAG	(Motif sequence only)
HORVU.MOREX.r3.5HG0424430.1909	HvPUT1	TF_motif_seq_0261	245	+	GCGAC	(Motif sequence only)
HORVU.MOREX.r3.5HG0424430.1910	HvPUT1	TF_motif_seq_0261	378	-	GGCTC	(Motif sequence only)
HORVU.MOREX.r3.5HG0424430.1911	HvPUT1	TF_motif_seq_0261	418	+	GAGGC	(Motif sequence only)
HORVU.MOREX.r3.5HG0424430.1912	HvPUT1	TF_motif_seq_0261	488	-	ATCTC	(Motif sequence only)
HORVU.MOREX.r3.5HG0424430.1913	HvPUT1	TF_motif_seq_0261	502	+	GAGAG	(Motif sequence only)
HORVU.MOREX.r3.5HG0424430.1914	HvPUT1	TF_motif_seq_0261	518	-	GGCTC	(Motif sequence only)
HORVU.MOREX.r3.5HG0424430.1915	HvPUT1	TF_motif_seq_0261	577	+	GACAC	(Motif sequence only)
HORVU.MOREX.r3.5HG0424430.1916	HvPUT1	TF_motif_seq_0261	592	+	GAGTC	(Motif sequence only)
HORVU.MOREX.r3.5HG0424430.1917	HvPUT1	TF_motif_seq_0261	594	-	GTCAC	(Motif sequence only)
HORVU.MOREX.r3.5HG0424430.1918	HvPUT1	TF_motif_seq_0261	599	+	GATAC	(Motif sequence only)
HORVU.MOREX.r3.5HG0424430.1919	HvPUT1	TF_motif_seq_0261	629	+	AAGAC	(Motif sequence only)
HORVU.MOREX.r3.5HG0424430.1920	HvPUT1	TF_motif_seq_0261	906	+	GAAAC	(Motif sequence only)
HORVU.MOREX.r3.5HG0424430.1921	HvPUT1	TF_motif_seq_0261	915	+	TAGAC	(Motif sequence only)
HORVU.MOREX.r3.5HG0424430.1922	HvPUT1	TF_motif_seq_0261	939	+	GATAC	(Motif sequence only)
HORVU.MOREX.r3.5HG0424430.1923	HvPUT1	TF_motif_seq_0261	982	+	AAGAC	(Motif sequence only)
HORVU.MOREX.r3.5HG0424430.1924	HvPUT1	TF_motif_seq_0261	1056	-	GTCTG	(Motif sequence only)
HORVU.MOREX.r3.5HG0424430.1925	HvPUT1	TF_motif_seq_0261	1093	-	GTTTC	(Motif sequence only)
HORVU.MOREX.r3.5HG0424430.1926	HvPUT1	TF_motif_seq_0261	1143	-	TTCTC	(Motif sequence only)
HORVU.MOREX.r3.5HG0424430.1927	HvPUT1	TF_motif_seq_0261	1145	-	CTCTC	(Motif sequence only)
HORVU.MOREX.r3.5HG0424430.1928	HvPUT1	TF_motif_seq_0261	1150	+	GAGTC	(Motif sequence only)
HORVU.MOREX.r3.5HG0424430.1929	HvPUT1	TF_motif_seq_0261	1283	+	GAAAC	(Motif sequence only)
HORVU.MOREX.r3.5HG0424430.1930	HvPUT1	TF_motif_seq_0261	1357	+	AAGAC	(Motif sequence only)
HORVU.MOREX.r3.5HG0424430.1931	HvPUT1	TF_motif_seq_0261	1387	-	TTCTC	(Motif sequence only)
HORVU.MOREX.r3.5HG0424430.1932	HvPUT1	TF_motif_seq_0261	1420	-	GTCCC	(Motif sequence only)
HORVU.MOREX.r3.5HG0424430.1933	HvPUT1	TF_motif_seq_0261	1478	+	GGGAC	(Motif sequence only)
HORVU.MOREX.r3.5HG0424430.1934	HvPUT1	TF_motif_seq_0263	18	-	GAGGC	(Motif sequence only)
HORVU.MOREX.r3.5HG0424430.1935	HvPUT1	TF_motif_seq_0263	22	-	CTGGC	(Motif sequence only)
HORVU.MOREX.r3.5HG0424430.1936	HvPUT1	TF_motif_seq_0263	27	-	GTGGT	(Motif sequence only)
HORVU.MOREX.r3.5HG0424430.1937	HvPUT1	TF_motif_seq_0263	76	-	CTGGC	(Motif sequence only)
HORVU.MOREX.r3.5HG0424430.1938	HvPUT1	TF_motif_seq_0263	79	+	GCAAC	(Motif sequence only)
HORVU.MOREX.r3.5HG0424430.1939	HvPUT1	TF_motif_seq_0263	82	+	ACCAC	(Motif sequence only)
HORVU.MOREX.r3.5HG0424430.1940	HvPUT1	TF_motif_seq_0263	107	+	GCCAT	(Motif sequence only)
HORVU.MOREX.r3.5HG0424430.1941	HvPUT1	TF_motif_seq_0263	113	+	GCCAC	(Motif sequence only)
HORVU.MOREX.r3.5HG0424430.1942	HvPUT1	TF_motif_seq_0263	116	+	ACCAC	(Motif sequence only)
HORVU.MOREX.r3.5HG0424430.1943	HvPUT1	TF_motif_seq_0263	166	-	GTGGC	(Motif sequence only)
HORVU.MOREX.r3.5HG0424430.1944	HvPUT1	TF_motif_seq_0263	207	-	GTGCC	(Motif sequence only)
HORVU.MOREX.r3.5HG0424430.1945	HvPUT1	TF_motif_seq_0263	209	+	GCCAC	(Motif sequence only)
HORVU.MOREX.r3.5HG0424430.1946	HvPUT1	TF_motif_seq_0263	215	+	GCTAC	(Motif sequence only)
HORVU.MOREX.r3.5HG0424430.1947	HvPUT1	TF_motif_seq_0263	245	+	GCGAC	(Motif sequence only)
HORVU.MOREX.r3.5HG0424430.1948	HvPUT1	TF_motif_seq_0263	252	-	GCGGC	(Motif sequence only)
HORVU.MOREX.r3.5HG0424430.1949	HvPUT1	TF_motif_seq_0263	266	+	ACCAC	(Motif sequence only)
HORVU.MOREX.r3.5HG0424430.1950	HvPUT1	TF_motif_seq_0263	358	-	GGGGC	(Motif sequence only)
HORVU.MOREX.r3.5HG0424430.1951	HvPUT1	TF_motif_seq_0263	371	+	ACCAC	(Motif sequence only)
HORVU.MOREX.r3.5HG0424430.1952	HvPUT1	TF_motif_seq_0263	390	+	TCCAC	(Motif sequence only)
HORVU.MOREX.r3.5HG0424430.1953	HvPUT1	TF_motif_seq_0263	399	-	GTAGC	(Motif sequence only)
HORVU.MOREX.r3.5HG0424430.1954	HvPUT1	TF_motif_seq_0263	418	-	GAGGC	(Motif sequence only)
HORVU.MOREX.r3.5HG0424430.1955	HvPUT1	TF_motif_seq_0263	495	-	ATGGC	(Motif sequence only)
HORVU.MOREX.r3.5HG0424430.1956	HvPUT1	TF_motif_seq_0263	557	+	GCCAG	(Motif sequence only)
HORVU.MOREX.r3.5HG0424430.1957	HvPUT1	TF_motif_seq_0263	561	+	GCCGC	(Motif sequence only)
HORVU.MOREX.r3.5HG0424430.1958	HvPUT1	TF_motif_seq_0263	577	+	GACAC	(Motif sequence only)
HORVU.MOREX.r3.5HG0424430.1959	HvPUT1	TF_motif_seq_0263	585	+	GCCCC	(Motif sequence only)
HORVU.MOREX.r3.5HG0424430.1960	HvPUT1	TF_motif_seq_0263	587	+	CCCAC	(Motif sequence only)
HORVU.MOREX.r3.5HG0424430.1961	HvPUT1	TF_motif_seq_0263	594	+	GTCAC	(Motif sequence only)
HORVU.MOREX.r3.5HG0424430.1962	HvPUT1	TF_motif_seq_0263	611	+	GCCAT	(Motif sequence only)
HORVU.MOREX.r3.5HG0424430.1963	HvPUT1	TF_motif_seq_0263	660	-	TTGGC	(Motif sequence only)
HORVU.MOREX.r3.5HG0424430.1964	HvPUT1	TF_motif_seq_0263	757	-	GTGGG	(Motif sequence only)
HORVU.MOREX.r3.5HG0424430.1965	HvPUT1	TF_motif_seq_0263	760	+	GGCAC	(Motif sequence only)
HORVU.MOREX.r3.5HG0424430.1966	HvPUT1	TF_motif_seq_0263	831	-	GTGGT	(Motif sequence only)
HORVU.MOREX.r3.5HG0424430.1967	HvPUT1	TF_motif_seq_0263	851	-	GTGGG	(Motif sequence only)
HORVU.MOREX.r3.5HG0424430.1968	HvPUT1	TF_motif_seq_0263	899	-	GTGCC	(Motif sequence only)
HORVU.MOREX.r3.5HG0424430.1969	HvPUT1	TF_motif_seq_0263	935	-	GTGGG	(Motif sequence only)
HORVU.MOREX.r3.5HG0424430.1970	HvPUT1	TF_motif_seq_0263	971	+	GCAAC	(Motif sequence only)
HORVU.MOREX.r3.5HG0424430.1971	HvPUT1	TF_motif_seq_0265	29	+	GGTCC	(Motif sequence only)
HORVU.MOREX.r3.5HG0424430.1972	HvPUT1	TF_motif_seq_0265	29	-	GGTCC	(Motif sequence only)
HORVU.MOREX.r3.5HG0424430.1973	HvPUT1	TF_motif_seq_0265	133	-	CGCCC	(Motif sequence only)
HORVU.MOREX.r3.5HG0424430.1974	HvPUT1	TF_motif_seq_0265	138	-	GTCCC	(Motif sequence only)
HORVU.MOREX.r3.5HG0424430.1975	HvPUT1	TF_motif_seq_0265	171	-	TGCCC	(Motif sequence only)
HORVU.MOREX.r3.5HG0424430.1976	HvPUT1	TF_motif_seq_0265	207	+	GTGCC	(Motif sequence only)
HORVU.MOREX.r3.5HG0424430.1977	HvPUT1	TF_motif_seq_0265	243	+	GGGCG	(Motif sequence only)
HORVU.MOREX.r3.5HG0424430.1978	HvPUT1	TF_motif_seq_0265	250	+	GGGCG	(Motif sequence only)
HORVU.MOREX.r3.5HG0424430.1979	HvPUT1	TF_motif_seq_0265	332	+	CGGCC	(Motif sequence only)
HORVU.MOREX.r3.5HG0424430.1980	HvPUT1	TF_motif_seq_0265	333	-	GGCCT	(Motif sequence only)
HORVU.MOREX.r3.5HG0424430.1981	HvPUT1	TF_motif_seq_0265	342	+	GGGCT	(Motif sequence only)
HORVU.MOREX.r3.5HG0424430.1982	HvPUT1	TF_motif_seq_0265	358	+	GGGGC	(Motif sequence only)
HORVU.MOREX.r3.5HG0424430.1983	HvPUT1	TF_motif_seq_0265	359	+	GGGCC	(Motif sequence only)
HORVU.MOREX.r3.5HG0424430.1984	HvPUT1	TF_motif_seq_0265	359	-	GGGCC	(Motif sequence only)
HORVU.MOREX.r3.5HG0424430.1985	HvPUT1	TF_motif_seq_0265	360	-	GGCCT	(Motif sequence only)
HORVU.MOREX.r3.5HG0424430.1986	HvPUT1	TF_motif_seq_0265	378	-	GGCTC	(Motif sequence only)
HORVU.MOREX.r3.5HG0424430.1987	HvPUT1	TF_motif_seq_0265	404	-	TGCCC	(Motif sequence only)
HORVU.MOREX.r3.5HG0424430.1988	HvPUT1	TF_motif_seq_0265	419	+	AGGCC	(Motif sequence only)
HORVU.MOREX.r3.5HG0424430.1989	HvPUT1	TF_motif_seq_0265	420	+	GGCCC	(Motif sequence only)
HORVU.MOREX.r3.5HG0424430.1990	HvPUT1	TF_motif_seq_0265	420	-	GGCCC	(Motif sequence only)
HORVU.MOREX.r3.5HG0424430.1991	HvPUT1	TF_motif_seq_0265	461	-	GACCC	(Motif sequence only)
HORVU.MOREX.r3.5HG0424430.1992	HvPUT1	TF_motif_seq_0265	496	+	TGGCC	(Motif sequence only)
HORVU.MOREX.r3.5HG0424430.1993	HvPUT1	TF_motif_seq_0265	497	-	GGCCT	(Motif sequence only)
HORVU.MOREX.r3.5HG0424430.1994	HvPUT1	TF_motif_seq_0265	506	+	GGGCA	(Motif sequence only)
HORVU.MOREX.r3.5HG0424430.1995	HvPUT1	TF_motif_seq_0265	518	-	GGCTC	(Motif sequence only)
HORVU.MOREX.r3.5HG0424430.1996	HvPUT1	TF_motif_seq_0265	555	+	GGGCC	(Motif sequence only)
HORVU.MOREX.r3.5HG0424430.1997	HvPUT1	TF_motif_seq_0265	555	-	GGGCC	(Motif sequence only)
HORVU.MOREX.r3.5HG0424430.1998	HvPUT1	TF_motif_seq_0265	556	-	GGCCA	(Motif sequence only)
HORVU.MOREX.r3.5HG0424430.1999	HvPUT1	TF_motif_seq_0265	583	+	GGGCC	(Motif sequence only)
HORVU.MOREX.r3.5HG0424430.2000	HvPUT1	TF_motif_seq_0265	583	-	GGGCC	(Motif sequence only)
HORVU.MOREX.r3.5HG0424430.2001	HvPUT1	TF_motif_seq_0265	584	+	GGCCC	(Motif sequence only)
HORVU.MOREX.r3.5HG0424430.2002	HvPUT1	TF_motif_seq_0265	584	-	GGCCC	(Motif sequence only)
HORVU.MOREX.r3.5HG0424430.2003	HvPUT1	TF_motif_seq_0265	585	-	GCCCC	(Motif sequence only)
HORVU.MOREX.r3.5HG0424430.2004	HvPUT1	TF_motif_seq_0265	759	+	GGGCA	(Motif sequence only)
HORVU.MOREX.r3.5HG0424430.2005	HvPUT1	TF_motif_seq_0265	760	-	GGCAC	(Motif sequence only)
HORVU.MOREX.r3.5HG0424430.2006	HvPUT1	TF_motif_seq_0265	845	+	GGTCC	(Motif sequence only)
HORVU.MOREX.r3.5HG0424430.2007	HvPUT1	TF_motif_seq_0265	845	-	GGTCC	(Motif sequence only)
HORVU.MOREX.r3.5HG0424430.2008	HvPUT1	TF_motif_seq_0265	899	+	GTGCC	(Motif sequence only)
HORVU.MOREX.r3.5HG0424430.2009	HvPUT1	TF_motif_seq_0265	1340	-	CGCCC	(Motif sequence only)
HORVU.MOREX.r3.5HG0424430.2010	HvPUT1	TF_motif_seq_0265	1345	-	AGCCC	(Motif sequence only)
HORVU.MOREX.r3.5HG0424430.2011	HvPUT1	TF_motif_seq_0265	1380	+	GGTCC	(Motif sequence only)
HORVU.MOREX.r3.5HG0424430.2012	HvPUT1	TF_motif_seq_0265	1380	-	GGTCC	(Motif sequence only)
HORVU.MOREX.r3.5HG0424430.2013	HvPUT1	TF_motif_seq_0265	1420	-	GTCCC	(Motif sequence only)
HORVU.MOREX.r3.5HG0424430.2014	HvPUT1	TF_motif_seq_0265	1434	+	GGGCT	(Motif sequence only)
HORVU.MOREX.r3.5HG0424430.2015	HvPUT1	TF_motif_seq_0265	1478	+	GGGAC	(Motif sequence only)
HORVU.MOREX.r3.5HG0424430.2016	HvPUT1	TF_motif_seq_0268	183	+	CGATT	(Motif sequence only)
HORVU.MOREX.r3.5HG0424430.2017	HvPUT1	TF_motif_seq_0268	487	-	AATCT	(Motif sequence only)
HORVU.MOREX.r3.5HG0424430.2018	HvPUT1	TF_motif_seq_0268	512	+	CGATT	(Motif sequence only)
HORVU.MOREX.r3.5HG0424430.2019	HvPUT1	TF_motif_seq_0268	615	+	TGATT	(Motif sequence only)
HORVU.MOREX.r3.5HG0424430.2020	HvPUT1	TF_motif_seq_0268	812	+	CGATT	(Motif sequence only)
HORVU.MOREX.r3.5HG0424430.2021	HvPUT1	TF_motif_seq_0268	1107	+	TGATT	(Motif sequence only)
HORVU.MOREX.r3.5HG0424430.2022	HvPUT1	TF_motif_seq_0268	1131	-	AATCC	(Motif sequence only)
HORVU.MOREX.r3.5HG0424430.2023	HvPUT1	TF_motif_seq_0268	1226	+	TGATT	(Motif sequence only)
HORVU.MOREX.r3.5HG0424430.2024	HvPUT1	TF_motif_seq_0268	1258	+	TGATT	(Motif sequence only)
HORVU.MOREX.r3.5HG0424430.2025	HvPUT1	TF_motif_seq_0268	1324	-	AATCA	(Motif sequence only)
HORVU.MOREX.r3.5HG0424430.2026	HvPUT1	TF_motif_seq_0268	1375	-	AATCT	(Motif sequence only)
HORVU.MOREX.r3.5HG0424430.2027	HvPUT1	TF_motif_seq_0268	1411	-	AATCC	(Motif sequence only)
HORVU.MOREX.r3.5HG0424430.2028	HvPUT1	TF_motif_seq_0268	1472	-	AATCT	(Motif sequence only)
HORVU.MOREX.r3.5HG0424430.2029	HvPUT1	TF_motif_seq_0274	77	+	TGGCA	(Motif sequence only)
HORVU.MOREX.r3.5HG0424430.2030	HvPUT1	TF_motif_seq_0274	77	-	TGGCA	(Motif sequence only)
HORVU.MOREX.r3.5HG0424430.2031	HvPUT1	TF_motif_seq_0274	93	+	GGTCA	(Motif sequence only)
HORVU.MOREX.r3.5HG0424430.2032	HvPUT1	TF_motif_seq_0274	106	+	TGCCA	(Motif sequence only)
HORVU.MOREX.r3.5HG0424430.2033	HvPUT1	TF_motif_seq_0274	106	-	TGCCA	(Motif sequence only)
HORVU.MOREX.r3.5HG0424430.2034	HvPUT1	TF_motif_seq_0274	187	+	TGTCT	(Motif sequence only)
HORVU.MOREX.r3.5HG0424430.2035	HvPUT1	TF_motif_seq_0274	208	+	TGCCA	(Motif sequence only)
HORVU.MOREX.r3.5HG0424430.2036	HvPUT1	TF_motif_seq_0274	208	-	TGCCA	(Motif sequence only)
HORVU.MOREX.r3.5HG0424430.2037	HvPUT1	TF_motif_seq_0274	413	-	GGACA	(Motif sequence only)
HORVU.MOREX.r3.5HG0424430.2038	HvPUT1	TF_motif_seq_0274	440	+	TGTAA	(Motif sequence only)
HORVU.MOREX.r3.5HG0424430.2039	HvPUT1	TF_motif_seq_0274	472	-	TGACC	(Motif sequence only)
HORVU.MOREX.r3.5HG0424430.2040	HvPUT1	TF_motif_seq_0274	477	-	TGATA	(Motif sequence only)
HORVU.MOREX.r3.5HG0424430.2041	HvPUT1	TF_motif_seq_0274	484	-	TGAAA	(Motif sequence only)
HORVU.MOREX.r3.5HG0424430.2042	HvPUT1	TF_motif_seq_0274	501	-	TGAGA	(Motif sequence only)
HORVU.MOREX.r3.5HG0424430.2043	HvPUT1	TF_motif_seq_0274	531	+	TGTCC	(Motif sequence only)
HORVU.MOREX.r3.5HG0424430.2044	HvPUT1	TF_motif_seq_0274	576	+	TGACA	(Motif sequence only)
HORVU.MOREX.r3.5HG0424430.2045	HvPUT1	TF_motif_seq_0274	576	-	TGACA	(Motif sequence only)
HORVU.MOREX.r3.5HG0424430.2046	HvPUT1	TF_motif_seq_0274	593	+	AGTCA	(Motif sequence only)
HORVU.MOREX.r3.5HG0424430.2047	HvPUT1	TF_motif_seq_0274	606	-	CGACA	(Motif sequence only)
HORVU.MOREX.r3.5HG0424430.2048	HvPUT1	TF_motif_seq_0274	625	+	TGTAA	(Motif sequence only)
HORVU.MOREX.r3.5HG0424430.2049	HvPUT1	TF_motif_seq_0274	630	-	AGACA	(Motif sequence only)
HORVU.MOREX.r3.5HG0424430.2050	HvPUT1	TF_motif_seq_0274	651	-	TGAAA	(Motif sequence only)
HORVU.MOREX.r3.5HG0424430.2051	HvPUT1	TF_motif_seq_0274	661	+	TGGCA	(Motif sequence only)
HORVU.MOREX.r3.5HG0424430.2052	HvPUT1	TF_motif_seq_0274	661	-	TGGCA	(Motif sequence only)
HORVU.MOREX.r3.5HG0424430.2053	HvPUT1	TF_motif_seq_0274	671	-	TTACA	(Motif sequence only)
HORVU.MOREX.r3.5HG0424430.2054	HvPUT1	TF_motif_seq_0274	948	+	TGTAA	(Motif sequence only)
HORVU.MOREX.r3.5HG0424430.2055	HvPUT1	TF_motif_seq_0274	983	-	AGACA	(Motif sequence only)
HORVU.MOREX.r3.5HG0424430.2056	HvPUT1	TF_motif_seq_0274	988	-	TCACA	(Motif sequence only)
HORVU.MOREX.r3.5HG0424430.2057	HvPUT1	TF_motif_seq_0274	1014	+	TTTCA	(Motif sequence only)
HORVU.MOREX.r3.5HG0424430.2058	HvPUT1	TF_motif_seq_0274	1016	-	TCACA	(Motif sequence only)
HORVU.MOREX.r3.5HG0424430.2059	HvPUT1	TF_motif_seq_0274	1063	-	TGACC	(Motif sequence only)
HORVU.MOREX.r3.5HG0424430.2060	HvPUT1	TF_motif_seq_0274	1083	-	TGATA	(Motif sequence only)
HORVU.MOREX.r3.5HG0424430.2061	HvPUT1	TF_motif_seq_0274	1151	+	AGTCA	(Motif sequence only)
HORVU.MOREX.r3.5HG0424430.2062	HvPUT1	TF_motif_seq_0274	1156	-	TTACA	(Motif sequence only)
HORVU.MOREX.r3.5HG0424430.2063	HvPUT1	TF_motif_seq_0274	1168	+	TGACA	(Motif sequence only)
HORVU.MOREX.r3.5HG0424430.2064	HvPUT1	TF_motif_seq_0274	1168	-	TGACA	(Motif sequence only)
HORVU.MOREX.r3.5HG0424430.2065	HvPUT1	TF_motif_seq_0274	1216	-	TGATA	(Motif sequence only)
HORVU.MOREX.r3.5HG0424430.2066	HvPUT1	TF_motif_seq_0274	1264	+	TTTCA	(Motif sequence only)
HORVU.MOREX.r3.5HG0424430.2067	HvPUT1	TF_motif_seq_0274	1293	-	TTACA	(Motif sequence only)
HORVU.MOREX.r3.5HG0424430.2068	HvPUT1	TF_motif_seq_0274	1358	-	AGACA	(Motif sequence only)
HORVU.MOREX.r3.5HG0424430.2069	HvPUT1	TF_motif_seq_0274	1419	+	TGTCC	(Motif sequence only)
HORVU.MOREX.r3.5HG0424430.2070	HvPUT1	TF_motif_seq_0275	46	-	ATCAA	(Motif sequence only)
HORVU.MOREX.r3.5HG0424430.2071	HvPUT1	TF_motif_seq_0275	78	-	GGCAA	(Motif sequence only)
HORVU.MOREX.r3.5HG0424430.2072	HvPUT1	TF_motif_seq_0275	94	-	GTCAG	(Motif sequence only)
HORVU.MOREX.r3.5HG0424430.2073	HvPUT1	TF_motif_seq_0275	129	+	TTCAC	(Motif sequence only)
HORVU.MOREX.r3.5HG0424430.2074	HvPUT1	TF_motif_seq_0275	186	+	TTGTC	(Motif sequence only)
HORVU.MOREX.r3.5HG0424430.2075	HvPUT1	TF_motif_seq_0275	223	-	ATCAA	(Motif sequence only)
HORVU.MOREX.r3.5HG0424430.2076	HvPUT1	TF_motif_seq_0275	263	+	TCGAC	(Motif sequence only)
HORVU.MOREX.r3.5HG0424430.2077	HvPUT1	TF_motif_seq_0275	441	-	GTAAA	(Motif sequence only)
HORVU.MOREX.r3.5HG0424430.2078	HvPUT1	TF_motif_seq_0275	446	+	TGGAC	(Motif sequence only)
HORVU.MOREX.r3.5HG0424430.2079	HvPUT1	TF_motif_seq_0275	471	+	ATGAC	(Motif sequence only)
HORVU.MOREX.r3.5HG0424430.2080	HvPUT1	TF_motif_seq_0275	526	+	TTTAC	(Motif sequence only)
HORVU.MOREX.r3.5HG0424430.2081	HvPUT1	TF_motif_seq_0275	575	+	CTGAC	(Motif sequence only)
HORVU.MOREX.r3.5HG0424430.2082	HvPUT1	TF_motif_seq_0275	594	-	GTCAC	(Motif sequence only)
HORVU.MOREX.r3.5HG0424430.2083	HvPUT1	TF_motif_seq_0275	619	+	TTGAG	(Motif sequence only)
HORVU.MOREX.r3.5HG0424430.2084	HvPUT1	TF_motif_seq_0275	626	-	GTAAA	(Motif sequence only)
HORVU.MOREX.r3.5HG0424430.2085	HvPUT1	TF_motif_seq_0275	631	-	GACAA	(Motif sequence only)
HORVU.MOREX.r3.5HG0424430.2086	HvPUT1	TF_motif_seq_0275	650	+	TTGAA	(Motif sequence only)
HORVU.MOREX.r3.5HG0424430.2087	HvPUT1	TF_motif_seq_0275	660	+	TTGGC	(Motif sequence only)
HORVU.MOREX.r3.5HG0424430.2088	HvPUT1	TF_motif_seq_0275	665	-	ATCAA	(Motif sequence only)
HORVU.MOREX.r3.5HG0424430.2089	HvPUT1	TF_motif_seq_0275	708	+	TTTAC	(Motif sequence only)
HORVU.MOREX.r3.5HG0424430.2090	HvPUT1	TF_motif_seq_0275	723	-	TTCAA	(Motif sequence only)
HORVU.MOREX.r3.5HG0424430.2091	HvPUT1	TF_motif_seq_0275	807	+	TTAAC	(Motif sequence only)
HORVU.MOREX.r3.5HG0424430.2092	HvPUT1	TF_motif_seq_0275	915	+	TAGAC	(Motif sequence only)
HORVU.MOREX.r3.5HG0424430.2093	HvPUT1	TF_motif_seq_0275	1015	+	TTCAC	(Motif sequence only)
HORVU.MOREX.r3.5HG0424430.2094	HvPUT1	TF_motif_seq_0275	1062	+	TTGAC	(Motif sequence only)
HORVU.MOREX.r3.5HG0424430.2095	HvPUT1	TF_motif_seq_0275	1152	-	GTCAT	(Motif sequence only)
HORVU.MOREX.r3.5HG0424430.2096	HvPUT1	TF_motif_seq_0275	1167	+	TTGAC	(Motif sequence only)
HORVU.MOREX.r3.5HG0424430.2097	HvPUT1	TF_motif_seq_0275	1169	-	GACAA	(Motif sequence only)
HORVU.MOREX.r3.5HG0424430.2098	HvPUT1	TF_motif_seq_0275	1196	-	GTTAA	(Motif sequence only)
HORVU.MOREX.r3.5HG0424430.2099	HvPUT1	TF_motif_seq_0275	1197	+	TTAAC	(Motif sequence only)
HORVU.MOREX.r3.5HG0424430.2100	HvPUT1	TF_motif_seq_0275	1265	-	TTCAA	(Motif sequence only)
HORVU.MOREX.r3.5HG0424430.2101	HvPUT1	TF_motif_seq_0275	1359	-	GACAA	(Motif sequence only)
HORVU.MOREX.r3.5HG0424430.2102	HvPUT1	TF_motif_seq_0275	1366	-	GTCCA	(Motif sequence only)
HORVU.MOREX.r3.5HG0424430.2103	HvPUT1	TF_motif_seq_0275	1418	+	TTGTC	(Motif sequence only)
HORVU.MOREX.r3.5HG0424430.2104	HvPUT1	TF_motif_seq_0276	1112	-	aTCTTT	(Motif sequence only)
HORVU.MOREX.r3.5HG0424430.2105	HvPUT1	TF_motif_seq_0278	1406	+	AACCCa	(Motif sequence only)
HORVU.MOREX.r3.5HG0424430.2106	HvPUT1	TF_motif_seq_0279	59	-	cACGTT	(Motif sequence only)
HORVU.MOREX.r3.5HG0424430.2107	HvPUT1	TF_motif_seq_0283	715	-	tTTATT	(Motif sequence only)
HORVU.MOREX.r3.5HG0424430.2108	HvPUT1	TF_motif_seq_0283	719	-	tTTATT	(Motif sequence only)
HORVU.MOREX.r3.5HG0424430.2109	HvPUT1	TF_motif_seq_0283	823	-	tTTATT	(Motif sequence only)
HORVU.MOREX.r3.5HG0424430.2110	HvPUT1	TF_motif_seq_0283	1260	-	aTTATT	(Motif sequence only)
HORVU.MOREX.r3.5HG0424430.2111	HvPUT1	TF_motif_seq_0283	1306	+	AATAAa	(Motif sequence only)
HORVU.MOREX.r3.5HG0424430.2112	HvPUT1	TF_motif_seq_0283	1401	+	AATAAa	(Motif sequence only)
HORVU.MOREX.r3.5HG0424430.2113	HvPUT1	TF_motif_seq_0288	1138	-	aTGAGT	(Motif sequence only)
HORVU.MOREX.r3.5HG0424430.2114	HvPUT1	TF_motif_seq_0291	237	+	AGCAGc	(Motif sequence only)
HORVU.MOREX.r3.5HG0424430.2115	HvPUT1	TF_motif_seq_0294	472	-	tGACCT	(Motif sequence only)
HORVU.MOREX.r3.5HG0424430.2116	HvPUT1	TF_motif_seq_0303	930	-	aATATG	(Motif sequence only)
HORVU.MOREX.r3.5HG0424430.2117	HvPUT1	TF_motif_seq_0303	1121	+	CATATt	(Motif sequence only)
HORVU.MOREX.r3.5HG0424430.2118	HvPUT1	TF_motif_seq_0303	1231	-	aATATG	(Motif sequence only)
HORVU.MOREX.r3.5HG0424430.2119	HvPUT1	TF_motif_seq_0303	1327	+	CATATa	(Motif sequence only)
HORVU.MOREX.r3.5HG0424430.2120	HvPUT1	TF_motif_seq_0308	246	-	cGACGG	(Motif sequence only)
HORVU.MOREX.r3.5HG0424430.2121	HvPUT1	TF_motif_seq_0309	712	+	CCTTTt	(Motif sequence only)
HORVU.MOREX.r3.5HG0424430.2122	HvPUT1	TF_motif_seq_0309	1383	+	CCTTTt	(Motif sequence only)
HORVU.MOREX.r3.5HG0424430.2123	HvPUT1	TF_motif_seq_0309	1395	-	aAAAGG	(Motif sequence only)
HORVU.MOREX.r3.5HG0424430.2124	HvPUT1	TF_motif_seq_0315	310	-	tTTTTC	(Motif sequence only)
HORVU.MOREX.r3.5HG0424430.2125	HvPUT1	TF_motif_seq_0315	639	-	tTTTTC	(Motif sequence only)
HORVU.MOREX.r3.5HG0424430.2126	HvPUT1	TF_motif_seq_0315	781	+	GAAAAa	(Motif sequence only)
HORVU.MOREX.r3.5HG0424430.2127	HvPUT1	TF_motif_seq_0315	1031	-	tTTTTC	(Motif sequence only)
HORVU.MOREX.r3.5HG0424430.2128	HvPUT1	TF_motif_seq_0315	1189	-	tTTTTC	(Motif sequence only)
HORVU.MOREX.r3.5HG0424430.2129	HvPUT1	TF_motif_seq_0317	193	+	GATAAg	(Motif sequence only)
HORVU.MOREX.r3.5HG0424430.2130	HvPUT1	TF_motif_seq_0318	251	-	gGCGGC	(Motif sequence only)
HORVU.MOREX.r3.5HG0424430.2131	HvPUT1	TF_motif_seq_0318	561	+	GCCGCt	(Motif sequence only)
HORVU.MOREX.r3.5HG0424430.2132	HvPUT1	TF_motif_seq_0321	121	-	aTTTCC	(Motif sequence only)
HORVU.MOREX.r3.5HG0424430.2133	HvPUT1	TF_motif_seq_0321	310	-	tTTTTC	(Motif sequence only)
HORVU.MOREX.r3.5HG0424430.2134	HvPUT1	TF_motif_seq_0321	387	-	aTTTCC	(Motif sequence only)
HORVU.MOREX.r3.5HG0424430.2135	HvPUT1	TF_motif_seq_0321	639	-	tTTTTC	(Motif sequence only)
HORVU.MOREX.r3.5HG0424430.2136	HvPUT1	TF_motif_seq_0321	640	-	tTTTCC	(Motif sequence only)
HORVU.MOREX.r3.5HG0424430.2137	HvPUT1	TF_motif_seq_0321	652	+	GAAAAt	(Motif sequence only)
HORVU.MOREX.r3.5HG0424430.2138	HvPUT1	TF_motif_seq_0321	708	-	tTTACC	(Motif sequence only)
HORVU.MOREX.r3.5HG0424430.2139	HvPUT1	TF_motif_seq_0321	731	-	aTTTCC	(Motif sequence only)
HORVU.MOREX.r3.5HG0424430.2140	HvPUT1	TF_motif_seq_0321	781	+	GAAAAa	(Motif sequence only)
HORVU.MOREX.r3.5HG0424430.2141	HvPUT1	TF_motif_seq_0321	854	+	GGAAAt	(Motif sequence only)
HORVU.MOREX.r3.5HG0424430.2142	HvPUT1	TF_motif_seq_0321	1031	-	tTTTTC	(Motif sequence only)
HORVU.MOREX.r3.5HG0424430.2143	HvPUT1	TF_motif_seq_0321	1109	-	aTTATC	(Motif sequence only)
HORVU.MOREX.r3.5HG0424430.2144	HvPUT1	TF_motif_seq_0321	1189	-	tTTTTC	(Motif sequence only)
HORVU.MOREX.r3.5HG0424430.2145	HvPUT1	TF_motif_seq_0321	1441	-	aTTTCC	(Motif sequence only)
HORVU.MOREX.r3.5HG0424430.2146	HvPUT1	TF_motif_seq_0321	1447	-	aTTACC	(Motif sequence only)
HORVU.MOREX.r3.5HG0424430.2147	HvPUT1	TF_motif_seq_0323	278	-	tCGTGA	(Motif sequence only)
HORVU.MOREX.r3.5HG0424430.2148	HvPUT1	TF_motif_seq_0323	428	+	TCACGa	(Motif sequence only)
HORVU.MOREX.r3.5HG0424430.2149	HvPUT1	TF_motif_seq_0323	595	+	TCACGa	(Motif sequence only)
HORVU.MOREX.r3.5HG0424430.2150	HvPUT1	TF_motif_seq_0328	191	-	tGGATA	(Motif sequence only)
HORVU.MOREX.r3.5HG0424430.2151	HvPUT1	TF_motif_seq_0334	171	-	tGCCCA	(Motif sequence only)
HORVU.MOREX.r3.5HG0424430.2152	HvPUT1	TF_motif_seq_0334	341	+	TGGGCt	(Motif sequence only)
HORVU.MOREX.r3.5HG0424430.2153	HvPUT1	TF_motif_seq_0334	420	-	gGCCCA	(Motif sequence only)
HORVU.MOREX.r3.5HG0424430.2154	HvPUT1	TF_motif_seq_0334	554	+	TGGGCc	(Motif sequence only)
HORVU.MOREX.r3.5HG0424430.2155	HvPUT1	TF_motif_seq_0334	582	+	TGGGCc	(Motif sequence only)
HORVU.MOREX.r3.5HG0424430.2156	HvPUT1	TF_motif_seq_0334	758	+	TGGGCa	(Motif sequence only)
HORVU.MOREX.r3.5HG0424430.2157	HvPUT1	TF_motif_seq_0334	1340	-	cGCCCA	(Motif sequence only)
HORVU.MOREX.r3.5HG0424430.2158	HvPUT1	TF_motif_seq_0336	192	-	gGATAA	(Motif sequence only)
HORVU.MOREX.r3.5HG0424430.2159	HvPUT1	TF_motif_seq_0341	80	+	cAACCA	(Motif sequence only)
HORVU.MOREX.r3.5HG0424430.2160	HvPUT1	TF_motif_seq_0341	784	+	aAACCA	(Motif sequence only)
HORVU.MOREX.r3.5HG0424430.2161	HvPUT1	TF_motif_seq_0341	820	-	TGGTTt	(Motif sequence only)
HORVU.MOREX.r3.5HG0424430.2162	HvPUT1	TF_motif_seq_0341	832	-	TGGTTt	(Motif sequence only)
HORVU.MOREX.r3.5HG0424430.2163	HvPUT1	TF_motif_seq_0341	925	+	aAACCA	(Motif sequence only)
HORVU.MOREX.r3.5HG0424430.2164	HvPUT1	TF_motif_seq_0341	1047	-	TGGTTa	(Motif sequence only)
HORVU.MOREX.r3.5HG0424430.2165	HvPUT1	TF_motif_seq_0341	1186	-	TGGTTt	(Motif sequence only)
HORVU.MOREX.r3.5HG0424430.2166	HvPUT1	TF_motif_seq_0341	1235	-	TGGTTc	(Motif sequence only)
HORVU.MOREX.r3.5HG0424430.2167	HvPUT1	TF_motif_seq_0341	1284	+	aAACCA	(Motif sequence only)
HORVU.MOREX.r3.5HG0424430.2168	HvPUT1	TF_motif_seq_0342	480	+	tAACTG	(Motif sequence only)
HORVU.MOREX.r3.5HG0424430.2169	HvPUT1	TF_motif_seq_0342	1415	-	CAGTTg	(Motif sequence only)
HORVU.MOREX.r3.5HG0424430.2170	HvPUT1	TF_motif_seq_0343	545	+	AAACAta	(Motif sequence only)
HORVU.MOREX.r3.5HG0424430.2171	HvPUT1	TF_motif_seq_0343	682	+	AAACAac	(Motif sequence only)
HORVU.MOREX.r3.5HG0424430.2172	HvPUT1	TF_motif_seq_0343	835	-	ttTGTTT	(Motif sequence only)
HORVU.MOREX.r3.5HG0424430.2173	HvPUT1	TF_motif_seq_0343	878	-	ttTGTTT	(Motif sequence only)
HORVU.MOREX.r3.5HG0424430.2174	HvPUT1	TF_motif_seq_0343	956	-	ctTGTTT	(Motif sequence only)
HORVU.MOREX.r3.5HG0424430.2175	HvPUT1	TF_motif_seq_0343	1370	+	AAACAaa	(Motif sequence only)
HORVU.MOREX.r3.5HG0424430.2176	HvPUT1	TF_motif_seq_0344	814	-	atTTGTT	(Motif sequence only)
HORVU.MOREX.r3.5HG0424430.2177	HvPUT1	TF_motif_seq_0344	834	-	gtTTGTT	(Motif sequence only)
HORVU.MOREX.r3.5HG0424430.2178	HvPUT1	TF_motif_seq_0344	865	-	ggTTGTT	(Motif sequence only)
HORVU.MOREX.r3.5HG0424430.2179	HvPUT1	TF_motif_seq_0344	877	-	ttTTGTT	(Motif sequence only)
HORVU.MOREX.r3.5HG0424430.2180	HvPUT1	TF_motif_seq_0344	883	-	ttTTGTT	(Motif sequence only)
HORVU.MOREX.r3.5HG0424430.2181	HvPUT1	TF_motif_seq_0344	922	+	AACAAac	(Motif sequence only)
HORVU.MOREX.r3.5HG0424430.2182	HvPUT1	TF_motif_seq_0344	1204	+	AACAAac	(Motif sequence only)
HORVU.MOREX.r3.5HG0424430.2183	HvPUT1	TF_motif_seq_0344	1371	+	AACAAat	(Motif sequence only)
HORVU.MOREX.r3.5HG0424430.2184	HvPUT1	TF_motif_seq_0346	1131	+	AATCCaa	(Motif sequence only)
HORVU.MOREX.r3.5HG0424430.2185	HvPUT1	TF_motif_seq_0346	1411	+	AATCCag	(Motif sequence only)
HORVU.MOREX.r3.5HG0424430.2186	HvPUT1	TF_motif_seq_0350	271	+	ACCTAga	(Motif sequence only)
HORVU.MOREX.r3.5HG0424430.2187	HvPUT1	TF_motif_seq_0350	771	+	ACCGAaa	(Motif sequence only)
HORVU.MOREX.r3.5HG0424430.2188	HvPUT1	TF_motif_seq_0350	778	+	ACCGAaa	(Motif sequence only)
HORVU.MOREX.r3.5HG0424430.2189	HvPUT1	TF_motif_seq_0350	1191	-	ttTCGGT	(Motif sequence only)
HORVU.MOREX.r3.5HG0424430.2190	HvPUT1	TF_motif_seq_0353	57	-	taCACGT	(Motif sequence only)
HORVU.MOREX.r3.5HG0424430.2191	HvPUT1	TF_motif_seq_0354	57	-	taCACGT	(Motif sequence only)
HORVU.MOREX.r3.5HG0424430.2192	HvPUT1	TF_motif_seq_0361	1174	-	gtGCATG	(Motif sequence only)
HORVU.MOREX.r3.5HG0424430.2193	HvPUT1	TF_motif_seq_0362	1174	-	gtGCATG	(Motif sequence only)
HORVU.MOREX.r3.5HG0424430.2194	HvPUT1	TF_motif_seq_0363	928	+	CCAATat	(Motif sequence only)
HORVU.MOREX.r3.5HG0424430.2195	HvPUT1	TF_motif_seq_0366	142	+	CTAACga	(Motif sequence only)
HORVU.MOREX.r3.5HG0424430.2196	HvPUT1	TF_motif_seq_0372	429	-	caCGAAC	(Motif sequence only)
HORVU.MOREX.r3.5HG0424430.2197	HvPUT1	TF_motif_seq_0372	691	-	caTGTAC	(Motif sequence only)
HORVU.MOREX.r3.5HG0424430.2198	HvPUT1	TF_motif_seq_0372	965	+	GTAAGtg	(Motif sequence only)
HORVU.MOREX.r3.5HG0424430.2199	HvPUT1	TF_motif_seq_0372	1430	+	GTACGgg	(Motif sequence only)
HORVU.MOREX.r3.5HG0424430.2200	HvPUT1	TF_motif_seq_0374	58	-	aCACGTt	(Motif sequence only)
HORVU.MOREX.r3.5HG0424430.2201	HvPUT1	TF_motif_seq_0375	881	+	gTTTTTg	(Motif sequence only)
HORVU.MOREX.r3.5HG0424430.2202	HvPUT1	TF_motif_seq_0375	892	+	gTTTTTg	(Motif sequence only)
HORVU.MOREX.r3.5HG0424430.2203	HvPUT1	TF_motif_seq_0375	1242	+	gTTTTTa	(Motif sequence only)
HORVU.MOREX.r3.5HG0424430.2204	HvPUT1	TF_motif_seq_0380	59	-	caCGTTA	(Motif sequence only)
HORVU.MOREX.r3.5HG0424430.2205	HvPUT1	TF_motif_seq_0387	190	-	ctGGATA	(Motif sequence only)
HORVU.MOREX.r3.5HG0424430.2206	HvPUT1	TF_motif_seq_0389	647	+	TATTTga	(Motif sequence only)
HORVU.MOREX.r3.5HG0424430.2207	HvPUT1	TF_motif_seq_0389	717	+	TATTTat	(Motif sequence only)
HORVU.MOREX.r3.5HG0424430.2208	HvPUT1	TF_motif_seq_0389	1012	+	TATTTca	(Motif sequence only)
HORVU.MOREX.r3.5HG0424430.2209	HvPUT1	TF_motif_seq_0389	1262	+	TATTTca	(Motif sequence only)
HORVU.MOREX.r3.5HG0424430.2210	HvPUT1	TF_motif_seq_0392	1116	-	ttTTGCA	(Motif sequence only)
HORVU.MOREX.r3.5HG0424430.2211	HvPUT1	TF_motif_seq_0399	618	+	TTTGAgc	(Motif sequence only)
HORVU.MOREX.r3.5HG0424430.2212	HvPUT1	TF_motif_seq_0402	300	-	aagGGTTT	(Motif sequence only)
HORVU.MOREX.r3.5HG0424430.2213	HvPUT1	TF_motif_seq_0402	1089	-	taaGGTTT	(Motif sequence only)
HORVU.MOREX.r3.5HG0424430.2214	HvPUT1	TF_motif_seq_0402	1405	+	AAACCcaa	(Motif sequence only)
HORVU.MOREX.r3.5HG0424430.2215	HvPUT1	TF_motif_seq_0403	1372	+	acaAATCT	(Motif sequence only)
HORVU.MOREX.r3.5HG0424430.2216	HvPUT1	TF_motif_seq_0423	23	-	tggCGTGG	(Motif sequence only)
HORVU.MOREX.r3.5HG0424430.2217	HvPUT1	TF_motif_seq_0425	72	-	ccgTCTGG	(Motif sequence only)
HORVU.MOREX.r3.5HG0424430.2218	HvPUT1	TF_motif_seq_0425	269	-	acaCCTAG	(Motif sequence only)
HORVU.MOREX.r3.5HG0424430.2219	HvPUT1	TF_motif_seq_0425	1023	+	CCATGtgc	(Motif sequence only)
HORVU.MOREX.r3.5HG0424430.2220	HvPUT1	TF_motif_seq_0425	1414	+	CCAGTtgt	(Motif sequence only)
HORVU.MOREX.r3.5HG0424430.2221	HvPUT1	TF_motif_seq_0429	128	-	cttCACGC	(Motif sequence only)
HORVU.MOREX.r3.5HG0424430.2222	HvPUT1	TF_motif_seq_0429	241	+	GCGGGcga	(Motif sequence only)
HORVU.MOREX.r3.5HG0424430.2223	HvPUT1	TF_motif_seq_0429	731	-	attTCCGC	(Motif sequence only)
HORVU.MOREX.r3.5HG0424430.2224	HvPUT1	TF_motif_seq_0429	737	+	GCAGGaac	(Motif sequence only)
HORVU.MOREX.r3.5HG0424430.2225	HvPUT1	TF_motif_seq_0429	851	+	GTGGGaaa	(Motif sequence only)
HORVU.MOREX.r3.5HG0424430.2226	HvPUT1	TF_motif_seq_0429	935	+	GTGGGata	(Motif sequence only)
HORVU.MOREX.r3.5HG0424430.2227	HvPUT1	TF_motif_seq_0429	1448	-	ttaCCAGC	(Motif sequence only)
HORVU.MOREX.r3.5HG0424430.2228	HvPUT1	TF_motif_seq_0432	29	+	GGTCCgat	(Motif sequence only)
HORVU.MOREX.r3.5HG0424430.2229	HvPUT1	TF_motif_seq_0432	206	+	GGTGCcac	(Motif sequence only)
HORVU.MOREX.r3.5HG0424430.2230	HvPUT1	TF_motif_seq_0432	218	-	acgGGATC	(Motif sequence only)
HORVU.MOREX.r3.5HG0424430.2231	HvPUT1	TF_motif_seq_0432	356	-	atgGGGCC	(Motif sequence only)
HORVU.MOREX.r3.5HG0424430.2232	HvPUT1	TF_motif_seq_0432	581	-	ctgGGCCC	(Motif sequence only)
HORVU.MOREX.r3.5HG0424430.2233	HvPUT1	TF_motif_seq_0432	584	+	GGCCCcac	(Motif sequence only)
HORVU.MOREX.r3.5HG0424430.2234	HvPUT1	TF_motif_seq_0432	845	+	GGTCCggt	(Motif sequence only)
HORVU.MOREX.r3.5HG0424430.2235	HvPUT1	TF_motif_seq_0432	1380	+	GGTCCttt	(Motif sequence only)
HORVU.MOREX.r3.5HG0424430.2236	HvPUT1	TF_motif_seq_0432	1419	+	TGTCCctt	(Motif sequence only)
HORVU.MOREX.r3.5HG0424430.2237	HvPUT1	TF_motif_seq_0434	912	+	GAATAgac	(Motif sequence only)
HORVU.MOREX.r3.5HG0424430.2238	HvPUT1	TF_motif_seq_0434	938	+	GGATAccc	(Motif sequence only)
HORVU.MOREX.r3.5HG0424430.2239	HvPUT1	TF_motif_seq_0434	1120	+	GCATAtta	(Motif sequence only)
HORVU.MOREX.r3.5HG0424430.2240	HvPUT1	TF_motif_seq_0434	1305	+	GAATAaac	(Motif sequence only)
HORVU.MOREX.r3.5HG0424430.2241	HvPUT1	TF_motif_seq_0435	424	-	cagATCAC	(Motif sequence only)
HORVU.MOREX.r3.5HG0424430.2242	HvPUT1	TF_motif_seq_0435	984	-	gacATCAC	(Motif sequence only)
HORVU.MOREX.r3.5HG0424430.2243	HvPUT1	TF_motif_seq_0437	831	+	GTGGTttg	(Motif sequence only)
HORVU.MOREX.r3.5HG0424430.2244	HvPUT1	TF_motif_seq_0440	785	+	aACCAAac	(Motif sequence only)
HORVU.MOREX.r3.5HG0424430.2245	HvPUT1	TF_motif_seq_0445	364	+	TAAATgca	(Motif sequence only)
HORVU.MOREX.r3.5HG0424430.2246	HvPUT1	TF_motif_seq_0445	442	+	TAAATgga	(Motif sequence only)
HORVU.MOREX.r3.5HG0424430.2247	HvPUT1	TF_motif_seq_0445	536	+	TAAATgct	(Motif sequence only)
HORVU.MOREX.r3.5HG0424430.2248	HvPUT1	TF_motif_seq_0445	704	-	tgcATTTA	(Motif sequence only)
HORVU.MOREX.r3.5HG0424430.2249	HvPUT1	TF_motif_seq_0449	472	+	TGACCtga	(Motif sequence only)
HORVU.MOREX.r3.5HG0424430.2250	HvPUT1	TF_motif_seq_0449	961	-	tttCGTAA	(Motif sequence only)
HORVU.MOREX.r3.5HG0424430.2251	HvPUT1	TF_motif_seq_0449	1063	+	TGACCgaa	(Motif sequence only)
HORVU.MOREX.r3.5HG0424430.2252	HvPUT1	TF_motif_seq_0450	472	+	TGACCtga	(Motif sequence only)
HORVU.MOREX.r3.5HG0424430.2253	HvPUT1	TF_motif_seq_0450	661	-	tggCATCA	(Motif sequence only)
HORVU.MOREX.r3.5HG0424430.2254	HvPUT1	TF_motif_seq_0450	980	+	TGAAGaca	(Motif sequence only)
HORVU.MOREX.r3.5HG0424430.2255	HvPUT1	TF_motif_seq_0450	983	-	agaCATCA	(Motif sequence only)
HORVU.MOREX.r3.5HG0424430.2256	HvPUT1	TF_motif_seq_0454	715	+	TTTATtta	(Motif sequence only)
HORVU.MOREX.r3.5HG0424430.2257	HvPUT1	TF_motif_seq_0454	1327	-	catATAAA	(Motif sequence only)
HORVU.MOREX.r3.5HG0424430.2258	HvPUT1	TF_motif_seq_0455	388	+	TTTCCacc	(Motif sequence only)
HORVU.MOREX.r3.5HG0424430.2259	HvPUT1	TF_motif_seq_0455	851	-	gtgGGAAA	(Motif sequence only)
HORVU.MOREX.r3.5HG0424430.2260	HvPUT1	TF_motif_seq_0458	851	-	gtGGGAAa	(Motif sequence only)
HORVU.MOREX.r3.5HG0424430.2261	HvPUT1	TF_motif_seq_0485	420	+	GGCCCagat	(Motif sequence only)
HORVU.MOREX.r3.5HG0424430.2262	HvPUT1	TF_motif_seq_0485	551	-	aaatGGGCC	(Motif sequence only)
HORVU.MOREX.r3.5HG0424430.2263	HvPUT1	TF_motif_seq_0485	579	-	cactGGGCC	(Motif sequence only)
HORVU.MOREX.r3.5HG0424430.2264	HvPUT1	TF_motif_seq_0491	707	-	attTACCTt	(Motif sequence only)
HORVU.MOREX.r3.6HG0606680.2	HVPUT2	TFmatrixID_0001	79	+	aAATTAttta	AT-Hook	AT1G63480
HORVU.MOREX.r3.6HG0606680.2	HVPUT2	TFmatrixID_0001	330	+	cAATTAtttg	AT-Hook	AT1G63480
HORVU.MOREX.r3.6HG0606680.2	HVPUT2	TFmatrixID_0002	328	-	aacAATTAtt	AT-Hook	AT1G63480
HORVU.MOREX.r3.6HG0606680.2	HVPUT2	TFmatrixID_0005	608	-	aatTTAATtg	AT-Hook	AT4G14465
HORVU.MOREX.r3.6HG0606680.2	HVPUT2	TFmatrixID_0005	977	+	gaATTAAata	AT-Hook	AT4G14465
HORVU.MOREX.r3.6HG0606680.2	HVPUT2	TFmatrixID_0006	939	-	taaaATAATa	AT-Hook	AT4G14465
HORVU.MOREX.r3.6HG0606680.2	HVPUT2	TFmatrixID_0007	608	-	aattTAATTg	AT-Hook	AT4G35390
HORVU.MOREX.r3.6HG0606680.2	HVPUT2	TFmatrixID_0007	977	+	gAATTAaata	AT-Hook	AT4G35390
HORVU.MOREX.r3.6HG0606680.2	HVPUT2	TFmatrixID_0008	1294	+	gAATATtttg	AT-Hook	AT4G35390
HORVU.MOREX.r3.6HG0606680.2	HVPUT2	TFmatrixID_0008	1308	+	aAATATttta	AT-Hook	AT4G35390
HORVU.MOREX.r3.6HG0606680.2	HVPUT2	TFmatrixID_0009	78	+	taaaTTATTt	AT-Hook	AT4G35390
HORVU.MOREX.r3.6HG0606680.2	HVPUT2	TFmatrixID_0014	152	+	agAGATAcgt	MYB; ARR-B	AT1G67710
HORVU.MOREX.r3.6HG0606680.2	HVPUT2	TFmatrixID_0015	1396	+	gcGGATCctg	MYB; ARR-B	AT1G67710
HORVU.MOREX.r3.6HG0606680.2	HVPUT2	TFmatrixID_0015	1396	-	gcgGATCCtg	MYB; ARR-B	AT1G67710
HORVU.MOREX.r3.6HG0606680.2	HVPUT2	TFmatrixID_0017	153	+	gaGATACgtg	Myb/SANT; MYB; ARR-B	AT2G01760
HORVU.MOREX.r3.6HG0606680.2	HVPUT2	TFmatrixID_0018	1396	+	gcGGATCctg	Myb/SANT; MYB; ARR-B	AT2G01760
HORVU.MOREX.r3.6HG0606680.2	HVPUT2	TFmatrixID_0018	1396	-	gcgGATCCtg	Myb/SANT; MYB; ARR-B	AT2G01760
HORVU.MOREX.r3.6HG0606680.2	HVPUT2	TFmatrixID_0026	79	+	aaATTATtta	bZIP; Homeodomain; HD-ZIP	AT5G03790
HORVU.MOREX.r3.6HG0606680.2	HVPUT2	TFmatrixID_0026	330	+	caATTATttg	bZIP; Homeodomain; HD-ZIP	AT5G03790
HORVU.MOREX.r3.6HG0606680.2	HVPUT2	TFmatrixID_0027	615	+	tTGACGtgaa	bZIP	AT1G42990
HORVU.MOREX.r3.6HG0606680.2	HVPUT2	TFmatrixID_0028	615	-	ttGACGTgaa	bZIP	AT1G42990
HORVU.MOREX.r3.6HG0606680.2	HVPUT2	TFmatrixID_0029	1470	+	ataATATCtc	MYB-related	AT2G46830
HORVU.MOREX.r3.6HG0606680.2	HVPUT2	TFmatrixID_0030	103	+	aAGATAcata	MYB-related	AT2G46830
HORVU.MOREX.r3.6HG0606680.2	HVPUT2	TFmatrixID_0030	153	+	gAGATAcgtg	MYB-related	AT2G46830
HORVU.MOREX.r3.6HG0606680.2	HVPUT2	TFmatrixID_0030	172	+	aAGATAtact	MYB-related	AT2G46830
HORVU.MOREX.r3.6HG0606680.2	HVPUT2	TFmatrixID_0031	93	+	aaAAAAGtaa	Dof	AT2G46590
HORVU.MOREX.r3.6HG0606680.2	HVPUT2	TFmatrixID_0034	851	-	gGTCGGttgt	AP2; ERF	AT2G23340
HORVU.MOREX.r3.6HG0606680.2	HVPUT2	TFmatrixID_0035	805	+	gcgCCGACcc	AP2; ERF	AT4G36900
HORVU.MOREX.r3.6HG0606680.2	HVPUT2	TFmatrixID_0042	585	-	attGATCTaa	GATA; tify	AT5G25830
HORVU.MOREX.r3.6HG0606680.2	HVPUT2	TFmatrixID_0044	245	-	atAGATTttt	MYB; G2-like	AT2G20570
HORVU.MOREX.r3.6HG0606680.2	HVPUT2	TFmatrixID_0044	1429	+	cagAATCTtg	MYB; G2-like	AT2G20570
HORVU.MOREX.r3.6HG0606680.2	HVPUT2	TFmatrixID_0048	697	-	aGAATAtttc	Myb/SANT; MYB; G2-like	AT5G16560
HORVU.MOREX.r3.6HG0606680.2	HVPUT2	TFmatrixID_0048	1271	+	cacaTATTCt	Myb/SANT; MYB; G2-like	AT5G16560
HORVU.MOREX.r3.6HG0606680.2	HVPUT2	TFmatrixID_0048	1293	-	aGAATAtttt	Myb/SANT; MYB; G2-like	AT5G16560
HORVU.MOREX.r3.6HG0606680.2	HVPUT2	TFmatrixID_0057	477	-	taTGTTGa	AP2; RAV	AT1G25560
HORVU.MOREX.r3.6HG0606680.2	HVPUT2	TFmatrixID_0057	524	+	aCAACAtt	AP2; RAV	AT1G25560
HORVU.MOREX.r3.6HG0606680.2	HVPUT2	TFmatrixID_0058	76	+	agtaaATTATttag	Homeodomain; bZIP; HD-ZIP	AT3G01470
HORVU.MOREX.r3.6HG0606680.2	HVPUT2	TFmatrixID_0058	327	+	gaacaATTATttga	Homeodomain; bZIP; HD-ZIP	AT3G01470
HORVU.MOREX.r3.6HG0606680.2	HVPUT2	TFmatrixID_0063	477	-	taTGTTGa	AP2; RAV	AT1G68840
HORVU.MOREX.r3.6HG0606680.2	HVPUT2	TFmatrixID_0064	806	+	cgCCGACcc	AP2; ERF;ERF	AT1G19210;AT1G74930;AT4G31060;AT5G21960;BRADI2G57200;BRADI3G37544;Glyma04g06100.1;Glyma06g06100.1;Glyma09g08330.1;Glyma13g17250.1;Glyma15g19910.1;Glyma17g05240.1;Glyma17g33530.1;Os06g0223100;Os08g0454000;Os02g0781300;Os06g0197600;LOC_Os06g09760;LOC_Os06g09790;LOC_Os06g09810;POPTR_0005s15830;POPTR_0006s08000;POPTR_0006s14090;POPTR_0006s14100;POPTR_0006s23480;POPTR_0018s00700;POPTR_0018s08320;Sb07g…
HORVU.MOREX.r3.6HG0606680.2	HVPUT2	TFmatrixID_0064	850	-	ggGTCGGtt	AP2; ERF;ERF	AT1G19210;AT1G74930;AT4G31060;AT5G21960;BRADI2G57200;BRADI3G37544;Glyma04g06100.1;Glyma06g06100.1;Glyma09g08330.1;Glyma13g17250.1;Glyma15g19910.1;Glyma17g05240.1;Glyma17g33530.1;Os06g0223100;Os08g0454000;Os02g0781300;Os06g0197600;LOC_Os06g09760;LOC_Os06g09790;LOC_Os06g09810;POPTR_0005s15830;POPTR_0006s08000;POPTR_0006s14090;POPTR_0006s14100;POPTR_0006s23480;POPTR_0018s00700;POPTR_0018s08320;Sb07g…
HORVU.MOREX.r3.6HG0606680.2	HVPUT2	TFmatrixID_0065	1278	+	tcttCCAAAttagtaaga	MADS box; MIKC	AT4G18960
HORVU.MOREX.r3.6HG0606680.2	HVPUT2	TFmatrixID_0067	806	+	cgCCGACcca	AP2; ERF;ERF	AT1G22190;AT1G36060;AT1G64380;AT1G71130;AT1G78080;AT2G20880;AT2G22200;AT2G40220;AT3G57600;AT3G61630;AT4G13620;AT4G28140;AT4G39780;AT5G65130;BRADI1G45470;BRADI1G71740;BRADI1G72990;BRADI2G15847;BRADI3G24000;BRADI3G35560;BRADI3G38140;BRADI3G49810;BRADI3G58980;BRADI4G29010;BRADI5G16450;Glyma01g43350.1;Glyma01g43450.1;Glyma02g31350.1;Glyma02g43240.1;Glyma03g23330.1;Glyma03g29530.1;Glyma04g11290.1;Glym…
HORVU.MOREX.r3.6HG0606680.2	HVPUT2	TFmatrixID_0067	849	-	tggGTCGGtt	AP2; ERF;ERF	AT1G22190;AT1G36060;AT1G64380;AT1G71130;AT1G78080;AT2G20880;AT2G22200;AT2G40220;AT3G57600;AT3G61630;AT4G13620;AT4G28140;AT4G39780;AT5G65130;BRADI1G45470;BRADI1G71740;BRADI1G72990;BRADI2G15847;BRADI3G24000;BRADI3G35560;BRADI3G38140;BRADI3G49810;BRADI3G58980;BRADI4G29010;BRADI5G16450;Glyma01g43350.1;Glyma01g43450.1;Glyma02g31350.1;Glyma02g43240.1;Glyma03g23330.1;Glyma03g29530.1;Glyma04g11290.1;Glym…
HORVU.MOREX.r3.6HG0606680.2	HVPUT2	TFmatrixID_0070	805	+	gcgCCGACc	AP2; ERF;ERF	AT1G12630;AT1G77200;AT2G35700;AT2G36450;AT2G44940;AT4G25490;AT5G11590;AT5G25810;AT5G51990;BRADI1G38110;BRADI3G08790;BRADI3G31600;BRADI3G50620;BRADI3G50630;BRADI5G17610;BRADI5G17620;BRADI5G18850;Glyma01g13410.1;Glyma01g35010.1;Glyma01g42510.1;Glyma03g27050.1;Glyma03g34970.1;Glyma03g41910.1;Glyma04g08900.1;Glyma05g03540.1;Glyma05g04920.1;Glyma05g35740.1;Glyma06g08990.1;Glyma07g02000.1;Glyma07g06080…
HORVU.MOREX.r3.6HG0606680.2	HVPUT2	TFmatrixID_0076	999	-	tgGGTAGgt	trp	P27898
HORVU.MOREX.r3.6HG0606680.2	HVPUT2	TFmatrixID_0080	850	-	ggGTCGGttg	AP2; ERF;ERF	AT1G01250;AT1G77200;AT2G25820;AT2G35700;AT2G44940;AT3G16280;AT3G60490;AT4G16750;AT4G25490;AT5G11590;AT5G25810;AT5G51990;BRADI1G38110;BRADI2G06180;BRADI3G08790;BRADI3G33355;BRADI3G50620;BRADI3G50630;BRADI4G21265;BRADI5G17610;BRADI5G17620;BRADI5G17630;BRADI5G17640;Glyma01g13410.1;Glyma01g35010.1;Glyma01g42510.1;Glyma03g27050.1;Glyma03g34970.1;Glyma03g41910.1;Glyma04g08900.1;Glyma05g03540.1;Glyma05g…
HORVU.MOREX.r3.6HG0606680.2	HVPUT2	TFmatrixID_0082	805	+	gCGCCGacc	AP2; ERF;ERF	AT1G04370;AT1G53910;AT3G23220;AT3G61630;AT4G17500;AT4G18450;AT4G34410;AT5G07310;AT5G50080;AT5G61590;AT5G61890;AT5G64750;BRADI1G75040;BRADI2G11890;BRADI2G24170;BRADI2G56140;BRADI3G27690;BRADI3G41543;BRADI3G50490;BRADI5G08380;BRADI5G17480;BRADI5G17490;BRADI5G25570;Glyma01g41520.1;Glyma02g00870.1;Glyma02g00890.1;Glyma02g07310.1;Glyma02g08840.1;Glyma02g14940.1;Glyma02g46340.1;Glyma03g26310.1;Glyma03g…
[truncated: 25,951 more rows]
[truncated: 2 more columns]

## Sheet: Table S6
Supplementary Table S6: Details of predicted miRNA target sites in CDS region of PA transporter genes in barley.
miRNA_Acc.	Target_Acc.	Expectation	UPE$	miRNA_length	Target_start	Target_end	miRNA_aligned_fragment	Target_aligned_fragment	Inhibition
hvu-miR6181	HvPUT6	4.5	22.769	23	1453	1475	UGCUCUUCAUGGACUGCGGCGCC	GUUGCUGCUGUCCAUCAAGAGGA	Cleavage
hvu-miR1120	HvPUT3	5	15.971	24	64	86	ACAUUCUUAUAUUAUGGGACGGAG	GUUGGUGUCA-AGUAUGAGAGUGU	Cleavage
[truncated: 6 more rows]

## Sheet: Table S7
Supplementary Table S7: Protein-protein interaction network of PA transporter genes in barley
[truncated: 55 more rows]

[truncated: 5 more sheets: Table S8, Table S9, Table S10, Table S11, Table S12]
